# Supplementary material for: Extreme learning machine based optimal embedding location finder for image steganography
Source: PLoS One. 2017 Feb 14;12(2):e0170329. doi: 10.1371/journal.pone.0170329 (PMC5308843; doi:10.1371/journal.pone.0170329)
Supplement: S1 File — (XLSX) [file pone.0170329.s001.xlsx]

## Sheet: fig 1
C	Corr	Enr	Corr	H	Corr	Ent	Corr	Corr	Corr	M	Corr	Std	Corr
0.404157	0.999998	2.34966	0.999998	0.749461	0.999998	2.34966	0.999998	0.784868	0.999998	80.2866	0.999998	35.7772	0.999998
0.409817	0.999998	2.36611	0.999998	0.749555	0.999998	2.36611	0.999998	0.784937	0.999998	80.4036	0.999998	36.2881	0.999998
0.412623	0.999998	2.37018	0.999998	0.749793	0.999998	2.37018	0.999998	0.78501	0.999998	80.5292	0.999998	36.3254	0.999998
0.415851	0.999998	2.38036	0.999998	0.749817	0.999998	2.38036	0.999998	0.785044	0.999998	80.6431	0.999998	36.827	0.999998
0.418646	0.999998	2.38731	0.999998	0.749834	0.999998	2.38731	0.999998	0.785205	0.999998	80.8359	0.999998	36.8662	0.999998
0.419393	0.999998	2.39218	0.999998	0.749843	0.999998	2.39218	0.999998	0.785273	0.999998	81.1036	0.999998	36.8829	0.999998
0.424247	0.999998	2.39432	0.999998	0.749861	0.999998	2.39432	0.999998	0.785305	0.999998	81.1166	0.999998	37.3305	0.999998
0.426283	0.999998	2.40198	0.999998	0.749881	0.999998	2.40198	0.999998	0.786539	0.999998	81.2066	0.999998	37.3591	0.999998
0.426314	0.999998	2.40973	0.999998	0.749888	0.999998	2.40973	0.999998	0.786672	0.999998	81.3113	0.999998	37.4084	0.999998
0.426797	0.999998	2.41136	0.999998	0.74992	0.999998	2.41136	0.999998	0.786674	0.999998	81.4223	0.999998	37.4283	0.999998
0.433639	0.999998	2.41583	0.999998	0.749941	0.999998	2.41583	0.999998	0.786785	0.999998	81.4288	0.999998	37.8216	0.999998
0.433922	0.999998	2.41625	0.999998	0.74998	0.999998	2.41625	0.999998	0.786834	0.999998	81.6295	0.999998	37.9131	0.999998
0.434469	0.999998	2.42424	0.999998	0.749988	0.999998	2.42424	0.999998	0.786838	0.999998	81.7127	0.999998	37.9165	0.999998
0.435582	0.999998	2.42802	0.999998	0.750046	0.999998	2.42802	0.999998	0.787048	0.999998	81.9029	0.999998	37.9177	0.999998
0.439736	0.999998	2.43357	0.999998	0.75012	0.999998	2.43357	0.999998	0.787349	0.999998	81.9251	0.999998	37.9752	0.999998
0.442678	0.999998	2.43395	0.999998	0.750146	0.999998	2.43395	0.999998	0.787429	0.999998	81.9778	0.999998	38.2392	0.999998
0.443126	0.999998	2.43888	0.999998	0.750163	0.999998	2.43888	0.999998	0.787735	0.999998	81.9955	0.999998	38.3912	0.999998
0.444196	0.999998	2.43937	0.999998	0.750194	0.999998	2.43937	0.999998	0.787819	0.999998	82.0791	0.999998	38.4585	0.999998
0.445437	0.999998	2.44404	0.999998	0.750216	0.999998	2.44404	0.999998	0.787877	0.999998	82.1799	0.999998	38.4747	0.999998
0.448897	0.999998	2.44852	0.999998	0.750222	0.999998	2.44852	0.999998	0.788245	0.999998	82.2152	0.999998	38.4972	0.999998
0.451987	0.999998	2.45095	0.999998	0.750229	0.999998	2.45095	0.999998	0.788365	0.999998	82.2265	0.999998	38.5168	0.999998
0.452174	0.999998	2.45668	0.999998	0.750254	0.999998	2.45668	0.999998	0.788418	0.999998	82.3867	0.999998	38.6148	0.999998
0.452223	0.999998	2.4576	0.999998	0.750292	0.999998	2.4576	0.999998	0.788481	0.999998	82.5228	0.999998	38.8263	0.999998
0.453169	0.999998	2.46178	0.999998	0.750295	0.999998	2.46178	0.999998	0.788494	0.999998	82.5518	0.999998	38.9647	0.999998
0.455368	0.999998	2.46234	0.999998	0.750304	0.999998	2.46234	0.999998	0.788559	0.999998	82.6697	0.999998	38.9816	0.999998
0.456227	0.999998	2.46333	0.999998	0.75033	0.999998	2.46333	0.999998	0.788566	0.999998	82.77	0.999998	39.0122	0.999998
0.457316	0.999998	2.4673	0.999998	0.750334	0.999998	2.4673	0.999998	0.788628	0.999998	82.795	0.999998	39.0718	0.999998
0.461741	0.999998	2.47282	0.999998	0.750355	0.999998	2.47282	0.999998	0.788632	0.999998	82.8235	0.999998	39.1113	0.999998
0.462174	0.999998	2.4739	0.999998	0.750355	0.999998	2.4739	0.999998	0.788747	0.999998	82.8711	0.999998	39.1655	0.999998
0.463746	0.999998	2.48095	0.999998	0.750365	0.999998	2.48095	0.999998	0.788833	0.999998	82.8878	0.999998	39.2244	0.999998
0.464006	0.999998	2.48119	0.999998	0.750375	0.999998	2.48119	0.999998	0.788839	0.999998	82.9684	0.999998	39.4161	0.999998
0.464125	0.999998	2.48148	0.999998	0.750404	0.999998	2.48148	0.999998	0.788921	0.999998	83.0092	0.999998	39.5153	0.999998
0.464283	0.999998	2.4822	0.999998	0.750515	0.999998	2.4822	0.999998	0.789142	0.999998	83.037	0.999998	39.5296	0.999998
0.466781	0.999998	2.48589	0.999998	0.750628	0.999998	2.48589	0.999998	0.789335	0.999998	83.1578	0.999998	39.613	0.999998
0.467392	0.999998	2.48788	0.999998	0.750652	0.999998	2.48788	0.999998	0.789431	0.999998	83.2509	0.999998	39.6486	0.999998
0.468749	0.999998	2.49097	0.999998	0.750659	0.999998	2.49097	0.999998	0.789547	0.999998	83.3252	0.999998	39.6884	0.999998
0.47022	0.999998	2.49633	0.999998	0.750727	0.999998	2.49633	0.999998	0.789559	0.999998	83.3306	0.999998	39.775	0.999998
0.472182	0.999998	2.4992	0.999998	0.750752	0.999998	2.4992	0.999998	0.789601	0.999998	83.3487	0.999998	39.7878	0.999998
0.473099	0.999998	2.49947	0.999998	0.750782	0.999998	2.49947	0.999998	0.789612	0.999998	83.4524	0.999998	39.8368	0.999998
0.47375	0.999998	2.50132	0.999998	0.750784	0.999998	2.50132	0.999998	0.789632	0.999998	83.4539	0.999998	39.9802	0.999998
0.475193	0.999998	2.5014	0.999998	0.750798	0.999998	2.5014	0.999998	0.789779	0.999998	83.4662	0.999998	40.0995	0.999998
0.475806	0.999998	2.50624	0.999998	0.750883	0.999998	2.50624	0.999998	0.78984	0.999998	83.4958	0.999998	40.1629	0.999998
0.476852	0.999998	2.50646	0.999998	0.75091	0.999998	2.50646	0.999998	0.789851	0.999998	83.501	0.999998	40.1874	0.999998
0.477247	0.999998	2.50859	0.999998	0.750911	0.999998	2.50859	0.999998	0.790036	0.999998	83.564	0.999998	40.2509	0.999998
0.479899	0.999998	2.50862	0.999998	0.750932	0.999998	2.50862	0.999998	0.790317	0.999998	83.6103	0.999998	40.2585	0.999998
0.480731	0.999998	2.5093	0.999998	0.750944	0.999998	2.5093	0.999998	0.790406	0.999998	83.6125	0.999998	40.2952	0.999998
0.480881	0.999998	2.5098	0.999998	0.750956	0.999998	2.5098	0.999998	0.791122	0.999998	83.6334	0.999998	40.395	0.999998
0.481439	0.999998	2.5105	0.999998	0.750997	0.999998	2.5105	0.999998	0.791216	0.999998	83.638	0.999998	40.4157	0.999998
0.482278	0.999998	2.51149	0.999998	0.751052	0.999998	2.51149	0.999998	0.79148	0.999998	83.647	0.999998	40.4244	0.999998
0.483763	0.999998	2.51165	0.999998	0.751088	0.999998	2.51165	0.999998	0.791812	0.999998	83.6934	0.999998	40.5636	0.999998
0.484265	0.999998	2.51571	0.999998	0.751088	0.999998	2.51571	0.999998	0.791861	0.999998	83.7069	0.999998	40.6425	0.999998
0.486643	0.999998	2.51607	0.999998	0.751108	0.999998	2.51607	0.999998	0.791889	0.999998	83.7642	0.999998	40.7083	0.999998
0.488348	0.999998	2.51636	0.999998	0.751126	0.999998	2.51636	0.999998	0.792621	0.999998	83.7719	0.999998	40.7762	0.999998
0.489033	0.999998	2.51665	0.999998	0.751138	0.999998	2.51665	0.999998	0.792635	0.999998	83.7769	0.999998	40.7877	0.999998
0.490761	0.999998	2.51697	0.999998	0.751139	0.999998	2.51697	0.999998	0.792669	0.999998	83.8035	0.999998	40.8396	0.999998
0.490767	0.999998	2.51727	0.999998	0.751148	0.999998	2.51727	0.999998	0.793072	0.999998	83.8065	0.999998	40.8615	0.999998
0.491234	0.999998	2.51762	0.999998	0.75118	0.999998	2.51762	0.999998	0.793171	0.999998	83.82	0.999998	40.9006	0.999998
0.492008	0.999998	2.51769	0.999998	0.751199	0.999998	2.51769	0.999998	0.793264	0.999998	83.8221	0.999998	40.9177	0.999998
0.492804	0.999998	2.5179	0.999998	0.751212	0.999998	2.5179	0.999998	0.793342	0.999998	83.8584	0.999998	41.0188	0.999998
0.492901	0.999998	2.51818	0.999998	0.751226	0.999998	2.51818	0.999998	0.793523	0.999998	83.8702	0.999998	41.0244	0.999998
0.495237	0.999998	2.52167	0.999998	0.751228	0.999998	2.52167	0.999998	0.793556	0.999998	83.9165	0.999998	41.1124	0.999998
0.496926	0.999998	2.52307	0.999998	0.75126	0.999998	2.52307	0.999998	0.79356	0.999998	83.9267	0.999998	41.1969	0.999998
0.49801	0.999998	2.52465	0.999998	0.751302	0.999998	2.52465	0.999998	0.793633	0.999998	83.9826	0.999998	41.2112	0.999998
0.499488	0.999998	2.52498	0.999998	0.751347	0.999998	2.52498	0.999998	0.793652	0.999998	83.9891	0.999998	41.2777	0.999998
0.500483	0.999998	2.52624	0.999998	0.75138	0.999998	2.52624	0.999998	0.793728	0.999998	84.0033	0.999998	41.3599	0.999998
0.501025	0.999998	2.52734	0.999998	0.751405	0.999998	2.52734	0.999998	0.793827	0.999998	84.0755	0.999998	41.3817	0.999998
0.501198	0.999998	2.52739	0.999998	0.751475	0.999998	2.52739	0.999998	0.79384	0.999998	84.0858	0.999998	41.4294	0.999998
0.50214	0.999998	2.52883	0.999998	0.751479	0.999998	2.52883	0.999998	0.793868	0.999998	84.087	0.999998	41.4636	0.999998
0.502937	0.999998	2.52902	0.999998	0.751492	0.999998	2.52902	0.999998	0.79398	0.999998	84.0906	0.999998	41.482	0.999998
0.503018	0.999998	2.53008	0.999998	0.75151	0.999998	2.53008	0.999998	0.793991	0.999998	84.0906	0.999998	41.4879	0.999998
0.505001	0.999998	2.53059	0.999998	0.751536	0.999998	2.53059	0.999998	0.794012	0.999998	84.1372	0.999998	41.532	0.999998
0.505391	0.999998	2.53114	0.999998	0.751552	0.999998	2.53114	0.999998	0.79403	0.999998	84.1668	0.999998	41.5525	0.999998
0.508432	0.999999	2.53182	0.999999	0.751576	0.999999	2.53182	0.999999	0.794051	0.999999	84.1669	0.999999	41.6365	0.999999
0.508827	0.999998	2.53334	0.999998	0.751587	0.999998	2.53334	0.999998	0.794172	0.999998	84.1817	0.999998	41.7261	0.999998
0.509916	0.999998	2.53339	0.999998	0.751608	0.999998	2.53339	0.999998	0.794282	0.999998	84.2282	0.999998	41.7723	0.999998
0.510152	0.999998	2.53343	0.999998	0.751624	0.999998	2.53343	0.999998	0.794388	0.999998	84.2611	0.999998	41.8324	0.999998
0.510882	0.999998	2.53387	0.999998	0.751651	0.999998	2.53387	0.999998	0.794453	0.999998	84.2819	0.999998	41.8398	0.999998
0.511141	0.999998	2.53413	0.999998	0.751667	0.999998	2.53413	0.999998	0.794466	0.999998	84.3012	0.999998	41.8722	0.999998
0.512226	0.999998	2.535	0.999998	0.751671	0.999998	2.535	0.999998	0.794496	0.999998	84.3846	0.999998	41.9099	0.999998
0.512656	0.999998	2.53679	0.999998	0.751747	0.999998	2.53679	0.999998	0.794508	0.999998	84.3875	0.999998	42.0104	0.999998
0.513527	0.999999	2.53829	0.999999	0.751793	0.999999	2.53829	0.999999	0.794771	0.999999	84.3947	0.999999	42.0287	0.999999
0.513741	0.999998	2.5385	0.999998	0.751806	0.999998	2.5385	0.999998	0.795176	0.999998	84.4252	0.999998	42.1081	0.999998
0.513947	0.999998	2.54205	0.999998	0.751811	0.999998	2.54205	0.999998	0.795184	0.999998	84.4373	0.999998	42.1102	0.999998
0.514671	0.999998	2.54207	0.999998	0.751813	0.999998	2.54207	0.999998	0.795266	0.999998	84.4394	0.999998	42.1137	0.999998
0.514789	0.999998	2.54276	0.999998	0.751838	0.999998	2.54276	0.999998	0.795282	0.999998	84.4452	0.999998	42.1557	0.999998
0.514948	0.999998	2.54277	0.999998	0.75188	0.999998	2.54277	0.999998	0.795742	0.999998	84.4638	0.999998	42.1624	0.999998
0.515503	0.999998	2.54325	0.999998	0.751885	0.999998	2.54325	0.999998	0.795841	0.999998	84.4799	0.999998	42.1656	0.999998
0.516377	0.999998	2.54486	0.999998	0.751926	0.999998	2.54486	0.999998	0.796256	0.999998	84.4822	0.999998	42.3498	0.999998
0.517314	0.999998	2.54612	0.999998	0.751942	0.999998	2.54612	0.999998	0.796285	0.999998	84.5045	0.999998	42.3906	0.999998
0.519911	0.999999	2.54644	0.999999	0.751942	0.999999	2.54644	0.999999	0.796501	0.999999	84.6209	0.999999	42.4127	0.999999
0.520328	0.999999	2.54733	0.999999	0.751955	0.999999	2.54733	0.999999	0.796524	0.999999	84.6237	0.999999	42.4414	0.999999
0.52094	0.999998	2.54784	0.999998	0.751958	0.999998	2.54784	0.999998	0.796814	0.999998	84.6311	0.999998	42.4677	0.999998
0.520996	0.999999	2.54812	0.999999	0.751967	0.999999	2.54812	0.999999	0.797102	0.999999	84.6421	0.999999	42.4951	0.999999
0.52211	0.999998	2.54939	0.999998	0.751983	0.999998	2.54939	0.999998	0.7972	0.999998	84.6563	0.999998	42.5061	0.999998
0.523244	0.999999	2.54959	0.999999	0.752007	0.999999	2.54959	0.999999	0.797237	0.999999	84.6943	0.999999	42.5491	0.999999
0.523841	0.999998	2.55018	0.999998	0.752151	0.999998	2.55018	0.999998	0.797275	0.999998	84.6992	0.999998	42.571	0.999998
0.524087	0.999999	2.55081	0.999999	0.752171	0.999999	2.55081	0.999999	0.797389	0.999999	84.708	0.999999	42.6923	0.999999
0.524429	0.999998	2.55111	0.999998	0.752202	0.999998	2.55111	0.999998	0.797405	0.999998	84.7308	0.999998	42.7341	0.999998
0.524734	0.999998	2.55121	0.999998	0.752214	0.999998	2.55121	0.999998	0.797443	0.999998	84.7328	0.999998	42.7668	0.999998
0.525442	0.999998	2.5529	0.999998	0.752219	0.999998	2.5529	0.999998	0.797469	0.999998	84.7446	0.999998	42.7691	0.999998
0.525619	0.999998	2.55305	0.999998	0.752225	0.999998	2.55305	0.999998	0.797503	0.999998	84.747	0.999998	42.7914	0.999998
0.525775	0.999999	2.55399	0.999999	0.752231	0.999999	2.55399	0.999999	0.797524	0.999999	84.7541	0.999999	42.845	0.999999
0.527109	0.999998	2.55477	0.999998	0.752241	0.999998	2.55477	0.999998	0.798464	0.999998	84.7747	0.999998	42.8787	0.999998
0.52728	0.999999	2.55499	0.999999	0.752269	0.999999	2.55499	0.999999	0.798525	0.999999	84.816	0.999999	42.9861	0.999999
0.527524	0.999999	2.55653	0.999999	0.752346	0.999999	2.55653	0.999999	0.798559	0.999999	84.8207	0.999999	43.0128	0.999999
0.528075	0.999999	2.55702	0.999999	0.752353	0.999999	2.55702	0.999999	0.7986	0.999999	84.8717	0.999999	43.0295	0.999999
0.528791	0.999999	2.55705	0.999999	0.752372	0.999999	2.55705	0.999999	0.798683	0.999999	84.9067	0.999999	43.0705	0.999999
0.528983	0.999999	2.55868	0.999999	0.752533	0.999999	2.55868	0.999999	0.798705	0.999999	84.9074	0.999999	43.0761	0.999999
0.529363	0.999999	2.55881	0.999999	0.752607	0.999999	2.55881	0.999999	0.798712	0.999999	84.9564	0.999999	43.0861	0.999999
0.529566	0.999998	2.55911	0.999998	0.752674	0.999998	2.55911	0.999998	0.798852	0.999998	84.9634	0.999998	43.1191	0.999998
0.53014	0.999999	2.55928	0.999999	0.752724	0.999999	2.55928	0.999999	0.798926	0.999999	84.9643	0.999999	43.1191	0.999999
0.530169	0.999999	2.55982	0.999999	0.752763	0.999999	2.55982	0.999999	0.798929	0.999999	84.9844	0.999999	43.1298	0.999999
0.531462	0.999998	2.55989	0.999998	0.752774	0.999998	2.55989	0.999998	0.799032	0.999998	85.006	0.999998	43.1512	0.999998
0.531996	0.999999	2.5602	0.999999	0.752782	0.999999	2.5602	0.999999	0.799147	0.999999	85.0591	0.999999	43.1546	0.999999
0.53224	0.999998	2.56037	0.999998	0.752782	0.999998	2.56037	0.999998	0.799155	0.999998	85.0797	0.999998	43.1916	0.999998
0.533167	0.999998	2.56078	0.999998	0.752805	0.999998	2.56078	0.999998	0.799229	0.999998	85.0887	0.999998	43.2549	0.999998
0.533378	0.999998	2.56174	0.999998	0.752813	0.999998	2.56174	0.999998	0.799256	0.999998	85.1064	0.999998	43.3063	0.999998
0.53415	0.999998	2.5633	0.999998	0.752816	0.999998	2.5633	0.999998	0.799278	0.999998	85.1123	0.999998	43.3362	0.999998
0.534877	0.999999	2.56364	0.999999	0.752834	0.999999	2.56364	0.999999	0.799356	0.999999	85.1123	0.999999	43.3828	0.999999
0.535327	0.999999	2.56371	0.999999	0.752872	0.999999	2.56371	0.999999	0.799379	0.999999	85.1325	0.999999	43.4154	0.999999
0.535599	0.999998	2.56374	0.999998	0.752899	0.999998	2.56374	0.999998	0.799433	0.999998	85.1363	0.999998	43.4384	0.999998
0.535644	0.999999	2.56532	0.999999	0.7529	0.999999	2.56532	0.999999	0.799563	0.999999	85.1732	0.999999	43.4692	0.999999
0.536222	0.999998	2.56609	0.999998	0.752926	0.999998	2.56609	0.999998	0.799646	0.999998	85.2272	0.999998	43.4868	0.999998
0.536623	0.999999	2.56654	0.999999	0.752933	0.999999	2.56654	0.999999	0.79966	0.999999	85.2324	0.999999	43.5075	0.999999
0.537305	0.999999	2.56728	0.999999	0.75294	0.999999	2.56728	0.999999	0.799827	0.999999	85.2663	0.999999	43.5392	0.999999
0.537725	0.999999	2.56766	0.999999	0.753058	0.999999	2.56766	0.999999	0.799834	0.999999	85.3051	0.999999	43.6518	0.999999
0.538049	0.999999	2.56779	0.999999	0.75311	0.999999	2.56779	0.999999	0.799927	0.999999	85.4051	0.999999	43.7165	0.999999
0.538594	0.999999	2.56796	0.999999	0.753169	0.999999	2.56796	0.999999	0.799954	0.999999	85.4122	0.999999	43.72	0.999999
0.539127	0.999998	2.5681	0.999998	0.753179	0.999998	2.5681	0.999998	0.80006	0.999998	85.4151	0.999998	43.7353	0.999998
0.540277	0.999999	2.56814	0.999999	0.753272	0.999999	2.56814	0.999999	0.800086	0.999999	85.4201	0.999999	43.7377	0.999999
0.540725	0.999999	2.56895	0.999999	0.753289	0.999999	2.56895	0.999999	0.800129	0.999999	85.4277	0.999999	43.7504	0.999999
0.540766	0.999999	2.56905	0.999999	0.753335	0.999999	2.56905	0.999999	0.800368	0.999999	85.442	0.999999	43.7524	0.999999
0.540904	0.999999	2.56981	0.999999	0.753347	0.999999	2.56981	0.999999	0.800395	0.999999	85.4813	0.999999	43.7554	0.999999
0.5411	0.999999	2.56992	0.999999	0.753386	0.999999	2.56992	0.999999	0.800417	0.999999	85.483	0.999999	43.7661	0.999999
0.541116	0.999999	2.57018	0.999999	0.753431	0.999999	2.57018	0.999999	0.80044	0.999999	85.5539	0.999999	43.7872	0.999999
0.541844	0.999999	2.57054	0.999999	0.75345	0.999999	2.57054	0.999999	0.800463	0.999999	85.5614	0.999999	43.7976	0.999999
0.542278	0.999999	2.5709	0.999999	0.753451	0.999999	2.5709	0.999999	0.800486	0.999999	85.5658	0.999999	43.8071	0.999999
0.542559	0.999999	2.5712	0.999999	0.753456	0.999999	2.5712	0.999999	0.800604	0.999999	85.57	0.999999	43.8081	0.999999
0.543375	0.999999	2.57153	0.999999	0.753465	0.999999	2.57153	0.999999	0.80072	0.999999	85.5728	0.999999	43.8881	0.999999
0.543456	0.999999	2.57167	0.999999	0.75349	0.999999	2.57167	0.999999	0.800808	0.999999	85.5905	0.999999	43.9726	0.999999
0.543461	0.999999	2.57169	0.999999	0.753508	0.999999	2.57169	0.999999	0.800815	0.999999	85.657	0.999999	44.0237	0.999999
0.543497	0.999999	2.57192	0.999999	0.753509	0.999999	2.57192	0.999999	0.800846	0.999999	85.6701	0.999999	44.0463	0.999999
0.544024	0.999999	2.57237	0.999999	0.753554	0.999999	2.57237	0.999999	0.800905	0.999999	85.7365	0.999999	44.0625	0.999999
0.544291	0.999999	2.57255	0.999999	0.753621	0.999999	2.57255	0.999999	0.800948	0.999999	85.7393	0.999999	44.0845	0.999999
0.544511	0.999999	2.57271	0.999999	0.753641	0.999999	2.57271	0.999999	0.801148	0.999999	85.7809	0.999999	44.1183	0.999999
0.544706	0.999999	2.57434	0.999999	0.753658	0.999999	2.57434	0.999999	0.801456	0.999999	85.7872	0.999999	44.1533	0.999999
0.545092	0.999999	2.57486	0.999999	0.753659	0.999999	2.57486	0.999999	0.801457	0.999999	85.8041	0.999999	44.1546	0.999999
0.546736	0.999999	2.57488	0.999999	0.753697	0.999999	2.57488	0.999999	0.801469	0.999999	85.8227	0.999999	44.1604	0.999999
0.546742	0.999999	2.57574	0.999999	0.7537	0.999999	2.57574	0.999999	0.801522	0.999999	85.84	0.999999	44.1759	0.999999
0.547937	0.999999	2.57632	0.999999	0.753707	0.999999	2.57632	0.999999	0.801571	0.999999	85.842	0.999999	44.2317	0.999999
0.547978	0.999999	2.57674	0.999999	0.753723	0.999999	2.57674	0.999999	0.801605	0.999999	85.8653	0.999999	44.359	0.999999
0.548177	0.999999	2.57689	0.999999	0.753777	0.999999	2.57689	0.999999	0.801614	0.999999	85.8967	0.999999	44.3602	0.999999
0.54834	0.999999	2.57794	0.999999	0.753797	0.999999	2.57794	0.999999	0.801617	0.999999	85.91	0.999999	44.3881	0.999999
0.5487	0.999999	2.57805	0.999999	0.753827	0.999999	2.57805	0.999999	0.801638	0.999999	85.9175	0.999999	44.3911	0.999999
0.55036	0.999999	2.57813	0.999999	0.753835	0.999999	2.57813	0.999999	0.801669	0.999999	85.9195	0.999999	44.4027	0.999999
0.551479	0.999999	2.57827	0.999999	0.753866	0.999999	2.57827	0.999999	0.801728	0.999999	85.9259	0.999999	44.4108	0.999999
0.551539	0.999999	2.5784	0.999999	0.754004	0.999999	2.5784	0.999999	0.80174	0.999999	85.9625	0.999999	44.4274	0.999999
0.551791	0.999999	2.57842	0.999999	0.754014	0.999999	2.57842	0.999999	0.801769	0.999999	85.9729	0.999999	44.4461	0.999999
0.551885	0.999999	2.57843	0.999999	0.754074	0.999999	2.57843	0.999999	0.801921	0.999999	85.9766	0.999999	44.4523	0.999999
0.552056	0.999999	2.57918	0.999999	0.754075	0.999999	2.57918	0.999999	0.802052	0.999999	85.9948	0.999999	44.4633	0.999999
0.552082	0.999999	2.57946	0.999999	0.754095	0.999999	2.57946	0.999999	0.802102	0.999999	85.9982	0.999999	44.4693	0.999999
0.552384	0.999999	2.57964	0.999999	0.754157	0.999999	2.57964	0.999999	0.802225	0.999999	86.0036	0.999999	44.4708	0.999999
0.553284	0.999999	2.57984	0.999999	0.754163	0.999999	2.57984	0.999999	0.802383	0.999999	86.0208	0.999999	44.5265	0.999999
0.554291	0.999999	2.58032	0.999999	0.754172	0.999999	2.58032	0.999999	0.802457	0.999999	86.0839	0.999999	44.5421	0.999999
0.554294	0.999999	2.58037	0.999999	0.754302	0.999999	2.58037	0.999999	0.802524	0.999999	86.0984	0.999999	44.5857	0.999999
0.554689	0.999999	2.58037	0.999999	0.754428	0.999999	2.58037	0.999999	0.80254	0.999999	86.1267	0.999999	44.67	0.999999
0.554732	0.999999	2.58099	0.999999	0.754473	0.999999	2.58099	0.999999	0.802624	0.999999	86.1348	0.999999	44.6876	0.999999
0.556707	0.999999	2.58154	0.999999	0.754481	0.999999	2.58154	0.999999	0.802686	0.999999	86.1467	0.999999	44.694	0.999999
0.556844	0.999999	2.58188	0.999999	0.754529	0.999999	2.58188	0.999999	0.802687	0.999999	86.1501	0.999999	44.7009	0.999999
0.55691	0.999999	2.58208	0.999999	0.754532	0.999999	2.58208	0.999999	0.802696	0.999999	86.1547	0.999999	44.7023	0.999999
0.557103	0.999999	2.58212	0.999999	0.75457	0.999999	2.58212	0.999999	0.802701	0.999999	86.1757	0.999999	44.7487	0.999999
0.557488	0.999999	2.58298	0.999999	0.754591	0.999999	2.58298	0.999999	0.802704	0.999999	86.1766	0.999999	44.7592	0.999999
0.557696	0.999999	2.58383	0.999999	0.754657	0.999999	2.58383	0.999999	0.802704	0.999999	86.2175	0.999999	44.8095	0.999999
0.558088	0.999999	2.58415	0.999999	0.754716	0.999999	2.58415	0.999999	0.802718	0.999999	86.2211	0.999999	44.87	0.999999
0.558113	0.999999	2.58452	0.999999	0.754743	0.999999	2.58452	0.999999	0.802725	0.999999	86.2219	0.999999	44.896	0.999999
0.558214	0.999999	2.58529	0.999999	0.754824	0.999999	2.58529	0.999999	0.80277	0.999999	86.2406	0.999999	44.9042	0.999999
0.558588	0.999999	2.58559	0.999999	0.754839	0.999999	2.58559	0.999999	0.802846	0.999999	86.2625	0.999999	44.9137	0.999999
0.558979	0.999999	2.58559	0.999999	0.754858	0.999999	2.58559	0.999999	0.802866	0.999999	86.2753	0.999999	44.9632	0.999999
0.559036	0.999999	2.58624	0.999999	0.754957	0.999999	2.58624	0.999999	0.802889	0.999999	86.2939	0.999999	44.9733	0.999999
0.559705	0.999999	2.58635	0.999999	0.754958	0.999999	2.58635	0.999999	0.802905	0.999999	86.3287	0.999999	44.9888	0.999999
0.55974	0.999999	2.58685	0.999999	0.755025	0.999999	2.58685	0.999999	0.803065	0.999999	86.3442	0.999999	45.0023	0.999999
0.560268	0.999999	2.58739	0.999999	0.755042	0.999999	2.58739	0.999999	0.803156	0.999999	86.357	0.999999	45.0165	0.999999
0.560427	0.999999	2.58764	0.999999	0.755046	0.999999	2.58764	0.999999	0.803164	0.999999	86.3765	0.999999	45.0329	0.999999
0.561074	0.999999	2.58817	0.999999	0.755073	0.999999	2.58817	0.999999	0.803222	0.999999	86.3801	0.999999	45.0437	0.999999
0.561805	0.999999	2.58848	0.999999	0.755093	0.999999	2.58848	0.999999	0.803229	0.999999	86.4051	0.999999	45.0483	0.999999
0.561836	0.999999	2.58853	0.999999	0.755104	0.999999	2.58853	0.999999	0.803259	0.999999	86.4102	0.999999	45.0762	0.999999
0.561845	0.999999	2.5886	0.999999	0.755163	0.999999	2.5886	0.999999	0.803264	0.999999	86.4646	0.999999	45.096	0.999999
0.562347	0.999999	2.58937	0.999999	0.75518	0.999999	2.58937	0.999999	0.803297	0.999999	86.4653	0.999999	45.1035	0.999999
0.562411	0.999999	2.58978	0.999999	0.755186	0.999999	2.58978	0.999999	0.803304	0.999999	86.4655	0.999999	45.1046	0.999999
0.562775	0.999999	2.58989	0.999999	0.755193	0.999999	2.58989	0.999999	0.803305	0.999999	86.496	0.999999	45.1237	0.999999
0.562914	0.999999	2.58991	0.999999	0.755204	0.999999	2.58991	0.999999	0.803322	0.999999	86.5123	0.999999	45.126	0.999999
0.563236	0.999999	2.59027	0.999999	0.755214	0.999999	2.59027	0.999999	0.803371	0.999999	86.5176	0.999999	45.1378	0.999999
0.563636	0.999999	2.59068	0.999999	0.755305	0.999999	2.59068	0.999999	0.803455	0.999999	86.5425	0.999999	45.1535	0.999999
0.563876	0.999999	2.59115	0.999999	0.755441	0.999999	2.59115	0.999999	0.80346	0.999999	86.5503	0.999999	45.1594	0.999999
0.565046	0.999999	2.59155	0.999999	0.75558	0.999999	2.59155	0.999999	0.803489	0.999999	86.6073	0.999999	45.1665	0.999999
0.565418	0.999999	2.59155	0.999999	0.7556	0.999999	2.59155	0.999999	0.803519	0.999999	86.6264	0.999999	45.1933	0.999999
0.565546	0.999999	2.59175	0.999999	0.755603	0.999999	2.59175	0.999999	0.803562	0.999999	86.6492	0.999999	45.2033	0.999999
0.565784	0.999999	2.5919	0.999999	0.755624	0.999999	2.5919	0.999999	0.803572	0.999999	86.6531	0.999999	45.2062	0.999999
0.566254	0.999999	2.59195	0.999999	0.755636	0.999999	2.59195	0.999999	0.803603	0.999999	86.6895	0.999999	45.2148	0.999999
0.566636	0.999999	2.59224	0.999999	0.755694	0.999999	2.59224	0.999999	0.803661	0.999999	86.6987	0.999999	45.2398	0.999999
0.566733	0.999999	2.59236	0.999999	0.755725	0.999999	2.59236	0.999999	0.803685	0.999999	86.6994	0.999999	45.2502	0.999999
0.568292	0.999999	2.59283	0.999999	0.755736	0.999999	2.59283	0.999999	0.80371	0.999999	86.702	0.999999	45.261	0.999999
0.568501	0.999999	2.59286	0.999999	0.75583	0.999999	2.59286	0.999999	0.803742	0.999999	86.7021	0.999999	45.2815	0.999999
0.568535	0.999999	2.59305	0.999999	0.755831	0.999999	2.59305	0.999999	0.803781	0.999999	86.7046	0.999999	45.283	0.999999
0.56905	0.999999	2.59307	0.999999	0.755844	0.999999	2.59307	0.999999	0.803862	0.999999	86.7055	0.999999	45.3186	0.999999
0.569797	0.999999	2.59402	0.999999	0.755856	0.999999	2.59402	0.999999	0.803869	0.999999	86.7726	0.999999	45.3682	0.999999
0.569801	0.999999	2.59454	0.999999	0.755859	0.999999	2.59454	0.999999	0.803899	0.999999	86.7743	0.999999	45.4204	0.999999
0.570001	0.999999	2.59485	0.999999	0.755863	0.999999	2.59485	0.999999	0.803988	0.999999	86.8249	0.999999	45.4817	0.999999
0.570339	0.999999	2.59527	0.999999	0.755895	0.999999	2.59527	0.999999	0.804069	0.999999	86.8295	0.999999	45.504	0.999999
0.570341	0.999999	2.5965	0.999999	0.755909	0.999999	2.5965	0.999999	0.804072	0.999999	86.8484	0.999999	45.551	0.999999
0.571384	0.999999	2.59661	0.999999	0.755917	0.999999	2.59661	0.999999	0.804072	0.999999	86.8533	0.999999	45.5539	0.999999
0.571527	0.999999	2.59701	0.999999	0.756025	0.999999	2.59701	0.999999	0.804079	0.999999	86.8831	0.999999	45.5573	0.999999
0.571896	0.999999	2.59723	0.999999	0.756107	0.999999	2.59723	0.999999	0.804113	0.999999	86.917	0.999999	45.6309	0.999999
0.572182	0.999999	2.59766	0.999999	0.756132	0.999999	2.59766	0.999999	0.804132	0.999999	86.9233	0.999999	45.653	0.999999
0.573129	0.999999	2.59817	0.999999	0.756133	0.999999	2.59817	0.999999	0.804135	0.999999	86.9251	0.999999	45.6864	0.999999
0.573445	0.999999	2.59881	0.999999	0.75619	0.999999	2.59881	0.999999	0.80415	0.999999	86.931	0.999999	45.6931	0.999999
0.574235	0.999999	2.59892	0.999999	0.756218	0.999999	2.59892	0.999999	0.804171	0.999999	86.937	0.999999	45.6969	0.999999
0.574501	0.999999	2.59896	0.999999	0.75624	0.999999	2.59896	0.999999	0.804222	0.999999	86.9592	0.999999	45.7007	0.999999
0.574649	0.999999	2.59906	0.999999	0.756306	0.999999	2.59906	0.999999	0.804246	0.999999	86.9609	0.999999	45.7144	0.999999
0.574693	0.999999	2.59939	0.999999	0.756335	0.999999	2.59939	0.999999	0.804261	0.999999	86.9742	0.999999	45.7238	0.999999
0.574758	0.999999	2.60005	0.999999	0.756351	0.999999	2.60005	0.999999	0.804327	0.999999	86.9819	0.999999	45.7439	0.999999
0.574864	0.999999	2.60135	0.999999	0.756467	0.999999	2.60135	0.999999	0.80437	0.999999	86.9834	0.999999	45.7976	0.999999
0.575336	0.999999	2.60154	0.999999	0.756506	0.999999	2.60154	0.999999	0.804373	0.999999	86.9977	0.999999	45.8033	0.999999
0.575449	0.999999	2.60156	0.999999	0.756746	0.999999	2.60156	0.999999	0.804385	0.999999	87.0074	0.999999	45.8165	0.999999
0.575469	0.999999	2.60169	0.999999	0.756803	0.999999	2.60169	0.999999	0.804431	0.999999	87.0376	0.999999	45.8166	0.999999
0.575603	0.999999	2.60212	0.999999	0.756825	0.999999	2.60212	0.999999	0.804474	0.999999	87.0671	0.999999	45.833	0.999999
0.575962	0.999999	2.60271	0.999999	0.756875	0.999999	2.60271	0.999999	0.804504	0.999999	87.0723	0.999999	45.8671	0.999999
0.576119	0.999999	2.60305	0.999999	0.756952	0.999999	2.60305	0.999999	0.804538	0.999999	87.111	0.999999	45.8877	0.999999
0.576492	0.999999	2.60318	0.999999	0.756978	0.999999	2.60318	0.999999	0.804574	0.999999	87.1549	0.999999	45.8931	0.999999
0.577167	0.999999	2.60325	0.999999	0.756979	0.999999	2.60325	0.999999	0.804581	0.999999	87.1669	0.999999	45.8989	0.999999
0.577295	0.999999	2.60388	0.999999	0.756995	0.999999	2.60388	0.999999	0.804592	0.999999	87.1706	0.999999	45.9163	0.999999
0.577352	0.999999	2.60398	0.999999	0.757001	0.999999	2.60398	0.999999	0.804627	0.999999	87.1851	0.999999	45.9218	0.999999
0.577751	0.999999	2.60411	0.999999	0.757049	0.999999	2.60411	0.999999	0.804686	0.999999	87.1913	0.999999	45.9374	0.999999
0.577757	0.999999	2.60427	0.999999	0.75705	0.999999	2.60427	0.999999	0.804739	0.999999	87.206	0.999999	45.9444	0.999999
0.577778	0.999999	2.60449	0.999999	0.75708	0.999999	2.60449	0.999999	0.804751	0.999999	87.2769	0.999999	45.958	0.999999
0.577803	0.999999	2.60492	0.999999	0.757096	0.999999	2.60492	0.999999	0.804769	0.999999	87.3477	0.999999	45.9658	0.999999
0.578148	0.999999	2.60567	0.999999	0.757131	0.999999	2.60567	0.999999	0.804776	0.999999	87.354	0.999999	45.993	0.999999
0.578283	0.999999	2.60572	0.999999	0.757152	0.999999	2.60572	0.999999	0.80487	0.999999	87.3579	0.999999	46.0081	0.999999
0.578299	0.999999	2.60573	0.999999	0.757174	0.999999	2.60573	0.999999	0.80488	0.999999	87.3631	0.999999	46.0553	0.999999
0.578402	0.999999	2.60586	0.999999	0.757207	0.999999	2.60586	0.999999	0.804916	0.999999	87.3659	0.999999	46.08	0.999999
0.5785	0.999999	2.6061	0.999999	0.757286	0.999999	2.6061	0.999999	0.804919	0.999999	87.3663	0.999999	46.0874	0.999999
0.578542	0.999999	2.6062	0.999999	0.75729	0.999999	2.6062	0.999999	0.805108	0.999999	87.3728	0.999999	46.1075	0.999999
0.578749	0.999999	2.60637	0.999999	0.757293	0.999999	2.60637	0.999999	0.805127	0.999999	87.3913	0.999999	46.1177	0.999999
0.5788	0.999999	2.60704	0.999999	0.757321	0.999999	2.60704	0.999999	0.805238	0.999999	87.409	0.999999	46.1409	0.999999
0.578934	0.999999	2.60711	0.999999	0.757343	0.999999	2.60711	0.999999	0.805281	0.999999	87.4301	0.999999	46.1423	0.999999
0.579366	0.999999	2.60744	0.999999	0.757346	0.999999	2.60744	0.999999	0.805332	0.999999	87.4557	0.999999	46.1478	0.999999
0.579425	0.999999	2.60776	0.999999	0.757419	0.999999	2.60776	0.999999	0.805361	0.999999	87.4634	0.999999	46.1749	0.999999
0.579528	0.999999	2.60788	0.999999	0.757489	0.999999	2.60788	0.999999	0.805364	0.999999	87.5317	0.999999	46.2621	0.999999
0.58021	0.999999	2.60876	0.999999	0.75753	0.999999	2.60876	0.999999	0.805392	0.999999	87.5387	0.999999	46.2641	0.999999
0.580534	0.999999	2.60905	0.999999	0.757549	0.999999	2.60905	0.999999	0.805464	0.999999	87.5437	0.999999	46.2883	0.999999
0.581038	0.999999	2.60921	0.999999	0.75755	0.999999	2.60921	0.999999	0.805515	0.999999	87.5545	0.999999	46.2975	0.999999
0.581164	0.999999	2.60944	0.999999	0.75756	0.999999	2.60944	0.999999	0.805584	0.999999	87.5741	0.999999	46.3263	0.999999
0.581353	0.999999	2.60981	0.999999	0.757606	0.999999	2.60981	0.999999	0.805599	0.999999	87.575	0.999999	46.3469	0.999999
0.581526	0.999999	2.60985	0.999999	0.757635	0.999999	2.60985	0.999999	0.805655	0.999999	87.5867	0.999999	46.3523	0.999999
0.581552	0.999999	2.61003	0.999999	0.757641	0.999999	2.61003	0.999999	0.805687	0.999999	87.6217	0.999999	46.3558	0.999999
0.581714	0.999999	2.61014	0.999999	0.757703	0.999999	2.61014	0.999999	0.805706	0.999999	87.6384	0.999999	46.3684	0.999999
0.582702	0.999999	2.61016	0.999999	0.757705	0.999999	2.61016	0.999999	0.80571	0.999999	87.6579	0.999999	46.4147	0.999999
0.582907	0.999999	2.61027	0.999999	0.757725	0.999999	2.61027	0.999999	0.805713	0.999999	87.6779	0.999999	46.4825	0.999999
0.583298	0.999999	2.61079	0.999999	0.757795	0.999999	2.61079	0.999999	0.805748	0.999999	87.694	0.999999	46.4899	0.999999
0.583904	0.999999	2.61081	0.999999	0.757803	0.999999	2.61081	0.999999	0.805913	0.999999	87.7506	0.999999	46.5106	0.999999
0.584031	0.999999	2.61087	0.999999	0.757915	0.999999	2.61087	0.999999	0.805929	0.999999	87.7507	0.999999	46.5145	0.999999
0.584082	0.999999	2.61103	0.999999	0.75798	0.999999	2.61103	0.999999	0.805965	0.999999	87.7593	0.999999	46.5253	0.999999
0.585205	0.999999	2.61199	0.999999	0.758013	0.999999	2.61199	0.999999	0.805968	0.999999	87.7624	0.999999	46.5375	0.999999
0.58581	0.999999	2.61209	0.999999	0.75802	0.999999	2.61209	0.999999	0.805996	0.999999	87.7819	0.999999	46.5413	0.999999
0.58588	0.999999	2.61209	0.999999	0.75803	0.999999	2.61209	0.999999	0.806025	0.999999	87.7953	0.999999	46.5596	0.999999
0.585923	0.999999	2.61216	0.999999	0.758047	0.999999	2.61216	0.999999	0.806051	0.999999	87.8067	0.999999	46.6011	0.999999
0.586376	0.999999	2.61265	0.999999	0.758086	0.999999	2.61265	0.999999	0.806121	0.999999	87.8152	0.999999	46.6085	0.999999
0.586431	0.999999	2.61331	0.999999	0.758145	0.999999	2.61331	0.999999	0.806265	0.999999	87.8312	0.999999	46.6206	0.999999
0.587172	0.999999	2.61385	0.999999	0.758147	0.999999	2.61385	0.999999	0.806284	0.999999	87.8903	0.999999	46.6251	0.999999
0.587189	0.999999	2.61409	0.999999	0.758151	0.999999	2.61409	0.999999	0.806305	0.999999	87.9112	0.999999	46.6339	0.999999
0.587266	0.999999	2.61422	0.999999	0.758159	0.999999	2.61422	0.999999	0.806327	0.999999	87.9238	0.999999	46.6408	0.999999
0.587412	0.999999	2.61433	0.999999	0.758179	0.999999	2.61433	0.999999	0.806342	0.999999	87.9255	0.999999	46.6772	0.999999
0.587453	0.999999	2.61454	0.999999	0.758188	0.999999	2.61454	0.999999	0.8064	0.999999	87.9366	0.999999	46.6903	0.999999
0.587818	0.999999	2.61491	0.999999	0.758219	0.999999	2.61491	0.999999	0.806402	0.999999	87.9482	0.999999	46.7059	0.999999
0.58801	0.999999	2.61562	0.999999	0.75823	0.999999	2.61562	0.999999	0.806402	0.999999	87.9526	0.999999	46.7191	0.999999
0.588044	0.999999	2.61621	0.999999	0.758264	0.999999	2.61621	0.999999	0.806417	0.999999	87.9667	0.999999	46.7213	0.999999
0.588045	0.999999	2.61621	0.999999	0.7583	0.999999	2.61621	0.999999	0.806475	0.999999	87.969	0.999999	46.7838	0.999999
0.588242	0.999999	2.61637	0.999999	0.758315	0.999999	2.61637	0.999999	0.806524	0.999999	87.9905	0.999999	46.7868	0.999999
0.588444	0.999999	2.61652	0.999999	0.758342	0.999999	2.61652	0.999999	0.806543	0.999999	88.0007	0.999999	46.7973	0.999999
0.588926	0.999999	2.6167	0.999999	0.758346	0.999999	2.6167	0.999999	0.806574	0.999999	88.0469	0.999999	46.7995	0.999999
0.589317	0.999999	2.61676	0.999999	0.758365	0.999999	2.61676	0.999999	0.806595	0.999999	88.0936	0.999999	46.8132	0.999999
0.589381	0.999999	2.61692	0.999999	0.758381	0.999999	2.61692	0.999999	0.806653	0.999999	88.1045	0.999999	46.8723	0.999999
0.589441	0.999999	2.61702	0.999999	0.758384	0.999999	2.61702	0.999999	0.80666	0.999999	88.1533	0.999999	46.9568	0.999999
0.589562	0.999999	2.61731	0.999999	0.758388	0.999999	2.61731	0.999999	0.806698	0.999999	88.1635	0.999999	46.957	0.999999
0.589588	0.999999	2.6176	0.999999	0.758436	0.999999	2.6176	0.999999	0.806704	0.999999	88.187	0.999999	46.9702	0.999999
0.589934	0.999999	2.61786	0.999999	0.758443	0.999999	2.61786	0.999999	0.806775	0.999999	88.1872	0.999999	46.9725	0.999999
0.590411	0.999999	2.61826	0.999999	0.758451	0.999999	2.61826	0.999999	0.806908	0.999999	88.2012	0.999999	46.9862	0.999999
0.590561	0.999999	2.61866	0.999999	0.758451	0.999999	2.61866	0.999999	0.806908	0.999999	88.2248	0.999999	46.9933	0.999999
0.590781	0.999999	2.61883	0.999999	0.758459	0.999999	2.61883	0.999999	0.806938	0.999999	88.2759	0.999999	47.0405	0.999999
0.591136	0.999999	2.61946	0.999999	0.758558	0.999999	2.61946	0.999999	0.807085	0.999999	88.2839	0.999999	47.0526	0.999999
0.591524	0.999999	2.61987	0.999999	0.758567	0.999999	2.61987	0.999999	0.807114	0.999999	88.2894	0.999999	47.056	0.999999
0.591985	0.999999	2.61989	0.999999	0.758567	0.999999	2.61989	0.999999	0.807141	0.999999	88.3058	0.999999	47.0565	0.999999
0.592269	0.999999	2.61993	0.999999	0.758572	0.999999	2.61993	0.999999	0.807196	0.999999	88.3216	0.999999	47.0588	0.999999
0.593178	0.999999	2.62026	0.999999	0.758574	0.999999	2.62026	0.999999	0.807211	0.999999	88.3478	0.999999	47.0636	0.999999
0.593248	0.999999	2.62037	0.999999	0.758605	0.999999	2.62037	0.999999	0.80725	0.999999	88.3563	0.999999	47.0677	0.999999
0.593273	0.999999	2.62061	0.999999	0.758648	0.999999	2.62061	0.999999	0.807256	0.999999	88.3891	0.999999	47.0946	0.999999
0.593621	0.999999	2.62082	0.999999	0.758715	0.999999	2.62082	0.999999	0.807409	0.999999	88.4358	0.999999	47.1112	0.999999
0.59363	0.999999	2.62102	0.999999	0.75873	0.999999	2.62102	0.999999	0.807413	0.999999	88.4451	0.999999	47.1142	0.999999
0.593639	0.999999	2.62106	0.999999	0.758753	0.999999	2.62106	0.999999	0.807481	0.999999	88.4532	0.999999	47.1491	0.999999
0.594027	0.999999	2.62108	0.999999	0.758801	0.999999	2.62108	0.999999	0.807526	0.999999	88.4635	0.999999	47.1586	0.999999
0.594179	0.999999	2.6218	0.999999	0.758818	0.999999	2.6218	0.999999	0.807526	0.999999	88.5168	0.999999	47.1924	0.999999
0.5947	0.999999	2.6225	0.999999	0.758845	0.999999	2.6225	0.999999	0.807534	0.999999	88.5273	0.999999	47.2199	0.999999
0.594908	0.999999	2.62255	0.999999	0.758873	0.999999	2.62255	0.999999	0.807554	0.999999	88.5571	0.999999	47.2352	0.999999
0.595042	0.999999	2.62303	0.999999	0.758891	0.999999	2.62303	0.999999	0.807574	0.999999	88.573	0.999999	47.2367	0.999999
0.595101	0.999999	2.62318	0.999999	0.75891	0.999999	2.62318	0.999999	0.807589	0.999999	88.5841	0.999999	47.25	0.999999
0.595299	0.999999	2.62323	0.999999	0.758911	0.999999	2.62323	0.999999	0.807601	0.999999	88.625	0.999999	47.263	0.999999
0.595572	0.999999	2.62395	0.999999	0.758922	0.999999	2.62395	0.999999	0.807659	0.999999	88.6461	0.999999	47.2936	0.999999
0.595646	0.999999	2.62411	0.999999	0.758935	0.999999	2.62411	0.999999	0.807671	0.999999	88.6518	0.999999	47.3197	0.999999
0.595771	0.999999	2.62421	0.999999	0.758936	0.999999	2.62421	0.999999	0.807736	0.999999	88.6605	0.999999	47.3724	0.999999
0.596841	0.999999	2.62453	0.999999	0.758959	0.999999	2.62453	0.999999	0.807826	0.999999	88.6756	0.999999	47.3894	0.999999
0.59687	0.999999	2.62457	0.999999	0.758962	0.999999	2.62457	0.999999	0.80785	0.999999	88.6859	0.999999	47.3894	0.999999
0.597116	0.999999	2.62467	0.999999	0.758963	0.999999	2.62467	0.999999	0.807851	0.999999	88.6892	0.999999	47.3987	0.999999
0.597166	0.999999	2.62495	0.999999	0.758974	0.999999	2.62495	0.999999	0.807924	0.999999	88.7769	0.999999	47.4052	0.999999
0.597284	0.999999	2.6255	0.999999	0.759016	0.999999	2.6255	0.999999	0.807938	0.999999	88.7773	0.999999	47.4377	0.999999
0.597616	0.999999	2.62578	0.999999	0.759026	0.999999	2.62578	0.999999	0.807975	0.999999	88.7924	0.999999	47.4481	0.999999
0.59805	0.999999	2.62593	0.999999	0.759027	0.999999	2.62593	0.999999	0.808009	0.999999	88.8364	0.999999	47.4543	0.999999
0.59806	0.999999	2.62605	0.999999	0.759044	0.999999	2.62605	0.999999	0.808015	0.999999	88.8741	0.999999	47.4645	0.999999
0.598276	0.999999	2.62621	0.999999	0.759061	0.999999	2.62621	0.999999	0.808025	0.999999	88.8952	0.999999	47.4808	0.999999
0.598395	0.999999	2.62644	0.999999	0.759077	0.999999	2.62644	0.999999	0.808072	0.999999	88.9187	0.999999	47.5198	0.999999
0.598502	0.999999	2.6265	0.999999	0.759102	0.999999	2.6265	0.999999	0.808092	0.999999	88.9218	0.999999	47.5384	0.999999
0.59859	0.999999	2.62653	0.999999	0.759109	0.999999	2.62653	0.999999	0.808236	0.999999	88.9405	0.999999	47.5647	0.999999
0.598693	0.999999	2.62675	0.999999	0.759116	0.999999	2.62675	0.999999	0.808291	0.999999	88.9553	0.999999	47.5791	0.999999
0.599149	0.999999	2.62677	0.999999	0.759147	0.999999	2.62677	0.999999	0.808359	0.999999	88.9834	0.999999	47.6111	0.999999
0.599267	0.999999	2.6272	0.999999	0.759159	0.999999	2.6272	0.999999	0.80841	0.999999	89.0048	0.999999	47.6254	0.999999
0.599387	0.999999	2.62721	0.999999	0.759184	0.999999	2.62721	0.999999	0.808443	0.999999	89.01	0.999999	47.6374	0.999999
0.600078	0.999999	2.62728	0.999999	0.759189	0.999999	2.62728	0.999999	0.808464	0.999999	89.0108	0.999999	47.6678	0.999999
0.600103	0.999999	2.62763	0.999999	0.759198	0.999999	2.62763	0.999999	0.808469	0.999999	89.025	0.999999	47.6798	0.999999
0.600123	0.999999	2.62772	0.999999	0.759208	0.999999	2.62772	0.999999	0.808504	0.999999	89.0303	0.999999	47.6838	0.999999
0.600178	0.999999	2.6278	0.999999	0.759228	0.999999	2.6278	0.999999	0.808568	0.999999	89.0311	0.999999	47.7116	0.999999
0.600334	0.999999	2.62783	0.999999	0.759235	0.999999	2.62783	0.999999	0.808568	0.999999	89.055	0.999999	47.7278	0.999999
0.600352	0.999999	2.62791	0.999999	0.759249	0.999999	2.62791	0.999999	0.808644	0.999999	89.0849	0.999999	47.7354	0.999999
0.601124	0.999999	2.62794	0.999999	0.759249	0.999999	2.62794	0.999999	0.808659	0.999999	89.1646	0.999999	47.8001	0.999999
0.601363	0.999999	2.62819	0.999999	0.759251	0.999999	2.62819	0.999999	0.808686	0.999999	89.2119	0.999999	47.8194	0.999999
0.601624	0.999999	2.62879	0.999999	0.759271	0.999999	2.62879	0.999999	0.8087	0.999999	89.2239	0.999999	47.8288	0.999999
0.60169	0.999999	2.62888	0.999999	0.75928	0.999999	2.62888	0.999999	0.808723	0.999999	89.2305	0.999999	47.843	0.999999
0.602099	0.999999	2.62935	0.999999	0.759311	0.999999	2.62935	0.999999	0.808755	0.999999	89.2513	0.999999	47.8521	0.999999
0.602226	0.999999	2.62954	0.999999	0.75938	0.999999	2.62954	0.999999	0.808764	0.999999	89.2906	0.999999	47.862	0.999999
0.60292	0.999999	2.62965	0.999999	0.759402	0.999999	2.62965	0.999999	0.808774	0.999999	89.3143	0.999999	47.8831	0.999999
0.603242	0.999999	2.63002	0.999999	0.759413	0.999999	2.63002	0.999999	0.808917	0.999999	89.3226	0.999999	47.885	0.999999
0.603436	0.999999	2.63006	0.999999	0.759437	0.999999	2.63006	0.999999	0.808928	0.999999	89.3586	0.999999	47.8968	0.999999
0.603698	0.999999	2.63028	0.999999	0.759444	0.999999	2.63028	0.999999	0.80898	0.999999	89.3722	0.999999	47.9018	0.999999
0.603863	0.999999	2.63053	0.999999	0.759449	0.999999	2.63053	0.999999	0.809018	0.999999	89.3742	0.999999	47.9097	0.999999
0.604016	0.999999	2.63082	0.999999	0.759461	0.999999	2.63082	0.999999	0.80902	0.999999	89.3779	0.999999	47.9109	0.999999
0.604241	0.999999	2.63105	0.999999	0.759498	0.999999	2.63105	0.999999	0.80903	0.999999	89.3933	0.999999	47.9232	0.999999
0.604625	0.999999	2.63138	0.999999	0.7595	0.999999	2.63138	0.999999	0.809044	0.999999	89.4219	0.999999	47.9406	0.999999
0.6047	0.999999	2.63141	0.999999	0.759501	0.999999	2.63141	0.999999	0.809054	0.999999	89.4311	0.999999	47.9651	0.999999
0.604968	0.999999	2.63143	0.999999	0.759512	0.999999	2.63143	0.999999	0.809151	0.999999	89.4578	0.999999	47.9866	0.999999
0.605202	0.999999	2.63144	0.999999	0.759524	0.999999	2.63144	0.999999	0.809265	0.999999	89.4691	0.999999	48.0007	0.999999
0.605238	0.999999	2.63176	0.999999	0.759551	0.999999	2.63176	0.999999	0.809322	0.999999	89.4818	0.999999	48.0227	0.999999
0.605694	0.999999	2.63183	0.999999	0.759611	0.999999	2.63183	0.999999	0.809397	0.999999	89.5369	0.999999	48.0289	0.999999
0.605832	0.999999	2.63238	0.999999	0.759623	0.999999	2.63238	0.999999	0.8094	0.999999	89.5424	0.999999	48.0398	0.999999
0.606204	0.999999	2.63253	0.999999	0.759625	0.999999	2.63253	0.999999	0.809454	0.999999	89.5473	0.999999	48.0899	0.999999
0.606643	0.999999	2.63262	0.999999	0.759642	0.999999	2.63262	0.999999	0.809486	0.999999	89.5485	0.999999	48.1054	0.999999
0.606902	0.999999	2.63277	0.999999	0.759682	0.999999	2.63277	0.999999	0.809489	0.999999	89.5671	0.999999	48.1189	0.999999
0.607087	0.999999	2.63295	0.999999	0.759712	0.999999	2.63295	0.999999	0.809502	0.999999	89.5734	0.999999	48.1278	0.999999
0.607134	0.999999	2.6333	0.999999	0.759713	0.999999	2.6333	0.999999	0.80951	0.999999	89.6009	0.999999	48.1439	0.999999
0.607278	0.999999	2.63348	0.999999	0.759714	0.999999	2.63348	0.999999	0.809511	0.999999	89.6105	0.999999	48.1765	0.999999
0.607552	0.999999	2.63358	0.999999	0.759724	0.999999	2.63358	0.999999	0.80954	0.999999	89.6137	0.999999	48.1791	0.999999
0.60804	0.999999	2.63373	0.999999	0.759738	0.999999	2.63373	0.999999	0.809575	0.999999	89.6211	0.999999	48.2162	0.999999
0.608207	0.999999	2.63391	0.999999	0.75975	0.999999	2.63391	0.999999	0.809669	0.999999	89.6331	0.999999	48.221	0.999999
0.608491	0.999999	2.63415	0.999999	0.759753	0.999999	2.63415	0.999999	0.809688	0.999999	89.6524	0.999999	48.2534	0.999999
0.608884	0.999999	2.63423	0.999999	0.759765	0.999999	2.63423	0.999999	0.809807	0.999999	89.6867	0.999999	48.2581	0.999999
0.609034	0.999999	2.63429	0.999999	0.759772	0.999999	2.63429	0.999999	0.809809	0.999999	89.7113	0.999999	48.2591	0.999999
0.609306	0.999999	2.6348	0.999999	0.759772	0.999999	2.6348	0.999999	0.809888	0.999999	89.7115	0.999999	48.297	0.999999
0.609515	0.999999	2.63513	0.999999	0.759778	0.999999	2.63513	0.999999	0.809972	0.999999	89.751	0.999999	48.3168	0.999999
0.610081	0.999999	2.63586	0.999999	0.759779	0.999999	2.63586	0.999999	0.810031	0.999999	89.7514	0.999999	48.3181	0.999999
0.610118	0.999999	2.63591	0.999999	0.759782	0.999999	2.63591	0.999999	0.810054	0.999999	89.7726	0.999999	48.3451	0.999999
0.610692	0.999999	2.63613	0.999999	0.759808	0.999999	2.63613	0.999999	0.810106	0.999999	89.7811	0.999999	48.3572	0.999999
0.610696	0.999999	2.6368	0.999999	0.759817	0.999999	2.6368	0.999999	0.810107	0.999999	89.7863	0.999999	48.4061	0.999999
0.610799	0.999999	2.63734	0.999999	0.759822	0.999999	2.63734	0.999999	0.810109	0.999999	89.8548	0.999999	48.4232	0.999999
0.610868	0.999999	2.6374	0.999999	0.759825	0.999999	2.6374	0.999999	0.81012	0.999999	89.8715	0.999999	48.4352	0.999999
0.611032	0.999999	2.63758	0.999999	0.75983	0.999999	2.63758	0.999999	0.810136	0.999999	89.884	0.999999	48.4563	0.999999
0.611103	0.999999	2.63761	0.999999	0.759835	0.999999	2.63761	0.999999	0.810145	0.999999	89.9027	0.999999	48.4704	0.999999
0.611414	0.999999	2.63771	0.999999	0.759848	0.999999	2.63771	0.999999	0.810145	0.999999	89.942	0.999999	48.4874	0.999999
0.612559	0.999999	2.63791	0.999999	0.759874	0.999999	2.63791	0.999999	0.810179	0.999999	89.9651	0.999999	48.5023	0.999999
0.612686	0.999999	2.63816	0.999999	0.759879	0.999999	2.63816	0.999999	0.8102	0.999999	89.9823	0.999999	48.5252	0.999999
0.612788	0.999999	2.63828	0.999999	0.759881	0.999999	2.63828	0.999999	0.810206	0.999999	89.9922	0.999999	48.5335	0.999999
0.612828	0.999999	2.63835	0.999999	0.759909	0.999999	2.63835	0.999999	0.81022	0.999999	90.0112	0.999999	48.5468	0.999999
0.613583	0.999999	2.63861	0.999999	0.759931	0.999999	2.63861	0.999999	0.810228	0.999999	90.0362	0.999999	48.5489	0.999999
0.613655	0.999999	2.63881	0.999999	0.75996	0.999999	2.63881	0.999999	0.810273	0.999999	90.0697	0.999999	48.5544	0.999999
0.61374	0.999999	2.63932	0.999999	0.759987	0.999999	2.63932	0.999999	0.810279	0.999999	90.0768	0.999999	48.5552	0.999999
0.614428	0.999999	2.63953	0.999999	0.759993	0.999999	2.63953	0.999999	0.810284	0.999999	90.0822	0.999999	48.5578	0.999999
0.614563	0.999999	2.63964	0.999999	0.759996	0.999999	2.63964	0.999999	0.810301	0.999999	90.0829	0.999999	48.5846	0.999999
0.614837	0.999999	2.63981	0.999999	0.760009	0.999999	2.63981	0.999999	0.810328	0.999999	90.1651	0.999999	48.6016	0.999999
0.614893	0.999999	2.6399	0.999999	0.760022	0.999999	2.6399	0.999999	0.810351	0.999999	90.2072	0.999999	48.6042	0.999999
0.615085	0.999999	2.63999	0.999999	0.76003	0.999999	2.63999	0.999999	0.810368	0.999999	90.2133	0.999999	48.6315	0.999999
0.615427	0.999999	2.64006	0.999999	0.760034	0.999999	2.64006	0.999999	0.810372	0.999999	90.2156	0.999999	48.6483	0.999999
0.615828	0.999999	2.64009	0.999999	0.760042	0.999999	2.64009	0.999999	0.810376	0.999999	90.2493	0.999999	48.7135	0.999999
0.616064	0.999999	2.64029	0.999999	0.760046	0.999999	2.64029	0.999999	0.810378	0.999999	90.2629	0.999999	48.72	0.999999
0.616313	0.999999	2.64073	0.999999	0.760069	0.999999	2.64073	0.999999	0.810421	0.999999	90.2662	0.999999	48.7211	0.999999
0.616498	0.999999	2.64091	0.999999	0.760069	0.999999	2.64091	0.999999	0.810522	0.999999	90.3179	0.999999	48.7504	0.999999
0.616771	0.999999	2.64117	0.999999	0.760074	0.999999	2.64117	0.999999	0.810576	0.999999	90.3359	0.999999	48.7621	0.999999
0.617313	0.999999	2.64147	0.999999	0.760089	0.999999	2.64147	0.999999	0.810579	0.999999	90.3444	0.999999	48.7688	0.999999
0.617545	0.999999	2.64163	0.999999	0.760109	0.999999	2.64163	0.999999	0.810598	0.999999	90.349	0.999999	48.7791	0.999999
0.617618	0.999999	2.64172	0.999999	0.76012	0.999999	2.64172	0.999999	0.810618	0.999999	90.3793	0.999999	48.788	0.999999
0.617798	0.999999	2.64178	0.999999	0.760133	0.999999	2.64178	0.999999	0.810627	0.999999	90.3849	0.999999	48.8237	0.999999
0.617964	0.999999	2.64198	0.999999	0.760147	0.999999	2.64198	0.999999	0.810669	0.999999	90.395	0.999999	48.8636	0.999999
0.618189	0.999999	2.64217	0.999999	0.760165	0.999999	2.64217	0.999999	0.810681	0.999999	90.4059	0.999999	48.8707	0.999999
0.61837	0.999999	2.6424	0.999999	0.760181	0.999999	2.6424	0.999999	0.810704	0.999999	90.4284	0.999999	48.8724	0.999999
0.618712	0.999999	2.64246	0.999999	0.760186	0.999999	2.64246	0.999999	0.810715	0.999999	90.4372	0.999999	48.8976	0.999999
0.61916	0.999999	2.64249	0.999999	0.760224	0.999999	2.64249	0.999999	0.810744	0.999999	90.4731	0.999999	48.8987	0.999999
0.619167	0.999999	2.64313	0.999999	0.760258	0.999999	2.64313	0.999999	0.810829	0.999999	90.5	0.999999	48.9009	0.999999
0.619239	0.999999	2.64399	0.999999	0.760269	0.999999	2.64399	0.999999	0.810893	0.999999	90.5185	0.999999	48.9222	0.999999
0.619792	0.999999	2.644	0.999999	0.760281	0.999999	2.644	0.999999	0.810896	0.999999	90.5287	0.999999	48.9324	0.999999
0.619978	0.999999	2.64408	0.999999	0.76029	0.999999	2.64408	0.999999	0.810941	0.999999	90.5474	0.999999	48.9367	0.999999
0.620218	0.999999	2.64419	0.999999	0.760305	0.999999	2.64419	0.999999	0.81101	0.999999	90.5719	0.999999	48.9658	0.999999
0.620224	0.999999	2.64474	0.999999	0.760314	0.999999	2.64474	0.999999	0.811021	0.999999	90.6497	0.999999	48.9676	0.999999
0.620226	0.999999	2.64481	0.999999	0.760349	0.999999	2.64481	0.999999	0.81103	0.999999	90.664	0.999999	48.9683	0.999999
0.620395	0.999999	2.64491	0.999999	0.760368	0.999999	2.64491	0.999999	0.811036	0.999999	90.691	0.999999	48.9767	0.999999
0.620417	0.999999	2.64504	0.999999	0.760382	0.999999	2.64504	0.999999	0.811042	0.999999	90.7259	0.999999	49.0084	0.999999
0.620464	0.999999	2.64509	0.999999	0.760384	0.999999	2.64509	0.999999	0.811062	0.999999	90.7336	0.999999	49.0342	0.999999
0.620609	0.999999	2.64524	0.999999	0.760395	0.999999	2.64524	0.999999	0.811117	0.999999	90.7523	0.999999	49.0374	0.999999
0.620666	0.999999	2.64558	0.999999	0.760414	0.999999	2.64558	0.999999	0.811173	0.999999	90.7537	0.999999	49.0397	0.999999
0.620896	0.999999	2.64586	0.999999	0.760431	0.999999	2.64586	0.999999	0.811179	0.999999	90.7781	0.999999	49.042	0.999999
0.621537	0.999999	2.64594	0.999999	0.760437	0.999999	2.64594	0.999999	0.811231	0.999999	90.8065	0.999999	49.0559	0.999999
0.621684	0.999999	2.64599	0.999999	0.760445	0.999999	2.64599	0.999999	0.81136	0.999999	90.8158	0.999999	49.0896	0.999999
0.621913	0.999999	2.64604	0.999999	0.760451	0.999999	2.64604	0.999999	0.811417	0.999999	90.8513	0.999999	49.1126	0.999999
0.622068	0.999999	2.64631	0.999999	0.760471	0.999999	2.64631	0.999999	0.811426	0.999999	90.8594	0.999999	49.1518	0.999999
0.622643	0.999999	2.64636	0.999999	0.760475	0.999999	2.64636	0.999999	0.811432	0.999999	90.8673	0.999999	49.1562	0.999999
0.622719	0.999999	2.64638	0.999999	0.7605	0.999999	2.64638	0.999999	0.81146	0.999999	90.8968	0.999999	49.183	0.999999
0.622968	0.999999	2.64644	0.999999	0.76051	0.999999	2.64644	0.999999	0.8115	0.999999	90.9132	0.999999	49.1925	0.999999
0.623182	0.999999	2.64653	0.999999	0.760512	0.999999	2.64653	0.999999	0.811523	0.999999	90.9714	0.999999	49.1989	0.999999
0.623469	0.999999	2.64674	0.999999	0.760536	0.999999	2.64674	0.999999	0.811527	0.999999	90.9726	0.999999	49.2071	0.999999
0.623768	0.999999	2.6468	0.999999	0.760537	0.999999	2.6468	0.999999	0.811528	0.999999	90.9785	0.999999	49.2089	0.999999
0.624078	0.999999	2.64681	0.999999	0.760539	0.999999	2.64681	0.999999	0.811528	0.999999	90.9998	0.999999	49.2286	0.999999
0.624523	0.999999	2.64733	0.999999	0.760551	0.999999	2.64733	0.999999	0.811542	0.999999	91.0481	0.999999	49.3026	0.999999
0.624545	0.999999	2.64758	0.999999	0.760576	0.999999	2.64758	0.999999	0.811551	0.999999	91.0547	0.999999	49.3061	0.999999
0.624608	0.999999	2.64769	0.999999	0.760612	0.999999	2.64769	0.999999	0.811586	0.999999	91.0576	0.999999	49.3204	0.999999
0.625135	0.999999	2.64796	0.999999	0.760617	0.999999	2.64796	0.999999	0.811607	0.999999	91.0934	0.999999	49.3255	0.999999
0.625651	0.999999	2.64833	0.999999	0.760639	0.999999	2.64833	0.999999	0.811618	0.999999	91.0968	0.999999	49.3265	0.999999
0.625686	0.999999	2.64862	0.999999	0.76064	0.999999	2.64862	0.999999	0.81162	0.999999	91.1223	0.999999	49.3356	0.999999
0.625823	0.999999	2.64876	0.999999	0.760643	0.999999	2.64876	0.999999	0.811677	0.999999	91.1663	0.999999	49.3521	0.999999
0.626257	0.999999	2.64915	0.999999	0.760646	0.999999	2.64915	0.999999	0.811728	0.999999	91.1874	0.999999	49.3794	0.999999
0.626461	0.999999	2.64917	0.999999	0.760658	0.999999	2.64917	0.999999	0.811751	0.999999	91.1989	0.999999	49.3909	0.999999
0.626915	0.999999	2.64925	0.999999	0.760659	0.999999	2.64925	0.999999	0.811779	0.999999	91.2113	0.999999	49.3973	0.999999
0.627163	0.999999	2.64948	0.999999	0.760667	0.999999	2.64948	0.999999	0.81179	0.999999	91.2169	0.999999	49.4014	0.999999
0.627195	0.999999	2.64951	0.999999	0.760669	0.999999	2.64951	0.999999	0.811805	0.999999	91.233	0.999999	49.4036	0.999999
0.627243	0.999999	2.64978	0.999999	0.76068	0.999999	2.64978	0.999999	0.811819	0.999999	91.278	0.999999	49.4211	0.999999
0.627321	0.999999	2.64984	0.999999	0.760709	0.999999	2.64984	0.999999	0.81186	0.999999	91.2791	0.999999	49.4375	0.999999
0.627396	0.999999	2.6501	0.999999	0.760713	0.999999	2.6501	0.999999	0.811866	0.999999	91.2982	0.999999	49.4441	0.999999
0.628589	0.999999	2.65021	0.999999	0.76073	0.999999	2.65021	0.999999	0.811875	0.999999	91.3149	0.999999	49.4901	0.999999
0.628683	0.999999	2.65023	0.999999	0.760741	0.999999	2.65023	0.999999	0.811931	0.999999	91.3205	0.999999	49.4972	0.999999
0.629298	0.999999	2.65071	0.999999	0.76075	0.999999	2.65071	0.999999	0.811934	0.999999	91.3262	0.999999	49.5059	0.999999
0.629636	0.999999	2.65089	0.999999	0.760758	0.999999	2.65089	0.999999	0.811938	0.999999	91.3271	0.999999	49.5082	0.999999
0.629644	0.999999	2.65149	0.999999	0.76076	0.999999	2.65149	0.999999	0.811942	0.999999	91.3297	0.999999	49.5182	0.999999
0.630987	0.999999	2.652	0.999999	0.760764	0.999999	2.652	0.999999	0.811959	0.999999	91.3928	0.999999	49.5227	0.999999
0.631116	0.999999	2.65226	0.999999	0.760785	0.999999	2.65226	0.999999	0.811969	0.999999	91.4049	0.999999	49.5237	0.999999
0.631302	0.999999	2.65247	0.999999	0.760789	0.999999	2.65247	0.999999	0.811991	0.999999	91.4164	0.999999	49.5463	0.999999
0.631383	0.999999	2.65268	0.999999	0.760794	0.999999	2.65268	0.999999	0.81203	0.999999	91.4267	0.999999	49.5589	0.999999
0.63152	0.999999	2.65268	0.999999	0.760801	0.999999	2.65268	0.999999	0.812035	0.999999	91.4463	0.999999	49.5702	0.999999
0.631531	0.999999	2.65283	0.999999	0.760809	0.999999	2.65283	0.999999	0.812042	0.999999	91.4558	0.999999	49.5716	0.999999
0.63164	0.999999	2.65296	0.999999	0.760811	0.999999	2.65296	0.999999	0.812098	0.999999	91.4621	0.999999	49.5974	0.999999
0.632601	0.999999	2.65304	0.999999	0.760821	0.999999	2.65304	0.999999	0.812145	0.999999	91.4815	0.999999	49.5984	0.999999
0.632833	0.999999	2.65306	0.999999	0.760844	0.999999	2.65306	0.999999	0.812231	0.999999	91.5008	0.999999	49.6138	0.999999
0.632914	0.999999	2.65343	0.999999	0.760852	0.999999	2.65343	0.999999	0.812326	0.999999	91.566	0.999999	49.6158	0.999999
0.633449	0.999999	2.65349	0.999999	0.760879	0.999999	2.65349	0.999999	0.812328	0.999999	91.5747	0.999999	49.6404	0.999999
0.633659	0.999999	2.65356	0.999999	0.760884	0.999999	2.65356	0.999999	0.812361	0.999999	91.5903	0.999999	49.7089	0.999999
0.633734	0.999999	2.65359	0.999999	0.760947	0.999999	2.65359	0.999999	0.812378	0.999999	91.6106	0.999999	49.7427	0.999999
0.633831	0.999999	2.65362	0.999999	0.760951	0.999999	2.65362	0.999999	0.812444	0.999999	91.6162	0.999999	49.7589	0.999999
0.63414	0.999999	2.65368	0.999999	0.760957	0.999999	2.65368	0.999999	0.812494	0.999999	91.6212	0.999999	49.78	0.999999
0.634575	0.999999	2.65375	0.999999	0.76096	0.999999	2.65375	0.999999	0.812694	0.999999	91.707	0.999999	49.7826	0.999999
0.634767	0.999999	2.65406	0.999999	0.760967	0.999999	2.65406	0.999999	0.812789	0.999999	91.7242	0.999999	49.7865	0.999999
0.635079	0.999999	2.65409	0.999999	0.761004	0.999999	2.65409	0.999999	0.812844	0.999999	91.7277	0.999999	49.8028	0.999999
0.635381	0.999999	2.65421	0.999999	0.761016	0.999999	2.65421	0.999999	0.812849	0.999999	91.7307	0.999999	49.8064	0.999999
0.635547	0.999999	2.65441	0.999999	0.761033	0.999999	2.65441	0.999999	0.812856	0.999999	91.7446	0.999999	49.8142	0.999999
0.635744	0.999999	2.65468	0.999999	0.761049	0.999999	2.65468	0.999999	0.81287	0.999999	91.7589	0.999999	49.8145	0.999999
0.635969	0.999999	2.65482	0.999999	0.76106	0.999999	2.65482	0.999999	0.812878	0.999999	91.7641	0.999999	49.8515	0.999999
0.636282	0.999999	2.65486	0.999999	0.761083	0.999999	2.65486	0.999999	0.812884	0.999999	91.781	0.999999	49.8665	0.999999
0.636468	0.999999	2.65502	0.999999	0.761085	0.999999	2.65502	0.999999	0.812969	0.999999	91.7818	0.999999	49.8851	0.999999
0.636572	0.999999	2.65515	0.999999	0.761126	0.999999	2.65515	0.999999	0.812983	0.999999	91.7952	0.999999	49.8916	0.999999
0.636586	0.999999	2.65598	0.999999	0.761177	0.999999	2.65598	0.999999	0.813024	0.999999	91.8263	0.999999	49.8926	0.999999
0.636733	0.999999	2.65625	0.999999	0.761178	0.999999	2.65625	0.999999	0.813043	0.999999	91.897	0.999999	49.8939	0.999999
0.637146	0.999999	2.65671	0.999999	0.76131	0.999999	2.65671	0.999999	0.813048	0.999999	91.9088	0.999999	49.9088	0.999999
0.637246	0.999999	2.65673	0.999999	0.761311	0.999999	2.65673	0.999999	0.813066	0.999999	91.912	0.999999	49.9103	0.999999
0.637316	0.999999	2.6568	0.999999	0.76136	0.999999	2.6568	0.999999	0.813068	0.999999	91.9214	0.999999	49.9139	0.999999
0.637681	0.999999	2.65683	0.999999	0.761393	0.999999	2.65683	0.999999	0.813084	0.999999	91.9259	0.999999	49.9257	0.999999
0.637874	0.999999	2.65717	0.999999	0.76141	0.999999	2.65717	0.999999	0.8131	0.999999	91.9421	0.999999	49.9587	0.999999
0.638238	0.999999	2.65731	0.999999	0.761421	0.999999	2.65731	0.999999	0.813212	0.999999	91.9921	0.999999	49.9624	0.999999
0.638283	0.999999	2.65762	0.999999	0.761431	0.999999	2.65762	0.999999	0.813213	0.999999	92.0242	0.999999	49.9698	0.999999
0.638634	0.999999	2.65768	0.999999	0.761455	0.999999	2.65768	0.999999	0.813215	0.999999	92.0281	0.999999	49.9718	0.999999
0.638697	0.999999	2.65768	0.999999	0.761489	0.999999	2.65768	0.999999	0.813231	0.999999	92.0399	0.999999	49.9838	0.999999
0.63872	0.999999	2.65799	0.999999	0.761491	0.999999	2.65799	0.999999	0.813286	0.999999	92.048	0.999999	49.9979	0.999999
0.638738	0.999999	2.65936	0.999999	0.761495	0.999999	2.65936	0.999999	0.813287	0.999999	92.0841	0.999999	50.0211	0.999999
0.639175	0.999999	2.65951	0.999999	0.761505	0.999999	2.65951	0.999999	0.813327	0.999999	92.0967	0.999999	50.0348	0.999999
0.639216	0.999999	2.65969	0.999999	0.761516	0.999999	2.65969	0.999999	0.813351	0.999999	92.1858	0.999999	50.0413	0.999999
0.639309	0.999999	2.65986	0.999999	0.76152	0.999999	2.65986	0.999999	0.813351	0.999999	92.2026	0.999999	50.0418	0.999999
0.639652	0.999999	2.66044	0.999999	0.761542	0.999999	2.66044	0.999999	0.813353	0.999999	92.2107	0.999999	50.0546	0.999999
0.639679	0.999999	2.66065	0.999999	0.761544	0.999999	2.66065	0.999999	0.813376	0.999999	92.2794	0.999999	50.0561	0.999999
0.639954	0.999999	2.66067	0.999999	0.761551	0.999999	2.66067	0.999999	0.813399	0.999999	92.2851	0.999999	50.0602	0.999999
0.640031	0.999999	2.66074	0.999999	0.761573	0.999999	2.66074	0.999999	0.813445	0.999999	92.3419	0.999999	50.0603	0.999999
0.640385	0.999999	2.66089	0.999999	0.761608	0.999999	2.66089	0.999999	0.813453	0.999999	92.349	0.999999	50.0846	0.999999
0.640672	0.999999	2.66095	0.999999	0.761615	0.999999	2.66095	0.999999	0.813484	0.999999	92.3589	0.999999	50.0849	0.999999
0.64073	0.999999	2.66164	0.999999	0.761616	0.999999	2.66164	0.999999	0.813485	0.999999	92.3655	0.999999	50.1985	0.999999
0.641462	0.999999	2.66168	0.999999	0.761617	0.999999	2.66168	0.999999	0.813493	0.999999	92.3705	0.999999	50.1994	0.999999
0.641675	0.999999	2.6618	0.999999	0.761671	0.999999	2.6618	0.999999	0.813522	0.999999	92.3745	0.999999	50.2066	0.999999
0.641892	0.999999	2.6619	0.999999	0.761706	0.999999	2.6619	0.999999	0.813541	0.999999	92.4139	0.999999	50.2275	0.999999
0.642247	0.999999	2.66198	0.999999	0.761713	0.999999	2.66198	0.999999	0.813546	0.999999	92.4428	0.999999	50.2412	0.999999
0.642302	0.999999	2.66204	0.999999	0.761713	0.999999	2.66204	0.999999	0.813582	0.999999	92.4615	0.999999	50.2489	0.999999
0.642343	0.999999	2.66211	0.999999	0.761745	0.999999	2.66211	0.999999	0.813584	0.999999	92.487	0.999999	50.2711	0.999999
0.643085	0.999999	2.66213	0.999999	0.761748	0.999999	2.66213	0.999999	0.813586	0.999999	92.534	0.999999	50.2722	0.999999
0.644029	0.999999	2.66218	0.999999	0.761805	0.999999	2.66218	0.999999	0.813604	0.999999	92.5354	0.999999	50.2733	0.999999
0.644318	0.999999	2.66274	0.999999	0.761825	0.999999	2.66274	0.999999	0.813618	0.999999	92.5574	0.999999	50.2856	0.999999
0.644411	0.999999	2.66298	0.999999	0.761844	0.999999	2.66298	0.999999	0.81363	0.999999	92.5653	0.999999	50.298	0.999999
0.644691	0.999999	2.66305	0.999999	0.761862	0.999999	2.66305	0.999999	0.81365	0.999999	92.6307	0.999999	50.3039	0.999999
0.644714	0.999999	2.6631	0.999999	0.761862	0.999999	2.6631	0.999999	0.813719	0.999999	92.6556	0.999999	50.3177	0.999999
0.645125	0.999999	2.66337	0.999999	0.761867	0.999999	2.66337	0.999999	0.813731	0.999999	92.6562	0.999999	50.3234	0.999999
0.645186	0.999999	2.66339	0.999999	0.761926	0.999999	2.66339	0.999999	0.813785	0.999999	92.7058	0.999999	50.3318	0.999999
0.64527	0.999999	2.6634	0.999999	0.761952	0.999999	2.6634	0.999999	0.813787	0.999999	92.7237	0.999999	50.3326	0.999999
0.645449	0.999999	2.66343	0.999999	0.761954	0.999999	2.66343	0.999999	0.813801	0.999999	92.7244	0.999999	50.3546	0.999999
0.645502	0.999999	2.6638	0.999999	0.761972	0.999999	2.6638	0.999999	0.813828	0.999999	92.7492	0.999999	50.3616	0.999999
0.645541	0.999999	2.66394	0.999999	0.762082	0.999999	2.66394	0.999999	0.813854	0.999999	92.7742	0.999999	50.3672	0.999999
0.645544	0.999999	2.66397	0.999999	0.762085	0.999999	2.66397	0.999999	0.813875	0.999999	92.809	0.999999	50.3751	0.999999
0.645634	0.999999	2.66428	0.999999	0.762086	0.999999	2.66428	0.999999	0.813901	0.999999	92.8496	0.999999	50.4026	0.999999
0.645758	0.999999	2.66434	0.999999	0.762088	0.999999	2.66434	0.999999	0.813928	0.999999	92.87	0.999999	50.4364	0.999999
0.646499	0.999999	2.66435	0.999999	0.762101	0.999999	2.66435	0.999999	0.814065	0.999999	92.9114	0.999999	50.4368	0.999999
0.646689	0.999999	2.66439	0.999999	0.762128	0.999999	2.66439	0.999999	0.814099	0.999999	92.9195	0.999999	50.4462	0.999999
0.646801	0.999999	2.66459	0.999999	0.762176	0.999999	2.66459	0.999999	0.814102	0.999999	92.9389	0.999999	50.4715	0.999999
0.646934	0.999999	2.66468	0.999999	0.762187	0.999999	2.66468	0.999999	0.814192	0.999999	92.9441	0.999999	50.4955	0.999999
0.647033	0.999999	2.66485	0.999999	0.762222	0.999999	2.66485	0.999999	0.814202	0.999999	92.9488	0.999999	50.5087	0.999999
0.648911	0.999999	2.66487	0.999999	0.762238	0.999999	2.66487	0.999999	0.814231	0.999999	92.9706	0.999999	50.5242	0.999999
0.648997	0.999999	2.66494	0.999999	0.762256	0.999999	2.66494	0.999999	0.814232	0.999999	92.9851	0.999999	50.5311	0.999999
0.649131	0.999999	2.66515	0.999999	0.762257	0.999999	2.66515	0.999999	0.814242	0.999999	92.9988	0.999999	50.5413	0.999999
0.649372	0.999999	2.66543	0.999999	0.762279	0.999999	2.66543	0.999999	0.814282	0.999999	93.0144	0.999999	50.5446	0.999999
0.649461	0.999999	2.66558	0.999999	0.762283	0.999999	2.66558	0.999999	0.81434	0.999999	93.0627	0.999999	50.545	0.999999
0.649464	0.999999	2.66587	0.999999	0.762287	0.999999	2.66587	0.999999	0.814422	0.999999	93.0693	0.999999	50.5484	0.999999
0.649479	0.999999	2.66676	0.999999	0.762308	0.999999	2.66676	0.999999	0.814455	0.999999	93.0802	0.999999	50.5492	0.999999
0.64982	0.999999	2.66709	0.999999	0.76236	0.999999	2.66709	0.999999	0.814463	0.999999	93.1059	0.999999	50.5608	0.999999
0.649969	0.999999	2.66713	0.999999	0.762363	0.999999	2.66713	0.999999	0.8145	0.999999	93.1433	0.999999	50.5675	0.999999
0.650083	0.999999	2.66744	0.999999	0.762363	0.999999	2.66744	0.999999	0.81457	0.999999	93.1479	0.999999	50.5715	0.999999
0.650122	0.999999	2.66784	0.999999	0.762429	0.999999	2.66784	0.999999	0.814615	0.999999	93.1576	0.999999	50.5767	0.999999
0.650873	0.999999	2.66818	0.999999	0.762524	0.999999	2.66818	0.999999	0.814632	0.999999	93.1772	0.999999	50.5856	0.999999
0.650983	0.999999	2.66848	0.999999	0.762541	0.999999	2.66848	0.999999	0.814703	0.999999	93.2376	0.999999	50.6416	0.999999
0.651019	0.999999	2.66856	0.999999	0.762592	0.999999	2.66856	0.999999	0.814727	0.999999	93.252	0.999999	50.6598	0.999999
0.651278	0.999999	2.66878	0.999999	0.762594	0.999999	2.66878	0.999999	0.814745	0.999999	93.3395	0.999999	50.678	0.999999
0.65129	0.999999	2.6689	0.999999	0.762634	0.999999	2.6689	0.999999	0.814802	0.999999	93.3708	0.999999	50.7032	0.999999
0.651308	0.999999	2.66891	0.999999	0.762641	0.999999	2.66891	0.999999	0.814815	0.999999	93.3895	0.999999	50.7083	0.999999
0.651533	0.999999	2.6691	0.999999	0.762641	0.999999	2.6691	0.999999	0.814829	0.999999	93.3974	0.999999	50.7166	0.999999
0.651607	0.999999	2.66912	0.999999	0.762645	0.999999	2.66912	0.999999	0.814859	0.999999	93.406	0.999999	50.7296	0.999999
0.65175	0.999999	2.66918	0.999999	0.762648	0.999999	2.66918	0.999999	0.814893	0.999999	93.4084	0.999999	50.7338	0.999999
0.651784	0.999999	2.66924	0.999999	0.76267	0.999999	2.66924	0.999999	0.8149	0.999999	93.4263	0.999999	50.7399	0.999999
0.652122	0.999999	2.66934	0.999999	0.762746	0.999999	2.66934	0.999999	0.81491	0.999999	93.4352	0.999999	50.7409	0.999999
0.65227	0.999999	2.66951	0.999999	0.762811	0.999999	2.66951	0.999999	0.814948	0.999999	93.4384	0.999999	50.7498	0.999999
0.652481	0.999999	2.66958	0.999999	0.762812	0.999999	2.66958	0.999999	0.815007	0.999999	93.4446	0.999999	50.7559	0.999999
0.652774	0.999999	2.66973	0.999999	0.762823	0.999999	2.66973	0.999999	0.815009	0.999999	93.453	0.999999	50.7643	0.999999
0.652835	0.999999	2.66981	0.999999	0.762874	0.999999	2.66981	0.999999	0.815034	0.999999	93.4696	0.999999	50.7643	0.999999
0.653516	0.999999	2.66983	0.999999	0.762875	0.999999	2.66983	0.999999	0.815048	0.999999	93.5057	0.999999	50.7737	0.999999
0.65352	0.999999	2.6699	0.999999	0.762893	0.999999	2.6699	0.999999	0.815132	0.999999	93.5523	0.999999	50.7775	0.999999
0.653986	0.999999	2.67005	0.999999	0.762936	0.999999	2.67005	0.999999	0.81514	0.999999	93.5548	0.999999	50.7856	0.999999
0.654032	0.999999	2.67009	0.999999	0.762941	0.999999	2.67009	0.999999	0.815181	0.999999	93.5609	0.999999	50.7931	0.999999
0.654111	0.999999	2.67011	0.999999	0.763016	0.999999	2.67011	0.999999	0.815357	0.999999	93.5696	0.999999	50.7995	0.999999
0.654261	0.999999	2.67011	0.999999	0.763023	0.999999	2.67011	0.999999	0.815428	0.999999	93.6177	0.999999	50.8076	0.999999
0.654603	0.999999	2.67055	0.999999	0.763036	0.999999	2.67055	0.999999	0.815435	0.999999	93.6604	0.999999	50.8138	0.999999
0.654648	0.999999	2.67074	0.999999	0.763045	0.999999	2.67074	0.999999	0.815458	0.999999	93.6753	0.999999	50.8197	0.999999
0.654674	0.999999	2.67094	0.999999	0.763074	0.999999	2.67094	0.999999	0.81546	0.999999	93.7364	0.999999	50.8224	0.999999
0.654791	0.999999	2.67095	0.999999	0.763089	0.999999	2.67095	0.999999	0.815494	0.999999	93.8965	0.999999	50.848	0.999999
0.654803	0.999999	2.67098	0.999999	0.763091	0.999999	2.67098	0.999999	0.815532	0.999999	93.9053	0.999999	50.8502	0.999999
0.654958	0.999999	2.67136	0.999999	0.763136	0.999999	2.67136	0.999999	0.815579	0.999999	93.9298	0.999999	50.8651	0.999999
0.654982	0.999999	2.6717	0.999999	0.76317	0.999999	2.6717	0.999999	0.815619	0.999999	93.9832	0.999999	50.8826	0.999999
0.655431	0.999999	2.67184	0.999999	0.763191	0.999999	2.67184	0.999999	0.815669	0.999999	93.9965	0.999999	50.8838	0.999999
0.655613	0.999999	2.67186	0.999999	0.763196	0.999999	2.67186	0.999999	0.815701	0.999999	94.0012	0.999999	50.9145	0.999999
0.65565	0.999999	2.67211	0.999999	0.763235	0.999999	2.67211	0.999999	0.815789	0.999999	94.0234	0.999999	50.9311	0.999999
0.65569	0.999999	2.67245	0.999999	0.763237	0.999999	2.67245	0.999999	0.815893	0.999999	94.0272	0.999999	50.9344	0.999999
0.655694	0.999999	2.67306	0.999999	0.763248	0.999999	2.67306	0.999999	0.815909	0.999999	94.0704	0.999999	50.9362	0.999999
0.655717	0.999999	2.67317	0.999999	0.763252	0.999999	2.67317	0.999999	0.81595	0.999999	94.0726	0.999999	50.9619	0.999999
0.65573	0.999999	2.67327	0.999999	0.763266	0.999999	2.67327	0.999999	0.815981	0.999999	94.0874	0.999999	50.9632	0.999999
0.655864	0.999999	2.67328	0.999999	0.763278	0.999999	2.67328	0.999999	0.815998	0.999999	94.0901	0.999999	50.9651	0.999999
0.6561	0.999999	2.67329	0.999999	0.763302	0.999999	2.67329	0.999999	0.816027	0.999999	94.1173	0.999999	50.9686	0.999999
0.656241	0.999999	2.67337	0.999999	0.76332	0.999999	2.67337	0.999999	0.816128	0.999999	94.135	0.999999	50.9702	0.999999
0.656368	0.999999	2.67343	0.999999	0.763337	0.999999	2.67343	0.999999	0.81613	0.999999	94.2421	0.999999	50.9822	0.999999
0.656413	0.999999	2.67357	0.999999	0.763383	0.999999	2.67357	0.999999	0.816136	0.999999	94.2466	0.999999	50.9992	0.999999
0.6567	0.999999	2.67395	0.999999	0.763384	0.999999	2.67395	0.999999	0.81621	0.999999	94.2736	0.999999	51.0005	0.999999
0.656829	0.999999	2.67397	0.999999	0.763424	0.999999	2.67397	0.999999	0.816225	0.999999	94.297	0.999999	51.0024	0.999999
0.656943	0.999999	2.67412	0.999999	0.763441	0.999999	2.67412	0.999999	0.816267	0.999999	94.3052	0.999999	51.0149	0.999999
0.657011	0.999999	2.67424	0.999999	0.763441	0.999999	2.67424	0.999999	0.816285	0.999999	94.3437	0.999999	51.0173	0.999999
0.657056	0.999999	2.67437	0.999999	0.763469	0.999999	2.67437	0.999999	0.816376	0.999999	94.3677	0.999999	51.0209	0.999999
0.657056	0.999999	2.67462	0.999999	0.763479	0.999999	2.67462	0.999999	0.816393	0.999999	94.4791	0.999999	51.0466	0.999999
0.657561	0.999999	2.67478	0.999999	0.763491	0.999999	2.67478	0.999999	0.816433	0.999999	94.4863	0.999999	51.0483	0.999999
0.657778	0.999999	2.67489	0.999999	0.763502	0.999999	2.67489	0.999999	0.816436	0.999999	94.4946	0.999999	51.0571	0.999999
0.658036	0.999999	2.67507	0.999999	0.763546	0.999999	2.67507	0.999999	0.816457	0.999999	94.4948	0.999999	51.0767	0.999999
0.65812	0.999999	2.67542	0.999999	0.763559	0.999999	2.67542	0.999999	0.816546	0.999999	94.5028	0.999999	51.0817	0.999999
0.658381	0.999999	2.67542	0.999999	0.763606	0.999999	2.67542	0.999999	0.816619	0.999999	94.5128	0.999999	51.0847	0.999999
0.65846	0.999999	2.6755	0.999999	0.763619	0.999999	2.6755	0.999999	0.816625	0.999999	94.5299	0.999999	51.1037	0.999999
0.658541	0.999999	2.67588	0.999999	0.763621	0.999999	2.67588	0.999999	0.816635	0.999999	94.558	0.999999	51.1068	0.999999
0.658586	0.999999	2.67619	0.999999	0.763675	0.999999	2.67619	0.999999	0.816679	0.999999	94.5645	0.999999	51.1086	0.999999
0.658631	0.999999	2.67626	0.999999	0.763684	0.999999	2.67626	0.999999	0.816755	0.999999	94.5764	0.999999	51.1206	0.999999
0.658813	0.999999	2.67632	0.999999	0.763728	0.999999	2.67632	0.999999	0.81677	0.999999	94.6003	0.999999	51.1335	0.999999
0.658888	0.999999	2.67652	0.999999	0.763756	0.999999	2.67652	0.999999	0.816785	0.999999	94.6008	0.999999	51.1576	0.999999
0.658907	0.999999	2.67658	0.999999	0.76376	0.999999	2.67658	0.999999	0.816819	0.999999	94.6089	0.999999	51.1649	0.999999
0.659523	0.999999	2.6769	0.999999	0.763761	0.999999	2.6769	0.999999	0.816825	0.999999	94.6356	0.999999	51.1653	0.999999
0.659557	0.999999	2.67711	0.999999	0.76377	0.999999	2.67711	0.999999	0.816827	0.999999	94.6526	0.999999	51.1659	0.999999
0.659659	0.999999	2.6773	0.999999	0.763772	0.999999	2.6773	0.999999	0.81686	0.999999	94.7016	0.999999	51.1817	0.999999
0.660021	0.999999	2.67736	0.999999	0.763777	0.999999	2.67736	0.999999	0.816961	0.999999	94.7069	0.999999	51.1984	0.999999
0.660372	0.999999	2.67737	0.999999	0.763786	0.999999	2.67737	0.999999	0.817001	0.999999	94.7186	0.999999	51.2139	0.999999
0.660457	0.999999	2.67756	0.999999	0.763798	0.999999	2.67756	0.999999	0.817012	0.999999	94.7699	0.999999	51.2161	0.999999
0.660619	0.999999	2.67759	0.999999	0.763827	0.999999	2.67759	0.999999	0.817103	0.999999	94.7874	0.999999	51.2167	0.999999
0.66063	0.999999	2.67764	0.999999	0.763839	0.999999	2.67764	0.999999	0.817249	0.999999	94.861	0.999999	51.2204	0.999999
0.660946	0.999999	2.67774	0.999999	0.763839	0.999999	2.67774	0.999999	0.817271	0.999999	94.869	0.999999	51.2206	0.999999
0.66097	0.999999	2.67788	0.999999	0.763932	0.999999	2.67788	0.999999	0.817298	0.999999	94.8694	0.999999	51.2217	0.999999
0.661051	0.999999	2.67793	0.999999	0.764035	0.999999	2.67793	0.999999	0.817371	0.999999	94.8847	0.999999	51.2301	0.999999
0.661263	0.999999	2.67818	0.999999	0.764066	0.999999	2.67818	0.999999	0.817383	0.999999	94.9839	0.999999	51.2309	0.999999
0.66134	0.999999	2.6782	0.999999	0.764068	0.999999	2.6782	0.999999	0.817526	0.999999	95.0022	0.999999	51.2375	0.999999
0.661373	0.999999	2.67849	0.999999	0.764097	0.999999	2.67849	0.999999	0.817552	0.999999	95.0438	0.999999	51.2412	0.999999
0.661565	0.999999	2.67855	0.999999	0.764105	0.999999	2.67855	0.999999	0.817613	0.999999	95.0547	0.999999	51.2579	0.999999
0.661599	0.999999	2.67856	0.999999	0.764118	0.999999	2.67856	0.999999	0.817652	0.999999	95.0625	0.999999	51.26	0.999999
0.661673	0.999999	2.67895	0.999999	0.76416	0.999999	2.67895	0.999999	0.81767	0.999999	95.0726	0.999999	51.2763	0.999999
0.66175	0.999999	2.67897	0.999999	0.764179	0.999999	2.67897	0.999999	0.817749	0.999999	95.1657	0.999999	51.2838	0.999999
0.661777	0.999999	2.67932	0.999999	0.764186	0.999999	2.67932	0.999999	0.817782	0.999999	95.1725	0.999999	51.2873	0.999999
0.661836	0.999999	2.67935	0.999999	0.764226	0.999999	2.67935	0.999999	0.817786	0.999999	95.1819	0.999999	51.2919	0.999999
0.661858	0.999999	2.67954	0.999999	0.764245	0.999999	2.67954	0.999999	0.817818	0.999999	95.1922	0.999999	51.296	0.999999
0.661877	0.999999	2.67965	0.999999	0.764251	0.999999	2.67965	0.999999	0.81794	0.999999	95.2211	0.999999	51.3126	0.999999
0.662005	0.999999	2.67966	0.999999	0.764286	0.999999	2.67966	0.999999	0.817955	0.999999	95.2482	0.999999	51.3231	0.999999
0.662095	0.999999	2.67973	0.999999	0.764333	0.999999	2.67973	0.999999	0.818062	0.999999	95.275	0.999999	51.3247	0.999999
0.662157	0.999999	2.67992	0.999999	0.764354	0.999999	2.67992	0.999999	0.818109	0.999999	95.3203	0.999999	51.3262	0.999999
0.662183	0.999999	2.68007	0.999999	0.764357	0.999999	2.68007	0.999999	0.818222	0.999999	95.3221	0.999999	51.3343	0.999999
0.662238	0.999999	2.68012	0.999999	0.764366	0.999999	2.68012	0.999999	0.818223	0.999999	95.3371	0.999999	51.3456	0.999999
0.662359	0.999999	2.6802	0.999999	0.764384	0.999999	2.6802	0.999999	0.818289	0.999999	95.3372	0.999999	51.3654	0.999999
0.662457	0.999999	2.68029	0.999999	0.764434	0.999999	2.68029	0.999999	0.818333	0.999999	95.3945	0.999999	51.3799	0.999999
0.662616	0.999999	2.68045	0.999999	0.764462	0.999999	2.68045	0.999999	0.818346	0.999999	95.418	0.999999	51.3802	0.999999
0.662707	0.999999	2.68052	0.999999	0.764466	0.999999	2.68052	0.999999	0.818429	0.999999	95.4766	0.999999	51.3887	0.999999
0.662708	0.999999	2.68069	0.999999	0.764484	0.999999	2.68069	0.999999	0.818537	0.999999	95.4861	0.999999	51.3938	0.999999
0.662921	0.999999	2.68069	0.999999	0.764487	0.999999	2.68069	0.999999	0.818554	0.999999	95.507	0.999999	51.4134	0.999999
0.66299	0.999999	2.68074	0.999999	0.764488	0.999999	2.68074	0.999999	0.818632	0.999999	95.5122	0.999999	51.4233	0.999999
0.663045	0.999999	2.68121	0.999999	0.764491	0.999999	2.68121	0.999999	0.818648	0.999999	95.5547	0.999999	51.429	0.999999
0.6631	0.999999	2.68146	0.999999	0.764502	0.999999	2.68146	0.999999	0.818656	0.999999	95.672	0.999999	51.4347	0.999999
0.663434	0.999999	2.68153	0.999999	0.764537	0.999999	2.68153	0.999999	0.818672	0.999999	95.6914	0.999999	51.4362	0.999999
0.6635	0.999999	2.68174	0.999999	0.764569	0.999999	2.68174	0.999999	0.818699	0.999999	95.693	0.999999	51.438	0.999999
0.663533	0.999999	2.68176	0.999999	0.764571	0.999999	2.68176	0.999999	0.818776	0.999999	95.6968	0.999999	51.4447	0.999999
0.663652	0.999999	2.68181	0.999999	0.764572	0.999999	2.68181	0.999999	0.818788	0.999999	95.7137	0.999999	51.4459	0.999999
0.663658	0.999999	2.68195	0.999999	0.764604	0.999999	2.68195	0.999999	0.81885	0.999999	95.7825	0.999999	51.4594	0.999999
0.663701	0.999999	2.68217	0.999999	0.764609	0.999999	2.68217	0.999999	0.818868	0.999999	95.8157	0.999999	51.4658	0.999999
0.663709	0.999999	2.68259	0.999999	0.76464	0.999999	2.68259	0.999999	0.818877	0.999999	95.895	0.999999	51.4758	0.999999
0.664037	0.999999	2.68267	0.999999	0.764642	0.999999	2.68267	0.999999	0.818901	0.999999	95.8967	0.999999	51.4835	0.999999
0.664124	0.999999	2.68289	0.999999	0.764642	0.999999	2.68289	0.999999	0.818925	0.999999	95.9742	0.999999	51.4863	0.999999
0.664167	0.999999	2.68313	0.999999	0.764655	0.999999	2.68313	0.999999	0.818927	0.999999	96.0053	0.999999	51.5036	0.999999
0.664256	0.999999	2.68335	0.999999	0.76466	0.999999	2.68335	0.999999	0.818936	0.999999	96.0131	0.999999	51.5071	0.999999
0.664482	0.999999	2.68357	0.999999	0.764689	0.999999	2.68357	0.999999	0.81904	0.999999	96.0205	0.999999	51.5374	0.999999
0.664638	0.999999	2.68357	0.999999	0.764702	0.999999	2.68357	0.999999	0.819297	0.999999	96.0385	0.999999	51.5502	0.999999
0.665022	0.999999	2.68361	0.999999	0.764718	0.999999	2.68361	0.999999	0.819299	0.999999	96.0453	0.999999	51.552	0.999999
0.665036	0.999999	2.68364	0.999999	0.764755	0.999999	2.68364	0.999999	0.819307	0.999999	96.0818	0.999999	51.5549	0.999999
0.66551	0.999999	2.68365	0.999999	0.76477	0.999999	2.68365	0.999999	0.819367	0.999999	96.1136	0.999999	51.5593	0.999999
0.665647	0.999999	2.68383	0.999999	0.764791	0.999999	2.68383	0.999999	0.819387	0.999999	96.1153	0.999999	51.5703	0.999999
0.665766	0.999999	2.68401	0.999999	0.764833	0.999999	2.68401	0.999999	0.819395	0.999999	96.1153	0.999999	51.5735	0.999999
0.665821	0.999999	2.6841	0.999999	0.76485	0.999999	2.6841	0.999999	0.819396	0.999999	96.1157	0.999999	51.5823	0.999999
0.665886	0.999999	2.68415	0.999999	0.764897	0.999999	2.68415	0.999999	0.819409	0.999999	96.1446	0.999999	51.5867	0.999999
0.665974	0.999999	2.68432	0.999999	0.764911	0.999999	2.68432	0.999999	0.81941	0.999999	96.1586	0.999999	51.5896	0.999999
0.66613	0.999999	2.68442	0.999999	0.764929	0.999999	2.68442	0.999999	0.819468	0.999999	96.1636	0.999999	51.5921	0.999999
0.666306	0.999999	2.68468	0.999999	0.764934	0.999999	2.68468	0.999999	0.819729	0.999999	96.167	0.999999	51.5971	0.999999
0.666318	0.999999	2.68512	0.999999	0.76494	0.999999	2.68512	0.999999	0.819745	0.999999	96.1747	0.999999	51.6079	0.999999
0.666425	0.999999	2.6854	0.999999	0.76495	0.999999	2.6854	0.999999	0.819765	0.999999	96.1876	0.999999	51.6105	0.999999
0.666495	0.999999	2.68544	0.999999	0.765001	0.999999	2.68544	0.999999	0.819801	0.999999	96.2083	0.999999	51.6117	0.999999
0.666725	0.999999	2.68547	0.999999	0.765023	0.999999	2.68547	0.999999	0.819803	0.999999	96.2129	0.999999	51.6139	0.999999
0.666868	0.999999	2.68548	0.999999	0.765026	0.999999	2.68548	0.999999	0.819848	0.999999	96.226	0.999999	51.614	0.999999
0.66708	0.999999	2.6857	0.999999	0.765063	0.999999	2.6857	0.999999	0.819879	0.999999	96.2749	0.999999	51.6152	0.999999
0.667314	0.999999	2.68572	0.999999	0.765064	0.999999	2.68572	0.999999	0.819923	0.999999	96.2894	0.999999	51.6164	0.999999
0.667314	0.999999	2.68588	0.999999	0.765071	0.999999	2.68588	0.999999	0.819932	0.999999	96.3071	0.999999	51.6164	0.999999
0.667356	0.999999	2.68592	0.999999	0.765092	0.999999	2.68592	0.999999	0.819934	0.999999	96.3156	0.999999	51.6206	0.999999
0.667526	0.999999	2.68621	0.999999	0.765108	0.999999	2.68621	0.999999	0.81999	0.999999	96.3686	0.999999	51.6214	0.999999
0.667777	0.999999	2.68633	0.999999	0.765148	0.999999	2.68633	0.999999	0.819994	0.999999	96.4199	0.999999	51.6522	0.999999
0.66781	0.999999	2.68638	0.999999	0.765161	0.999999	2.68638	0.999999	0.819996	0.999999	96.4872	0.999999	51.6531	0.999999
0.667836	0.999999	2.68667	0.999999	0.76517	0.999999	2.68667	0.999999	0.82003	0.999999	96.4954	0.999999	51.6691	0.999999
0.667941	0.999999	2.68687	0.999999	0.765181	0.999999	2.68687	0.999999	0.820043	0.999999	96.5264	0.999999	51.6831	0.999999
0.668105	0.999999	2.6869	0.999999	0.765192	0.999999	2.6869	0.999999	0.820073	0.999999	96.5756	0.999999	51.6836	0.999999
0.668325	0.999999	2.68697	0.999999	0.76525	0.999999	2.68697	0.999999	0.82008	0.999999	96.6334	0.999999	51.6969	0.999999
0.668362	0.999999	2.68708	0.999999	0.765254	0.999999	2.68708	0.999999	0.820114	0.999999	96.6421	0.999999	51.6977	0.999999
0.668445	0.999999	2.68752	0.999999	0.765319	0.999999	2.68752	0.999999	0.820138	0.999999	96.6492	0.999999	51.719	0.999999
0.668584	0.999999	2.68756	0.999999	0.765319	0.999999	2.68756	0.999999	0.820177	0.999999	96.6504	0.999999	51.7192	0.999999
0.668652	0.999999	2.68767	0.999999	0.765342	0.999999	2.68767	0.999999	0.82019	0.999999	96.6915	0.999999	51.7262	0.999999
0.668936	0.999999	2.68779	0.999999	0.765357	0.999999	2.68779	0.999999	0.820232	0.999999	96.6962	0.999999	51.7301	0.999999
0.669145	0.999999	2.68782	0.999999	0.765361	0.999999	2.68782	0.999999	0.820346	0.999999	96.7323	0.999999	51.7305	0.999999
0.669277	0.999999	2.68803	0.999999	0.765373	0.999999	2.68803	0.999999	0.82042	0.999999	96.8216	0.999999	51.7367	0.999999
0.669313	0.999999	2.68819	0.999999	0.765376	0.999999	2.68819	0.999999	0.820424	0.999999	96.9552	0.999999	51.7431	0.999999
0.66945	0.999999	2.68837	0.999999	0.765396	0.999999	2.68837	0.999999	0.820444	0.999999	96.9552	0.999999	51.7484	0.999999
0.669633	0.999999	2.68868	0.999999	0.765438	0.999999	2.68868	0.999999	0.820481	0.999999	97.0162	0.999999	51.75	0.999999
0.669637	0.999999	2.68874	0.999999	0.765447	0.999999	2.68874	0.999999	0.820528	0.999999	97.0279	0.999999	51.7584	0.999999
0.66973	0.999999	2.68878	0.999999	0.765452	0.999999	2.68878	0.999999	0.820669	0.999999	97.0284	0.999999	51.7725	0.999999
0.66984	0.999999	2.68887	0.999999	0.765497	0.999999	2.68887	0.999999	0.820704	0.999999	97.0397	0.999999	51.7983	0.999999
0.669861	0.999999	2.68897	0.999999	0.765537	0.999999	2.68897	0.999999	0.820721	0.999999	97.0402	0.999999	51.8072	0.999999
0.669916	0.999999	2.6892	0.999999	0.765538	0.999999	2.6892	0.999999	0.820956	0.999999	97.0484	0.999999	51.8102	0.999999
0.669931	0.999999	2.68931	0.999999	0.76554	0.999999	2.68931	0.999999	0.820991	0.999999	97.0571	0.999999	51.8124	0.999999
0.670354	0.999999	2.68938	0.999999	0.765543	0.999999	2.68938	0.999999	0.821052	0.999999	97.0619	0.999999	51.8137	0.999999
0.670451	0.999999	2.6894	0.999999	0.765629	0.999999	2.6894	0.999999	0.821061	0.999999	97.0766	0.999999	51.8209	0.999999
0.670536	0.999999	2.68954	0.999999	0.765651	0.999999	2.68954	0.999999	0.821137	0.999999	97.0949	0.999999	51.821	0.999999
0.670596	0.999999	2.68961	0.999999	0.765669	0.999999	2.68961	0.999999	0.821142	0.999999	97.1092	0.999999	51.8214	0.999999
0.670631	0.999999	2.68973	0.999999	0.765674	0.999999	2.68973	0.999999	0.821209	0.999999	97.1173	0.999999	51.8216	0.999999
0.670636	0.999999	2.68979	0.999999	0.765679	0.999999	2.68979	0.999999	0.821237	0.999999	97.1383	0.999999	51.8241	0.999999
0.670686	0.999999	2.6898	0.999999	0.765736	0.999999	2.6898	0.999999	0.821268	0.999999	97.146	0.999999	51.8271	0.999999
0.670687	0.999999	2.6898	0.999999	0.765756	0.999999	2.6898	0.999999	0.821305	0.999999	97.2123	0.999999	51.842	0.999999
0.670733	0.999999	2.68982	0.999999	0.765759	0.999999	2.68982	0.999999	0.821309	0.999999	97.2782	0.999999	51.8432	0.999999
0.671241	0.999999	2.68996	0.999999	0.765761	0.999999	2.68996	0.999999	0.821408	0.999999	97.3132	0.999999	51.8544	0.999999
0.671378	0.999999	2.6901	0.999999	0.765791	0.999999	2.6901	0.999999	0.821474	0.999999	97.3619	0.999999	51.8577	0.999999
0.671382	0.999999	2.69011	0.999999	0.765813	0.999999	2.69011	0.999999	0.82165	0.999999	97.3818	0.999999	51.8662	0.999999
0.671447	0.999999	2.69014	0.999999	0.765819	0.999999	2.69014	0.999999	0.821652	0.999999	97.4076	0.999999	51.875	0.999999
0.671795	0.999999	2.69035	0.999999	0.765861	0.999999	2.69035	0.999999	0.821706	0.999999	97.4387	0.999999	51.8828	0.999999
0.671932	0.999999	2.69045	0.999999	0.765866	0.999999	2.69045	0.999999	0.821734	0.999999	97.4402	0.999999	51.8831	0.999999
0.671954	0.999999	2.69065	0.999999	0.765923	0.999999	2.69065	0.999999	0.821896	0.999999	97.4741	0.999999	51.8874	0.999999
0.672225	0.999999	2.69088	0.999999	0.765932	0.999999	2.69088	0.999999	0.821933	0.999999	97.4996	0.999999	51.8905	0.999999
0.672416	0.999999	2.69089	0.999999	0.765933	0.999999	2.69089	0.999999	0.821973	0.999999	97.5067	0.999999	51.8955	0.999999
0.672494	0.999999	2.69106	0.999999	0.765933	0.999999	2.69106	0.999999	0.821982	0.999999	97.5329	0.999999	51.8997	0.999999
0.672569	0.999999	2.6911	0.999999	0.765934	0.999999	2.6911	0.999999	0.821992	0.999999	97.5468	0.999999	51.9246	0.999999
0.672816	0.999999	2.69153	0.999999	0.765943	0.999999	2.69153	0.999999	0.822031	0.999999	97.5876	0.999999	51.9265	0.999999
0.672889	0.999999	2.69154	0.999999	0.765945	0.999999	2.69154	0.999999	0.822096	0.999999	97.6196	0.999999	51.9283	0.999999
0.672994	0.999999	2.69162	0.999999	0.765983	0.999999	2.69162	0.999999	0.822221	0.999999	97.6368	0.999999	51.93	0.999999
0.673035	0.999999	2.69169	0.999999	0.766024	0.999999	2.69169	0.999999	0.82226	0.999999	97.644	0.999999	51.9336	0.999999
0.673069	0.999999	2.69171	0.999999	0.766075	0.999999	2.69171	0.999999	0.822274	0.999999	97.6518	0.999999	51.9387	0.999999
0.673194	0.999999	2.69201	0.999999	0.766075	0.999999	2.69201	0.999999	0.8223	0.999999	97.658	0.999999	51.9419	0.999999
0.673225	0.999999	2.69226	0.999999	0.766098	0.999999	2.69226	0.999999	0.822361	0.999999	97.6666	0.999999	51.9442	0.999999
0.673248	0.999999	2.69228	0.999999	0.766188	0.999999	2.69228	0.999999	0.82237	0.999999	97.6829	0.999999	51.9508	0.999999
0.673318	0.999999	2.69276	0.999999	0.76622	0.999999	2.69276	0.999999	0.82238	0.999999	97.8311	0.999999	51.9578	0.999999
0.673337	0.999999	2.69278	0.999999	0.766263	0.999999	2.69278	0.999999	0.822523	0.999999	97.8371	0.999999	51.9604	0.999999
0.67336	0.999999	2.69287	0.999999	0.766288	0.999999	2.69287	0.999999	0.822532	0.999999	97.843	0.999999	51.9607	0.999999
0.673387	0.999999	2.69295	0.999999	0.76629	0.999999	2.69295	0.999999	0.822565	0.999999	97.9083	0.999999	51.9642	0.999999
0.673462	0.999999	2.6933	0.999999	0.766306	0.999999	2.6933	0.999999	0.822578	0.999999	97.9338	0.999999	51.9755	0.999999
0.67377	0.999999	2.69334	0.999999	0.766342	0.999999	2.69334	0.999999	0.822646	0.999999	97.9347	0.999999	51.9826	0.999999
0.673889	0.999999	2.69358	0.999999	0.766361	0.999999	2.69358	0.999999	0.822698	0.999999	97.9476	0.999999	51.9843	0.999999
0.673964	0.999999	2.69367	0.999999	0.766371	0.999999	2.69367	0.999999	0.822716	0.999999	97.9507	0.999999	51.9865	0.999999
0.674166	0.999999	2.69371	0.999999	0.766386	0.999999	2.69371	0.999999	0.822748	0.999999	97.9536	0.999999	51.9866	0.999999
0.674266	0.999999	2.69372	0.999999	0.766405	0.999999	2.69372	0.999999	0.822752	0.999999	97.9594	0.999999	51.9997	0.999999
0.67433	0.999999	2.69394	0.999999	0.76641	0.999999	2.69394	0.999999	0.822758	0.999999	97.9623	0.999999	52.0004	0.999999
0.674434	0.999999	2.69399	0.999999	0.766432	0.999999	2.69399	0.999999	0.822782	0.999999	97.9743	0.999999	52.0016	0.999999
0.67455	0.999999	2.69403	0.999999	0.766434	0.999999	2.69403	0.999999	0.822794	0.999999	98.0061	0.999999	52.0029	0.999999
0.674711	0.999999	2.69407	0.999999	0.766437	0.999999	2.69407	0.999999	0.822908	0.999999	98.0096	0.999999	52.0088	0.999999
0.674768	0.999999	2.69425	0.999999	0.766477	0.999999	2.69425	0.999999	0.82291	0.999999	98.017	0.999999	52.0103	0.999999
0.6751	0.999999	2.6943	0.999999	0.766517	0.999999	2.6943	0.999999	0.822933	0.999999	98.0343	0.999999	52.0149	0.999999
0.675196	0.999999	2.6947	0.999999	0.766524	0.999999	2.6947	0.999999	0.823008	0.999999	98.1515	0.999999	52.0201	0.999999
0.675324	0.999999	2.69477	0.999999	0.766566	0.999999	2.69477	0.999999	0.823051	0.999999	98.1563	0.999999	52.0238	0.999999
0.675425	0.999999	2.69491	0.999999	0.76662	0.999999	2.69491	0.999999	0.823062	0.999999	98.1605	0.999999	52.0356	0.999999
0.67593	0.999999	2.69494	0.999999	0.76662	0.999999	2.69494	0.999999	0.823109	0.999999	98.1973	0.999999	52.0476	0.999999
0.675948	0.999999	2.69497	0.999999	0.766647	0.999999	2.69497	0.999999	0.823121	0.999999	98.2883	0.999999	52.051	0.999999
0.675963	0.999999	2.69499	0.999999	0.76665	0.999999	2.69499	0.999999	0.823123	0.999999	98.2973	0.999999	52.0609	0.999999
0.675976	0.999999	2.69502	0.999999	0.766653	0.999999	2.69502	0.999999	0.823132	0.999999	98.3694	0.999999	52.0669	0.999999
0.676133	0.999999	2.69597	0.999999	0.766699	0.999999	2.69597	0.999999	0.823191	0.999999	98.3832	0.999999	52.0687	0.999999
0.676151	0.999999	2.69607	0.999999	0.766702	0.999999	2.69607	0.999999	0.823214	0.999999	98.3906	0.999999	52.0745	0.999999
0.676159	0.999999	2.69624	0.999999	0.766746	0.999999	2.69624	0.999999	0.823227	0.999999	98.4398	0.999999	52.075	0.999999
0.676182	0.999999	2.69625	0.999999	0.766756	0.999999	2.69625	0.999999	0.823278	0.999999	98.4452	0.999999	52.0757	0.999999
0.676241	0.999999	2.69636	0.999999	0.766762	0.999999	2.69636	0.999999	0.823289	0.999999	98.4537	0.999999	52.0772	0.999999
0.676353	0.999999	2.69641	0.999999	0.766806	0.999999	2.69641	0.999999	0.82329	0.999999	98.5143	0.999999	52.0874	0.999999
0.676519	0.999999	2.69648	0.999999	0.766842	0.999999	2.69648	0.999999	0.823314	0.999999	98.5381	0.999999	52.0918	0.999999
0.676597	0.999999	2.69657	0.999999	0.766936	0.999999	2.69657	0.999999	0.823319	0.999999	98.55	0.999999	52.0938	0.999999
0.676625	0.999999	2.69659	0.999999	0.76696	0.999999	2.69659	0.999999	0.823366	0.999999	98.5778	0.999999	52.1057	0.999999
0.676684	0.999999	2.69663	0.999999	0.766974	0.999999	2.69663	0.999999	0.823447	0.999999	98.6387	0.999999	52.1064	0.999999
0.67683	0.999999	2.69689	0.999999	0.766988	0.999999	2.69689	0.999999	0.823493	0.999999	98.6388	0.999999	52.1072	0.999999
0.676892	0.999999	2.697	0.999999	0.767005	0.999999	2.697	0.999999	0.823502	0.999999	98.6391	0.999999	52.1091	0.999999
0.67696	0.999999	2.69704	0.999999	0.767006	0.999999	2.69704	0.999999	0.823507	0.999999	98.6811	0.999999	52.1093	0.999999
0.677042	0.999999	2.69716	0.999999	0.76701	0.999999	2.69716	0.999999	0.823511	0.999999	98.7568	0.999999	52.1181	0.999999
0.677071	0.999999	2.69722	0.999999	0.767049	0.999999	2.69722	0.999999	0.823538	0.999999	98.7609	0.999999	52.1272	0.999999
0.677162	0.999999	2.69723	0.999999	0.767057	0.999999	2.69723	0.999999	0.823581	0.999999	98.7713	0.999999	52.1296	0.999999
0.677244	0.999999	2.69748	0.999999	0.767078	0.999999	2.69748	0.999999	0.823617	0.999999	98.8438	0.999999	52.1318	0.999999
0.677296	0.999999	2.69751	0.999999	0.767081	0.999999	2.69751	0.999999	0.823668	0.999999	98.8467	0.999999	52.1332	0.999999
0.677332	0.999999	2.69759	0.999999	0.767089	0.999999	2.69759	0.999999	0.823708	0.999999	98.8559	0.999999	52.1372	0.999999
0.677423	0.999999	2.6976	0.999999	0.767099	0.999999	2.6976	0.999999	0.823727	0.999999	98.8645	0.999999	52.1407	0.999999
0.677453	0.999999	2.69764	0.999999	0.767125	0.999999	2.69764	0.999999	0.823744	0.999999	98.8645	0.999999	52.1488	0.999999
0.677987	0.999999	2.69789	0.999999	0.767155	0.999999	2.69789	0.999999	0.823765	0.999999	98.8683	0.999999	52.1501	0.999999
0.67799	0.999999	2.69789	0.999999	0.767155	0.999999	2.69789	0.999999	0.823809	0.999999	98.8931	0.999999	52.1522	0.999999
0.678252	0.999999	2.69804	0.999999	0.76716	0.999999	2.69804	0.999999	0.823841	0.999999	98.8945	0.999999	52.1552	0.999999
0.678347	0.999999	2.6984	0.999999	0.767163	0.999999	2.6984	0.999999	0.823851	0.999999	98.904	0.999999	52.1614	0.999999
0.678385	0.999999	2.69842	0.999999	0.767174	0.999999	2.69842	0.999999	0.823917	0.999999	98.9255	0.999999	52.1724	0.999999
0.678538	0.999999	2.69854	0.999999	0.767187	0.999999	2.69854	0.999999	0.82392	0.999999	98.9315	0.999999	52.1829	0.999999
0.678568	0.999999	2.69859	0.999999	0.767194	0.999999	2.69859	0.999999	0.823948	0.999999	98.9483	0.999999	52.1872	0.999999
0.678783	0.999999	2.69889	0.999999	0.767326	0.999999	2.69889	0.999999	0.823958	0.999999	98.9607	0.999999	52.1911	0.999999
0.67887	0.999999	2.6989	0.999999	0.767329	0.999999	2.6989	0.999999	0.823961	0.999999	98.9821	0.999999	52.1956	0.999999
0.678934	0.999999	2.69892	0.999999	0.767333	0.999999	2.69892	0.999999	0.824015	0.999999	98.9916	0.999999	52.1972	0.999999
0.678959	0.999999	2.69898	0.999999	0.767359	0.999999	2.69898	0.999999	0.824033	0.999999	99.0131	0.999999	52.2024	0.999999
0.67899	0.999999	2.69904	0.999999	0.767386	0.999999	2.69904	0.999999	0.82406	0.999999	99.0264	0.999999	52.2054	0.999999
0.679091	0.999999	2.69933	0.999999	0.767393	0.999999	2.69933	0.999999	0.824073	0.999999	99.047	0.999999	52.2076	0.999999
0.679197	0.999999	2.69938	0.999999	0.767395	0.999999	2.69938	0.999999	0.824126	0.999999	99.0525	0.999999	52.2082	0.999999
0.679197	0.999999	2.69939	0.999999	0.767465	0.999999	2.69939	0.999999	0.824154	0.999999	99.0734	0.999999	52.2089	0.999999
0.679249	0.999999	2.6994	0.999999	0.767468	0.999999	2.6994	0.999999	0.824216	0.999999	99.2029	0.999999	52.2109	0.999999
0.679291	0.999999	2.69947	0.999999	0.767471	0.999999	2.69947	0.999999	0.824223	0.999999	99.2029	0.999999	52.2201	0.999999
0.679319	0.999999	2.69947	0.999999	0.767478	0.999999	2.69947	0.999999	0.824265	0.999999	99.2195	0.999999	52.2212	0.999999
0.679321	0.999999	2.6997	0.999999	0.767524	0.999999	2.6997	0.999999	0.824406	0.999999	99.2531	0.999999	52.229	0.999999
0.679438	0.999999	2.69974	0.999999	0.76757	0.999999	2.69974	0.999999	0.824432	0.999999	99.296	0.999999	52.2292	0.999999
0.679534	0.999999	2.69976	0.999999	0.767651	0.999999	2.69976	0.999999	0.824457	0.999999	99.3342	0.999999	52.2318	0.999999
0.679781	0.999999	2.7003	0.999999	0.7677	0.999999	2.7003	0.999999	0.824551	0.999999	99.3521	0.999999	52.2329	0.999999
0.679942	0.999999	2.70045	0.999999	0.767755	0.999999	2.70045	0.999999	0.824568	0.999999	99.3623	0.999999	52.2359	0.999999
0.680041	0.999999	2.70056	0.999999	0.767756	0.999999	2.70056	0.999999	0.824635	0.999999	99.3877	0.999999	52.241	0.999999
0.680519	0.999999	2.70077	0.999999	0.767757	0.999999	2.70077	0.999999	0.824654	0.999999	99.4139	0.999999	52.2432	0.999999
0.68072	0.999999	2.70079	0.999999	0.767765	0.999999	2.70079	0.999999	0.824787	0.999999	99.4244	0.999999	52.2441	0.999999
0.680835	0.999999	2.70095	0.999999	0.767772	0.999999	2.70095	0.999999	0.82486	0.999999	99.4534	0.999999	52.2443	0.999999
0.680885	0.999999	2.70105	0.999999	0.767824	0.999999	2.70105	0.999999	0.824953	0.999999	99.5119	0.999999	52.2449	0.999999
0.68096	0.999999	2.70116	0.999999	0.76784	0.999999	2.70116	0.999999	0.824961	0.999999	99.5358	0.999999	52.2467	0.999999
0.680975	0.999999	2.70124	0.999999	0.767844	0.999999	2.70124	0.999999	0.824988	0.999999	99.5445	0.999999	52.2486	0.999999
0.681013	0.999999	2.70126	0.999999	0.767905	0.999999	2.70126	0.999999	0.825016	0.999999	99.6169	0.999999	52.2492	0.999999
0.681088	0.999999	2.70129	0.999999	0.767925	0.999999	2.70129	0.999999	0.825057	0.999999	99.6645	0.999999	52.2539	0.999999
0.681105	0.999999	2.7013	0.999999	0.767957	0.999999	2.7013	0.999999	0.825069	0.999999	99.675	0.999999	52.2577	0.999999
0.681185	0.999999	2.70143	0.999999	0.767978	0.999999	2.70143	0.999999	0.825085	0.999999	99.7215	0.999999	52.2588	0.999999
0.681369	0.999999	2.70171	0.999999	0.767995	0.999999	2.70171	0.999999	0.825144	0.999999	99.7527	0.999999	52.2606	0.999999
0.681381	0.999999	2.70182	0.999999	0.768011	0.999999	2.70182	0.999999	0.825144	0.999999	99.7704	0.999999	52.2679	0.999999
0.681568	0.999999	2.70189	0.999999	0.768031	0.999999	2.70189	0.999999	0.825144	0.999999	99.7836	0.999999	52.2686	0.999999
0.681794	0.999999	2.702	0.999999	0.768041	0.999999	2.702	0.999999	0.825163	0.999999	99.7953	0.999999	52.2721	0.999999
0.681798	0.999999	2.70207	0.999999	0.768056	0.999999	2.70207	0.999999	0.825194	0.999999	99.8249	0.999999	52.2736	0.999999
0.681877	0.999999	2.70225	0.999999	0.768058	0.999999	2.70225	0.999999	0.825232	0.999999	99.8291	0.999999	52.2768	0.999999
0.682107	0.999999	2.70226	0.999999	0.7681	0.999999	2.70226	0.999999	0.825241	0.999999	99.838	0.999999	52.2846	0.999999
0.682235	0.999999	2.7023	0.999999	0.768142	0.999999	2.7023	0.999999	0.825332	0.999999	99.8478	0.999999	52.2879	0.999999
0.682367	0.999999	2.70239	0.999999	0.768195	0.999999	2.70239	0.999999	0.8254	0.999999	99.8551	0.999999	52.2883	0.999999
0.682576	0.999999	2.7024	0.999999	0.768195	0.999999	2.7024	0.999999	0.825449	0.999999	99.8592	0.999999	52.2899	0.999999
0.682684	0.999999	2.70252	0.999999	0.768234	0.999999	2.70252	0.999999	0.825465	0.999999	99.86	0.999999	52.2917	0.999999
0.682777	0.999999	2.70256	0.999999	0.768239	0.999999	2.70256	0.999999	0.825468	0.999999	99.8628	0.999999	52.2935	0.999999
0.682802	0.999999	2.70287	0.999999	0.768242	0.999999	2.70287	0.999999	0.825524	0.999999	99.886	0.999999	52.302	0.999999
0.683081	0.999999	2.70288	0.999999	0.768256	0.999999	2.70288	0.999999	0.825534	0.999999	99.9007	0.999999	52.3023	0.999999
0.683218	0.999999	2.70288	0.999999	0.768262	0.999999	2.70288	0.999999	0.825653	0.999999	99.9054	0.999999	52.3084	0.999999
0.683777	0.999999	2.70319	0.999999	0.768273	0.999999	2.70319	0.999999	0.825684	0.999999	99.9128	0.999999	52.313	0.999999
0.683918	0.999999	2.70319	0.999999	0.768287	0.999999	2.70319	0.999999	0.825701	0.999999	99.9172	0.999999	52.3141	0.999999
0.68404	0.999999	2.70325	0.999999	0.768293	0.999999	2.70325	0.999999	0.825769	0.999999	99.958	0.999999	52.3218	0.999999
0.684042	0.999999	2.70342	0.999999	0.768297	0.999999	2.70342	0.999999	0.82589	0.999999	100.007	0.999999	52.3246	0.999999
0.684051	0.999999	2.70377	0.999999	0.768305	0.999999	2.70377	0.999999	0.825973	0.999999	100.033	0.999999	52.3251	0.999999
0.684066	0.999999	2.70383	0.999999	0.76833	0.999999	2.70383	0.999999	0.825981	0.999999	100.044	0.999999	52.3394	0.999999
0.684123	0.999999	2.70388	0.999999	0.768334	0.999999	2.70388	0.999999	0.82627	0.999999	100.062	0.999999	52.3424	0.999999
0.684289	0.999999	2.7041	0.999999	0.76836	0.999999	2.7041	0.999999	0.826285	0.999999	100.145	0.999999	52.3424	0.999999
0.684291	0.999999	2.70422	0.999999	0.768393	0.999999	2.70422	0.999999	0.826305	0.999999	100.147	0.999999	52.3506	0.999999
0.684303	0.999999	2.7044	0.999999	0.768406	0.999999	2.7044	0.999999	0.826354	0.999999	100.164	0.999999	52.3528	0.999999
0.684328	0.999999	2.70496	0.999999	0.768442	0.999999	2.70496	0.999999	0.826365	0.999999	100.229	0.999999	52.3557	0.999999
0.684345	0.999999	2.70505	0.999999	0.768499	0.999999	2.70505	0.999999	0.826386	0.999999	100.241	0.999999	52.3585	0.999999
0.684346	0.999999	2.70509	0.999999	0.768521	0.999999	2.70509	0.999999	0.826425	0.999999	100.271	0.999999	52.3678	0.999999
0.68435	0.999999	2.70509	0.999999	0.768522	0.999999	2.70509	0.999999	0.826461	0.999999	100.281	0.999999	52.3756	0.999999
0.684491	0.999999	2.70524	0.999999	0.768547	0.999999	2.70524	0.999999	0.826515	0.999999	100.324	0.999999	52.3757	0.999999
0.684534	0.999999	2.70524	0.999999	0.768563	0.999999	2.70524	0.999999	0.826524	0.999999	100.326	0.999999	52.3776	0.999999
0.68484	0.999999	2.7056	0.999999	0.768587	0.999999	2.7056	0.999999	0.826538	0.999999	100.34	0.999999	52.3789	0.999999
0.685082	0.999999	2.70574	0.999999	0.76859	0.999999	2.70574	0.999999	0.826546	0.999999	100.356	0.999999	52.3812	0.999999
0.685123	0.999999	2.70604	0.999999	0.768592	0.999999	2.70604	0.999999	0.82657	0.999999	100.366	0.999999	52.3843	0.999999
0.685268	0.999999	2.70609	0.999999	0.768593	0.999999	2.70609	0.999999	0.826582	0.999999	100.376	0.999999	52.3851	0.999999
0.685268	0.999999	2.70615	0.999999	0.768597	0.999999	2.70615	0.999999	0.82662	0.999999	100.418	0.999999	52.3858	0.999999
0.685294	0.999999	2.70628	0.999999	0.768624	0.999999	2.70628	0.999999	0.826633	0.999999	100.469	0.999999	52.3887	0.999999
0.685434	0.999999	2.70629	0.999999	0.768657	0.999999	2.70629	0.999999	0.82664	0.999999	100.489	0.999999	52.3955	0.999999
0.685538	0.999999	2.70645	0.999999	0.768668	0.999999	2.70645	0.999999	0.82667	0.999999	100.511	0.999999	52.3968	0.999999
0.685717	0.999999	2.70651	0.999999	0.768683	0.999999	2.70651	0.999999	0.826686	0.999999	100.547	0.999999	52.4006	0.999999
0.685876	0.999999	2.70657	0.999999	0.76869	0.999999	2.70657	0.999999	0.826729	0.999999	100.557	0.999999	52.4049	0.999999
0.685964	0.999999	2.70662	0.999999	0.768702	0.999999	2.70662	0.999999	0.826752	0.999999	100.569	0.999999	52.4077	0.999999
0.68599	0.999999	2.70671	0.999999	0.768718	0.999999	2.70671	0.999999	0.826759	0.999999	100.651	0.999999	52.409	0.999999
0.686201	0.999999	2.70687	0.999999	0.768735	0.999999	2.70687	0.999999	0.826801	0.999999	100.654	0.999999	52.4142	0.999999
0.686755	0.999999	2.70691	0.999999	0.768743	0.999999	2.70691	0.999999	0.826822	0.999999	100.663	0.999999	52.4142	0.999999
0.686802	0.999999	2.707	0.999999	0.768753	0.999999	2.707	0.999999	0.826856	0.999999	100.666	0.999999	52.4154	0.999999
0.686852	0.999999	2.70723	0.999999	0.768773	0.999999	2.70723	0.999999	0.826976	0.999999	100.675	0.999999	52.423	0.999999
0.686894	0.999999	2.70725	0.999999	0.768784	0.999999	2.70725	0.999999	0.826988	0.999999	100.705	0.999999	52.4318	0.999999
0.686956	0.999999	2.70731	0.999999	0.7688	0.999999	2.70731	0.999999	0.826998	0.999999	100.711	0.999999	52.4388	0.999999
0.686995	0.999999	2.70758	0.999999	0.768822	0.999999	2.70758	0.999999	0.827016	0.999999	100.747	0.999999	52.4389	0.999999
0.687047	0.999999	2.70762	0.999999	0.768827	0.999999	2.70762	0.999999	0.82702	0.999999	100.761	0.999999	52.44	0.999999
0.687145	0.999999	2.70798	0.999999	0.768831	0.999999	2.70798	0.999999	0.827066	0.999999	100.782	0.999999	52.4474	0.999999
0.687156	0.999999	2.70805	0.999999	0.768831	0.999999	2.70805	0.999999	0.827083	0.999999	100.801	0.999999	52.4538	0.999999
0.68718	0.999999	2.70808	0.999999	0.768844	0.999999	2.70808	0.999999	0.827114	0.999999	100.811	0.999999	52.4586	0.999999
0.687295	0.999999	2.70809	0.999999	0.768859	0.999999	2.70809	0.999999	0.827152	0.999999	100.821	0.999999	52.4657	0.999999
0.687381	0.999999	2.70823	0.999999	0.768877	0.999999	2.70823	0.999999	0.82716	0.999999	100.828	0.999999	52.4664	0.999999
0.687489	0.999999	2.70826	0.999999	0.768944	0.999999	2.70826	0.999999	0.827256	0.999999	100.834	0.999999	52.4673	0.999999
0.687514	0.999999	2.7083	0.999999	0.768998	0.999999	2.7083	0.999999	0.827292	0.999999	100.845	0.999999	52.4733	0.999999
0.687582	0.999999	2.7084	0.999999	0.769006	0.999999	2.7084	0.999999	0.827304	0.999999	100.858	0.999999	52.4745	0.999999
0.687693	0.999999	2.7085	0.999999	0.76902	0.999999	2.7085	0.999999	0.827465	0.999999	100.872	0.999999	52.4792	0.999999
0.687885	0.999999	2.70861	0.999999	0.76905	0.999999	2.70861	0.999999	0.827479	0.999999	100.878	0.999999	52.4809	0.999999
0.687994	0.999999	2.70864	0.999999	0.769054	0.999999	2.70864	0.999999	0.827528	0.999999	100.883	0.999999	52.4892	0.999999
0.687999	0.999999	2.70865	0.999999	0.769076	0.999999	2.70865	0.999999	0.827541	0.999999	100.897	0.999999	52.4926	0.999999
0.688219	0.999999	2.70878	0.999999	0.769101	0.999999	2.70878	0.999999	0.827758	0.999999	100.931	0.999999	52.4934	0.999999
0.6883	0.999999	2.70885	0.999999	0.769102	0.999999	2.70885	0.999999	0.827813	0.999999	100.944	0.999999	52.4949	0.999999
0.688341	0.999999	2.70905	0.999999	0.769104	0.999999	2.70905	0.999999	0.82789	0.999999	101.113	0.999999	52.5006	0.999999
0.688391	0.999999	2.70913	0.999999	0.769105	0.999999	2.70913	0.999999	0.827921	0.999999	101.132	0.999999	52.5027	0.999999
0.688493	0.999999	2.70922	0.999999	0.76912	0.999999	2.70922	0.999999	0.827966	0.999999	101.16	0.999999	52.5055	0.999999
0.688506	0.999999	2.70956	0.999999	0.769135	0.999999	2.70956	0.999999	0.828075	0.999999	101.168	0.999999	52.5069	0.999999
0.688601	0.999999	2.70992	0.999999	0.769137	0.999999	2.70992	0.999999	0.828146	0.999999	101.173	0.999999	52.5076	0.999999
0.688633	0.999999	2.70997	0.999999	0.769142	0.999999	2.70997	0.999999	0.828217	0.999999	101.178	0.999999	52.5125	0.999999
0.688731	0.999999	2.71013	0.999999	0.769159	0.999999	2.71013	0.999999	0.828307	0.999999	101.192	0.999999	52.5125	0.999999
0.688838	0.999999	2.71015	0.999999	0.769163	0.999999	2.71015	0.999999	0.82834	0.999999	101.194	0.999999	52.5187	0.999999
0.688893	0.999999	2.71029	0.999999	0.769182	0.999999	2.71029	0.999999	0.828363	0.999999	101.208	0.999999	52.5229	0.999999
0.688904	0.999999	2.71047	0.999999	0.769185	0.999999	2.71047	0.999999	0.828372	0.999999	101.223	0.999999	52.5246	0.999999
0.689086	0.999999	2.7106	0.999999	0.769186	0.999999	2.7106	0.999999	0.828467	0.999999	101.228	0.999999	52.5248	0.999999
0.689194	0.999999	2.71068	0.999999	0.769205	0.999999	2.71068	0.999999	0.828475	0.999999	101.253	0.999999	52.526	0.999999
0.689223	0.999999	2.71069	0.999999	0.769251	0.999999	2.71069	0.999999	0.828476	0.999999	101.279	0.999999	52.528	0.999999
0.689341	0.999999	2.71089	0.999999	0.769261	0.999999	2.71089	0.999999	0.828521	0.999999	101.28	0.999999	52.5285	0.999999
0.689589	0.999999	2.71101	0.999999	0.769272	0.999999	2.71101	0.999999	0.828541	0.999999	101.296	0.999999	52.5308	0.999999
0.689653	0.999999	2.71109	0.999999	0.769303	0.999999	2.71109	0.999999	0.828585	0.999999	101.321	0.999999	52.5321	0.999999
0.689653	0.999999	2.71114	0.999999	0.769321	0.999999	2.71114	0.999999	0.828678	0.999999	101.333	0.999999	52.5398	0.999999
0.68979	0.999999	2.71128	0.999999	0.769327	0.999999	2.71128	0.999999	0.828881	0.999999	101.351	0.999999	52.5417	0.999999
0.689862	0.999999	2.71131	0.999999	0.769343	0.999999	2.71131	0.999999	0.828922	0.999999	101.367	0.999999	52.5429	0.999999
0.689979	0.999999	2.71157	0.999999	0.769356	0.999999	2.71157	0.999999	0.828939	0.999999	101.419	0.999999	52.5444	0.999999
0.690024	0.999999	2.71183	0.999999	0.76938	0.999999	2.71183	0.999999	0.828942	0.999999	101.42	0.999999	52.5451	0.999999
0.690539	0.999999	2.71203	0.999999	0.769395	0.999999	2.71203	0.999999	0.829026	0.999999	101.427	0.999999	52.5474	0.999999
0.690602	0.999999	2.71205	0.999999	0.769434	0.999999	2.71205	0.999999	0.829052	0.999999	101.441	0.999999	52.5478	0.999999
0.690625	0.999999	2.71237	0.999999	0.769453	0.999999	2.71237	0.999999	0.829087	0.999999	101.496	0.999999	52.5486	0.999999
0.690745	0.999999	2.71257	0.999999	0.769456	0.999999	2.71257	0.999999	0.829196	0.999999	101.505	0.999999	52.5535	0.999999
0.690941	0.999999	2.71258	0.999999	0.76947	0.999999	2.71258	0.999999	0.829211	0.999999	101.515	0.999999	52.5586	0.999999
0.691072	0.999999	2.71273	0.999999	0.76947	0.999999	2.71273	0.999999	0.829321	0.999999	101.544	0.999999	52.5647	0.999999
0.691072	0.999999	2.713	0.999999	0.769483	0.999999	2.713	0.999999	0.829353	0.999999	101.578	0.999999	52.5702	0.999999
0.691139	0.999999	2.713	0.999999	0.769483	0.999999	2.713	0.999999	0.829353	0.999999	101.579	0.999999	52.575	0.999999
0.691329	0.999999	2.71306	0.999999	0.76952	0.999999	2.71306	0.999999	0.829419	0.999999	101.606	0.999999	52.5773	0.999999
0.691338	0.999999	2.71312	0.999999	0.769564	0.999999	2.71312	0.999999	0.829457	0.999999	101.613	0.999999	52.5864	0.999999
0.691461	0.999999	2.71312	0.999999	0.769613	0.999999	2.71312	0.999999	0.829525	0.999999	101.649	0.999999	52.5883	0.999999
0.691518	0.999999	2.71322	0.999999	0.769618	0.999999	2.71322	0.999999	0.829591	0.999999	101.657	0.999999	52.5907	0.999999
0.691538	0.999999	2.71325	0.999999	0.769624	0.999999	2.71325	0.999999	0.829683	0.999999	101.663	0.999999	52.592	0.999999
0.691708	0.999999	2.71357	0.999999	0.769625	0.999999	2.71357	0.999999	0.829685	0.999999	101.668	0.999999	52.5949	0.999999
0.691883	0.999999	2.71358	0.999999	0.769631	0.999999	2.71358	0.999999	0.829705	0.999999	101.675	0.999999	52.5973	0.999999
0.691887	0.999999	2.71361	0.999999	0.769632	0.999999	2.71361	0.999999	0.829748	0.999999	101.682	0.999999	52.5973	0.999999
0.692049	0.999999	2.71381	0.999999	0.76964	0.999999	2.71381	0.999999	0.829762	0.999999	101.699	0.999999	52.6015	0.999999
0.692056	0.999999	2.71412	0.999999	0.76964	0.999999	2.71412	0.999999	0.829784	0.999999	101.716	0.999999	52.6021	0.999999
0.692358	0.999999	2.71412	0.999999	0.769682	0.999999	2.71412	0.999999	0.829858	0.999999	101.717	0.999999	52.6047	0.999999
0.692542	0.999999	2.71418	0.999999	0.769688	0.999999	2.71418	0.999999	0.829861	0.999999	101.786	0.999999	52.6062	0.999999
0.692679	0.999999	2.7142	0.999999	0.769705	0.999999	2.7142	0.999999	0.829863	0.999999	101.787	0.999999	52.6086	0.999999
0.692746	0.999999	2.71443	0.999999	0.769717	0.999999	2.71443	0.999999	0.829865	0.999999	101.792	0.999999	52.6158	0.999999
0.69279	0.999999	2.71448	0.999999	0.769723	0.999999	2.71448	0.999999	0.829962	0.999999	101.808	0.999999	52.6224	0.999999
0.692949	0.999999	2.71457	0.999999	0.769753	0.999999	2.71457	0.999999	0.830133	0.999999	101.815	0.999999	52.6293	0.999999
0.693038	0.999999	2.71467	0.999999	0.76979	0.999999	2.71467	0.999999	0.830331	0.999999	101.825	0.999999	52.6303	0.999999
0.693072	0.999999	2.71476	0.999999	0.769817	0.999999	2.71476	0.999999	0.830486	0.999999	101.836	0.999999	52.6314	0.999999
0.693283	0.999999	2.71488	0.999999	0.769817	0.999999	2.71488	0.999999	0.830505	0.999999	101.85	0.999999	52.6353	0.999999
0.693337	0.999999	2.71507	0.999999	0.769827	0.999999	2.71507	0.999999	0.830576	0.999999	101.863	0.999999	52.6416	0.999999
0.693388	0.999999	2.71513	0.999999	0.769884	0.999999	2.71513	0.999999	0.830584	0.999999	101.867	0.999999	52.6423	0.999999
0.693398	0.999999	2.71513	0.999999	0.769925	0.999999	2.71513	0.999999	0.830622	0.999999	101.875	0.999999	52.6441	0.999999
0.693581	0.999999	2.71529	0.999999	0.769961	0.999999	2.71529	0.999999	0.830642	0.999999	101.877	0.999999	52.6556	0.999999
0.693708	0.999999	2.71554	0.999999	0.769973	0.999999	2.71554	0.999999	0.830718	0.999999	101.877	0.999999	52.6565	0.999999
0.693787	0.999999	2.71597	0.999999	0.769988	0.999999	2.71597	0.999999	0.830728	0.999999	101.879	0.999999	52.6609	0.999999
0.693912	0.999999	2.71603	0.999999	0.770016	0.999999	2.71603	0.999999	0.830738	0.999999	101.882	0.999999	52.6609	0.999999
0.69396	0.999999	2.7161	0.999999	0.770029	0.999999	2.7161	0.999999	0.830819	0.999999	101.91	0.999999	52.6744	0.999999
0.694051	0.999999	2.71614	0.999999	0.770031	0.999999	2.71614	0.999999	0.830918	0.999999	101.921	0.999999	52.6782	0.999999
0.694332	0.999999	2.7162	0.999999	0.770063	0.999999	2.7162	0.999999	0.830941	0.999999	101.924	0.999999	52.6811	0.999999
0.694436	0.999999	2.71622	0.999999	0.770098	0.999999	2.71622	0.999999	0.830971	0.999999	101.948	0.999999	52.6885	0.999999
0.694764	0.999999	2.71647	0.999999	0.770103	0.999999	2.71647	0.999999	0.831002	0.999999	101.954	0.999999	52.689	0.999999
0.694807	0.999999	2.71702	0.999999	0.77011	0.999999	2.71702	0.999999	0.831154	0.999999	101.964	0.999999	52.6901	0.999999
0.694826	0.999999	2.71707	0.999999	0.770141	0.999999	2.71707	0.999999	0.831256	0.999999	101.966	0.999999	52.6904	0.999999
0.694976	0.999999	2.71728	0.999999	0.770168	0.999999	2.71728	0.999999	0.831263	0.999999	101.971	0.999999	52.6906	0.999999
0.695483	0.999999	2.71753	0.999999	0.77024	0.999999	2.71753	0.999999	0.831289	0.999999	101.972	0.999999	52.6929	0.999999
0.695626	0.999999	2.71755	0.999999	0.770244	0.999999	2.71755	0.999999	0.83134	0.999999	101.973	0.999999	52.6939	0.999999
0.695663	0.999999	2.71796	0.999999	0.770281	0.999999	2.71796	0.999999	0.831383	0.999999	101.973	0.999999	52.6949	0.999999
0.695909	0.999999	2.71805	0.999999	0.770295	0.999999	2.71805	0.999999	0.831455	0.999999	101.988	0.999999	52.699	0.999999
0.695982	0.999999	2.71828	0.999999	0.770302	0.999999	2.71828	0.999999	0.831465	0.999999	101.99	0.999999	52.7033	0.999999
0.695983	0.999999	2.71837	0.999999	0.770324	0.999999	2.71837	0.999999	0.831487	0.999999	101.997	0.999999	52.7085	0.999999
0.696129	0.999999	2.71843	0.999999	0.770338	0.999999	2.71843	0.999999	0.831607	0.999999	102.007	0.999999	52.7121	0.999999
0.696203	0.999999	2.7185	0.999999	0.770345	0.999999	2.7185	0.999999	0.831648	0.999999	102.018	0.999999	52.7137	0.999999
0.696207	0.999999	2.71854	0.999999	0.770374	0.999999	2.71854	0.999999	0.831716	0.999999	102.021	0.999999	52.7154	0.999999
0.696324	0.999999	2.71865	0.999999	0.770404	0.999999	2.71865	0.999999	0.831724	0.999999	102.023	0.999999	52.7195	0.999999
0.696509	0.999999	2.71893	0.999999	0.770456	0.999999	2.71893	0.999999	0.831738	0.999999	102.025	0.999999	52.7234	0.999999
0.696558	0.999999	2.71909	0.999999	0.770487	0.999999	2.71909	0.999999	0.831743	0.999999	102.028	0.999999	52.7269	0.999999
0.696597	0.999999	2.7191	0.999999	0.770509	0.999999	2.7191	0.999999	0.831801	0.999999	102.039	0.999999	52.7285	0.999999
0.696681	0.999999	2.71915	0.999999	0.770514	0.999999	2.71915	0.999999	0.831813	0.999999	102.043	0.999999	52.7296	0.999999
0.696724	0.999999	2.71915	0.999999	0.770515	0.999999	2.71915	0.999999	0.831843	0.999999	102.045	0.999999	52.731	0.999999
0.696759	0.999999	2.71928	0.999999	0.770517	0.999999	2.71928	0.999999	0.831855	0.999999	102.049	0.999999	52.7353	0.999999
0.697171	0.999999	2.7194	0.999999	0.770531	0.999999	2.7194	0.999999	0.832063	0.999999	102.064	0.999999	52.7389	0.999999
0.697197	0.999999	2.71972	0.999999	0.770542	0.999999	2.71972	0.999999	0.832105	0.999999	102.077	0.999999	52.7427	0.999999
0.697266	0.999999	2.71984	0.999999	0.770632	0.999999	2.71984	0.999999	0.832127	0.999999	102.084	0.999999	52.7515	0.999999
0.697429	0.999999	2.72004	0.999999	0.770651	0.999999	2.72004	0.999999	0.832134	0.999999	102.098	0.999999	52.755	0.999999
0.697686	0.999999	2.72018	0.999999	0.770695	0.999999	2.72018	0.999999	0.83219	0.999999	102.103	0.999999	52.7637	0.999999
0.698074	0.999999	2.72025	0.999999	0.770715	0.999999	2.72025	0.999999	0.832212	0.999999	102.106	0.999999	52.7645	0.999999
0.698212	0.999999	2.7204	0.999999	0.770716	0.999999	2.7204	0.999999	0.832214	0.999999	102.122	0.999999	52.7667	0.999999
0.698471	0.999999	2.72062	0.999999	0.770723	0.999999	2.72062	0.999999	0.832231	0.999999	102.125	0.999999	52.7698	0.999999
0.698555	0.999999	2.72066	0.999999	0.770729	0.999999	2.72066	0.999999	0.832281	0.999999	102.127	0.999999	52.7723	0.999999
0.698612	0.999999	2.72069	0.999999	0.770731	0.999999	2.72069	0.999999	0.83229	0.999999	102.128	0.999999	52.7768	0.999999
0.698692	0.999999	2.72092	0.999999	0.770741	0.999999	2.72092	0.999999	0.832308	0.999999	102.13	0.999999	52.7774	0.999999
0.69874	0.999999	2.72098	0.999999	0.770753	0.999999	2.72098	0.999999	0.83232	0.999999	102.141	0.999999	52.7776	0.999999
0.698829	0.999999	2.72113	0.999999	0.770756	0.999999	2.72113	0.999999	0.832367	0.999999	102.149	0.999999	52.7803	0.999999
0.698835	0.999999	2.72126	0.999999	0.770757	0.999999	2.72126	0.999999	0.832405	0.999999	102.155	0.999999	52.7808	0.999999
0.698903	0.999999	2.72127	0.999999	0.770797	0.999999	2.72127	0.999999	0.832417	0.999999	102.158	0.999999	52.781	0.999999
0.699173	0.999999	2.72132	0.999999	0.7708	0.999999	2.72132	0.999999	0.832442	0.999999	102.174	0.999999	52.7823	0.999999
0.699467	0.999999	2.72138	0.999999	0.770815	0.999999	2.72138	0.999999	0.832491	0.999999	102.188	0.999999	52.7853	0.999999
0.699467	0.999999	2.72171	0.999999	0.770816	0.999999	2.72171	0.999999	0.832494	0.999999	102.206	0.999999	52.7868	0.999999
0.699565	0.999999	2.72178	0.999999	0.770824	0.999999	2.72178	0.999999	0.832525	0.999999	102.211	0.999999	52.7892	0.999999
0.699621	0.999999	2.72181	0.999999	0.770827	0.999999	2.72181	0.999999	0.832605	0.999999	102.223	0.999999	52.7893	0.999999
0.699663	0.999999	2.7219	0.999999	0.770841	0.999999	2.7219	0.999999	0.832632	0.999999	102.224	0.999999	52.7943	0.999999
0.699693	0.999999	2.7221	0.999999	0.770857	0.999999	2.7221	0.999999	0.832699	0.999999	102.227	0.999999	52.7959	0.999999
0.699835	0.999999	2.7224	0.999999	0.770866	0.999999	2.7224	0.999999	0.832758	0.999999	102.235	0.999999	52.8016	0.999999
0.699928	0.999999	2.72252	0.999999	0.770923	0.999999	2.72252	0.999999	0.832912	0.999999	102.238	0.999999	52.804	0.999999
0.699953	0.999999	2.72255	0.999999	0.770938	0.999999	2.72255	0.999999	0.832951	0.999999	102.241	0.999999	52.8063	0.999999
0.699993	0.999999	2.72264	0.999999	0.770949	0.999999	2.72264	0.999999	0.832971	0.999999	102.242	0.999999	52.8076	0.999999
0.700331	0.999999	2.72279	0.999999	0.770955	0.999999	2.72279	0.999999	0.83306	0.999999	102.26	0.999999	52.8093	0.999999
0.700396	0.999999	2.72285	0.999999	0.770987	0.999999	2.72285	0.999999	0.833133	0.999999	102.264	0.999999	52.8142	0.999999
0.700508	0.999999	2.72288	0.999999	0.771004	0.999999	2.72288	0.999999	0.833251	0.999999	102.285	0.999999	52.8158	0.999999
0.70059	0.999999	2.72292	0.999999	0.771008	0.999999	2.72292	0.999999	0.833285	0.999999	102.29	0.999999	52.8161	0.999999
0.700787	0.999999	2.72295	0.999999	0.771018	0.999999	2.72295	0.999999	0.833378	0.999999	102.294	0.999999	52.8198	0.999999
0.70087	0.999999	2.7234	0.999999	0.771028	0.999999	2.7234	0.999999	0.833526	0.999999	102.296	0.999999	52.8235	0.999999
0.700913	0.999999	2.72344	0.999999	0.771048	0.999999	2.72344	0.999999	0.83357	0.999999	102.302	0.999999	52.8251	0.999999
0.701221	0.999999	2.72349	0.999999	0.771051	0.999999	2.72349	0.999999	0.83358	0.999999	102.302	0.999999	52.8252	0.999999
0.701231	0.999999	2.72358	0.999999	0.771056	0.999999	2.72358	0.999999	0.8336	0.999999	102.307	0.999999	52.835	0.999999
0.701313	0.999999	2.7236	0.999999	0.771069	0.999999	2.7236	0.999999	0.833616	0.999999	102.309	0.999999	52.8388	0.999999
0.701621	0.999999	2.7236	0.999999	0.771078	0.999999	2.7236	0.999999	0.833698	0.999999	102.31	0.999999	52.8419	0.999999
0.701681	0.999999	2.72375	0.999999	0.771087	0.999999	2.72375	0.999999	0.833699	0.999999	102.313	0.999999	52.8434	0.999999
0.701756	0.999999	2.72395	0.999999	0.771123	0.999999	2.72395	0.999999	0.833816	0.999999	102.314	0.999999	52.8448	0.999999
0.701885	0.999999	2.72426	0.999999	0.771142	0.999999	2.72426	0.999999	0.833899	0.999999	102.318	0.999999	52.8559	0.999999
0.701904	0.999999	2.72434	0.999999	0.771143	0.999999	2.72434	0.999999	0.833901	0.999999	102.325	0.999999	52.856	0.999999
0.702128	0.999999	2.72456	0.999999	0.771153	0.999999	2.72456	0.999999	0.833938	0.999999	102.328	0.999999	52.8572	0.999999
0.70223	0.999999	2.72458	0.999999	0.771168	0.999999	2.72458	0.999999	0.833994	0.999999	102.329	0.999999	52.8577	0.999999
0.70224	0.999999	2.72462	0.999999	0.771177	0.999999	2.72462	0.999999	0.834058	0.999999	102.332	0.999999	52.8685	0.999999
0.70232	0.999999	2.72464	0.999999	0.771205	0.999999	2.72464	0.999999	0.834151	0.999999	102.339	0.999999	52.8694	0.999999
0.702688	0.999999	2.72466	0.999999	0.771211	0.999999	2.72466	0.999999	0.834243	0.999999	102.343	0.999999	52.8706	0.999999
0.702747	0.999999	2.72482	0.999999	0.771227	0.999999	2.72482	0.999999	0.834335	0.999999	102.344	0.999999	52.8715	0.999999
0.702862	0.999999	2.72484	0.999999	0.771251	0.999999	2.72484	0.999999	0.834336	0.999999	102.349	0.999999	52.8737	0.999999
0.702892	0.999999	2.72499	0.999999	0.771264	0.999999	2.72499	0.999999	0.834368	0.999999	102.354	0.999999	52.8739	0.999999
0.702952	0.999999	2.72508	0.999999	0.771264	0.999999	2.72508	0.999999	0.834408	0.999999	102.362	0.999999	52.8799	0.999999
0.703099	0.999999	2.72508	0.999999	0.771318	0.999999	2.72508	0.999999	0.834451	0.999999	102.362	0.999999	52.8802	0.999999
0.703181	0.999999	2.72518	0.999999	0.771401	0.999999	2.72518	0.999999	0.834492	0.999999	102.388	0.999999	52.8832	0.999999
0.703205	0.999999	2.72523	0.999999	0.771414	0.999999	2.72523	0.999999	0.834533	0.999999	102.395	0.999999	52.8835	0.999999
0.703223	0.999999	2.72553	0.999999	0.771425	0.999999	2.72553	0.999999	0.834639	0.999999	102.41	0.999999	52.884	0.999999
0.703294	0.999999	2.72558	0.999999	0.771542	0.999999	2.72558	0.999999	0.834643	0.999999	102.414	0.999999	52.8875	0.999999
0.703391	0.999999	2.72567	0.999999	0.771542	0.999999	2.72567	0.999999	0.834674	0.999999	102.419	0.999999	52.8889	0.999999
0.703482	0.999999	2.72592	0.999999	0.771557	0.999999	2.72592	0.999999	0.834699	0.999999	102.422	0.999999	52.8916	0.999999
0.703482	0.999999	2.72595	0.999999	0.771557	0.999999	2.72595	0.999999	0.834793	0.999999	102.423	0.999999	52.893	0.999999
0.703498	0.999999	2.72596	0.999999	0.771607	0.999999	2.72596	0.999999	0.834897	0.999999	102.432	0.999999	52.901	0.999999
0.703702	0.999999	2.72598	0.999999	0.771648	0.999999	2.72598	0.999999	0.834908	0.999999	102.437	0.999999	52.9017	0.999999
0.703943	0.999999	2.72608	0.999999	0.771663	0.999999	2.72608	0.999999	0.834935	0.999999	102.437	0.999999	52.9086	0.999999
0.704225	0.999999	2.72611	0.999999	0.771669	0.999999	2.72611	0.999999	0.834938	0.999999	102.443	0.999999	52.9141	0.999999
0.704289	0.999999	2.72636	0.999999	0.771743	0.999999	2.72636	0.999999	0.835018	0.999999	102.444	0.999999	52.9158	0.999999
0.704338	0.999999	2.72668	0.999999	0.771765	0.999999	2.72668	0.999999	0.835093	0.999999	102.445	0.999999	52.9174	0.999999
0.704359	0.999999	2.72673	0.999999	0.771767	0.999999	2.72673	0.999999	0.835215	0.999999	102.457	0.999999	52.9229	0.999999
0.704486	0.999999	2.72682	0.999999	0.771768	0.999999	2.72682	0.999999	0.83522	0.999999	102.459	0.999999	52.9243	0.999999
0.704571	0.999999	2.72721	0.999999	0.771796	0.999999	2.72721	0.999999	0.835234	0.999999	102.462	0.999999	52.9306	0.999999
0.704605	0.999999	2.72726	0.999999	0.771798	0.999999	2.72726	0.999999	0.835237	0.999999	102.469	0.999999	52.9313	0.999999
0.704629	0.999999	2.72748	0.999999	0.771834	0.999999	2.72748	0.999999	0.835255	0.999999	102.47	0.999999	52.9382	0.999999
0.704772	0.999999	2.72753	0.999999	0.771849	0.999999	2.72753	0.999999	0.835419	0.999999	102.473	0.999999	52.9449	0.999999
0.705315	0.999999	2.72758	0.999999	0.771896	0.999999	2.72758	0.999999	0.835443	0.999999	102.475	0.999999	52.9487	0.999999
0.705519	0.999999	2.72765	0.999999	0.77192	0.999999	2.72765	0.999999	0.835449	0.999999	102.478	0.999999	52.9487	0.999999
0.705577	0.999999	2.72765	0.999999	0.771922	0.999999	2.72765	0.999999	0.835704	0.999999	102.481	0.999999	52.9571	0.999999
0.705703	0.999999	2.72767	0.999999	0.771946	0.999999	2.72767	0.999999	0.835837	0.999999	102.484	0.999999	52.9634	0.999999
0.705931	0.999999	2.72788	0.999999	0.771957	0.999999	2.72788	0.999999	0.835858	0.999999	102.489	0.999999	52.9638	0.999999
0.706052	0.999999	2.72804	0.999999	0.771973	0.999999	2.72804	0.999999	0.835862	0.999999	102.496	0.999999	52.9651	0.999999
0.706231	0.999999	2.72816	0.999999	0.771983	0.999999	2.72816	0.999999	0.835875	0.999999	102.497	0.999999	52.9663	0.999999
0.706266	0.999999	2.72843	0.999999	0.772001	0.999999	2.72843	0.999999	0.835882	0.999999	102.508	0.999999	52.9678	0.999999
0.706308	0.999999	2.72851	0.999999	0.77204	0.999999	2.72851	0.999999	0.835949	0.999999	102.511	0.999999	52.9683	0.999999
0.706479	0.999999	2.72885	0.999999	0.772067	0.999999	2.72885	0.999999	0.835959	0.999999	102.518	0.999999	52.9726	0.999999
0.706512	0.999999	2.72908	0.999999	0.772084	0.999999	2.72908	0.999999	0.836007	0.999999	102.519	0.999999	52.975	0.999999
0.706516	0.999999	2.72932	0.999999	0.772119	0.999999	2.72932	0.999999	0.83614	0.999999	102.529	0.999999	52.9757	0.999999
0.706647	0.999999	2.72938	0.999999	0.772151	0.999999	2.72938	0.999999	0.836144	0.999999	102.53	0.999999	52.9764	0.999999
0.706863	0.999999	2.72946	0.999999	0.772184	0.999999	2.72946	0.999999	0.836163	0.999999	102.53	0.999999	52.9774	0.999999
0.706919	0.999999	2.72951	0.999999	0.772186	0.999999	2.72951	0.999999	0.836252	0.999999	102.55	0.999999	52.983	0.999999
0.70705	0.999999	2.72958	0.999999	0.772214	0.999999	2.72958	0.999999	0.836271	0.999999	102.552	0.999999	52.9841	0.999999
0.707095	0.999999	2.72959	0.999999	0.772226	0.999999	2.72959	0.999999	0.836292	0.999999	102.556	0.999999	52.9859	0.999999
0.707159	0.999999	2.72975	0.999999	0.772243	0.999999	2.72975	0.999999	0.836312	0.999999	102.556	0.999999	52.991	0.999999
0.707539	0.999999	2.72995	0.999999	0.772271	0.999999	2.72995	0.999999	0.836313	0.999999	102.557	0.999999	52.9926	0.999999
0.707556	0.999999	2.73003	0.999999	0.772273	0.999999	2.73003	0.999999	0.836314	0.999999	102.563	0.999999	52.9931	0.999999
0.707585	0.999999	2.73007	0.999999	0.77229	0.999999	2.73007	0.999999	0.836327	0.999999	102.567	0.999999	52.9936	0.999999
0.707588	0.999999	2.73012	0.999999	0.77231	0.999999	2.73012	0.999999	0.83641	0.999999	102.568	0.999999	52.9989	0.999999
0.70793	0.999999	2.73042	0.999999	0.77232	0.999999	2.73042	0.999999	0.836488	0.999999	102.569	0.999999	53.0029	0.999999
0.707975	0.999999	2.73057	0.999999	0.772344	0.999999	2.73057	0.999999	0.836518	0.999999	102.57	0.999999	53.0053	0.999999
0.708092	0.999999	2.73058	0.999999	0.772348	0.999999	2.73058	0.999999	0.836519	0.999999	102.57	0.999999	53.0078	0.999999
0.708172	0.999999	2.73061	0.999999	0.772391	0.999999	2.73061	0.999999	0.836624	0.999999	102.573	0.999999	53.0086	0.999999
0.708306	0.999999	2.73089	0.999999	0.772392	0.999999	2.73089	0.999999	0.836638	0.999999	102.573	0.999999	53.0102	0.999999
0.708525	0.999999	2.73091	0.999999	0.772438	0.999999	2.73091	0.999999	0.83666	0.999999	102.577	0.999999	53.0128	0.999999
0.708617	0.999999	2.73114	0.999999	0.772468	0.999999	2.73114	0.999999	0.836709	0.999999	102.578	0.999999	53.0146	0.999999
0.708809	0.999999	2.73115	0.999999	0.772472	0.999999	2.73115	0.999999	0.836716	0.999999	102.584	0.999999	53.02	0.999999
0.70894	0.999999	2.73172	0.999999	0.772492	0.999999	2.73172	0.999999	0.836773	0.999999	102.589	0.999999	53.0279	0.999999
0.709009	0.999999	2.73201	0.999999	0.772533	0.999999	2.73201	0.999999	0.836785	0.999999	102.591	0.999999	53.0287	0.999999
0.709192	0.999999	2.73202	0.999999	0.772561	0.999999	2.73202	0.999999	0.836821	0.999999	102.596	0.999999	53.0294	0.999999
0.709287	0.999999	2.73205	0.999999	0.77257	0.999999	2.73205	0.999999	0.836886	0.999999	102.599	0.999999	53.0299	0.999999
0.709387	0.999999	2.7322	0.999999	0.772579	0.999999	2.7322	0.999999	0.836927	0.999999	102.609	0.999999	53.0346	0.999999
0.709466	0.999999	2.73224	0.999999	0.77258	0.999999	2.73224	0.999999	0.836976	0.999999	102.611	0.999999	53.0358	0.999999
0.709566	0.999999	2.73234	0.999999	0.772606	0.999999	2.73234	0.999999	0.837046	0.999999	102.613	0.999999	53.0404	0.999999
0.709586	0.999999	2.7325	0.999999	0.772607	0.999999	2.7325	0.999999	0.83705	0.999999	102.623	0.999999	53.0409	0.999999
0.709648	0.999999	2.73271	0.999999	0.772621	0.999999	2.73271	0.999999	0.837154	0.999999	102.624	0.999999	53.0431	0.999999
0.710032	0.999999	2.73271	0.999999	0.772622	0.999999	2.73271	0.999999	0.837203	0.999999	102.637	0.999999	53.0489	0.999999
0.710185	0.999999	2.73293	0.999999	0.772625	0.999999	2.73293	0.999999	0.837241	0.999999	102.643	0.999999	53.0557	0.999999
0.710219	0.999999	2.73314	0.999999	0.772628	0.999999	2.73314	0.999999	0.83741	0.999999	102.648	0.999999	53.0558	0.999999
0.710322	0.999999	2.73315	0.999999	0.772639	0.999999	2.73315	0.999999	0.837485	0.999999	102.655	0.999999	53.0599	0.999999
0.710344	0.999999	2.73319	0.999999	0.772653	0.999999	2.73319	0.999999	0.837641	0.999999	102.669	0.999999	53.0637	0.999999
0.710489	0.999999	2.73331	0.999999	0.772656	0.999999	2.73331	0.999999	0.837761	0.999999	102.67	0.999999	53.0675	0.999999
0.710614	0.999999	2.73338	0.999999	0.772666	0.999999	2.73338	0.999999	0.837837	0.999999	102.671	0.999999	53.0687	0.999999
0.710626	0.999999	2.73348	0.999999	0.772681	0.999999	2.73348	0.999999	0.837843	0.999999	102.678	0.999999	53.0713	0.999999
0.710665	0.999999	2.73374	0.999999	0.772688	0.999999	2.73374	0.999999	0.837849	0.999999	102.683	0.999999	53.0724	0.999999
0.710669	0.999999	2.7339	0.999999	0.772776	0.999999	2.7339	0.999999	0.83794	0.999999	102.685	0.999999	53.0773	0.999999
0.710796	0.999999	2.73446	0.999999	0.772815	0.999999	2.73446	0.999999	0.837964	0.999999	102.685	0.999999	53.0798	0.999999
0.710953	0.999999	2.73457	0.999999	0.772859	0.999999	2.73457	0.999999	0.83797	0.999999	102.691	0.999999	53.0858	0.999999
0.711395	0.999999	2.73472	0.999999	0.772876	0.999999	2.73472	0.999999	0.838117	0.999999	102.71	0.999999	53.0858	0.999999
0.711428	0.999999	2.73477	0.999999	0.772878	0.999999	2.73477	0.999999	0.838244	0.999999	102.713	0.999999	53.0869	0.999999
0.711441	0.999999	2.73509	0.999999	0.772891	0.999999	2.73509	0.999999	0.838252	0.999999	102.723	0.999999	53.0871	0.999999
0.711632	0.999999	2.73512	0.999999	0.772934	0.999999	2.73512	0.999999	0.838254	0.999999	102.727	0.999999	53.0897	0.999999
0.711871	0.999999	2.73527	0.999999	0.772965	0.999999	2.73527	0.999999	0.83826	0.999999	102.729	0.999999	53.0904	0.999999
0.712063	0.999999	2.73533	0.999999	0.772981	0.999999	2.73533	0.999999	0.838277	0.999999	102.735	0.999999	53.092	0.999999
0.71208	0.999999	2.73566	0.999999	0.773031	0.999999	2.73566	0.999999	0.838287	0.999999	102.751	0.999999	53.0922	0.999999
0.712083	0.999999	2.73566	0.999999	0.773038	0.999999	2.73566	0.999999	0.838327	0.999999	102.754	0.999999	53.0954	0.999999
0.712084	0.999999	2.73585	0.999999	0.773057	0.999999	2.73585	0.999999	0.838328	0.999999	102.755	0.999999	53.0959	0.999999
0.712262	0.999999	2.73587	0.999999	0.773076	0.999999	2.73587	0.999999	0.838412	0.999999	102.766	0.999999	53.0976	0.999999
0.712302	0.999999	2.73587	0.999999	0.77309	0.999999	2.73587	0.999999	0.838448	0.999999	102.767	0.999999	53.0993	0.999999
0.71253	0.999999	2.73591	0.999999	0.773126	0.999999	2.73591	0.999999	0.838505	0.999999	102.77	0.999999	53.1083	0.999999
0.712668	0.999999	2.73594	0.999999	0.773142	0.999999	2.73594	0.999999	0.838578	0.999999	102.776	0.999999	53.1132	0.999999
0.712689	0.999999	2.73595	0.999999	0.773151	0.999999	2.73595	0.999999	0.838581	0.999999	102.796	0.999999	53.1187	0.999999
0.712746	0.999999	2.73621	0.999999	0.773154	0.999999	2.73621	0.999999	0.838598	0.999999	102.803	0.999999	53.1193	0.999999
0.712757	0.999999	2.7363	0.999999	0.773177	0.999999	2.7363	0.999999	0.838732	0.999999	102.813	0.999999	53.1213	0.999999
0.712802	0.999999	2.73631	0.999999	0.773182	0.999999	2.73631	0.999999	0.838844	0.999999	102.823	0.999999	53.1234	0.999999
0.712813	0.999999	2.73632	0.999999	0.773252	0.999999	2.73632	0.999999	0.838844	0.999999	102.831	0.999999	53.1262	0.999999
0.712954	0.999999	2.73641	0.999999	0.773272	0.999999	2.73641	0.999999	0.838924	0.999999	102.836	0.999999	53.1283	0.999999
0.713088	0.999999	2.73641	0.999999	0.773302	0.999999	2.73641	0.999999	0.838956	0.999999	102.84	0.999999	53.13	0.999999
0.713185	0.999999	2.73644	0.999999	0.773315	0.999999	2.73644	0.999999	0.838962	0.999999	102.84	0.999999	53.1318	0.999999
0.71333	0.999999	2.73651	0.999999	0.77334	0.999999	2.73651	0.999999	0.839102	0.999999	102.841	0.999999	53.1319	0.999999
0.713382	0.999999	2.73702	0.999999	0.77334	0.999999	2.73702	0.999999	0.839135	0.999999	102.846	0.999999	53.1362	0.999999
0.713482	0.999999	2.73728	0.999999	0.773354	0.999999	2.73728	0.999999	0.839166	0.999999	102.848	0.999999	53.1364	0.999999
0.713581	0.999999	2.73731	0.999999	0.773357	0.999999	2.73731	0.999999	0.839268	0.999999	102.849	0.999999	53.1407	0.999999
0.713621	0.999999	2.73813	0.999999	0.773385	0.999999	2.73813	0.999999	0.839339	0.999999	102.856	0.999999	53.1421	0.999999
0.713694	0.999999	2.73822	0.999999	0.773404	0.999999	2.73822	0.999999	0.839512	0.999999	102.864	0.999999	53.1449	0.999999
0.713713	0.999999	2.73836	0.999999	0.77345	0.999999	2.73836	0.999999	0.839584	0.999999	102.866	0.999999	53.1451	0.999999
0.713905	0.999999	2.73842	0.999999	0.773467	0.999999	2.73842	0.999999	0.839599	0.999999	102.867	0.999999	53.1462	0.999999
0.713906	0.999999	2.73858	0.999999	0.773468	0.999999	2.73858	0.999999	0.839632	0.999999	102.868	0.999999	53.1518	0.999999
0.714151	0.999999	2.73878	0.999999	0.773468	0.999999	2.73878	0.999999	0.839633	0.999999	102.87	0.999999	53.1524	0.999999
0.714376	0.999999	2.73879	0.999999	0.773478	0.999999	2.73879	0.999999	0.83969	0.999999	102.873	0.999999	53.1571	0.999999
0.714906	0.999999	2.73897	0.999999	0.773498	0.999999	2.73897	0.999999	0.839702	0.999999	102.878	0.999999	53.1606	0.999999
0.714937	0.999999	2.73914	0.999999	0.773533	0.999999	2.73914	0.999999	0.839836	0.999999	102.896	0.999999	53.1609	0.999999
0.715045	0.999999	2.73924	0.999999	0.773556	0.999999	2.73924	0.999999	0.839896	0.999999	102.903	0.999999	53.1634	0.999999
0.715259	0.999999	2.73954	0.999999	0.773625	0.999999	2.73954	0.999999	0.839912	0.999999	102.907	0.999999	53.1637	0.999999
0.71544	0.999999	2.73957	0.999999	0.77366	0.999999	2.73957	0.999999	0.839917	0.999999	102.914	0.999999	53.1675	0.999999
0.715467	0.999999	2.74032	0.999999	0.773661	0.999999	2.74032	0.999999	0.839923	0.999999	102.916	0.999999	53.1684	0.999999
0.715795	0.999999	2.74053	0.999999	0.773683	0.999999	2.74053	0.999999	0.839968	0.999999	102.933	0.999999	53.1695	0.999999
0.715831	0.999999	2.74063	0.999999	0.773789	0.999999	2.74063	0.999999	0.840086	0.999999	102.933	0.999999	53.1707	0.999999
0.715844	0.999999	2.74063	0.999999	0.773789	0.999999	2.74063	0.999999	0.840103	0.999999	102.933	0.999999	53.1744	0.999999
0.716016	0.999999	2.74067	0.999999	0.773793	0.999999	2.74067	0.999999	0.840111	0.999999	102.951	0.999999	53.1793	0.999999
0.716154	0.999999	2.74075	0.999999	0.773801	0.999999	2.74075	0.999999	0.840112	0.999999	102.954	0.999999	53.1802	0.999999
0.716207	0.999999	2.74083	0.999999	0.773804	0.999999	2.74083	0.999999	0.840147	0.999999	102.958	0.999999	53.1814	0.999999
0.716242	0.999999	2.74116	0.999999	0.773804	0.999999	2.74116	0.999999	0.840203	0.999999	102.96	0.999999	53.1822	0.999999
0.716365	0.999999	2.74142	0.999999	0.773849	0.999999	2.74142	0.999999	0.840254	0.999999	102.961	0.999999	53.1842	0.999999
0.717024	0.999999	2.7417	0.999999	0.773893	0.999999	2.7417	0.999999	0.840259	0.999999	102.964	0.999999	53.1881	0.999999
0.717034	0.999999	2.74187	0.999999	0.773911	0.999999	2.74187	0.999999	0.840373	0.999999	102.972	0.999999	53.1903	0.999999
0.717305	0.999999	2.74193	0.999999	0.773914	0.999999	2.74193	0.999999	0.840377	0.999999	102.975	0.999999	53.1916	0.999999
0.717387	0.999999	2.74219	0.999999	0.773917	0.999999	2.74219	0.999999	0.840467	0.999999	102.975	0.999999	53.1923	0.999999
0.717723	0.999999	2.74228	0.999999	0.773998	0.999999	2.74228	0.999999	0.840471	0.999999	102.987	0.999999	53.1933	0.999999
0.717802	0.999999	2.74237	0.999999	0.774006	0.999999	2.74237	0.999999	0.840558	0.999999	102.993	0.999999	53.21	0.999999
0.717806	0.999999	2.74244	0.999999	0.774012	0.999999	2.74244	0.999999	0.840564	0.999999	103	0.999999	53.2164	0.999999
0.717844	0.999999	2.74249	0.999999	0.774014	0.999999	2.74249	0.999999	0.840576	0.999999	103.002	0.999999	53.2192	0.999999
0.717902	0.999999	2.74279	0.999999	0.774027	0.999999	2.74279	0.999999	0.840588	0.999999	103.016	0.999999	53.2215	0.999999
0.718077	0.999999	2.7429	0.999999	0.774031	0.999999	2.7429	0.999999	0.840617	0.999999	103.019	0.999999	53.2241	0.999999
0.718166	0.999999	2.74295	0.999999	0.774069	0.999999	2.74295	0.999999	0.840636	0.999999	103.02	0.999999	53.2304	0.999999
0.718239	0.999999	2.74305	0.999999	0.77411	0.999999	2.74305	0.999999	0.840681	0.999999	103.026	0.999999	53.2335	0.999999
0.718285	0.999999	2.74321	0.999999	0.77421	0.999999	2.74321	0.999999	0.840709	0.999999	103.029	0.999999	53.2349	0.999999
0.718286	0.999999	2.74331	0.999999	0.774215	0.999999	2.74331	0.999999	0.840756	0.999999	103.029	0.999999	53.2374	0.999999
0.718483	0.999999	2.74355	0.999999	0.77424	0.999999	2.74355	0.999999	0.840777	0.999999	103.033	0.999999	53.2381	0.999999
0.718601	0.999999	2.74364	0.999999	0.774246	0.999999	2.74364	0.999999	0.840795	0.999999	103.051	0.999999	53.2389	0.999999
0.718747	0.999999	2.74365	0.999999	0.774335	0.999999	2.74365	0.999999	0.841061	0.999999	103.063	0.999999	53.2421	0.999999
0.718788	0.999999	2.74367	0.999999	0.774352	0.999999	2.74367	0.999999	0.841087	0.999999	103.066	0.999999	53.2423	0.999999
0.718794	0.999999	2.74369	0.999999	0.774372	0.999999	2.74369	0.999999	0.841091	0.999999	103.076	0.999999	53.2439	0.999999
0.718969	0.999999	2.74371	0.999999	0.774395	0.999999	2.74371	0.999999	0.841118	0.999999	103.078	0.999999	53.2548	0.999999
0.719101	0.999999	2.74385	0.999999	0.774408	0.999999	2.74385	0.999999	0.841148	0.999999	103.08	0.999999	53.255	0.999999
0.719115	0.999999	2.74385	0.999999	0.774418	0.999999	2.74385	0.999999	0.841207	0.999999	103.088	0.999999	53.2559	0.999999
0.719182	0.999999	2.74429	0.999999	0.774422	0.999999	2.74429	0.999999	0.84129	0.999999	103.111	0.999999	53.261	0.999999
0.71926	0.999999	2.74444	0.999999	0.774437	0.999999	2.74444	0.999999	0.841307	0.999999	103.132	0.999999	53.2664	0.999999
0.719489	0.999999	2.74446	0.999999	0.774471	0.999999	2.74446	0.999999	0.841332	0.999999	103.132	0.999999	53.2678	0.999999
0.719568	0.999999	2.74451	0.999999	0.774495	0.999999	2.74451	0.999999	0.841338	0.999999	103.134	0.999999	53.2707	0.999999
0.719692	0.999999	2.74462	0.999999	0.774504	0.999999	2.74462	0.999999	0.841399	0.999999	103.139	0.999999	53.2709	0.999999
0.719798	0.999999	2.74466	0.999999	0.774531	0.999999	2.74466	0.999999	0.841434	0.999999	103.144	0.999999	53.2736	0.999999
0.719957	0.999999	2.7449	0.999999	0.774541	0.999999	2.7449	0.999999	0.841465	0.999999	103.148	0.999999	53.2749	0.999999
0.720149	0.999999	2.74507	0.999999	0.774599	0.999999	2.74507	0.999999	0.841508	0.999999	103.149	0.999999	53.2818	0.999999
0.720179	0.999999	2.74516	0.999999	0.774642	0.999999	2.74516	0.999999	0.841702	0.999999	103.159	0.999999	53.2821	0.999999
0.720316	0.999999	2.74523	0.999999	0.774642	0.999999	2.74523	0.999999	0.841725	0.999999	103.161	0.999999	53.2846	0.999999
0.720383	0.999999	2.7453	0.999999	0.774655	0.999999	2.7453	0.999999	0.841746	0.999999	103.167	0.999999	53.2886	0.999999
0.720555	0.999999	2.74558	0.999999	0.774681	0.999999	2.74558	0.999999	0.841822	0.999999	103.172	0.999999	53.2899	0.999999
0.720598	0.999999	2.74561	0.999999	0.774709	0.999999	2.74561	0.999999	0.84191	0.999999	103.182	0.999999	53.295	0.999999
0.720869	0.999999	2.7459	0.999999	0.774732	0.999999	2.7459	0.999999	0.841981	0.999999	103.187	0.999999	53.2978	0.999999
0.721146	0.999999	2.74594	0.999999	0.774736	0.999999	2.74594	0.999999	0.842099	0.999999	103.189	0.999999	53.3001	0.999999
0.721226	0.999999	2.74604	0.999999	0.774748	0.999999	2.74604	0.999999	0.842114	0.999999	103.198	0.999999	53.3012	0.999999
0.721255	0.999999	2.74608	0.999999	0.774839	0.999999	2.74608	0.999999	0.842114	0.999999	103.203	0.999999	53.3017	0.999999
0.721291	0.999999	2.74609	0.999999	0.77484	0.999999	2.74609	0.999999	0.842172	0.999999	103.206	0.999999	53.3018	0.999999
0.721438	0.999999	2.74632	0.999999	0.774842	0.999999	2.74632	0.999999	0.84219	0.999999	103.212	0.999999	53.3024	0.999999
0.721576	0.999999	2.74639	0.999999	0.774844	0.999999	2.74639	0.999999	0.842227	0.999999	103.221	0.999999	53.3072	0.999999
0.72171	0.999999	2.74651	0.999999	0.77485	0.999999	2.74651	0.999999	0.842276	0.999999	103.228	0.999999	53.3083	0.999999
0.721758	0.999999	2.74655	0.999999	0.774893	0.999999	2.74655	0.999999	0.842404	0.999999	103.236	0.999999	53.3108	0.999999
0.72197	0.999999	2.74664	0.999999	0.774912	0.999999	2.74664	0.999999	0.842441	0.999999	103.236	0.999999	53.3135	0.999999
0.72202	0.999999	2.74677	0.999999	0.774931	0.999999	2.74677	0.999999	0.842521	0.999999	103.271	0.999999	53.3138	0.999999
0.722134	0.999999	2.74683	0.999999	0.774947	0.999999	2.74683	0.999999	0.842534	0.999999	103.273	0.999999	53.314	0.999999
0.722258	0.999999	2.74695	0.999999	0.774954	0.999999	2.74695	0.999999	0.842712	0.999999	103.29	0.999999	53.3147	0.999999
0.72229	0.999999	2.747	0.999999	0.774957	0.999999	2.747	0.999999	0.842729	0.999999	103.291	0.999999	53.3157	0.999999
0.722319	0.999999	2.74715	0.999999	0.774963	0.999999	2.74715	0.999999	0.84273	0.999999	103.297	0.999999	53.3182	0.999999
0.722497	0.999999	2.74728	0.999999	0.775051	0.999999	2.74728	0.999999	0.842753	0.999999	103.302	0.999999	53.3184	0.999999
0.722561	0.999999	2.74743	0.999999	0.77506	0.999999	2.74743	0.999999	0.842809	0.999999	103.304	0.999999	53.3215	0.999999
0.722564	0.999999	2.74761	0.999999	0.775065	0.999999	2.74761	0.999999	0.842828	0.999999	103.309	0.999999	53.3281	0.999999
0.722791	0.999999	2.74788	0.999999	0.775113	0.999999	2.74788	0.999999	0.842945	0.999999	103.322	0.999999	53.3398	0.999999
0.722823	0.999999	2.74807	0.999999	0.775153	0.999999	2.74807	0.999999	0.842949	0.999999	103.328	0.999999	53.3434	0.999999
0.722983	0.999999	2.74811	0.999999	0.77517	0.999999	2.74811	0.999999	0.842956	0.999999	103.332	0.999999	53.3487	0.999999
0.723029	0.999999	2.74819	0.999999	0.775176	0.999999	2.74819	0.999999	0.843057	0.999999	103.345	0.999999	53.3521	0.999999
0.723141	0.999999	2.74824	0.999999	0.77518	0.999999	2.74824	0.999999	0.843105	0.999999	103.346	0.999999	53.353	0.999999
0.723212	0.999999	2.74827	0.999999	0.7752	0.999999	2.74827	0.999999	0.84311	0.999999	103.359	0.999999	53.3533	0.999999
0.723462	0.999999	2.74885	0.999999	0.775234	0.999999	2.74885	0.999999	0.843126	0.999999	103.384	0.999999	53.3556	0.999999
0.723611	0.999999	2.74893	0.999999	0.775242	0.999999	2.74893	0.999999	0.843205	0.999999	103.402	0.999999	53.3634	0.999999
0.723671	0.999999	2.74915	0.999999	0.775265	0.999999	2.74915	0.999999	0.84327	0.999999	103.404	0.999999	53.3745	0.999999
0.723715	0.999999	2.74921	0.999999	0.775284	0.999999	2.74921	0.999999	0.843407	0.999999	103.404	0.999999	53.3764	0.999999
0.723766	0.999999	2.74921	0.999999	0.775315	0.999999	2.74921	0.999999	0.843441	0.999999	103.415	0.999999	53.3765	0.999999
0.723819	0.999999	2.74926	0.999999	0.775373	0.999999	2.74926	0.999999	0.843531	0.999999	103.423	0.999999	53.3789	0.999999
0.723897	0.999999	2.74964	0.999999	0.775383	0.999999	2.74964	0.999999	0.843536	0.999999	103.428	0.999999	53.3837	0.999999
0.723939	0.999999	2.74968	0.999999	0.775392	0.999999	2.74968	0.999999	0.843538	0.999999	103.43	0.999999	53.3844	0.999999
0.724089	0.999999	2.75009	0.999999	0.775446	0.999999	2.75009	0.999999	0.843628	0.999999	103.436	0.999999	53.3939	0.999999
0.724245	0.999999	2.75013	0.999999	0.775451	0.999999	2.75013	0.999999	0.843634	0.999999	103.437	0.999999	53.398	0.999999
0.724473	0.999999	2.7503	0.999999	0.775494	0.999999	2.7503	0.999999	0.843641	0.999999	103.44	0.999999	53.3984	0.999999
0.725043	0.999999	2.75031	0.999999	0.775498	0.999999	2.75031	0.999999	0.84369	0.999999	103.447	0.999999	53.4046	0.999999
0.725129	0.999999	2.75037	0.999999	0.775503	0.999999	2.75037	0.999999	0.843692	0.999999	103.453	0.999999	53.4058	0.999999
0.725362	0.999999	2.75072	0.999999	0.775519	0.999999	2.75072	0.999999	0.843705	0.999999	103.455	0.999999	53.4061	0.999999
0.725371	0.999999	2.75076	0.999999	0.775528	0.999999	2.75076	0.999999	0.843773	0.999999	103.457	0.999999	53.4101	0.999999
0.725479	0.999999	2.75094	0.999999	0.77553	0.999999	2.75094	0.999999	0.843786	0.999999	103.462	0.999999	53.4121	0.999999
0.725701	0.999999	2.75097	0.999999	0.775533	0.999999	2.75097	0.999999	0.84383	0.999999	103.464	0.999999	53.4122	0.999999
0.726198	0.999999	2.75119	0.999999	0.775591	0.999999	2.75119	0.999999	0.843838	0.999999	103.465	0.999999	53.4185	0.999999
0.726332	0.999999	2.75121	0.999999	0.775608	0.999999	2.75121	0.999999	0.843867	0.999999	103.472	0.999999	53.4192	0.999999
0.726412	0.999999	2.75129	0.999999	0.775612	0.999999	2.75129	0.999999	0.843875	0.999999	103.478	0.999999	53.4202	0.999999
0.72649	0.999999	2.7513	0.999999	0.775676	0.999999	2.7513	0.999999	0.843891	0.999999	103.484	0.999999	53.4207	0.999999
0.726664	0.999999	2.7515	0.999999	0.775687	0.999999	2.7515	0.999999	0.843897	0.999999	103.484	0.999999	53.4246	0.999999
0.726713	0.999999	2.75151	0.999999	0.775696	0.999999	2.75151	0.999999	0.8439	0.999999	103.488	0.999999	53.429	0.999999
0.726856	0.999999	2.75159	0.999999	0.775767	0.999999	2.75159	0.999999	0.843994	0.999999	103.496	0.999999	53.4292	0.999999
0.726858	0.999999	2.75167	0.999999	0.775812	0.999999	2.75167	0.999999	0.843999	0.999999	103.498	0.999999	53.4313	0.999999
0.727258	0.999999	2.75191	0.999999	0.775854	0.999999	2.75191	0.999999	0.844005	0.999999	103.503	0.999999	53.4333	0.999999
0.727399	0.999999	2.75231	0.999999	0.775874	0.999999	2.75231	0.999999	0.844109	0.999999	103.506	0.999999	53.4354	0.999999
0.727409	0.999999	2.75238	0.999999	0.775877	0.999999	2.75238	0.999999	0.844306	0.999999	103.523	0.999999	53.4357	0.999999
0.727618	0.999999	2.75239	0.999999	0.775909	0.999999	2.75239	0.999999	0.844326	0.999999	103.529	0.999999	53.437	0.999999
0.727669	0.999999	2.75241	0.999999	0.77592	0.999999	2.75241	0.999999	0.844388	0.999999	103.553	0.999999	53.4375	0.999999
0.727836	0.999999	2.75258	0.999999	0.775971	0.999999	2.75258	0.999999	0.844413	0.999999	103.554	0.999999	53.4404	0.999999
0.728047	0.999999	2.75259	0.999999	0.77601	0.999999	2.75259	0.999999	0.844523	0.999999	103.554	0.999999	53.4493	0.999999
0.728547	0.999999	2.75266	0.999999	0.776035	0.999999	2.75266	0.999999	0.844545	0.999999	103.56	0.999999	53.4497	0.999999
0.728573	0.999999	2.75271	0.999999	0.776054	0.999999	2.75271	0.999999	0.844545	0.999999	103.575	0.999999	53.4508	0.999999
0.72878	0.999999	2.75275	0.999999	0.776055	0.999999	2.75275	0.999999	0.844586	0.999999	103.607	0.999999	53.451	0.999999
0.728904	0.999999	2.75288	0.999999	0.776068	0.999999	2.75288	0.999999	0.844655	0.999999	103.614	0.999999	53.4526	0.999999
0.729179	0.999999	2.75298	0.999999	0.776073	0.999999	2.75298	0.999999	0.844655	0.999999	103.621	0.999999	53.4565	0.999999
0.729341	0.999999	2.75308	0.999999	0.776083	0.999999	2.75308	0.999999	0.844672	0.999999	103.642	0.999999	53.4667	0.999999
0.729394	0.999999	2.7531	0.999999	0.776084	0.999999	2.7531	0.999999	0.844707	0.999999	103.644	0.999999	53.4723	0.999999
0.729568	0.999999	2.75325	0.999999	0.776114	0.999999	2.75325	0.999999	0.844844	0.999999	103.648	0.999999	53.4725	0.999999
0.729578	0.999999	2.75331	0.999999	0.776149	0.999999	2.75331	0.999999	0.844909	0.999999	103.65	0.999999	53.4741	0.999999
0.729593	0.999999	2.75335	0.999999	0.776156	0.999999	2.75335	0.999999	0.844996	0.999999	103.651	0.999999	53.4748	0.999999
0.729594	0.999999	2.75372	0.999999	0.776164	0.999999	2.75372	0.999999	0.84511	0.999999	103.67	0.999999	53.476	0.999999
0.729759	0.999999	2.75378	0.999999	0.776277	0.999999	2.75378	0.999999	0.845155	0.999999	103.679	0.999999	53.4851	0.999999
0.730105	0.999999	2.75389	0.999999	0.776325	0.999999	2.75389	0.999999	0.845203	0.999999	103.682	0.999999	53.4935	0.999999
0.730135	0.999999	2.7539	0.999999	0.776327	0.999999	2.7539	0.999999	0.845237	0.999999	103.702	0.999999	53.4951	0.999999
0.73016	0.999999	2.75395	0.999999	0.776338	0.999999	2.75395	0.999999	0.845254	0.999999	103.712	0.999999	53.4985	0.999999
0.730211	0.999999	2.75396	0.999999	0.776382	0.999999	2.75396	0.999999	0.845297	0.999999	103.716	0.999999	53.4985	0.999999
0.730257	0.999999	2.75412	0.999999	0.776403	0.999999	2.75412	0.999999	0.845303	0.999999	103.73	0.999999	53.4989	0.999999
0.730424	0.999999	2.7542	0.999999	0.77642	0.999999	2.7542	0.999999	0.845348	0.999999	103.737	0.999999	53.5069	0.999999
0.730445	0.999999	2.75432	0.999999	0.776422	0.999999	2.75432	0.999999	0.845397	0.999999	103.737	0.999999	53.5084	0.999999
0.730491	0.999999	2.75434	0.999999	0.776423	0.999999	2.75434	0.999999	0.845424	0.999999	103.741	0.999999	53.5108	0.999999
0.7305	0.999999	2.75484	0.999999	0.776444	0.999999	2.75484	0.999999	0.845467	0.999999	103.745	0.999999	53.5108	0.999999
0.73069	0.999999	2.75505	0.999999	0.77649	0.999999	2.75505	0.999999	0.845467	0.999999	103.749	0.999999	53.5122	0.999999
0.730793	0.999999	2.75512	0.999999	0.776504	0.999999	2.75512	0.999999	0.845487	0.999999	103.753	0.999999	53.5137	0.999999
0.730827	0.999999	2.75514	0.999999	0.776511	0.999999	2.75514	0.999999	0.845533	0.999999	103.766	0.999999	53.5201	0.999999
0.730874	0.999999	2.75518	0.999999	0.776528	0.999999	2.75518	0.999999	0.845563	0.999999	103.772	0.999999	53.5232	0.999999
0.730888	0.999999	2.75525	0.999999	0.776554	0.999999	2.75525	0.999999	0.845629	0.999999	103.774	0.999999	53.5256	0.999999
0.731012	0.999999	2.75541	0.999999	0.776591	0.999999	2.75541	0.999999	0.845693	0.999999	103.785	0.999999	53.5281	0.999999
0.731047	0.999999	2.75541	0.999999	0.776614	0.999999	2.75541	0.999999	0.845903	0.999999	103.792	0.999999	53.5323	0.999999
0.731157	0.999999	2.75584	0.999999	0.776654	0.999999	2.75584	0.999999	0.845922	0.999999	103.794	0.999999	53.5349	0.999999
0.7315	0.999999	2.75593	0.999999	0.776659	0.999999	2.75593	0.999999	0.845943	0.999999	103.8	0.999999	53.5351	0.999999
0.731537	0.999999	2.75621	0.999999	0.776711	0.999999	2.75621	0.999999	0.845944	0.999999	103.802	0.999999	53.5412	0.999999
0.731549	0.999999	2.7563	0.999999	0.776751	0.999999	2.7563	0.999999	0.84595	0.999999	103.809	0.999999	53.5425	0.999999
0.731673	0.999999	2.75639	0.999999	0.776761	0.999999	2.75639	0.999999	0.846108	0.999999	103.809	0.999999	53.5444	0.999999
0.731808	0.999999	2.75639	0.999999	0.77677	0.999999	2.75639	0.999999	0.846165	0.999999	103.824	0.999999	53.5457	0.999999
0.731896	0.999999	2.75646	0.999999	0.776792	0.999999	2.75646	0.999999	0.846178	0.999999	103.84	0.999999	53.5463	0.999999
0.731931	0.999999	2.75651	0.999999	0.776794	0.999999	2.75651	0.999999	0.84621	0.999999	103.841	0.999999	53.547	0.999999
0.732013	0.999999	2.75664	0.999999	0.776802	0.999999	2.75664	0.999999	0.846233	0.999999	103.846	0.999999	53.5479	0.999999
0.732088	0.999999	2.75664	0.999999	0.776804	0.999999	2.75664	0.999999	0.846235	0.999999	103.859	0.999999	53.5517	0.999999
0.732118	0.999999	2.75684	0.999999	0.776828	0.999999	2.75684	0.999999	0.846259	0.999999	103.871	0.999999	53.5558	0.999999
0.732361	0.999999	2.75711	0.999999	0.776841	0.999999	2.75711	0.999999	0.846264	0.999999	103.879	0.999999	53.5565	0.999999
0.732487	0.999999	2.75724	0.999999	0.776862	0.999999	2.75724	0.999999	0.846467	0.999999	103.89	0.999999	53.5612	0.999999
0.732506	0.999999	2.75766	0.999999	0.776862	0.999999	2.75766	0.999999	0.846483	0.999999	103.894	0.999999	53.5635	0.999999
0.732594	0.999999	2.75779	0.999999	0.776863	0.999999	2.75779	0.999999	0.846509	0.999999	103.899	0.999999	53.5645	0.999999
0.732648	0.999999	2.75779	0.999999	0.776885	0.999999	2.75779	0.999999	0.84653	0.999999	103.908	0.999999	53.5686	0.999999
0.732805	0.999999	2.7578	0.999999	0.77691	0.999999	2.7578	0.999999	0.846537	0.999999	103.913	0.999999	53.5691	0.999999
0.732806	0.999999	2.75808	0.999999	0.776967	0.999999	2.75808	0.999999	0.846539	0.999999	103.919	0.999999	53.5708	0.999999
0.732973	0.999999	2.7582	0.999999	0.777011	0.999999	2.7582	0.999999	0.846544	0.999999	103.92	0.999999	53.572	0.999999
0.733022	0.999999	2.75832	0.999999	0.777016	0.999999	2.75832	0.999999	0.846572	0.999999	103.926	0.999999	53.5769	0.999999
0.7332	0.999999	2.75833	0.999999	0.777016	0.999999	2.75833	0.999999	0.846644	0.999999	103.937	0.999999	53.581	0.999999
0.73334	0.999999	2.75849	0.999999	0.777069	0.999999	2.75849	0.999999	0.846775	0.999999	103.959	0.999999	53.5818	0.999999
0.733344	0.999999	2.7585	0.999999	0.777081	0.999999	2.7585	0.999999	0.846781	0.999999	103.965	0.999999	53.5836	0.999999
0.734149	0.999999	2.75857	0.999999	0.777082	0.999999	2.75857	0.999999	0.846802	0.999999	103.975	0.999999	53.5881	0.999999
0.734155	0.999999	2.7586	0.999999	0.77711	0.999999	2.7586	0.999999	0.846905	0.999999	103.976	0.999999	53.5904	0.999999
0.734405	0.999999	2.75862	0.999999	0.777126	0.999999	2.75862	0.999999	0.846905	0.999999	103.991	0.999999	53.5908	0.999999
0.734425	0.999999	2.75876	0.999999	0.777156	0.999999	2.75876	0.999999	0.846934	0.999999	103.993	0.999999	53.5908	0.999999
0.73457	0.999999	2.75891	0.999999	0.777172	0.999999	2.75891	0.999999	0.846994	0.999999	103.995	0.999999	53.5911	0.999999
0.73457	0.999999	2.75899	0.999999	0.777185	0.999999	2.75899	0.999999	0.847004	0.999999	103.997	0.999999	53.5918	0.999999
0.734793	0.999999	2.75904	0.999999	0.777198	0.999999	2.75904	0.999999	0.847011	0.999999	104.021	0.999999	53.5924	0.999999
0.734842	0.999999	2.75929	0.999999	0.77729	0.999999	2.75929	0.999999	0.847058	0.999999	104.042	0.999999	53.5933	0.999999
0.734861	0.999999	2.75933	0.999999	0.777304	0.999999	2.75933	0.999999	0.847081	0.999999	104.048	0.999999	53.6048	0.999999
0.734915	0.999999	2.75936	0.999999	0.777327	0.999999	2.75936	0.999999	0.847084	0.999999	104.072	0.999999	53.6075	0.999999
0.735166	0.999999	2.75981	0.999999	0.777335	0.999999	2.75981	0.999999	0.84709	0.999999	104.076	0.999999	53.6133	0.999999
0.735194	0.999999	2.75984	0.999999	0.777343	0.999999	2.75984	0.999999	0.847098	0.999999	104.091	0.999999	53.6148	0.999999
0.735324	0.999999	2.75986	0.999999	0.777351	0.999999	2.75986	0.999999	0.84716	0.999999	104.101	0.999999	53.6172	0.999999
0.735509	0.999999	2.76017	0.999999	0.77736	0.999999	2.76017	0.999999	0.847177	0.999999	104.105	0.999999	53.6255	0.999999
0.735575	0.999999	2.7602	0.999999	0.777403	0.999999	2.7602	0.999999	0.847217	0.999999	104.111	0.999999	53.6255	0.999999
0.735582	0.999999	2.76053	0.999999	0.777404	0.999999	2.76053	0.999999	0.847295	0.999999	104.114	0.999999	53.6281	0.999999
0.735634	0.999999	2.76085	0.999999	0.777456	0.999999	2.76085	0.999999	0.8473	0.999999	104.123	0.999999	53.6296	0.999999
0.735658	0.999999	2.761	0.999999	0.777499	0.999999	2.761	0.999999	0.847302	0.999999	104.127	0.999999	53.6304	0.999999
0.735864	0.999999	2.76115	0.999999	0.777508	0.999999	2.76115	0.999999	0.847403	0.999999	104.149	0.999999	53.634	0.999999
0.736264	0.999999	2.76117	0.999999	0.777509	0.999999	2.76117	0.999999	0.847431	0.999999	104.156	0.999999	53.6351	0.999999
0.736269	0.999999	2.76127	0.999999	0.777528	0.999999	2.76127	0.999999	0.847448	0.999999	104.162	0.999999	53.6415	0.999999
0.736509	0.999999	2.76135	0.999999	0.777545	0.999999	2.76135	0.999999	0.847484	0.999999	104.168	0.999999	53.6421	0.999999
0.736677	0.999999	2.76137	0.999999	0.777552	0.999999	2.76137	0.999999	0.84751	0.999999	104.174	0.999999	53.6427	0.999999
0.736716	0.999999	2.76156	0.999999	0.777621	0.999999	2.76156	0.999999	0.847628	0.999999	104.182	0.999999	53.6431	0.999999
0.736803	0.999999	2.76166	0.999999	0.777682	0.999999	2.76166	0.999999	0.847641	0.999999	104.183	0.999999	53.6434	0.999999
0.737027	0.999999	2.76183	0.999999	0.777696	0.999999	2.76183	0.999999	0.847756	0.999999	104.184	0.999999	53.6459	0.999999
0.737093	0.999999	2.76191	0.999999	0.777726	0.999999	2.76191	0.999999	0.847813	0.999999	104.193	0.999999	53.6522	0.999999
0.737143	0.999999	2.76197	0.999999	0.777742	0.999999	2.76197	0.999999	0.847845	0.999999	104.203	0.999999	53.6565	0.999999
0.737145	0.999999	2.762	0.999999	0.777744	0.999999	2.762	0.999999	0.847847	0.999999	104.207	0.999999	53.6662	0.999999
0.737217	0.999999	2.76203	0.999999	0.777808	0.999999	2.76203	0.999999	0.84791	0.999999	104.216	0.999999	53.6685	0.999999
0.737271	0.999999	2.76236	0.999999	0.777843	0.999999	2.76236	0.999999	0.847917	0.999999	104.229	0.999999	53.67	0.999999
0.737294	0.999999	2.76246	0.999999	0.77789	0.999999	2.76246	0.999999	0.847972	0.999999	104.229	0.999999	53.6709	0.999999
0.737568	0.999999	2.76246	0.999999	0.777943	0.999999	2.76246	0.999999	0.848004	0.999999	104.23	0.999999	53.6761	0.999999
0.737642	0.999999	2.76256	0.999999	0.777952	0.999999	2.76256	0.999999	0.848007	0.999999	104.232	0.999999	53.6762	0.999999
0.737925	0.999999	2.76261	0.999999	0.778066	0.999999	2.76261	0.999999	0.848065	0.999999	104.234	0.999999	53.6763	0.999999
0.737998	0.999999	2.76266	0.999999	0.778082	0.999999	2.76266	0.999999	0.848082	0.999999	104.24	0.999999	53.6851	0.999999
0.738052	0.999999	2.76292	0.999999	0.778084	0.999999	2.76292	0.999999	0.848083	0.999999	104.24	0.999999	53.6863	0.999999
0.738226	0.999999	2.76304	0.999999	0.778115	0.999999	2.76304	0.999999	0.848099	0.999999	104.253	0.999999	53.6923	0.999999
0.738299	0.999999	2.76308	0.999999	0.778115	0.999999	2.76308	0.999999	0.848099	0.999999	104.254	0.999999	53.6932	0.999999
0.738783	0.999999	2.76311	0.999999	0.778139	0.999999	2.76311	0.999999	0.848111	0.999999	104.254	0.999999	53.6949	0.999999
0.73895	0.999999	2.76344	0.999999	0.778159	0.999999	2.76344	0.999999	0.848127	0.999999	104.257	0.999999	53.6955	0.999999
0.738967	0.999999	2.76348	0.999999	0.778172	0.999999	2.76348	0.999999	0.84814	0.999999	104.275	0.999999	53.6992	0.999999
0.739359	0.999999	2.76349	0.999999	0.778182	0.999999	2.76349	0.999999	0.848154	0.999999	104.278	0.999999	53.7005	0.999999
0.739385	0.999999	2.76369	0.999999	0.778183	0.999999	2.76369	0.999999	0.848163	0.999999	104.28	0.999999	53.7123	0.999999
0.740397	0.999999	2.76384	0.999999	0.778187	0.999999	2.76384	0.999999	0.848188	0.999999	104.31	0.999999	53.7166	0.999999
0.740541	0.999999	2.76397	0.999999	0.778198	0.999999	2.76397	0.999999	0.848188	0.999999	104.315	0.999999	53.7216	0.999999
0.740822	0.999999	2.76431	0.999999	0.778209	0.999999	2.76431	0.999999	0.848194	0.999999	104.318	0.999999	53.7228	0.999999
0.740875	0.999999	2.76433	0.999999	0.778235	0.999999	2.76433	0.999999	0.848254	0.999999	104.32	0.999999	53.7234	0.999999
0.740935	0.999999	2.76443	0.999999	0.778257	0.999999	2.76443	0.999999	0.848396	0.999999	104.332	0.999999	53.725	0.999999
0.74095	0.999999	2.76446	0.999999	0.77826	0.999999	2.76446	0.999999	0.848443	0.999999	104.34	0.999999	53.7254	0.999999
0.740991	0.999999	2.76458	0.999999	0.77828	0.999999	2.76458	0.999999	0.848466	0.999999	104.343	0.999999	53.7344	0.999999
0.741172	0.999999	2.76471	0.999999	0.778297	0.999999	2.76471	0.999999	0.848469	0.999999	104.361	0.999999	53.7362	0.999999
0.74128	0.999999	2.76475	0.999999	0.778298	0.999999	2.76475	0.999999	0.848477	0.999999	104.367	0.999999	53.7376	0.999999
0.74151	0.999999	2.7648	0.999999	0.778315	0.999999	2.7648	0.999999	0.848504	0.999999	104.385	0.999999	53.7377	0.999999
0.741622	0.999999	2.76486	0.999999	0.778316	0.999999	2.76486	0.999999	0.848585	0.999999	104.389	0.999999	53.7436	0.999999
0.741633	0.999999	2.76494	0.999999	0.778335	0.999999	2.76494	0.999999	0.848629	0.999999	104.407	0.999999	53.7516	0.999999
0.74177	0.999999	2.76497	0.999999	0.778362	0.999999	2.76497	0.999999	0.848827	0.999999	104.414	0.999999	53.755	0.999999
0.741785	0.999999	2.76519	0.999999	0.778381	0.999999	2.76519	0.999999	0.848838	0.999999	104.418	0.999999	53.7601	0.999999
0.741954	0.999999	2.76531	0.999999	0.778407	0.999999	2.76531	0.999999	0.848881	0.999999	104.418	0.999999	53.7627	0.999999
0.742273	0.999999	2.76556	0.999999	0.778419	0.999999	2.76556	0.999999	0.848931	0.999999	104.428	0.999999	53.7634	0.999999
0.742293	0.999999	2.76566	0.999999	0.778421	0.999999	2.76566	0.999999	0.848937	0.999999	104.442	0.999999	53.7781	0.999999
0.742388	0.999999	2.76594	0.999999	0.778436	0.999999	2.76594	0.999999	0.849017	0.999999	104.446	0.999999	53.7787	0.999999
0.742454	0.999999	2.76599	0.999999	0.778444	0.999999	2.76599	0.999999	0.849031	0.999999	104.458	0.999999	53.78	0.999999
0.742536	0.999999	2.76604	0.999999	0.778479	0.999999	2.76604	0.999999	0.849042	0.999999	104.461	0.999999	53.7894	0.999999
0.742632	0.999999	2.76604	0.999999	0.77849	0.999999	2.76604	0.999999	0.849055	0.999999	104.466	0.999999	53.7955	0.999999
0.742704	0.999999	2.76606	0.999999	0.778539	0.999999	2.76606	0.999999	0.849101	0.999999	104.476	0.999999	53.7968	0.999999
0.742764	0.999999	2.76613	0.999999	0.778547	0.999999	2.76613	0.999999	0.849291	0.999999	104.479	0.999999	53.804	0.999999
0.743008	0.999999	2.76637	0.999999	0.778566	0.999999	2.76637	0.999999	0.849346	0.999999	104.481	0.999999	53.8075	0.999999
0.743022	0.999999	2.76692	0.999999	0.778578	0.999999	2.76692	0.999999	0.849418	0.999999	104.482	0.999999	53.8082	0.999999
0.743049	0.999999	2.76699	0.999999	0.778603	0.999999	2.76699	0.999999	0.849483	0.999999	104.498	0.999999	53.8085	0.999999
0.743489	0.999999	2.7671	0.999999	0.778615	0.999999	2.7671	0.999999	0.849484	0.999999	104.505	0.999999	53.8201	0.999999
0.743636	0.999999	2.76753	0.999999	0.778658	0.999999	2.76753	0.999999	0.849492	0.999999	104.508	0.999999	53.8235	0.999999
0.743719	0.999999	2.76762	0.999999	0.778661	0.999999	2.76762	0.999999	0.849523	0.999999	104.532	0.999999	53.8237	0.999999
0.744067	0.999999	2.76787	0.999999	0.778665	0.999999	2.76787	0.999999	0.849524	0.999999	104.552	0.999999	53.8361	0.999999
0.744069	0.999999	2.76803	0.999999	0.778694	0.999999	2.76803	0.999999	0.849597	0.999999	104.572	0.999999	53.8395	0.999999
0.744217	0.999999	2.76819	0.999999	0.778753	0.999999	2.76819	0.999999	0.849628	0.999999	104.576	0.999999	53.8429	0.999999
0.744219	0.999999	2.76824	0.999999	0.778782	0.999999	2.76824	0.999999	0.849655	0.999999	104.578	0.999999	53.8454	0.999999
0.744515	0.999999	2.7683	0.999999	0.778785	0.999999	2.7683	0.999999	0.84967	0.999999	104.608	0.999999	53.8478	0.999999
0.744565	0.999999	2.76861	0.999999	0.778786	0.999999	2.76861	0.999999	0.849795	0.999999	104.616	0.999999	53.8506	0.999999
0.744717	0.999999	2.76864	0.999999	0.778802	0.999999	2.76864	0.999999	0.849797	0.999999	104.621	0.999999	53.8507	0.999999
0.744812	0.999999	2.7687	0.999999	0.778845	0.999999	2.7687	0.999999	0.849798	0.999999	104.631	0.999999	53.8509	0.999999
0.744905	0.999999	2.76882	0.999999	0.778848	0.999999	2.76882	0.999999	0.849799	0.999999	104.634	0.999999	53.852	0.999999
0.745009	0.999999	2.76885	0.999999	0.778882	0.999999	2.76885	0.999999	0.849833	0.999999	104.647	0.999999	53.8521	0.999999
0.745019	0.999999	2.76908	0.999999	0.778895	0.999999	2.76908	0.999999	0.849835	0.999999	104.649	0.999999	53.8525	0.999999
0.745046	0.999999	2.7692	0.999999	0.778906	0.999999	2.7692	0.999999	0.849844	0.999999	104.662	0.999999	53.8558	0.999999
0.745115	0.999999	2.76923	0.999999	0.778918	0.999999	2.76923	0.999999	0.849914	0.999999	104.662	0.999999	53.8582	0.999999
0.745219	0.999999	2.76939	0.999999	0.778924	0.999999	2.76939	0.999999	0.849923	0.999999	104.674	0.999999	53.8652	0.999999
0.745314	0.999999	2.76948	0.999999	0.778925	0.999999	2.76948	0.999999	0.84993	0.999999	104.675	0.999999	53.8655	0.999999
0.745603	0.999999	2.76959	0.999999	0.778974	0.999999	2.76959	0.999999	0.849967	0.999999	104.695	0.999999	53.8682	0.999999
0.745659	0.999999	2.76959	0.999999	0.779002	0.999999	2.76959	0.999999	0.84997	0.999999	104.702	0.999999	53.8748	0.999999
0.745709	0.999999	2.76975	0.999999	0.779037	0.999999	2.76975	0.999999	0.850008	0.999999	104.708	0.999999	53.8774	0.999999
0.745998	0.999999	2.76991	0.999999	0.779064	0.999999	2.76991	0.999999	0.850142	0.999999	104.714	0.999999	53.8782	0.999999
0.746021	0.999999	2.77016	0.999999	0.779105	0.999999	2.77016	0.999999	0.850162	0.999999	104.715	0.999999	53.8828	0.999999
0.746147	0.999999	2.77036	0.999999	0.779135	0.999999	2.77036	0.999999	0.850185	0.999999	104.723	0.999999	53.8891	0.999999
0.746278	0.999999	2.77046	0.999999	0.779136	0.999999	2.77046	0.999999	0.8502	0.999999	104.729	0.999999	53.8926	0.999999
0.746286	0.999999	2.77066	0.999999	0.779242	0.999999	2.77066	0.999999	0.850211	0.999999	104.731	0.999999	53.8927	0.999999
0.746339	0.999999	2.77076	0.999999	0.779251	0.999999	2.77076	0.999999	0.850237	0.999999	104.74	0.999999	53.8938	0.999999
0.746441	0.999999	2.77084	0.999999	0.779278	0.999999	2.77084	0.999999	0.850255	0.999999	104.745	0.999999	53.8985	0.999999
0.74662	0.999999	2.77084	0.999999	0.779306	0.999999	2.77084	0.999999	0.850335	0.999999	104.751	0.999999	53.9057	0.999999
0.746646	0.999999	2.77086	0.999999	0.779321	0.999999	2.77086	0.999999	0.850354	0.999999	104.752	0.999999	53.9074	0.999999
0.746733	0.999999	2.77094	0.999999	0.779337	0.999999	2.77094	0.999999	0.850407	0.999999	104.752	0.999999	53.9094	0.999999
0.746767	0.999999	2.77109	0.999999	0.779384	0.999999	2.77109	0.999999	0.850424	0.999999	104.757	0.999999	53.9107	0.999999
0.74677	0.999999	2.77116	0.999999	0.779393	0.999999	2.77116	0.999999	0.850437	0.999999	104.776	0.999999	53.9136	0.999999
0.74687	0.999999	2.77129	0.999999	0.779422	0.999999	2.77129	0.999999	0.850463	0.999999	104.798	0.999999	53.9156	0.999999
0.746925	0.999999	2.77141	0.999999	0.779428	0.999999	2.77141	0.999999	0.850473	0.999999	104.805	0.999999	53.9164	0.999999
0.746936	0.999999	2.77144	0.999999	0.779475	0.999999	2.77144	0.999999	0.850477	0.999999	104.829	0.999999	53.923	0.999999
0.746973	0.999999	2.77148	0.999999	0.779521	0.999999	2.77148	0.999999	0.850485	0.999999	104.835	0.999999	53.9257	0.999999
0.747024	0.999999	2.77169	0.999999	0.779561	0.999999	2.77169	0.999999	0.850596	0.999999	104.86	0.999999	53.9267	0.999999
0.747263	0.999999	2.77206	0.999999	0.779562	0.999999	2.77206	0.999999	0.850615	0.999999	104.86	0.999999	53.93	0.999999
0.747541	0.999999	2.7721	0.999999	0.779614	0.999999	2.7721	0.999999	0.850713	0.999999	104.884	0.999999	53.9308	0.999999
0.747612	0.999999	2.77211	0.999999	0.779684	0.999999	2.77211	0.999999	0.850787	0.999999	104.902	0.999999	53.9321	0.999999
0.747634	0.999999	2.77227	0.999999	0.77972	0.999999	2.77227	0.999999	0.850796	0.999999	104.914	0.999999	53.9339	0.999999
0.747647	0.999999	2.77241	0.999999	0.779727	0.999999	2.77241	0.999999	0.850797	0.999999	104.914	0.999999	53.935	0.999999
0.748075	0.999999	2.77251	0.999999	0.779766	0.999999	2.77251	0.999999	0.85082	0.999999	104.914	0.999999	53.9442	0.999999
0.748084	0.999999	2.77253	0.999999	0.779768	0.999999	2.77253	0.999999	0.850883	0.999999	104.924	0.999999	53.9541	0.999999
0.748176	0.999999	2.77264	0.999999	0.779771	0.999999	2.77264	0.999999	0.850915	0.999999	104.925	0.999999	53.9577	0.999999
0.74818	0.999999	2.77286	0.999999	0.779794	0.999999	2.77286	0.999999	0.850919	0.999999	104.927	0.999999	53.9598	0.999999
0.748213	0.999999	2.77302	0.999999	0.779797	0.999999	2.77302	0.999999	0.85098	0.999999	104.931	0.999999	53.9619	0.999999
0.748257	0.999999	2.77318	0.999999	0.779805	0.999999	2.77318	0.999999	0.851044	0.999999	104.94	0.999999	53.9621	0.999999
0.748337	0.999999	2.77319	0.999999	0.779814	0.999999	2.77319	0.999999	0.851052	0.999999	104.95	0.999999	53.9678	0.999999
0.748361	0.999999	2.77335	0.999999	0.779825	0.999999	2.77335	0.999999	0.85113	0.999999	104.951	0.999999	53.9694	0.999999
0.748377	0.999999	2.77345	0.999999	0.779828	0.999999	2.77345	0.999999	0.851173	0.999999	104.963	0.999999	53.9695	0.999999
0.748545	0.999999	2.77354	0.999999	0.779829	0.999999	2.77354	0.999999	0.851221	0.999999	104.992	0.999999	53.9708	0.999999
0.748756	0.999999	2.77367	0.999999	0.779843	0.999999	2.77367	0.999999	0.851282	0.999999	104.992	0.999999	53.972	0.999999
0.748988	0.999999	2.77379	0.999999	0.779877	0.999999	2.77379	0.999999	0.85129	0.999999	105.006	0.999999	53.9818	0.999999
0.748997	0.999999	2.77384	0.999999	0.77988	0.999999	2.77384	0.999999	0.851297	0.999999	105.036	0.999999	53.9839	0.999999
0.74905	0.999999	2.77415	0.999999	0.779901	0.999999	2.77415	0.999999	0.851334	0.999999	105.04	0.999999	53.9936	0.999999
0.749092	0.999999	2.77432	0.999999	0.779934	0.999999	2.77432	0.999999	0.851338	0.999999	105.042	0.999999	53.9999	0.999999
0.749101	0.999999	2.77454	0.999999	0.779946	0.999999	2.77454	0.999999	0.85135	0.999999	105.056	0.999999	54.0026	0.999999
0.749125	0.999999	2.77463	0.999999	0.779968	0.999999	2.77463	0.999999	0.851364	0.999999	105.06	0.999999	54.0045	0.999999
0.749306	0.999999	2.77476	0.999999	0.779974	0.999999	2.77476	0.999999	0.851392	0.999999	105.1	0.999999	54.0103	0.999999
0.74939	0.999999	2.77487	0.999999	0.78	0.999999	2.77487	0.999999	0.851409	0.999999	105.102	0.999999	54.012	0.999999
0.749412	0.999999	2.77491	0.999999	0.780004	0.999999	2.77491	0.999999	0.851603	0.999999	105.116	0.999999	54.0135	0.999999
0.749452	0.999999	2.77495	0.999999	0.780025	0.999999	2.77495	0.999999	0.851667	0.999999	105.142	0.999999	54.018	0.999999
0.749533	0.999999	2.77516	0.999999	0.780081	0.999999	2.77516	0.999999	0.851736	0.999999	105.15	0.999999	54.0224	0.999999
0.749604	0.999999	2.77525	0.999999	0.780081	0.999999	2.77525	0.999999	0.851741	0.999999	105.166	0.999999	54.0296	0.999999
0.749613	0.999999	2.77542	0.999999	0.780123	0.999999	2.77542	0.999999	0.851757	0.999999	105.177	0.999999	54.0318	0.999999
0.749619	0.999999	2.77567	0.999999	0.780196	0.999999	2.77567	0.999999	0.851799	0.999999	105.185	0.999999	54.0325	0.999999
0.749683	0.999999	2.77567	0.999999	0.780279	0.999999	2.77567	0.999999	0.851809	0.999999	105.201	0.999999	54.0374	0.999999
0.749685	0.999999	2.7757	0.999999	0.780334	0.999999	2.7757	0.999999	0.851877	0.999999	105.213	0.999999	54.0379	0.999999
0.749721	0.999999	2.77584	0.999999	0.78035	0.999999	2.77584	0.999999	0.85189	0.999999	105.224	0.999999	54.0385	0.999999
0.749769	0.999999	2.77591	0.999999	0.780371	0.999999	2.77591	0.999999	0.851936	0.999999	105.233	0.999999	54.0417	0.999999
0.749769	0.999999	2.77593	0.999999	0.780374	0.999999	2.77593	0.999999	0.85195	0.999999	105.235	0.999999	54.0451	0.999999
0.749845	0.999999	2.77596	0.999999	0.780386	0.999999	2.77596	0.999999	0.85196	0.999999	105.235	0.999999	54.0489	0.999999
0.749888	0.999999	2.77604	0.999999	0.780409	0.999999	2.77604	0.999999	0.851964	0.999999	105.248	0.999999	54.0502	0.999999
0.74997	0.999999	2.77615	0.999999	0.780431	0.999999	2.77615	0.999999	0.851977	0.999999	105.25	0.999999	54.051	0.999999
0.750111	0.999999	2.77636	0.999999	0.780443	0.999999	2.77636	0.999999	0.852001	0.999999	105.253	0.999999	54.053	0.999999
0.750278	0.999999	2.77636	0.999999	0.780488	0.999999	2.77636	0.999999	0.852132	0.999999	105.255	0.999999	54.0541	0.999999
0.750353	0.999999	2.77644	0.999999	0.780514	0.999999	2.77644	0.999999	0.852138	0.999999	105.259	0.999999	54.0565	0.999999
0.75045	0.999999	2.77652	0.999999	0.780517	0.999999	2.77652	0.999999	0.852176	0.999999	105.261	0.999999	54.0589	0.999999
0.750471	0.999999	2.77698	0.999999	0.780528	0.999999	2.77698	0.999999	0.852191	0.999999	105.264	0.999999	54.0639	0.999999
0.751185	0.999999	2.77705	0.999999	0.780557	0.999999	2.77705	0.999999	0.852206	0.999999	105.268	0.999999	54.066	0.999999
0.751365	0.999999	2.77705	0.999999	0.780564	0.999999	2.77705	0.999999	0.852239	0.999999	105.269	0.999999	54.0674	0.999999
0.751524	0.999999	2.77708	0.999999	0.780591	0.999999	2.77708	0.999999	0.852254	0.999999	105.278	0.999999	54.0762	0.999999
0.751671	0.999999	2.77713	0.999999	0.780594	0.999999	2.77713	0.999999	0.852296	0.999999	105.279	0.999999	54.0805	0.999999
0.751854	0.999999	2.77721	0.999999	0.780598	0.999999	2.77721	0.999999	0.85232	0.999999	105.28	0.999999	54.0806	0.999999
0.75218	0.999999	2.77739	0.999999	0.780623	0.999999	2.77739	0.999999	0.852474	0.999999	105.297	0.999999	54.0814	0.999999
0.752196	0.999999	2.77749	0.999999	0.780631	0.999999	2.77749	0.999999	0.852618	0.999999	105.304	0.999999	54.0854	0.999999
0.75268	0.999999	2.7775	0.999999	0.780649	0.999999	2.7775	0.999999	0.852651	0.999999	105.31	0.999999	54.1024	0.999999
0.753274	0.999999	2.77767	0.999999	0.780751	0.999999	2.77767	0.999999	0.852654	0.999999	105.313	0.999999	54.1027	0.999999
0.753679	0.999999	2.7777	0.999999	0.780757	0.999999	2.7777	0.999999	0.852682	0.999999	105.321	0.999999	54.111	0.999999
0.753811	0.999999	2.77828	0.999999	0.780803	0.999999	2.77828	0.999999	0.852695	0.999999	105.322	0.999999	54.1134	0.999999
0.75389	0.999999	2.77831	0.999999	0.780804	0.999999	2.77831	0.999999	0.852729	0.999999	105.327	0.999999	54.1187	0.999999
0.753986	0.999999	2.77839	0.999999	0.780806	0.999999	2.77839	0.999999	0.852736	0.999999	105.329	0.999999	54.1187	0.999999
0.75419	0.999999	2.7784	0.999999	0.780852	0.999999	2.7784	0.999999	0.852754	0.999999	105.334	0.999999	54.1276	0.999999
0.754202	0.999999	2.77847	0.999999	0.780879	0.999999	2.77847	0.999999	0.852781	0.999999	105.348	0.999999	54.1303	0.999999
0.754325	0.999999	2.77855	0.999999	0.780906	0.999999	2.77855	0.999999	0.852784	0.999999	105.404	0.999999	54.1313	0.999999
0.754338	0.999999	2.77866	0.999999	0.780962	0.999999	2.77866	0.999999	0.852794	0.999999	105.406	0.999999	54.1334	0.999999
0.754376	0.999999	2.77869	0.999999	0.780968	0.999999	2.77869	0.999999	0.852856	0.999999	105.412	0.999999	54.1452	0.999999
0.754565	0.999999	2.77877	0.999999	0.780972	0.999999	2.77877	0.999999	0.852861	0.999999	105.422	0.999999	54.1484	0.999999
0.754607	0.999999	2.77881	0.999999	0.780988	0.999999	2.77881	0.999999	0.852882	0.999999	105.426	0.999999	54.1488	0.999999
0.754637	0.999999	2.77907	0.999999	0.781015	0.999999	2.77907	0.999999	0.852946	0.999999	105.433	0.999999	54.1494	0.999999
0.754682	0.999999	2.77956	0.999999	0.781029	0.999999	2.77956	0.999999	0.853057	0.999999	105.438	0.999999	54.1503	0.999999
0.754717	0.999999	2.7796	0.999999	0.781039	0.999999	2.7796	0.999999	0.853097	0.999999	105.438	0.999999	54.1512	0.999999
0.754836	0.999999	2.7797	0.999999	0.781056	0.999999	2.7797	0.999999	0.853147	0.999999	105.469	0.999999	54.1519	0.999999
0.755102	0.999999	2.77978	0.999999	0.781075	0.999999	2.77978	0.999999	0.853156	0.999999	105.475	0.999999	54.159	0.999999
0.755236	0.999999	2.77979	0.999999	0.781083	0.999999	2.77979	0.999999	0.853186	0.999999	105.494	0.999999	54.1596	0.999999
0.755325	0.999999	2.77988	0.999999	0.781097	0.999999	2.77988	0.999999	0.853345	0.999999	105.507	0.999999	54.1656	0.999999
0.755642	0.999999	2.78005	0.999999	0.781183	0.999999	2.78005	0.999999	0.853381	0.999999	105.518	0.999999	54.167	0.999999
0.755883	0.999999	2.78006	0.999999	0.781185	0.999999	2.78006	0.999999	0.853394	0.999999	105.518	0.999999	54.1688	0.999999
0.755892	0.999999	2.78011	0.999999	0.781191	0.999999	2.78011	0.999999	0.853406	0.999999	105.531	0.999999	54.1688	0.999999
0.755926	0.999999	2.78029	0.999999	0.781198	0.999999	2.78029	0.999999	0.853459	0.999999	105.531	0.999999	54.171	0.999999
0.755985	0.999999	2.7803	0.999999	0.781267	0.999999	2.7803	0.999999	0.853464	0.999999	105.534	0.999999	54.1728	0.999999
0.756209	0.999999	2.78032	0.999999	0.781316	0.999999	2.78032	0.999999	0.853491	0.999999	105.55	0.999999	54.1741	0.999999
0.756231	0.999999	2.7807	0.999999	0.781331	0.999999	2.7807	0.999999	0.853496	0.999999	105.551	0.999999	54.1831	0.999999
0.756844	0.999999	2.78099	0.999999	0.781335	0.999999	2.78099	0.999999	0.853601	0.999999	105.552	0.999999	54.1838	0.999999
0.757023	0.999999	2.78117	0.999999	0.781351	0.999999	2.78117	0.999999	0.853684	0.999999	105.563	0.999999	54.189	0.999999
0.757284	0.999999	2.7812	0.999999	0.781372	0.999999	2.7812	0.999999	0.853684	0.999999	105.567	0.999999	54.1904	0.999999
0.757304	0.999999	2.78122	0.999999	0.781404	0.999999	2.78122	0.999999	0.853692	0.999999	105.58	0.999999	54.1996	0.999999
0.757357	0.999999	2.78134	0.999999	0.78142	0.999999	2.78134	0.999999	0.853734	0.999999	105.603	0.999999	54.2008	0.999999
0.757365	0.999999	2.78134	0.999999	0.781463	0.999999	2.78134	0.999999	0.85377	0.999999	105.622	0.999999	54.2071	0.999999
0.757544	0.999999	2.78135	0.999999	0.781468	0.999999	2.78135	0.999999	0.853864	0.999999	105.629	0.999999	54.2072	0.999999
0.757878	0.999999	2.78153	0.999999	0.781487	0.999999	2.78153	0.999999	0.853871	0.999999	105.629	0.999999	54.2083	0.999999
0.758132	0.999999	2.78179	0.999999	0.781493	0.999999	2.78179	0.999999	0.853938	0.999999	105.668	0.999999	54.2106	0.999999
0.758156	0.999999	2.78182	0.999999	0.781516	0.999999	2.78182	0.999999	0.853979	0.999999	105.685	0.999999	54.2107	0.999999
0.758284	0.999999	2.78195	0.999999	0.781526	0.999999	2.78195	0.999999	0.854023	0.999999	105.686	0.999999	54.2129	0.999999
0.75837	0.999999	2.78201	0.999999	0.781542	0.999999	2.78201	0.999999	0.854093	0.999999	105.695	0.999999	54.2213	0.999999
0.75841	0.999999	2.78218	0.999999	0.781565	0.999999	2.78218	0.999999	0.854107	0.999999	105.724	0.999999	54.2253	0.999999
0.75843	0.999999	2.78219	0.999999	0.78157	0.999999	2.78219	0.999999	0.854114	0.999999	105.736	0.999999	54.2362	0.999999
0.758765	0.999999	2.78249	0.999999	0.781615	0.999999	2.78249	0.999999	0.854156	0.999999	105.744	0.999999	54.237	0.999999
0.758801	0.999999	2.78278	0.999999	0.781633	0.999999	2.78278	0.999999	0.854193	0.999999	105.744	0.999999	54.2393	0.999999
0.758887	0.999999	2.78322	0.999999	0.781671	0.999999	2.78322	0.999999	0.854221	0.999999	105.772	0.999999	54.2557	0.999999
0.75895	0.999999	2.78332	0.999999	0.781773	0.999999	2.78332	0.999999	0.854222	0.999999	105.777	0.999999	54.2565	0.999999
0.758955	0.999999	2.78358	0.999999	0.781774	0.999999	2.78358	0.999999	0.854261	0.999999	105.787	0.999999	54.2703	0.999999
0.759037	0.999999	2.78374	0.999999	0.781789	0.999999	2.78374	0.999999	0.854277	0.999999	105.793	0.999999	54.271	0.999999
0.759243	0.999999	2.78376	0.999999	0.781837	0.999999	2.78376	0.999999	0.854287	0.999999	105.794	0.999999	54.2726	0.999999
0.759255	0.999999	2.78377	0.999999	0.781852	0.999999	2.78377	0.999999	0.854346	0.999999	105.811	0.999999	54.2729	0.999999
0.759262	0.999999	2.78381	0.999999	0.781855	0.999999	2.78381	0.999999	0.854378	0.999999	105.813	0.999999	54.2737	0.999999
0.759291	0.999999	2.78387	0.999999	0.781864	0.999999	2.78387	0.999999	0.854385	0.999999	105.841	0.999999	54.2742	0.999999
0.759329	0.999999	2.78388	0.999999	0.78188	0.999999	2.78388	0.999999	0.854443	0.999999	105.845	0.999999	54.2746	0.999999
0.759405	0.999999	2.78399	0.999999	0.781894	0.999999	2.78399	0.999999	0.854457	0.999999	105.854	0.999999	54.2751	0.999999
0.759433	0.999999	2.78402	0.999999	0.781905	0.999999	2.78402	0.999999	0.854458	0.999999	105.885	0.999999	54.2796	0.999999
0.759444	0.999999	2.78415	0.999999	0.78194	0.999999	2.78415	0.999999	0.854489	0.999999	105.899	0.999999	54.2798	0.999999
0.759556	0.999999	2.7842	0.999999	0.781976	0.999999	2.7842	0.999999	0.854559	0.999999	105.902	0.999999	54.2805	0.999999
0.759567	0.999999	2.78422	0.999999	0.78198	0.999999	2.78422	0.999999	0.854574	0.999999	105.903	0.999999	54.2822	0.999999
0.759632	0.999999	2.78436	0.999999	0.782019	0.999999	2.78436	0.999999	0.854584	0.999999	105.919	0.999999	54.2831	0.999999
0.759638	0.999999	2.78444	0.999999	0.782061	0.999999	2.78444	0.999999	0.854606	0.999999	105.922	0.999999	54.2845	0.999999
0.759687	0.999999	2.78465	0.999999	0.782075	0.999999	2.78465	0.999999	0.854623	0.999999	105.925	0.999999	54.285	0.999999
0.759705	0.999999	2.78468	0.999999	0.78208	0.999999	2.78468	0.999999	0.854676	0.999999	105.952	0.999999	54.2864	0.999999
0.759874	0.999999	2.78477	0.999999	0.782103	0.999999	2.78477	0.999999	0.854707	0.999999	105.954	0.999999	54.2869	0.999999
0.760024	0.999999	2.78477	0.999999	0.782118	0.999999	2.78477	0.999999	0.854707	0.999999	105.979	0.999999	54.2875	0.999999
0.760109	0.999999	2.78479	0.999999	0.782126	0.999999	2.78479	0.999999	0.854713	0.999999	105.986	0.999999	54.2887	0.999999
0.760157	0.999999	2.78499	0.999999	0.782148	0.999999	2.78499	0.999999	0.854738	0.999999	105.989	0.999999	54.2924	0.999999
0.760213	0.999999	2.78504	0.999999	0.782154	0.999999	2.78504	0.999999	0.854764	0.999999	105.999	0.999999	54.2962	0.999999
0.760473	0.999999	2.7854	0.999999	0.782186	0.999999	2.7854	0.999999	0.854772	0.999999	106.001	0.999999	54.3027	0.999999
0.760595	0.999999	2.78553	0.999999	0.782201	0.999999	2.78553	0.999999	0.854802	0.999999	106.009	0.999999	54.3029	0.999999
0.760659	0.999999	2.78553	0.999999	0.78222	0.999999	2.78553	0.999999	0.854815	0.999999	106.01	0.999999	54.3045	0.999999
0.760677	0.999999	2.78572	0.999999	0.782236	0.999999	2.78572	0.999999	0.854825	0.999999	106.029	0.999999	54.3049	0.999999
0.760807	0.999999	2.78593	0.999999	0.782263	0.999999	2.78593	0.999999	0.854881	0.999999	106.06	0.999999	54.3115	0.999999
0.760906	0.999999	2.78598	0.999999	0.782269	0.999999	2.78598	0.999999	0.854908	0.999999	106.075	0.999999	54.3126	0.999999
0.760913	0.999999	2.78606	0.999999	0.782271	0.999999	2.78606	0.999999	0.855044	0.999999	106.077	0.999999	54.3169	0.999999
0.760993	0.999999	2.78621	0.999999	0.782289	0.999999	2.78621	0.999999	0.855087	0.999999	106.082	0.999999	54.3199	0.999999
0.761159	0.999999	2.78633	0.999999	0.782296	0.999999	2.78633	0.999999	0.855166	0.999999	106.088	0.999999	54.3254	0.999999
0.761164	0.999999	2.7864	0.999999	0.782331	0.999999	2.7864	0.999999	0.855168	0.999999	106.123	0.999999	54.3279	0.999999
0.761236	0.999999	2.78649	0.999999	0.782334	0.999999	2.78649	0.999999	0.855177	0.999999	106.145	0.999999	54.3318	0.999999
0.76148	0.999999	2.78652	0.999999	0.782336	0.999999	2.78652	0.999999	0.855178	0.999999	106.153	0.999999	54.3362	0.999999
0.761528	0.999999	2.78656	0.999999	0.782341	0.999999	2.78656	0.999999	0.85518	0.999999	106.171	0.999999	54.3399	0.999999
0.76159	0.999999	2.7867	0.999999	0.782379	0.999999	2.7867	0.999999	0.85519	0.999999	106.175	0.999999	54.3423	0.999999
0.761608	0.999999	2.78673	0.999999	0.782488	0.999999	2.78673	0.999999	0.855215	0.999999	106.179	0.999999	54.3432	0.999999
0.761736	0.999999	2.78704	0.999999	0.782495	0.999999	2.78704	0.999999	0.855244	0.999999	106.188	0.999999	54.356	0.999999
0.761758	0.999999	2.78711	0.999999	0.782512	0.999999	2.78711	0.999999	0.855417	0.999999	106.199	0.999999	54.3581	0.999999
0.762021	0.999999	2.78714	0.999999	0.782579	0.999999	2.78714	0.999999	0.855428	0.999999	106.207	0.999999	54.3642	0.999999
0.762049	0.999999	2.78723	0.999999	0.782604	0.999999	2.78723	0.999999	0.855456	0.999999	106.229	0.999999	54.3664	0.999999
0.762068	0.999999	2.78724	0.999999	0.78261	0.999999	2.78724	0.999999	0.855467	0.999999	106.233	0.999999	54.3699	0.999999
0.762125	0.999999	2.78727	0.999999	0.782618	0.999999	2.78727	0.999999	0.855495	0.999999	106.234	0.999999	54.3731	0.999999
0.762171	0.999999	2.78741	0.999999	0.78263	0.999999	2.78741	0.999999	0.855536	0.999999	106.235	0.999999	54.3768	0.999999
0.762318	0.999999	2.78749	0.999999	0.782634	0.999999	2.78749	0.999999	0.855547	0.999999	106.262	0.999999	54.3775	0.999999
0.762419	0.999999	2.7875	0.999999	0.782637	0.999999	2.7875	0.999999	0.855568	0.999999	106.262	0.999999	54.378	0.999999
0.762475	0.999999	2.78758	0.999999	0.782675	0.999999	2.78758	0.999999	0.855603	0.999999	106.278	0.999999	54.384	0.999999
0.762478	0.999999	2.78763	0.999999	0.782745	0.999999	2.78763	0.999999	0.855684	0.999999	106.331	0.999999	54.3846	0.999999
0.762895	0.999999	2.78816	0.999999	0.782816	0.999999	2.78816	0.999999	0.85572	0.999999	106.36	0.999999	54.3923	0.999999
0.762932	0.999999	2.78818	0.999999	0.78283	0.999999	2.78818	0.999999	0.855775	0.999999	106.375	0.999999	54.3934	0.999999
0.762955	0.999999	2.78819	0.999999	0.782856	0.999999	2.78819	0.999999	0.855803	0.999999	106.383	0.999999	54.3937	0.999999
0.762977	0.999999	2.7882	0.999999	0.782866	0.999999	2.7882	0.999999	0.85591	0.999999	106.388	0.999999	54.3952	0.999999
0.763304	0.999999	2.78852	0.999999	0.78288	0.999999	2.78852	0.999999	0.855944	0.999999	106.391	0.999999	54.4025	0.999999
0.763352	0.999999	2.78853	0.999999	0.782883	0.999999	2.78853	0.999999	0.855955	0.999999	106.401	0.999999	54.4037	0.999999
0.763395	0.999999	2.78854	0.999999	0.782902	0.999999	2.78854	0.999999	0.855973	0.999999	106.407	0.999999	54.4056	0.999999
0.763426	0.999999	2.7886	0.999999	0.782913	0.999999	2.7886	0.999999	0.855976	0.999999	106.408	0.999999	54.4068	0.999999
0.763571	0.999999	2.78868	0.999999	0.782921	0.999999	2.78868	0.999999	0.856045	0.999999	106.419	0.999999	54.409	0.999999
0.76368	0.999999	2.78881	0.999999	0.78296	0.999999	2.78881	0.999999	0.856048	0.999999	106.421	0.999999	54.4092	0.999999
0.763811	0.999999	2.78891	0.999999	0.783001	0.999999	2.78891	0.999999	0.856054	0.999999	106.424	0.999999	54.4119	0.999999
0.763864	0.999999	2.78913	0.999999	0.783019	0.999999	2.78913	0.999999	0.856071	0.999999	106.431	0.999999	54.4128	0.999999
0.763925	0.999999	2.78952	0.999999	0.783051	0.999999	2.78952	0.999999	0.856076	0.999999	106.434	0.999999	54.4198	0.999999
0.763952	0.999999	2.79	0.999999	0.783061	0.999999	2.79	0.999999	0.856107	0.999999	106.436	0.999999	54.4199	0.999999
0.764029	0.999999	2.79012	0.999999	0.783071	0.999999	2.79012	0.999999	0.856157	0.999999	106.463	0.999999	54.4212	0.999999
0.764364	0.999999	2.79021	0.999999	0.783071	0.999999	2.79021	0.999999	0.856181	0.999999	106.469	0.999999	54.422	0.999999
0.76438	0.999999	2.79025	0.999999	0.783073	0.999999	2.79025	0.999999	0.856192	0.999999	106.471	0.999999	54.425	0.999999
0.764505	0.999999	2.79038	0.999999	0.783084	0.999999	2.79038	0.999999	0.856236	0.999999	106.484	0.999999	54.4257	0.999999
0.764833	0.999999	2.79055	0.999999	0.783139	0.999999	2.79055	0.999999	0.856257	0.999999	106.486	0.999999	54.4263	0.999999
0.764855	0.999999	2.79061	0.999999	0.7832	0.999999	2.79061	0.999999	0.856277	0.999999	106.495	0.999999	54.4281	0.999999
0.765236	0.999999	2.79089	0.999999	0.783208	0.999999	2.79089	0.999999	0.856285	0.999999	106.506	0.999999	54.4294	0.999999
0.765262	0.999999	2.79098	0.999999	0.783272	0.999999	2.79098	0.999999	0.856292	0.999999	106.515	0.999999	54.4349	0.999999
0.765497	0.999999	2.79123	0.999999	0.783278	0.999999	2.79123	0.999999	0.856325	0.999999	106.541	0.999999	54.4377	0.999999
0.765573	0.999999	2.79133	0.999999	0.783279	0.999999	2.79133	0.999999	0.856341	0.999999	106.543	0.999999	54.4417	0.999999
0.765752	0.999999	2.79133	0.999999	0.783296	0.999999	2.79133	0.999999	0.85635	0.999999	106.546	0.999999	54.4418	0.999999
0.766057	0.999999	2.79154	0.999999	0.783299	0.999999	2.79154	0.999999	0.856362	0.999999	106.547	0.999999	54.4429	0.999999
0.76614	0.999999	2.79171	0.999999	0.783304	0.999999	2.79171	0.999999	0.856367	0.999999	106.549	0.999999	54.447	0.999999
0.766224	0.999999	2.79172	0.999999	0.78331	0.999999	2.79172	0.999999	0.856397	0.999999	106.557	0.999999	54.4483	0.999999
0.766434	0.999999	2.79177	0.999999	0.783358	0.999999	2.79177	0.999999	0.856415	0.999999	106.583	0.999999	54.45	0.999999
0.766757	0.999999	2.7919	0.999999	0.783361	0.999999	2.7919	0.999999	0.856429	0.999999	106.592	0.999999	54.4516	0.999999
0.766997	0.999999	2.792	0.999999	0.783362	0.999999	2.792	0.999999	0.856481	0.999999	106.593	0.999999	54.4542	0.999999
0.767039	0.999999	2.79212	0.999999	0.783372	0.999999	2.79212	0.999999	0.856513	0.999999	106.607	0.999999	54.4554	0.999999
0.767054	0.999999	2.79213	0.999999	0.783383	0.999999	2.79213	0.999999	0.856515	0.999999	106.632	0.999999	54.4565	0.999999
0.767125	0.999999	2.79213	0.999999	0.783398	0.999999	2.79213	0.999999	0.856525	0.999999	106.643	0.999999	54.4576	0.999999
0.767331	0.999999	2.79216	0.999999	0.783459	0.999999	2.79216	0.999999	0.856551	0.999999	106.644	0.999999	54.4658	0.999999
0.767998	0.999999	2.79247	0.999999	0.78356	0.999999	2.79247	0.999999	0.856553	0.999999	106.664	0.999999	54.4718	0.999999
0.768023	0.999999	2.79249	0.999999	0.783622	0.999999	2.79249	0.999999	0.856558	0.999999	106.664	0.999999	54.4761	0.999999
0.76817	0.999999	2.79251	0.999999	0.783623	0.999999	2.79251	0.999999	0.856566	0.999999	106.686	0.999999	54.4786	0.999999
0.768554	0.999999	2.79251	0.999999	0.783664	0.999999	2.79251	0.999999	0.856585	0.999999	106.696	0.999999	54.4806	0.999999
0.768952	0.999999	2.79271	0.999999	0.783686	0.999999	2.79271	0.999999	0.856594	0.999999	106.698	0.999999	54.4843	0.999999
0.768987	0.999999	2.79306	0.999999	0.783703	0.999999	2.79306	0.999999	0.856602	0.999999	106.706	0.999999	54.4857	0.999999
0.769025	0.999999	2.79307	0.999999	0.783763	0.999999	2.79307	0.999999	0.856645	0.999999	106.728	0.999999	54.4955	0.999999
0.769132	0.999999	2.79326	0.999999	0.783809	0.999999	2.79326	0.999999	0.856655	0.999999	106.73	0.999999	54.5065	0.999999
0.769197	0.999999	2.79337	0.999999	0.783866	0.999999	2.79337	0.999999	0.856684	0.999999	106.734	0.999999	54.5126	0.999999
0.769311	0.999999	2.79377	0.999999	0.783869	0.999999	2.79377	0.999999	0.856701	0.999999	106.735	0.999999	54.5135	0.999999
0.769417	0.999999	2.79379	0.999999	0.783907	0.999999	2.79379	0.999999	0.856719	0.999999	106.738	0.999999	54.5148	0.999999
0.769524	0.999999	2.7941	0.999999	0.78398	0.999999	2.7941	0.999999	0.856742	0.999999	106.75	0.999999	54.5201	0.999999
0.769641	0.999999	2.79413	0.999999	0.783997	0.999999	2.79413	0.999999	0.856849	0.999999	106.77	0.999999	54.5211	0.999999
0.769964	0.999999	2.7942	0.999999	0.784015	0.999999	2.7942	0.999999	0.856878	0.999999	106.779	0.999999	54.5286	0.999999
0.770175	0.999999	2.79421	0.999999	0.784041	0.999999	2.79421	0.999999	0.856908	0.999999	106.785	0.999999	54.5295	0.999999
0.770291	0.999999	2.79445	0.999999	0.784067	0.999999	2.79445	0.999999	0.856909	0.999999	106.796	0.999999	54.5333	0.999999
0.770329	0.999999	2.7945	0.999999	0.784079	0.999999	2.7945	0.999999	0.856923	0.999999	106.797	0.999999	54.5374	0.999999
0.770386	0.999999	2.79462	0.999999	0.784085	0.999999	2.79462	0.999999	0.856926	0.999999	106.818	0.999999	54.5377	0.999999
0.770499	0.999999	2.79488	0.999999	0.784105	0.999999	2.79488	0.999999	0.857016	0.999999	106.821	0.999999	54.5504	0.999999
0.770525	0.999999	2.79499	0.999999	0.784122	0.999999	2.79499	0.999999	0.857045	0.999999	106.845	0.999999	54.5543	0.999999
0.77053	0.999999	2.79507	0.999999	0.784144	0.999999	2.79507	0.999999	0.857053	0.999999	106.849	0.999999	54.5564	0.999999
0.770579	0.999999	2.79509	0.999999	0.784157	0.999999	2.79509	0.999999	0.857086	0.999999	106.867	0.999999	54.5653	0.999999
0.770636	0.999999	2.79531	0.999999	0.78417	0.999999	2.79531	0.999999	0.857103	0.999999	106.871	0.999999	54.5674	0.999999
0.77081	0.999999	2.79531	0.999999	0.784209	0.999999	2.79531	0.999999	0.857119	0.999999	106.902	0.999999	54.5678	0.999999
0.771002	0.999999	2.79535	0.999999	0.784234	0.999999	2.79535	0.999999	0.857123	0.999999	106.968	0.999999	54.5684	0.999999
0.771058	0.999999	2.79539	0.999999	0.784269	0.999999	2.79539	0.999999	0.857137	0.999999	106.973	0.999999	54.5704	0.999999
0.771088	0.999999	2.79546	0.999999	0.784336	0.999999	2.79546	0.999999	0.857151	0.999999	106.996	0.999999	54.5712	0.999999
0.771131	0.999999	2.79549	0.999999	0.784342	0.999999	2.79549	0.999999	0.857154	0.999999	107.021	0.999999	54.5773	0.999999
0.771199	0.999999	2.79568	0.999999	0.784348	0.999999	2.79568	0.999999	0.857162	0.999999	107.022	0.999999	54.5846	0.999999
0.771223	0.999999	2.7958	0.999999	0.784361	0.999999	2.7958	0.999999	0.857165	0.999999	107.026	0.999999	54.5852	0.999999
0.771454	0.999999	2.796	0.999999	0.784363	0.999999	2.796	0.999999	0.857168	0.999999	107.027	0.999999	54.5856	0.999999
0.771489	0.999999	2.79606	0.999999	0.784364	0.999999	2.79606	0.999999	0.857244	0.999999	107.032	0.999999	54.592	0.999999
0.771604	0.999999	2.79619	0.999999	0.784387	0.999999	2.79619	0.999999	0.857249	0.999999	107.034	0.999999	54.5927	0.999999
0.771706	0.999999	2.79651	0.999999	0.784399	0.999999	2.79651	0.999999	0.857267	0.999999	107.081	0.999999	54.593	0.999999
0.771723	0.999999	2.79651	0.999999	0.784434	0.999999	2.79651	0.999999	0.857293	0.999999	107.116	0.999999	54.5934	0.999999
0.771905	0.999999	2.79654	0.999999	0.784473	0.999999	2.79654	0.999999	0.857349	0.999999	107.118	0.999999	54.5935	0.999999
0.772127	0.999999	2.79663	0.999999	0.784474	0.999999	2.79663	0.999999	0.857357	0.999999	107.12	0.999999	54.5977	0.999999
0.772212	0.999999	2.7968	0.999999	0.784495	0.999999	2.7968	0.999999	0.85742	0.999999	107.132	0.999999	54.6033	0.999999
0.77229	0.999999	2.79696	0.999999	0.784512	0.999999	2.79696	0.999999	0.857424	0.999999	107.146	0.999999	54.6075	0.999999
0.772302	0.999999	2.797	0.999999	0.784523	0.999999	2.797	0.999999	0.857453	0.999999	107.175	0.999999	54.608	0.999999
0.77247	0.999999	2.79703	0.999999	0.784561	0.999999	2.79703	0.999999	0.857454	0.999999	107.182	0.999999	54.6196	0.999999
0.772558	0.999999	2.79714	0.999999	0.784566	0.999999	2.79714	0.999999	0.857462	0.999999	107.189	0.999999	54.62	0.999999
0.7726	0.999999	2.79722	0.999999	0.784625	0.999999	2.79722	0.999999	0.857514	0.999999	107.19	0.999999	54.6229	0.999999
0.772824	0.999999	2.79724	0.999999	0.784633	0.999999	2.79724	0.999999	0.857514	0.999999	107.2	0.999999	54.6256	0.999999
0.772922	0.999999	2.79734	0.999999	0.784633	0.999999	2.79734	0.999999	0.857522	0.999999	107.226	0.999999	54.6311	0.999999
0.773059	0.999999	2.79734	0.999999	0.784687	0.999999	2.79734	0.999999	0.857539	0.999999	107.237	0.999999	54.6342	0.999999
0.773162	0.999999	2.79751	0.999999	0.784707	0.999999	2.79751	0.999999	0.857546	0.999999	107.267	0.999999	54.6347	0.999999
0.773236	0.999999	2.79775	0.999999	0.784726	0.999999	2.79775	0.999999	0.85757	0.999999	107.283	0.999999	54.639	0.999999
0.773322	0.999999	2.79786	0.999999	0.784727	0.999999	2.79786	0.999999	0.857683	0.999999	107.299	0.999999	54.6403	0.999999
0.773402	0.999999	2.79788	0.999999	0.784754	0.999999	2.79788	0.999999	0.857705	0.999999	107.305	0.999999	54.6464	0.999999
0.77341	0.999999	2.79794	0.999999	0.784792	0.999999	2.79794	0.999999	0.857713	0.999999	107.315	0.999999	54.663	0.999999
0.773467	0.999999	2.79841	0.999999	0.784817	0.999999	2.79841	0.999999	0.857719	0.999999	107.347	0.999999	54.6665	0.999999
0.773507	0.999999	2.79842	0.999999	0.784829	0.999999	2.79842	0.999999	0.85772	0.999999	107.365	0.999999	54.6668	0.999999
0.773688	0.999999	2.79872	0.999999	0.784843	0.999999	2.79872	0.999999	0.85774	0.999999	107.365	0.999999	54.6768	0.999999
0.77407	0.999999	2.79873	0.999999	0.784843	0.999999	2.79873	0.999999	0.857744	0.999999	107.368	0.999999	54.6788	0.999999
0.774129	0.999999	2.79878	0.999999	0.784848	0.999999	2.79878	0.999999	0.857756	0.999999	107.383	0.999999	54.6805	0.999999
0.7744	0.999999	2.79887	0.999999	0.784899	0.999999	2.79887	0.999999	0.857767	0.999999	107.396	0.999999	54.6869	0.999999
0.774778	0.999999	2.79895	0.999999	0.784911	0.999999	2.79895	0.999999	0.857779	0.999999	107.397	0.999999	54.6944	0.999999
0.775324	0.999999	2.79897	0.999999	0.784983	0.999999	2.79897	0.999999	0.857792	0.999999	107.41	0.999999	54.7077	0.999999
0.775405	0.999999	2.79901	0.999999	0.785001	0.999999	2.79901	0.999999	0.857828	0.999999	107.458	0.999999	54.7098	0.999999
0.775436	0.999999	2.79953	0.999999	0.785006	0.999999	2.79953	0.999999	0.857843	0.999999	107.473	0.999999	54.7181	0.999999
0.775664	0.999999	2.79976	0.999999	0.785008	0.999999	2.79976	0.999999	0.857908	0.999999	107.5	0.999999	54.7207	0.999999
0.775674	0.999999	2.79989	0.999999	0.785028	0.999999	2.79989	0.999999	0.857911	0.999999	107.507	0.999999	54.7276	0.999999
0.775692	0.999999	2.8	0.999999	0.785049	0.999999	2.8	0.999999	0.857921	0.999999	107.51	0.999999	54.7309	0.999999
0.775827	0.999999	2.80011	0.999999	0.785091	0.999999	2.80011	0.999999	0.857934	0.999999	107.517	0.999999	54.7336	0.999999
0.775837	0.999999	2.80015	0.999999	0.785112	0.999999	2.80015	0.999999	0.857942	0.999999	107.524	0.999999	54.7348	0.999999
0.775876	0.999999	2.80054	0.999999	0.785122	0.999999	2.80054	0.999999	0.857948	0.999999	107.555	0.999999	54.7349	0.999999
0.776019	0.999999	2.8009	0.999999	0.785133	0.999999	2.8009	0.999999	0.85795	0.999999	107.557	0.999999	54.7409	0.999999
0.776105	0.999999	2.80106	0.999999	0.785141	0.999999	2.80106	0.999999	0.857988	0.999999	107.567	0.999999	54.7421	0.999999
0.776266	0.999999	2.8011	0.999999	0.785207	0.999999	2.8011	0.999999	0.857992	0.999999	107.581	0.999999	54.7425	0.999999
0.776343	0.999999	2.80113	0.999999	0.785263	0.999999	2.80113	0.999999	0.858028	0.999999	107.581	0.999999	54.7473	0.999999
0.776383	0.999999	2.80115	0.999999	0.78531	0.999999	2.80115	0.999999	0.858056	0.999999	107.595	0.999999	54.7519	0.999999
0.776501	0.999999	2.80126	0.999999	0.785325	0.999999	2.80126	0.999999	0.858059	0.999999	107.602	0.999999	54.7529	0.999999
0.776533	0.999999	2.8013	0.999999	0.785346	0.999999	2.8013	0.999999	0.858105	0.999999	107.608	0.999999	54.756	0.999999
0.776673	0.999999	2.80149	0.999999	0.785352	0.999999	2.80149	0.999999	0.858119	0.999999	107.615	0.999999	54.7582	0.999999
0.777033	0.999999	2.80154	0.999999	0.785493	0.999999	2.80154	0.999999	0.858141	0.999999	107.62	0.999999	54.768	0.999999
0.77709	0.999999	2.80162	0.999999	0.785547	0.999999	2.80162	0.999999	0.858164	0.999999	107.621	0.999999	54.774	0.999999
0.777192	0.999999	2.80179	0.999999	0.785591	0.999999	2.80179	0.999999	0.858167	0.999999	107.629	0.999999	54.7764	0.999999
0.777218	0.999999	2.80183	0.999999	0.785597	0.999999	2.80183	0.999999	0.858188	0.999999	107.631	0.999999	54.7792	0.999999
0.77746	0.999999	2.80194	0.999999	0.785603	0.999999	2.80194	0.999999	0.858196	0.999999	107.633	0.999999	54.7841	0.999999
0.777501	0.999999	2.80209	0.999999	0.785625	0.999999	2.80209	0.999999	0.858222	0.999999	107.642	0.999999	54.7907	0.999999
0.777746	0.999999	2.8021	0.999999	0.785655	0.999999	2.8021	0.999999	0.858223	0.999999	107.647	0.999999	54.7912	0.999999
0.777854	0.999999	2.8022	0.999999	0.785668	0.999999	2.8022	0.999999	0.858356	0.999999	107.664	0.999999	54.7913	0.999999
0.777915	0.999999	2.80222	0.999999	0.785681	0.999999	2.80222	0.999999	0.858357	0.999999	107.666	0.999999	54.7954	0.999999
0.778247	0.999999	2.80237	0.999999	0.785693	0.999999	2.80237	0.999999	0.858362	0.999999	107.684	0.999999	54.7976	0.999999
0.778267	0.999999	2.80254	0.999999	0.785713	0.999999	2.80254	0.999999	0.858364	0.999999	107.685	0.999999	54.8051	0.999999
0.778331	0.999999	2.80256	0.999999	0.785742	0.999999	2.80256	0.999999	0.858372	0.999999	107.692	0.999999	54.8051	0.999999
0.778395	0.999999	2.80264	0.999999	0.78577	0.999999	2.80264	0.999999	0.858388	0.999999	107.695	0.999999	54.8061	0.999999
0.778566	0.999999	2.80323	0.999999	0.785772	0.999999	2.80323	0.999999	0.858401	0.999999	107.697	0.999999	54.812	0.999999
0.778846	0.999999	2.80338	0.999999	0.785797	0.999999	2.80338	0.999999	0.858409	0.999999	107.698	0.999999	54.814	0.999999
0.778958	0.999999	2.80356	0.999999	0.785874	0.999999	2.80356	0.999999	0.858415	0.999999	107.713	0.999999	54.816	0.999999
0.779004	0.999999	2.8036	0.999999	0.78594	0.999999	2.8036	0.999999	0.858434	0.999999	107.728	0.999999	54.8231	0.999999
0.77906	0.999999	2.80367	0.999999	0.78596	0.999999	2.80367	0.999999	0.858435	0.999999	107.749	0.999999	54.8274	0.999999
0.779379	0.999999	2.8037	0.999999	0.78598	0.999999	2.8037	0.999999	0.858446	0.999999	107.756	0.999999	54.8302	0.999999
0.779453	0.999999	2.8038	0.999999	0.786022	0.999999	2.8038	0.999999	0.858451	0.999999	107.757	0.999999	54.8317	0.999999
0.779474	0.999999	2.80384	0.999999	0.786032	0.999999	2.80384	0.999999	0.858462	0.999999	107.782	0.999999	54.8429	0.999999
0.779527	0.999999	2.80399	0.999999	0.786063	0.999999	2.80399	0.999999	0.858472	0.999999	107.784	0.999999	54.843	0.999999
0.77971	0.999999	2.80405	0.999999	0.786073	0.999999	2.80405	0.999999	0.858506	0.999999	107.808	0.999999	54.8436	0.999999
0.779853	0.999999	2.80425	0.999999	0.786106	0.999999	2.80425	0.999999	0.858564	0.999999	107.84	0.999999	54.8493	0.999999
0.779929	0.999999	2.80433	0.999999	0.786125	0.999999	2.80433	0.999999	0.858589	0.999999	107.841	0.999999	54.8508	0.999999
0.780158	0.999999	2.80441	0.999999	0.786133	0.999999	2.80441	0.999999	0.858592	0.999999	107.853	0.999999	54.856	0.999999
0.780263	0.999999	2.80447	0.999999	0.786172	0.999999	2.80447	0.999999	0.858595	0.999999	107.87	0.999999	54.8603	0.999999
0.780457	0.999999	2.80453	0.999999	0.78619	0.999999	2.80453	0.999999	0.858605	0.999999	107.907	0.999999	54.866	0.999999
0.780497	0.999999	2.80454	0.999999	0.78622	0.999999	2.80454	0.999999	0.85863	0.999999	107.919	0.999999	54.8662	0.999999
0.780655	0.999999	2.80515	0.999999	0.786224	0.999999	2.80515	0.999999	0.858669	0.999999	107.928	0.999999	54.8709	0.999999
0.780829	0.999999	2.80523	0.999999	0.786237	0.999999	2.80523	0.999999	0.85867	0.999999	107.931	0.999999	54.8777	0.999999
0.781119	0.999999	2.80527	0.999999	0.786247	0.999999	2.80527	0.999999	0.858692	0.999999	107.94	0.999999	54.878	0.999999
0.781165	0.999999	2.80531	0.999999	0.786344	0.999999	2.80531	0.999999	0.858699	0.999999	107.967	0.999999	54.8787	0.999999
0.781224	0.999999	2.80538	0.999999	0.786375	0.999999	2.80538	0.999999	0.8587	0.999999	107.967	0.999999	54.8802	0.999999
0.781354	0.999999	2.80571	0.999999	0.786417	0.999999	2.80571	0.999999	0.858721	0.999999	107.991	0.999999	54.8803	0.999999
0.781363	0.999999	2.80609	0.999999	0.786438	0.999999	2.80609	0.999999	0.858754	0.999999	107.994	0.999999	54.8856	0.999999
0.781411	0.999999	2.80609	0.999999	0.786444	0.999999	2.80609	0.999999	0.858758	0.999999	108.006	0.999999	54.8931	0.999999
0.781544	0.999999	2.8061	0.999999	0.786454	0.999999	2.8061	0.999999	0.858779	0.999999	108.017	0.999999	54.9021	0.999999
0.781718	0.999999	2.80623	0.999999	0.786458	0.999999	2.80623	0.999999	0.858781	0.999999	108.032	0.999999	54.9039	0.999999
0.781972	0.999999	2.80637	0.999999	0.786472	0.999999	2.80637	0.999999	0.858799	0.999999	108.037	0.999999	54.91	0.999999
0.782218	0.999999	2.80651	0.999999	0.786496	0.999999	2.80651	0.999999	0.858846	0.999999	108.042	0.999999	54.9111	0.999999
0.782238	0.999999	2.80657	0.999999	0.786498	0.999999	2.80657	0.999999	0.858856	0.999999	108.083	0.999999	54.9125	0.999999
0.782384	0.999999	2.80669	0.999999	0.786511	0.999999	2.80669	0.999999	0.858895	0.999999	108.087	0.999999	54.9132	0.999999
0.78257	0.999999	2.8067	0.999999	0.786511	0.999999	2.8067	0.999999	0.858901	0.999999	108.092	0.999999	54.9146	0.999999
0.782576	0.999999	2.80682	0.999999	0.786532	0.999999	2.80682	0.999999	0.858909	0.999999	108.105	0.999999	54.9155	0.999999
0.782658	0.999999	2.80689	0.999999	0.786612	0.999999	2.80689	0.999999	0.858922	0.999999	108.109	0.999999	54.9174	0.999999
0.782681	0.999999	2.8069	0.999999	0.78666	0.999999	2.8069	0.999999	0.858939	0.999999	108.111	0.999999	54.924	0.999999
0.782781	0.999999	2.80709	0.999999	0.786709	0.999999	2.80709	0.999999	0.858957	0.999999	108.133	0.999999	54.9256	0.999999
0.783194	0.999999	2.80732	0.999999	0.786755	0.999999	2.80732	0.999999	0.858957	0.999999	108.164	0.999999	54.926	0.999999
0.783386	0.999999	2.80735	0.999999	0.786765	0.999999	2.80735	0.999999	0.858994	0.999999	108.178	0.999999	54.9324	0.999999
0.783423	0.999999	2.8074	0.999999	0.78677	0.999999	2.8074	0.999999	0.859008	0.999999	108.206	0.999999	54.9332	0.999999
0.783683	0.999999	2.80757	0.999999	0.786811	0.999999	2.80757	0.999999	0.859013	0.999999	108.221	0.999999	54.9442	0.999999
0.783761	0.999999	2.80758	0.999999	0.786824	0.999999	2.80758	0.999999	0.859016	0.999999	108.226	0.999999	54.9454	0.999999
0.783808	0.999999	2.80792	0.999999	0.786879	0.999999	2.80792	0.999999	0.859059	0.999999	108.233	0.999999	54.9459	0.999999
0.78383	0.999999	2.80836	0.999999	0.786887	0.999999	2.80836	0.999999	0.859077	0.999999	108.245	0.999999	54.9502	0.999999
0.783884	0.999999	2.80842	0.999999	0.786965	0.999999	2.80842	0.999999	0.859081	0.999999	108.246	0.999999	54.958	0.999999
0.783973	0.999999	2.80852	0.999999	0.786971	0.999999	2.80852	0.999999	0.859122	0.999999	108.247	0.999999	54.9634	0.999999
0.784088	0.999999	2.80864	0.999999	0.786985	0.999999	2.80864	0.999999	0.859131	0.999999	108.266	0.999999	54.9676	0.999999
0.784182	0.999999	2.80872	0.999999	0.787001	0.999999	2.80872	0.999999	0.859133	0.999999	108.278	0.999999	54.9744	0.999999
0.784213	0.999999	2.80876	0.999999	0.787049	0.999999	2.80876	0.999999	0.859138	0.999999	108.291	0.999999	54.9759	0.999999
0.784651	0.999999	2.80903	0.999999	0.787054	0.999999	2.80903	0.999999	0.859138	0.999999	108.3	0.999999	54.9795	0.999999
0.784679	0.999999	2.80922	0.999999	0.78707	0.999999	2.80922	0.999999	0.859154	0.999999	108.311	0.999999	54.9799	0.999999
0.784726	0.999999	2.8093	0.999999	0.787128	0.999999	2.8093	0.999999	0.859169	0.999999	108.315	0.999999	54.9801	0.999999
0.784755	0.999999	2.80931	0.999999	0.787174	0.999999	2.80931	0.999999	0.85917	0.999999	108.328	0.999999	54.9813	0.999999
0.784824	0.999999	2.80932	0.999999	0.787192	0.999999	2.80932	0.999999	0.859212	0.999999	108.34	0.999999	54.9823	0.999999
0.784989	0.999999	2.80954	0.999999	0.787204	0.999999	2.80954	0.999999	0.859217	0.999999	108.363	0.999999	54.9834	0.999999
0.785114	0.999999	2.80962	0.999999	0.787235	0.999999	2.80962	0.999999	0.859217	0.999999	108.419	0.999999	54.9947	0.999999
0.785191	0.999999	2.81008	0.999999	0.787283	0.999999	2.81008	0.999999	0.859238	0.999999	108.437	0.999999	54.9997	0.999999
0.785333	0.999999	2.81025	0.999999	0.787309	0.999999	2.81025	0.999999	0.859241	0.999999	108.442	0.999999	54.9999	0.999999
0.785408	0.999999	2.81033	0.999999	0.787339	0.999999	2.81033	0.999999	0.859253	0.999999	108.463	0.999999	55.0005	0.999999
0.785471	0.999999	2.81059	0.999999	0.787357	0.999999	2.81059	0.999999	0.859263	0.999999	108.472	0.999999	55.0018	0.999999
0.785553	0.999999	2.81066	0.999999	0.787366	0.999999	2.81066	0.999999	0.859276	0.999999	108.476	0.999999	55.0138	0.999999
0.786221	0.999999	2.81074	0.999999	0.78737	0.999999	2.81074	0.999999	0.859282	0.999999	108.497	0.999999	55.0147	0.999999
0.78675	0.999999	2.81083	0.999999	0.787381	0.999999	2.81083	0.999999	0.859339	0.999999	108.509	0.999999	55.0179	0.999999
0.786763	0.999999	2.81103	0.999999	0.787437	0.999999	2.81103	0.999999	0.859346	0.999999	108.531	0.999999	55.0198	0.999999
0.786777	0.999999	2.81121	0.999999	0.787466	0.999999	2.81121	0.999999	0.859354	0.999999	108.532	0.999999	55.0245	0.999999
0.786905	0.999999	2.81123	0.999999	0.787486	0.999999	2.81123	0.999999	0.859363	0.999999	108.557	0.999999	55.026	0.999999
0.786908	0.999999	2.8116	0.999999	0.787488	0.999999	2.8116	0.999999	0.859364	0.999999	108.603	0.999999	55.0327	0.999999
0.787005	0.999999	2.81164	0.999999	0.787506	0.999999	2.81164	0.999999	0.859384	0.999999	108.609	0.999999	55.0348	0.999999
0.787116	0.999999	2.81167	0.999999	0.78751	0.999999	2.81167	0.999999	0.859441	0.999999	108.647	0.999999	55.0351	0.999999
0.78712	0.999999	2.81181	0.999999	0.787521	0.999999	2.81181	0.999999	0.859449	0.999999	108.653	0.999999	55.0433	0.999999
0.787124	0.999999	2.81196	0.999999	0.78753	0.999999	2.81196	0.999999	0.859459	0.999999	108.666	0.999999	55.0477	0.999999
0.787126	0.999999	2.81198	0.999999	0.787546	0.999999	2.81198	0.999999	0.85946	0.999999	108.668	0.999999	55.0494	0.999999
0.787435	0.999999	2.8121	0.999999	0.787552	0.999999	2.8121	0.999999	0.859484	0.999999	108.674	0.999999	55.0495	0.999999
0.787444	0.999999	2.81211	0.999999	0.78768	0.999999	2.81211	0.999999	0.859493	0.999999	108.683	0.999999	55.0524	0.999999
0.787463	0.999999	2.81224	0.999999	0.787686	0.999999	2.81224	0.999999	0.859524	0.999999	108.685	0.999999	55.0532	0.999999
0.787466	0.999999	2.8124	0.999999	0.787703	0.999999	2.8124	0.999999	0.859536	0.999999	108.698	0.999999	55.0532	0.999999
0.787713	0.999999	2.81273	0.999999	0.787711	0.999999	2.81273	0.999999	0.859581	0.999999	108.72	0.999999	55.0554	0.999999
0.787785	0.999999	2.81277	0.999999	0.787734	0.999999	2.81277	0.999999	0.85962	0.999999	108.754	0.999999	55.0593	0.999999
0.787831	0.999999	2.81296	0.999999	0.787741	0.999999	2.81296	0.999999	0.859682	0.999999	108.756	0.999999	55.0649	0.999999
0.787865	0.999999	2.81318	0.999999	0.787742	0.999999	2.81318	0.999999	0.859692	0.999999	108.773	0.999999	55.0697	0.999999
0.787869	0.999999	2.81339	0.999999	0.787794	0.999999	2.81339	0.999999	0.859699	0.999999	108.783	0.999999	55.0743	0.999999
0.788	0.999999	2.81346	0.999999	0.787806	0.999999	2.81346	0.999999	0.8597	0.999999	108.786	0.999999	55.0767	0.999999
0.788046	0.999999	2.81353	0.999999	0.78784	0.999999	2.81353	0.999999	0.859703	0.999999	108.788	0.999999	55.0775	0.999999
0.788061	0.999999	2.8136	0.999999	0.787847	0.999999	2.8136	0.999999	0.859712	0.999999	108.811	0.999999	55.0816	0.999999
0.788073	0.999999	2.81391	0.999999	0.787857	0.999999	2.81391	0.999999	0.859717	0.999999	108.816	0.999999	55.084	0.999999
0.788657	0.999999	2.81411	0.999999	0.787887	0.999999	2.81411	0.999999	0.859739	0.999999	108.816	0.999999	55.0843	0.999999
0.788709	0.999999	2.81414	0.999999	0.788006	0.999999	2.81414	0.999999	0.859741	0.999999	108.818	0.999999	55.0875	0.999999
0.788972	0.999999	2.8142	0.999999	0.78804	0.999999	2.8142	0.999999	0.859745	0.999999	108.827	0.999999	55.0887	0.999999
0.789178	0.999999	2.81423	0.999999	0.788063	0.999999	2.81423	0.999999	0.859747	0.999999	108.843	0.999999	55.0899	0.999999
0.789422	0.999999	2.81429	0.999999	0.788067	0.999999	2.81429	0.999999	0.859764	0.999999	108.863	0.999999	55.0941	0.999999
0.789498	0.999999	2.81443	0.999999	0.788067	0.999999	2.81443	0.999999	0.859764	0.999999	108.885	0.999999	55.0974	0.999999
0.78953	0.999999	2.81443	0.999999	0.788113	0.999999	2.81443	0.999999	0.859764	0.999999	108.894	0.999999	55.0976	0.999999
0.78961	0.999999	2.81456	0.999999	0.788114	0.999999	2.81456	0.999999	0.859772	0.999999	108.902	0.999999	55.0986	0.999999
0.789688	0.999999	2.81464	0.999999	0.788143	0.999999	2.81464	0.999999	0.859801	0.999999	108.908	0.999999	55.1011	0.999999
0.789783	0.999999	2.81471	0.999999	0.788173	0.999999	2.81471	0.999999	0.859828	0.999999	108.916	0.999999	55.1012	0.999999
0.790182	0.999999	2.81488	0.999999	0.788215	0.999999	2.81488	0.999999	0.859845	0.999999	108.924	0.999999	55.1013	0.999999
0.79019	0.999999	2.81494	0.999999	0.788226	0.999999	2.81494	0.999999	0.859862	0.999999	108.927	0.999999	55.1018	0.999999
0.790327	0.999999	2.815	0.999999	0.788284	0.999999	2.815	0.999999	0.859873	0.999999	108.944	0.999999	55.1031	0.999999
0.790511	0.999999	2.81509	0.999999	0.788306	0.999999	2.81509	0.999999	0.859884	0.999999	108.963	0.999999	55.1062	0.999999
0.790553	0.999999	2.81516	0.999999	0.788309	0.999999	2.81516	0.999999	0.859924	0.999999	108.974	0.999999	55.1085	0.999999
0.790798	0.999999	2.81532	0.999999	0.78833	0.999999	2.81532	0.999999	0.859996	0.999999	109.014	0.999999	55.1128	0.999999
0.791115	0.999999	2.81538	0.999999	0.788338	0.999999	2.81538	0.999999	0.860034	0.999999	109.025	0.999999	55.1154	0.999999
0.791151	0.999999	2.81546	0.999999	0.788364	0.999999	2.81546	0.999999	0.860053	0.999999	109.037	0.999999	55.1156	0.999999
0.791166	0.999999	2.81584	0.999999	0.788461	0.999999	2.81584	0.999999	0.86006	0.999999	109.053	0.999999	55.1235	0.999999
0.791454	0.999999	2.81594	0.999999	0.78856	0.999999	2.81594	0.999999	0.860068	0.999999	109.056	0.999999	55.124	0.999999
0.791599	0.999999	2.81639	0.999999	0.788584	0.999999	2.81639	0.999999	0.860088	0.999999	109.059	0.999999	55.1249	0.999999
0.791618	0.999999	2.81649	0.999999	0.788603	0.999999	2.81649	0.999999	0.860097	0.999999	109.086	0.999999	55.1255	0.999999
0.791759	0.999999	2.81653	0.999999	0.788623	0.999999	2.81653	0.999999	0.860103	0.999999	109.098	0.999999	55.1275	0.999999
0.792037	0.999999	2.81666	0.999999	0.788657	0.999999	2.81666	0.999999	0.86011	0.999999	109.121	0.999999	55.1318	0.999999
0.792038	0.999999	2.81682	0.999999	0.788699	0.999999	2.81682	0.999999	0.860113	0.999999	109.123	0.999999	55.144	0.999999
0.792072	0.999999	2.81709	0.999999	0.788708	0.999999	2.81709	0.999999	0.860114	0.999999	109.137	0.999999	55.1456	0.999999
0.792106	0.999999	2.81722	0.999999	0.788718	0.999999	2.81722	0.999999	0.860126	0.999999	109.141	0.999999	55.1471	0.999999
0.79216	0.999999	2.81731	0.999999	0.788721	0.999999	2.81731	0.999999	0.860143	0.999999	109.145	0.999999	55.1473	0.999999
0.792238	0.999999	2.81762	0.999999	0.788786	0.999999	2.81762	0.999999	0.860145	0.999999	109.145	0.999999	55.1482	0.999999
0.792323	0.999999	2.81786	0.999999	0.788827	0.999999	2.81786	0.999999	0.860156	0.999999	109.146	0.999999	55.1491	0.999999
0.792605	0.999999	2.81793	0.999999	0.788868	0.999999	2.81793	0.999999	0.860166	0.999999	109.147	0.999999	55.1497	0.999999
0.792756	0.999999	2.81799	0.999999	0.788894	0.999999	2.81799	0.999999	0.860166	0.999999	109.192	0.999999	55.1499	0.999999
0.793034	0.999999	2.81823	0.999999	0.788899	0.999999	2.81823	0.999999	0.860215	0.999999	109.197	0.999999	55.1508	0.999999
0.79307	0.999999	2.81833	0.999999	0.78891	0.999999	2.81833	0.999999	0.860221	0.999999	109.197	0.999999	55.1619	0.999999
0.79338	0.999999	2.8186	0.999999	0.78895	0.999999	2.8186	0.999999	0.860257	0.999999	109.228	0.999999	55.1639	0.999999
0.793389	0.999999	2.81862	0.999999	0.788955	0.999999	2.81862	0.999999	0.860262	0.999999	109.23	0.999999	55.1678	0.999999
0.793391	0.999999	2.81865	0.999999	0.788971	0.999999	2.81865	0.999999	0.860302	0.999999	109.26	0.999999	55.1687	0.999999
0.793416	0.999999	2.81882	0.999999	0.789019	0.999999	2.81882	0.999999	0.860352	0.999999	109.268	0.999999	55.1816	0.999999
0.793441	0.999999	2.81889	0.999999	0.78902	0.999999	2.81889	0.999999	0.860357	0.999999	109.272	0.999999	55.1865	0.999999
0.793465	0.999999	2.8189	0.999999	0.789064	0.999999	2.8189	0.999999	0.860363	0.999999	109.273	0.999999	55.1875	0.999999
0.793595	0.999999	2.81898	0.999999	0.789065	0.999999	2.81898	0.999999	0.860372	0.999999	109.277	0.999999	55.1903	0.999999
0.793669	0.999999	2.81907	0.999999	0.789085	0.999999	2.81907	0.999999	0.860392	0.999999	109.28	0.999999	55.1921	0.999999
0.793927	0.999999	2.81909	0.999999	0.789089	0.999999	2.81909	0.999999	0.860399	0.999999	109.282	0.999999	55.1965	0.999999
0.794124	0.999999	2.81912	0.999999	0.789092	0.999999	2.81912	0.999999	0.860399	0.999999	109.296	0.999999	55.1965	0.999999
0.794323	0.999999	2.8192	0.999999	0.789152	0.999999	2.8192	0.999999	0.860454	0.999999	109.35	0.999999	55.197	0.999999
0.794371	0.999999	2.81922	0.999999	0.789173	0.999999	2.81922	0.999999	0.86047	0.999999	109.367	0.999999	55.1985	0.999999
0.794471	0.999999	2.81942	0.999999	0.789184	0.999999	2.81942	0.999999	0.860481	0.999999	109.37	0.999999	55.1996	0.999999
0.794504	0.999999	2.81942	0.999999	0.78919	0.999999	2.81942	0.999999	0.860506	0.999999	109.377	0.999999	55.2019	0.999999
0.794566	0.999999	2.81977	0.999999	0.789205	0.999999	2.81977	0.999999	0.860533	0.999999	109.389	0.999999	55.2063	0.999999
0.79469	0.999999	2.81977	0.999999	0.789207	0.999999	2.81977	0.999999	0.860547	0.999999	109.437	0.999999	55.2069	0.999999
0.794803	0.999999	2.81978	0.999999	0.78923	0.999999	2.81978	0.999999	0.860547	0.999999	109.44	0.999999	55.2077	0.999999
0.794982	0.999999	2.82005	0.999999	0.789239	0.999999	2.82005	0.999999	0.860554	0.999999	109.442	0.999999	55.2106	0.999999
0.795104	0.999999	2.82022	0.999999	0.789246	0.999999	2.82022	0.999999	0.860559	0.999999	109.445	0.999999	55.2147	0.999999
0.79517	0.999999	2.82029	0.999999	0.789259	0.999999	2.82029	0.999999	0.860562	0.999999	109.455	0.999999	55.2205	0.999999
0.795275	0.999999	2.82061	0.999999	0.789344	0.999999	2.82061	0.999999	0.860563	0.999999	109.458	0.999999	55.2233	0.999999
0.795281	0.999999	2.82088	0.999999	0.789345	0.999999	2.82088	0.999999	0.86058	0.999999	109.468	0.999999	55.2261	0.999999
0.795368	0.999999	2.82094	0.999999	0.78939	0.999999	2.82094	0.999999	0.860591	0.999999	109.481	0.999999	55.2287	0.999999
0.795428	0.999999	2.82111	0.999999	0.789448	0.999999	2.82111	0.999999	0.860624	0.999999	109.504	0.999999	55.2301	0.999999
0.795547	0.999999	2.82117	0.999999	0.789451	0.999999	2.82117	0.999999	0.860635	0.999999	109.509	0.999999	55.2315	0.999999
0.795806	0.999999	2.8213	0.999999	0.789473	0.999999	2.8213	0.999999	0.860646	0.999999	109.517	0.999999	55.2347	0.999999
0.796256	0.999999	2.82135	0.999999	0.789482	0.999999	2.82135	0.999999	0.860647	0.999999	109.518	0.999999	55.2359	0.999999
0.79633	0.999999	2.8215	0.999999	0.789503	0.999999	2.8215	0.999999	0.860662	0.999999	109.521	0.999999	55.238	0.999999
0.796368	0.999999	2.82161	0.999999	0.789527	0.999999	2.82161	0.999999	0.860674	0.999999	109.523	0.999999	55.2434	0.999999
0.796445	0.999999	2.82176	0.999999	0.789554	0.999999	2.82176	0.999999	0.860712	0.999999	109.543	0.999999	55.2437	0.999999
0.796508	0.999999	2.8218	0.999999	0.789583	0.999999	2.8218	0.999999	0.860744	0.999999	109.562	0.999999	55.248	0.999999
0.796655	0.999999	2.82183	0.999999	0.789662	0.999999	2.82183	0.999999	0.860788	0.999999	109.567	0.999999	55.2481	0.999999
0.796723	0.999999	2.82233	0.999999	0.789664	0.999999	2.82233	0.999999	0.860796	0.999999	109.584	0.999999	55.2566	0.999999
0.796883	0.999999	2.82235	0.999999	0.789668	0.999999	2.82235	0.999999	0.860802	0.999999	109.591	0.999999	55.2572	0.999999
0.797172	0.999999	2.82249	0.999999	0.789673	0.999999	2.82249	0.999999	0.860804	0.999999	109.602	0.999999	55.2585	0.999999
0.797219	0.999999	2.82287	0.999999	0.789713	0.999999	2.82287	0.999999	0.860808	0.999999	109.634	0.999999	55.2635	0.999999
0.797235	0.999999	2.82291	0.999999	0.789754	0.999999	2.82291	0.999999	0.860809	0.999999	109.643	0.999999	55.2688	0.999999
0.797411	0.999999	2.823	0.999999	0.789755	0.999999	2.823	0.999999	0.860816	0.999999	109.66	0.999999	55.2714	0.999999
0.797554	0.999999	2.82306	0.999999	0.789775	0.999999	2.82306	0.999999	0.860836	0.999999	109.668	0.999999	55.2731	0.999999
0.79762	0.999999	2.82331	0.999999	0.789797	0.999999	2.82331	0.999999	0.860846	0.999999	109.67	0.999999	55.2732	0.999999
0.797991	0.999999	2.82341	0.999999	0.789819	0.999999	2.82341	0.999999	0.860864	0.999999	109.693	0.999999	55.2737	0.999999
0.798101	0.999999	2.82343	0.999999	0.789855	0.999999	2.82343	0.999999	0.860867	0.999999	109.733	0.999999	55.2751	0.999999
0.798102	0.999999	2.82352	0.999999	0.789862	0.999999	2.82352	0.999999	0.860883	0.999999	109.759	0.999999	55.2786	0.999999
0.798158	0.999999	2.82373	0.999999	0.789936	0.999999	2.82373	0.999999	0.860898	0.999999	109.762	0.999999	55.2799	0.999999
0.798524	0.999999	2.82379	0.999999	0.789957	0.999999	2.82379	0.999999	0.860904	0.999999	109.777	0.999999	55.2866	0.999999
0.798627	0.999999	2.8238	0.999999	0.789958	0.999999	2.8238	0.999999	0.860906	0.999999	109.783	0.999999	55.2884	0.999999
0.798692	0.999999	2.82383	0.999999	0.789964	0.999999	2.82383	0.999999	0.860911	0.999999	109.786	0.999999	55.2889	0.999999
0.798711	0.999999	2.82386	0.999999	0.789976	0.999999	2.82386	0.999999	0.860934	0.999999	109.792	0.999999	55.2901	0.999999
0.798748	0.999999	2.82388	0.999999	0.789985	0.999999	2.82388	0.999999	0.860937	0.999999	109.794	0.999999	55.2968	0.999999
0.799044	0.999999	2.82459	0.999999	0.790014	0.999999	2.82459	0.999999	0.860974	0.999999	109.801	0.999999	55.2978	0.999999
0.799221	0.999999	2.82472	0.999999	0.790023	0.999999	2.82472	0.999999	0.861005	0.999999	109.862	0.999999	55.2982	0.999999
0.799235	0.999999	2.82478	0.999999	0.790025	0.999999	2.82478	0.999999	0.861024	0.999999	109.862	0.999999	55.306	0.999999
0.799383	0.999999	2.82479	0.999999	0.790031	0.999999	2.82479	0.999999	0.861025	0.999999	109.871	0.999999	55.3075	0.999999
0.79942	0.999999	2.82501	0.999999	0.790089	0.999999	2.82501	0.999999	0.861079	0.999999	109.877	0.999999	55.3089	0.999999
0.79952	0.999999	2.82508	0.999999	0.790123	0.999999	2.82508	0.999999	0.861089	0.999999	109.878	0.999999	55.3134	0.999999
0.79956	0.999999	2.82509	0.999999	0.79018	0.999999	2.82509	0.999999	0.861154	0.999999	109.886	0.999999	55.3137	0.999999
0.799665	0.999999	2.82571	0.999999	0.790204	0.999999	2.82571	0.999999	0.861161	0.999999	109.9	0.999999	55.3138	0.999999
0.799702	0.999999	2.82574	0.999999	0.790225	0.999999	2.82574	0.999999	0.861192	0.999999	109.901	0.999999	55.3218	0.999999
0.799708	0.999999	2.82587	0.999999	0.790317	0.999999	2.82587	0.999999	0.861207	0.999999	109.908	0.999999	55.3263	0.999999
0.7998	0.999999	2.82587	0.999999	0.790332	0.999999	2.82587	0.999999	0.861211	0.999999	109.909	0.999999	55.3268	0.999999
0.800067	0.999999	2.82602	0.999999	0.79035	0.999999	2.82602	0.999999	0.86123	0.999999	109.964	0.999999	55.338	0.999999
0.800166	0.999999	2.82603	0.999999	0.790355	0.999999	2.82603	0.999999	0.861242	0.999999	110.033	0.999999	55.3394	0.999999
0.800203	0.999999	2.82621	0.999999	0.790356	0.999999	2.82621	0.999999	0.861253	0.999999	110.085	0.999999	55.3411	0.999999
0.800494	0.999999	2.82638	0.999999	0.79036	0.999999	2.82638	0.999999	0.861297	0.999999	110.116	0.999999	55.3422	0.999999
0.800559	0.999999	2.82652	0.999999	0.790371	0.999999	2.82652	0.999999	0.861298	0.999999	110.117	0.999999	55.3428	0.999999
0.800937	0.999999	2.82679	0.999999	0.790432	0.999999	2.82679	0.999999	0.861313	0.999999	110.123	0.999999	55.3433	0.999999
0.800937	0.999999	2.82684	0.999999	0.790436	0.999999	2.82684	0.999999	0.861342	0.999999	110.133	0.999999	55.3485	0.999999
0.801075	0.999999	2.82708	0.999999	0.790465	0.999999	2.82708	0.999999	0.861373	0.999999	110.141	0.999999	55.3502	0.999999
0.801229	0.999999	2.82721	0.999999	0.790467	0.999999	2.82721	0.999999	0.861374	0.999999	110.165	0.999999	55.3506	0.999999
0.801248	0.999999	2.82723	0.999999	0.790497	0.999999	2.82723	0.999999	0.861381	0.999999	110.168	0.999999	55.3527	0.999999
0.801442	0.999999	2.82744	0.999999	0.790505	0.999999	2.82744	0.999999	0.861394	0.999999	110.17	0.999999	55.3574	0.999999
0.801568	0.999999	2.82745	0.999999	0.790548	0.999999	2.82745	0.999999	0.861428	0.999999	110.174	0.999999	55.36	0.999999
0.801625	0.999999	2.82763	0.999999	0.790571	0.999999	2.82763	0.999999	0.861438	0.999999	110.186	0.999999	55.3646	0.999999
0.801875	0.999999	2.82769	0.999999	0.790646	0.999999	2.82769	0.999999	0.861438	0.999999	110.203	0.999999	55.3685	0.999999
0.802025	0.999999	2.82773	0.999999	0.790655	0.999999	2.82773	0.999999	0.86146	0.999999	110.21	0.999999	55.3703	0.999999
0.802055	0.999999	2.82791	0.999999	0.790709	0.999999	2.82791	0.999999	0.861476	0.999999	110.216	0.999999	55.3714	0.999999
0.802072	0.999999	2.82804	0.999999	0.79071	0.999999	2.82804	0.999999	0.861489	0.999999	110.221	0.999999	55.3715	0.999999
0.802172	0.999999	2.82815	0.999999	0.790712	0.999999	2.82815	0.999999	0.861492	0.999999	110.262	0.999999	55.3742	0.999999
0.80225	0.999999	2.8283	0.999999	0.79072	0.999999	2.8283	0.999999	0.861496	0.999999	110.275	0.999999	55.3768	0.999999
0.80238	0.999999	2.82851	0.999999	0.790722	0.999999	2.82851	0.999999	0.861509	0.999999	110.289	0.999999	55.3863	0.999999
0.802384	0.999999	2.82855	0.999999	0.790748	0.999999	2.82855	0.999999	0.861517	0.999999	110.308	0.999999	55.3865	0.999999
0.802869	0.999999	2.82871	0.999999	0.790763	0.999999	2.82871	0.999999	0.861519	0.999999	110.313	0.999999	55.3884	0.999999
0.802935	0.999999	2.82875	0.999999	0.790788	0.999999	2.82875	0.999999	0.861521	0.999999	110.337	0.999999	55.3988	0.999999
0.802943	0.999999	2.82884	0.999999	0.790794	0.999999	2.82884	0.999999	0.861522	0.999999	110.353	0.999999	55.4	0.999999
0.802975	0.999999	2.82892	0.999999	0.790801	0.999999	2.82892	0.999999	0.861526	0.999999	110.354	0.999999	55.4067	0.999999
0.803097	0.999999	2.82903	0.999999	0.790819	0.999999	2.82903	0.999999	0.861556	0.999999	110.356	0.999999	55.4073	0.999999
0.803161	0.999999	2.82905	0.999999	0.790858	0.999999	2.82905	0.999999	0.861581	0.999999	110.364	0.999999	55.408	0.999999
0.803246	0.999999	2.82932	0.999999	0.790904	0.999999	2.82932	0.999999	0.861594	0.999999	110.4	0.999999	55.408	0.999999
0.803345	0.999999	2.82946	0.999999	0.790907	0.999999	2.82946	0.999999	0.861617	0.999999	110.42	0.999999	55.4082	0.999999
0.803403	0.999999	2.8299	0.999999	0.791035	0.999999	2.8299	0.999999	0.861627	0.999999	110.427	0.999999	55.4094	0.999999
0.803556	0.999999	2.83	0.999999	0.791068	0.999999	2.83	0.999999	0.861689	0.999999	110.433	0.999999	55.4158	0.999999
0.803584	0.999999	2.83007	0.999999	0.791089	0.999999	2.83007	0.999999	0.86171	0.999999	110.436	0.999999	55.4173	0.999999
0.803589	0.999999	2.83044	0.999999	0.791092	0.999999	2.83044	0.999999	0.861712	0.999999	110.438	0.999999	55.4212	0.999999
0.803855	0.999999	2.83044	0.999999	0.791194	0.999999	2.83044	0.999999	0.861731	0.999999	110.451	0.999999	55.4216	0.999999
0.803865	0.999999	2.83047	0.999999	0.791215	0.999999	2.83047	0.999999	0.861735	0.999999	110.459	0.999999	55.4217	0.999999
0.803947	0.999999	2.83059	0.999999	0.791218	0.999999	2.83059	0.999999	0.861742	0.999999	110.461	0.999999	55.4224	0.999999
0.804007	0.999999	2.83076	0.999999	0.791219	0.999999	2.83076	0.999999	0.861746	0.999999	110.465	0.999999	55.4229	0.999999
0.804206	0.999999	2.83095	0.999999	0.791227	0.999999	2.83095	0.999999	0.861767	0.999999	110.467	0.999999	55.4236	0.999999
0.804388	0.999999	2.83097	0.999999	0.791231	0.999999	2.83097	0.999999	0.86177	0.999999	110.495	0.999999	55.4244	0.999999
0.804486	0.999999	2.83107	0.999999	0.791278	0.999999	2.83107	0.999999	0.86178	0.999999	110.502	0.999999	55.4258	0.999999
0.804555	0.999999	2.83125	0.999999	0.791283	0.999999	2.83125	0.999999	0.861789	0.999999	110.542	0.999999	55.4321	0.999999
0.804578	0.999999	2.8314	0.999999	0.791323	0.999999	2.8314	0.999999	0.861817	0.999999	110.567	0.999999	55.4364	0.999999
0.804734	0.999999	2.8318	0.999999	0.791413	0.999999	2.8318	0.999999	0.861821	0.999999	110.569	0.999999	55.4376	0.999999
0.804765	0.999999	2.83182	0.999999	0.791449	0.999999	2.83182	0.999999	0.86184	0.999999	110.57	0.999999	55.4467	0.999999
0.805062	0.999999	2.83184	0.999999	0.791455	0.999999	2.83184	0.999999	0.861857	0.999999	110.594	0.999999	55.4501	0.999999
0.805094	0.999999	2.83186	0.999999	0.79147	0.999999	2.83186	0.999999	0.861865	0.999999	110.595	0.999999	55.4507	0.999999
0.805112	0.999999	2.83187	0.999999	0.791484	0.999999	2.83187	0.999999	0.86187	0.999999	110.608	0.999999	55.4544	0.999999
0.805491	0.999999	2.83209	0.999999	0.791595	0.999999	2.83209	0.999999	0.861881	0.999999	110.62	0.999999	55.4574	0.999999
0.805769	0.999999	2.83226	0.999999	0.791612	0.999999	2.83226	0.999999	0.861885	0.999999	110.623	0.999999	55.459	0.999999
0.805891	0.999999	2.83227	0.999999	0.791628	0.999999	2.83227	0.999999	0.861893	0.999999	110.624	0.999999	55.4619	0.999999
0.806058	0.999999	2.8324	0.999999	0.791638	0.999999	2.8324	0.999999	0.861895	0.999999	110.673	0.999999	55.4634	0.999999
0.80608	0.999999	2.83249	0.999999	0.791644	0.999999	2.83249	0.999999	0.861896	0.999999	110.691	0.999999	55.4727	0.999999
0.80613	0.999999	2.83258	0.999999	0.791662	0.999999	2.83258	0.999999	0.861901	0.999999	110.724	0.999999	55.476	0.999999
0.806167	0.999999	2.8326	0.999999	0.791711	0.999999	2.8326	0.999999	0.861901	0.999999	110.743	0.999999	55.4771	0.999999
0.80628	0.999999	2.83276	0.999999	0.791749	0.999999	2.83276	0.999999	0.86191	0.999999	110.759	0.999999	55.4778	0.999999
0.806355	0.999999	2.83282	0.999999	0.791788	0.999999	2.83282	0.999999	0.861917	0.999999	110.774	0.999999	55.4833	0.999999
0.806371	0.999999	2.83286	0.999999	0.79179	0.999999	2.83286	0.999999	0.86196	0.999999	110.789	0.999999	55.4846	0.999999
0.806735	0.999999	2.8329	0.999999	0.7918	0.999999	2.8329	0.999999	0.86197	0.999999	110.79	0.999999	55.4879	0.999999
0.806775	0.999999	2.83304	0.999999	0.791814	0.999999	2.83304	0.999999	0.861989	0.999999	110.798	0.999999	55.4899	0.999999
0.8068	0.999999	2.83305	0.999999	0.791815	0.999999	2.83305	0.999999	0.861998	0.999999	110.8	0.999999	55.4909	0.999999
0.80713	0.999999	2.8332	0.999999	0.791824	0.999999	2.8332	0.999999	0.862016	0.999999	110.812	0.999999	55.4938	0.999999
0.807173	0.999999	2.83325	0.999999	0.791843	0.999999	2.83325	0.999999	0.86202	0.999999	110.816	0.999999	55.4954	0.999999
0.807431	0.999999	2.8334	0.999999	0.791851	0.999999	2.8334	0.999999	0.862023	0.999999	110.825	0.999999	55.4972	0.999999
0.807484	0.999999	2.83345	0.999999	0.791857	0.999999	2.83345	0.999999	0.862028	0.999999	110.827	0.999999	55.4993	0.999999
0.807773	0.999999	2.83365	0.999999	0.79189	0.999999	2.83365	0.999999	0.862067	0.999999	110.852	0.999999	55.5029	0.999999
0.807906	0.999999	2.834	0.999999	0.791916	0.999999	2.834	0.999999	0.862071	0.999999	110.871	0.999999	55.5144	0.999999
0.808014	0.999999	2.83402	0.999999	0.791918	0.999999	2.83402	0.999999	0.862073	0.999999	110.88	0.999999	55.5153	0.999999
0.808038	0.999999	2.83424	0.999999	0.791936	0.999999	2.83424	0.999999	0.862095	0.999999	110.902	0.999999	55.5214	0.999999
0.808264	0.999999	2.83431	0.999999	0.791937	0.999999	2.83431	0.999999	0.862117	0.999999	110.904	0.999999	55.5261	0.999999
0.808265	0.999999	2.83436	0.999999	0.791955	0.999999	2.83436	0.999999	0.86213	0.999999	110.932	0.999999	55.5316	0.999999
0.808449	0.999999	2.83449	0.999999	0.791959	0.999999	2.83449	0.999999	0.862134	0.999999	110.932	0.999999	55.5322	0.999999
0.808587	0.999999	2.83452	0.999999	0.791977	0.999999	2.83452	0.999999	0.862139	0.999999	110.937	0.999999	55.5324	0.999999
0.808605	0.999999	2.83453	0.999999	0.791992	0.999999	2.83453	0.999999	0.862169	0.999999	110.938	0.999999	55.535	0.999999
0.808773	0.999999	2.8347	0.999999	0.792012	0.999999	2.8347	0.999999	0.862183	0.999999	110.945	0.999999	55.5405	0.999999
0.808861	0.999999	2.83475	0.999999	0.792036	0.999999	2.83475	0.999999	0.862184	0.999999	110.992	0.999999	55.542	0.999999
0.809004	0.999999	2.8349	0.999999	0.79204	0.999999	2.8349	0.999999	0.862191	0.999999	111.04	0.999999	55.5447	0.999999
0.809033	0.999999	2.83499	0.999999	0.792085	0.999999	2.83499	0.999999	0.862198	0.999999	111.047	0.999999	55.5476	0.999999
0.809046	0.999999	2.835	0.999999	0.792144	0.999999	2.835	0.999999	0.8622	0.999999	111.052	0.999999	55.5545	0.999999
0.80921	0.999999	2.83523	0.999999	0.792156	0.999999	2.83523	0.999999	0.862205	0.999999	111.059	0.999999	55.5563	0.999999
0.809374	0.999999	2.83533	0.999999	0.79216	0.999999	2.83533	0.999999	0.862244	0.999999	111.066	0.999999	55.5595	0.999999
0.809472	0.999999	2.83568	0.999999	0.792187	0.999999	2.83568	0.999999	0.862259	0.999999	111.088	0.999999	55.5604	0.999999
0.809584	0.999999	2.83571	0.999999	0.792239	0.999999	2.83571	0.999999	0.862263	0.999999	111.121	0.999999	55.5626	0.999999
0.809708	0.999999	2.83592	0.999999	0.792264	0.999999	2.83592	0.999999	0.862282	0.999999	111.127	0.999999	55.5636	0.999999
0.809866	0.999999	2.83593	0.999999	0.792292	0.999999	2.83593	0.999999	0.862326	0.999999	111.132	0.999999	55.5643	0.999999
0.809923	0.999999	2.83606	0.999999	0.792297	0.999999	2.83606	0.999999	0.86233	0.999999	111.134	0.999999	55.5644	0.999999
0.809979	0.999999	2.83617	0.999999	0.792324	0.999999	2.83617	0.999999	0.862344	0.999999	111.136	0.999999	55.5672	0.999999
0.810041	0.999999	2.83628	0.999999	0.792345	0.999999	2.83628	0.999999	0.862348	0.999999	111.142	0.999999	55.5713	0.999999
0.810169	0.999999	2.83682	0.999999	0.792352	0.999999	2.83682	0.999999	0.862351	0.999999	111.166	0.999999	55.5749	0.999999
0.810507	0.999999	2.837	0.999999	0.792368	0.999999	2.837	0.999999	0.862354	0.999999	111.18	0.999999	55.5811	0.999999
0.8106	0.999999	2.83716	0.999999	0.792379	0.999999	2.83716	0.999999	0.862361	0.999999	111.183	0.999999	55.5902	0.999999
0.810663	0.999999	2.83719	0.999999	0.792397	0.999999	2.83719	0.999999	0.862373	0.999999	111.198	0.999999	55.5966	0.999999
0.810666	0.999999	2.83723	0.999999	0.792494	0.999999	2.83723	0.999999	0.862375	0.999999	111.208	0.999999	55.5984	0.999999
0.810806	0.999999	2.83724	0.999999	0.792497	0.999999	2.83724	0.999999	0.862375	0.999999	111.219	0.999999	55.5986	0.999999
0.810868	0.999999	2.83729	0.999999	0.792516	0.999999	2.83729	0.999999	0.862399	0.999999	111.232	0.999999	55.6015	0.999999
0.81089	0.999999	2.8373	0.999999	0.792536	0.999999	2.8373	0.999999	0.862402	0.999999	111.239	0.999999	55.6058	0.999999
0.810939	0.999999	2.83742	0.999999	0.792652	0.999999	2.83742	0.999999	0.862403	0.999999	111.242	0.999999	55.6093	0.999999
0.810972	0.999999	2.83755	0.999999	0.792658	0.999999	2.83755	0.999999	0.862407	0.999999	111.247	0.999999	55.6112	0.999999
0.810996	0.999999	2.83759	0.999999	0.792664	0.999999	2.83759	0.999999	0.862431	0.999999	111.28	0.999999	55.613	0.999999
0.811016	0.999999	2.83819	0.999999	0.792677	0.999999	2.83819	0.999999	0.862432	0.999999	111.293	0.999999	55.6139	0.999999
0.811298	0.999999	2.8382	0.999999	0.792681	0.999999	2.8382	0.999999	0.862435	0.999999	111.37	0.999999	55.6147	0.999999
0.811317	0.999999	2.83821	0.999999	0.792684	0.999999	2.83821	0.999999	0.862474	0.999999	111.371	0.999999	55.6185	0.999999
0.811389	0.999999	2.83848	0.999999	0.792687	0.999999	2.83848	0.999999	0.862476	0.999999	111.397	0.999999	55.6235	0.999999
0.811638	0.999999	2.83881	0.999999	0.792718	0.999999	2.83881	0.999999	0.862483	0.999999	111.406	0.999999	55.6268	0.999999
0.81181	0.999999	2.83903	0.999999	0.792768	0.999999	2.83903	0.999999	0.862503	0.999999	111.41	0.999999	55.6274	0.999999
0.811919	0.999999	2.8393	0.999999	0.792812	0.999999	2.8393	0.999999	0.862553	0.999999	111.413	0.999999	55.6305	0.999999
0.812103	0.999999	2.83932	0.999999	0.792827	0.999999	2.83932	0.999999	0.862571	0.999999	111.42	0.999999	55.6309	0.999999
0.812125	0.999999	2.83938	0.999999	0.792857	0.999999	2.83938	0.999999	0.862588	0.999999	111.443	0.999999	55.6341	0.999999
0.812487	0.999999	2.83948	0.999999	0.79286	0.999999	2.83948	0.999999	0.862591	0.999999	111.451	0.999999	55.6386	0.999999
0.812603	0.999999	2.83968	0.999999	0.792892	0.999999	2.83968	0.999999	0.862609	0.999999	111.471	0.999999	55.6389	0.999999
0.812635	0.999999	2.83984	0.999999	0.792944	0.999999	2.83984	0.999999	0.862614	0.999999	111.483	0.999999	55.6426	0.999999
0.812815	0.999999	2.83995	0.999999	0.792966	0.999999	2.83995	0.999999	0.862628	0.999999	111.493	0.999999	55.6462	0.999999
0.812862	0.999999	2.83997	0.999999	0.793075	0.999999	2.83997	0.999999	0.862632	0.999999	111.495	0.999999	55.6465	0.999999
0.813259	0.999999	2.83998	0.999999	0.793102	0.999999	2.83998	0.999999	0.862671	0.999999	111.508	0.999999	55.658	0.999999
0.813303	0.999999	2.84002	0.999999	0.793136	0.999999	2.84002	0.999999	0.862672	0.999999	111.524	0.999999	55.6592	0.999999
0.813304	0.999999	2.84005	0.999999	0.793151	0.999999	2.84005	0.999999	0.862685	0.999999	111.527	0.999999	55.6596	0.999999
0.813461	0.999999	2.84005	0.999999	0.793204	0.999999	2.84005	0.999999	0.862702	0.999999	111.54	0.999999	55.6606	0.999999
0.813462	0.999999	2.84039	0.999999	0.793228	0.999999	2.84039	0.999999	0.862703	0.999999	111.561	0.999999	55.6624	0.999999
0.813486	0.999999	2.84129	0.999999	0.79324	0.999999	2.84129	0.999999	0.862707	0.999999	111.605	0.999999	55.6636	0.999999
0.813502	0.999999	2.84131	0.999999	0.793248	0.999999	2.84131	0.999999	0.862713	0.999999	111.611	0.999999	55.6643	0.999999
0.813552	0.999999	2.84138	0.999999	0.793254	0.999999	2.84138	0.999999	0.862747	0.999999	111.615	0.999999	55.6659	0.999999
0.813624	0.999999	2.84141	0.999999	0.793265	0.999999	2.84141	0.999999	0.862784	0.999999	111.62	0.999999	55.6666	0.999999
0.813662	0.999999	2.84148	0.999999	0.793283	0.999999	2.84148	0.999999	0.862789	0.999999	111.639	0.999999	55.6704	0.999999
0.813813	0.999999	2.84169	0.999999	0.793326	0.999999	2.84169	0.999999	0.86279	0.999999	111.655	0.999999	55.6714	0.999999
0.813937	0.999999	2.84176	0.999999	0.793334	0.999999	2.84176	0.999999	0.862792	0.999999	111.661	0.999999	55.6747	0.999999
0.813965	0.999999	2.84187	0.999999	0.793342	0.999999	2.84187	0.999999	0.862811	0.999999	111.664	0.999999	55.6898	0.999999
0.813991	0.999999	2.84193	0.999999	0.793377	0.999999	2.84193	0.999999	0.862821	0.999999	111.667	0.999999	55.6957	0.999999
0.814042	0.999999	2.84252	0.999999	0.79339	0.999999	2.84252	0.999999	0.862823	0.999999	111.683	0.999999	55.6973	0.999999
0.814394	0.999999	2.84258	0.999999	0.793396	0.999999	2.84258	0.999999	0.862824	0.999999	111.758	0.999999	55.7043	0.999999
0.814575	0.999999	2.84274	0.999999	0.793398	0.999999	2.84274	0.999999	0.862825	0.999999	111.798	0.999999	55.7083	0.999999
0.814582	0.999999	2.84302	0.999999	0.793402	0.999999	2.84302	0.999999	0.862837	0.999999	111.804	0.999999	55.7109	0.999999
0.814647	0.999999	2.84348	0.999999	0.793408	0.999999	2.84348	0.999999	0.862858	0.999999	111.807	0.999999	55.7122	0.999999
0.814751	0.999999	2.84357	0.999999	0.793415	0.999999	2.84357	0.999999	0.86287	0.999999	111.817	0.999999	55.7204	0.999999
0.814912	0.999999	2.8437	0.999999	0.793455	0.999999	2.8437	0.999999	0.862874	0.999999	111.821	0.999999	55.7207	0.999999
0.815155	0.999999	2.8438	0.999999	0.793494	0.999999	2.8438	0.999999	0.862913	0.999999	111.826	0.999999	55.7254	0.999999
0.815156	0.999999	2.84391	0.999999	0.793546	0.999999	2.84391	0.999999	0.862926	0.999999	111.837	0.999999	55.7254	0.999999
0.815179	0.999999	2.84398	0.999999	0.793595	0.999999	2.84398	0.999999	0.862967	0.999999	111.845	0.999999	55.7271	0.999999
0.815211	0.999999	2.84425	0.999999	0.793596	0.999999	2.84425	0.999999	0.862974	0.999999	111.853	0.999999	55.73	0.999999
0.815277	0.999999	2.84459	0.999999	0.793623	0.999999	2.84459	0.999999	0.862992	0.999999	111.872	0.999999	55.7371	0.999999
0.815398	0.999999	2.84499	0.999999	0.793634	0.999999	2.84499	0.999999	0.862999	0.999999	111.897	0.999999	55.7406	0.999999
0.815605	0.999999	2.84499	0.999999	0.793697	0.999999	2.84499	0.999999	0.863054	0.999999	111.913	0.999999	55.741	0.999999
0.815711	0.999999	2.84502	0.999999	0.793731	0.999999	2.84502	0.999999	0.863056	0.999999	111.94	0.999999	55.7426	0.999999
0.816225	0.999999	2.84509	0.999999	0.793732	0.999999	2.84509	0.999999	0.863064	0.999999	111.948	0.999999	55.7433	0.999999
0.816288	0.999999	2.8454	0.999999	0.793735	0.999999	2.8454	0.999999	0.863083	0.999999	111.973	0.999999	55.7469	0.999999
0.816393	0.999999	2.84545	0.999999	0.793735	0.999999	2.84545	0.999999	0.863086	0.999999	112.007	0.999999	55.7476	0.999999
0.81648	0.999999	2.84549	0.999999	0.793785	0.999999	2.84549	0.999999	0.863109	0.999999	112.046	0.999999	55.7551	0.999999
0.816584	0.999999	2.84572	0.999999	0.793789	0.999999	2.84572	0.999999	0.863112	0.999999	112.047	0.999999	55.7551	0.999999
0.816631	0.999999	2.84576	0.999999	0.793802	0.999999	2.84576	0.999999	0.863163	0.999999	112.075	0.999999	55.7554	0.999999
0.816841	0.999999	2.84579	0.999999	0.793837	0.999999	2.84579	0.999999	0.863215	0.999999	112.089	0.999999	55.7557	0.999999
0.816932	0.999999	2.84593	0.999999	0.793845	0.999999	2.84593	0.999999	0.863217	0.999999	112.089	0.999999	55.7562	0.999999
0.81697	0.999999	2.84598	0.999999	0.793859	0.999999	2.84598	0.999999	0.86322	0.999999	112.112	0.999999	55.7588	0.999999
0.8172	0.999999	2.84614	0.999999	0.793906	0.999999	2.84614	0.999999	0.863221	0.999999	112.128	0.999999	55.7627	0.999999
0.817403	0.999999	2.84618	0.999999	0.79391	0.999999	2.84618	0.999999	0.863224	0.999999	112.128	0.999999	55.7695	0.999999
0.817649	0.999999	2.84622	0.999999	0.793913	0.999999	2.84622	0.999999	0.863227	0.999999	112.129	0.999999	55.774	0.999999
0.817705	0.999999	2.84627	0.999999	0.79393	0.999999	2.84627	0.999999	0.863242	0.999999	112.134	0.999999	55.7756	0.999999
0.817865	0.999999	2.8463	0.999999	0.793934	0.999999	2.8463	0.999999	0.863248	0.999999	112.166	0.999999	55.776	0.999999
0.817891	0.999999	2.84631	0.999999	0.793967	0.999999	2.84631	0.999999	0.863274	0.999999	112.178	0.999999	55.7783	0.999999
0.818003	0.999999	2.84665	0.999999	0.793984	0.999999	2.84665	0.999999	0.863276	0.999999	112.179	0.999999	55.7803	0.999999
0.818148	0.999999	2.84666	0.999999	0.794067	0.999999	2.84666	0.999999	0.863333	0.999999	112.195	0.999999	55.7804	0.999999
0.81815	0.999999	2.84674	0.999999	0.794107	0.999999	2.84674	0.999999	0.863338	0.999999	112.203	0.999999	55.7818	0.999999
0.818335	0.999999	2.84686	0.999999	0.794135	0.999999	2.84686	0.999999	0.863367	0.999999	112.204	0.999999	55.7898	0.999999
0.818346	0.999999	2.84696	0.999999	0.794172	0.999999	2.84696	0.999999	0.86337	0.999999	112.204	0.999999	55.7964	0.999999
0.818415	0.999999	2.84706	0.999999	0.794192	0.999999	2.84706	0.999999	0.8634	0.999999	112.241	0.999999	55.797	0.999999
0.818727	0.999999	2.84706	0.999999	0.794253	0.999999	2.84706	0.999999	0.863403	0.999999	112.251	0.999999	55.7986	0.999999
0.819049	0.999999	2.84719	0.999999	0.794254	0.999999	2.84719	0.999999	0.863411	0.999999	112.274	0.999999	55.7998	0.999999
0.819171	0.999999	2.84723	0.999999	0.794261	0.999999	2.84723	0.999999	0.86344	0.999999	112.284	0.999999	55.8047	0.999999
0.819271	0.999999	2.84725	0.999999	0.79433	0.999999	2.84725	0.999999	0.863459	0.999999	112.301	0.999999	55.8063	0.999999
0.819739	0.999999	2.84731	0.999999	0.794368	0.999999	2.84731	0.999999	0.863482	0.999999	112.322	0.999999	55.8123	0.999999
0.819855	0.999999	2.84749	0.999999	0.794397	0.999999	2.84749	0.999999	0.863483	0.999999	112.327	0.999999	55.8131	0.999999
0.820216	0.999999	2.8475	0.999999	0.794412	0.999999	2.8475	0.999999	0.863498	0.999999	112.328	0.999999	55.8159	0.999999
0.820279	0.999999	2.84755	0.999999	0.794422	0.999999	2.84755	0.999999	0.863536	0.999999	112.338	0.999999	55.8166	0.999999
0.820295	0.999999	2.84791	0.999999	0.794435	0.999999	2.84791	0.999999	0.863549	0.999999	112.373	0.999999	55.823	0.999999
0.820342	0.999999	2.84817	0.999999	0.794452	0.999999	2.84817	0.999999	0.863562	0.999999	112.398	0.999999	55.8239	0.999999
0.820435	0.999999	2.84821	0.999999	0.794487	0.999999	2.84821	0.999999	0.863563	0.999999	112.44	0.999999	55.8246	0.999999
0.82046	0.999999	2.84905	0.999999	0.794499	0.999999	2.84905	0.999999	0.863624	0.999999	112.443	0.999999	55.828	0.999999
0.820661	0.999999	2.84905	0.999999	0.794532	0.999999	2.84905	0.999999	0.863632	0.999999	112.444	0.999999	55.8286	0.999999
0.820868	0.999999	2.84907	0.999999	0.794557	0.999999	2.84907	0.999999	0.863657	0.999999	112.448	0.999999	55.8305	0.999999
0.820908	0.999999	2.84921	0.999999	0.794583	0.999999	2.84921	0.999999	0.863691	0.999999	112.46	0.999999	55.8354	0.999999
0.820977	0.999999	2.84924	0.999999	0.794655	0.999999	2.84924	0.999999	0.863713	0.999999	112.475	0.999999	55.8384	0.999999
0.821285	0.999999	2.84925	0.999999	0.794656	0.999999	2.84925	0.999999	0.863721	0.999999	112.492	0.999999	55.845	0.999999
0.821358	0.999999	2.84936	0.999999	0.794659	0.999999	2.84936	0.999999	0.863732	0.999999	112.495	0.999999	55.8498	0.999999
0.821427	0.999999	2.84939	0.999999	0.794664	0.999999	2.84939	0.999999	0.863747	0.999999	112.514	0.999999	55.8559	0.999999
0.821555	0.999999	2.84988	0.999999	0.794666	0.999999	2.84988	0.999999	0.863751	0.999999	112.553	0.999999	55.8582	0.999999
0.821591	0.999999	2.84989	0.999999	0.794708	0.999999	2.84989	0.999999	0.863758	0.999999	112.558	0.999999	55.8593	0.999999
0.821627	0.999999	2.84992	0.999999	0.794709	0.999999	2.84992	0.999999	0.863763	0.999999	112.57	0.999999	55.8617	0.999999
0.821671	0.999999	2.85012	0.999999	0.794714	0.999999	2.85012	0.999999	0.863765	0.999999	112.616	0.999999	55.8663	0.999999
0.821927	0.999999	2.85026	0.999999	0.794744	0.999999	2.85026	0.999999	0.863784	0.999999	112.619	0.999999	55.8716	0.999999
0.821958	0.999999	2.85051	0.999999	0.794781	0.999999	2.85051	0.999999	0.863808	0.999999	112.62	0.999999	55.8718	0.999999
0.821969	0.999999	2.85074	0.999999	0.794793	0.999999	2.85074	0.999999	0.863817	0.999999	112.627	0.999999	55.8743	0.999999
0.822127	0.999999	2.85077	0.999999	0.794797	0.999999	2.85077	0.999999	0.863817	0.999999	112.645	0.999999	55.8803	0.999999
0.82213	0.999999	2.85082	0.999999	0.794814	0.999999	2.85082	0.999999	0.86385	0.999999	112.654	0.999999	55.8835	0.999999
0.8222	0.999999	2.85092	0.999999	0.794824	0.999999	2.85092	0.999999	0.863873	0.999999	112.678	0.999999	55.8892	0.999999
0.822203	0.999999	2.85098	0.999999	0.794831	0.999999	2.85098	0.999999	0.863877	0.999999	112.68	0.999999	55.8948	0.999999
0.822439	0.999999	2.851	0.999999	0.794867	0.999999	2.851	0.999999	0.863904	0.999999	112.686	0.999999	55.895	0.999999
0.822595	0.999999	2.85103	0.999999	0.794869	0.999999	2.85103	0.999999	0.863935	0.999999	112.717	0.999999	55.8967	0.999999
0.822649	0.999999	2.85124	0.999999	0.794888	0.999999	2.85124	0.999999	0.863953	0.999999	112.725	0.999999	55.9002	0.999999
0.822726	0.999999	2.85125	0.999999	0.794894	0.999999	2.85125	0.999999	0.863964	0.999999	112.729	0.999999	55.9057	0.999999
0.822762	0.999999	2.85165	0.999999	0.794939	0.999999	2.85165	0.999999	0.863984	0.999999	112.737	0.999999	55.9083	0.999999
0.823128	0.999999	2.85169	0.999999	0.794971	0.999999	2.85169	0.999999	0.86399	0.999999	112.747	0.999999	55.9155	0.999999
0.823272	0.999999	2.85179	0.999999	0.794973	0.999999	2.85179	0.999999	0.863994	0.999999	112.769	0.999999	55.9191	0.999999
0.823519	0.999999	2.85197	0.999999	0.794995	0.999999	2.85197	0.999999	0.864006	0.999999	112.78	0.999999	55.9203	0.999999
0.823542	0.999999	2.85198	0.999999	0.795009	0.999999	2.85198	0.999999	0.864025	0.999999	112.782	0.999999	55.9207	0.999999
0.823565	0.999999	2.85211	0.999999	0.795016	0.999999	2.85211	0.999999	0.864027	0.999999	112.783	0.999999	55.9225	0.999999
0.823666	0.999999	2.85224	0.999999	0.795041	0.999999	2.85224	0.999999	0.86403	0.999999	112.803	0.999999	55.9244	0.999999
0.823719	0.999999	2.8523	0.999999	0.795042	0.999999	2.8523	0.999999	0.864055	0.999999	112.826	0.999999	55.9268	0.999999
0.823733	0.999999	2.85268	0.999999	0.795049	0.999999	2.85268	0.999999	0.86408	0.999999	112.829	0.999999	55.9319	0.999999
0.823841	0.999999	2.85276	0.999999	0.795053	0.999999	2.85276	0.999999	0.864097	0.999999	112.838	0.999999	55.9338	0.999999
0.824065	0.999999	2.85277	0.999999	0.795096	0.999999	2.85277	0.999999	0.864124	0.999999	112.859	0.999999	55.9432	0.999999
0.824111	0.999999	2.85291	0.999999	0.79511	0.999999	2.85291	0.999999	0.864132	0.999999	112.868	0.999999	55.9436	0.999999
0.824299	0.999999	2.85335	0.999999	0.795127	0.999999	2.85335	0.999999	0.864134	0.999999	112.869	0.999999	55.9443	0.999999
0.824364	0.999999	2.85338	0.999999	0.795136	0.999999	2.85338	0.999999	0.864149	0.999999	112.91	0.999999	55.9461	0.999999
0.824451	0.999999	2.85342	0.999999	0.795157	0.999999	2.85342	0.999999	0.864168	0.999999	112.917	0.999999	55.9487	0.999999
[truncated: 3,042 more rows]

## Sheet: fig 2
C	MSE	Enr	MSE	H	MSE	Ent	MSE	Corr	MSE	M	MSE	Std	Corr
0.40416	5.95	0.05984	5.95	0.74946	5.95	2.34966	5.95	0.78487	5.95	80.2866	5.95	35.7771	5.95
0.40982	5.17	0.05987	5.17	0.74956	5.17	2.36611	5.17	0.78494	5.17	80.4036	5.17	36.2881	5.17
0.41262	5.54	0.05991	5.54	0.74979	5.54	2.37018	5.54	0.78501	5.54	80.5292	5.54	36.3254	5.54
0.41585	5.59	0.05994	5.59	0.74982	5.59	2.38036	5.59	0.78504	5.59	80.6431	5.59	36.827	5.59
0.41865	5.56	0.05994	5.56	0.74983	5.56	2.38731	5.56	0.7852	5.56	80.8359	5.56	36.8662	5.56
0.41939	5.96	0.05996	5.96	0.74984	5.96	2.39218	5.96	0.78527	5.96	81.1036	5.96	36.8829	5.96
0.42425	5.3	0.06013	5.3	0.74986	5.3	2.39432	5.3	0.7853	5.3	81.1166	5.3	37.3305	5.3
0.42628	5.49	0.06013	5.49	0.74988	5.49	2.40198	5.49	0.78654	5.49	81.2066	5.49	37.3591	5.49
0.42631	5.54	0.06025	5.54	0.74989	5.54	2.40973	5.54	0.78667	5.54	81.3113	5.54	37.4084	5.54
0.4268	5.24	0.06027	5.24	0.74992	5.24	2.41136	5.24	0.78667	5.24	81.4223	5.24	37.4283	5.24
0.43364	5.73	0.06031	5.73	0.74994	5.73	2.41583	5.73	0.78679	5.73	81.4288	5.73	37.8216	5.73
0.43392	5.74	0.06034	5.74	0.74998	5.74	2.41625	5.74	0.78683	5.74	81.6295	5.74	37.9131	5.74
0.43447	5.61	0.06034	5.61	0.74999	5.61	2.42424	5.61	0.78684	5.61	81.7127	5.61	37.9165	5.61
0.43558	5.4	0.06039	5.4	0.75005	5.4	2.42802	5.4	0.78705	5.4	81.9029	5.4	37.9177	5.4
0.43974	5.79	0.06042	5.79	0.75012	5.79	2.43357	5.79	0.78735	5.79	81.9251	5.79	37.9752	5.79
0.44268	5.64	0.06061	5.64	0.75015	5.64	2.43395	5.64	0.78743	5.64	81.9778	5.64	38.2392	5.64
0.44313	5.29	0.06061	5.29	0.75016	5.29	2.43888	5.29	0.78773	5.29	81.9955	5.29	38.3912	5.29
0.4442	5.23	0.06062	5.23	0.75019	5.23	2.43937	5.23	0.78782	5.23	82.0791	5.23	38.4585	5.23
0.44544	5.63	0.06068	5.63	0.75022	5.63	2.44404	5.63	0.78788	5.63	82.1799	5.63	38.4748	5.63
0.4489	5.35	0.06075	5.35	0.75022	5.35	2.44852	5.35	0.78825	5.35	82.2152	5.35	38.4972	5.35
0.45199	5.66	0.06076	5.66	0.75023	5.66	2.45095	5.66	0.78837	5.66	82.2265	5.66	38.5168	5.66
0.45217	5.67	0.06077	5.67	0.75025	5.67	2.45668	5.67	0.78842	5.67	82.3867	5.67	38.6148	5.67
0.45222	5.75	0.06084	5.75	0.75029	5.75	2.4576	5.75	0.78848	5.75	82.5228	5.75	38.8263	5.75
0.45317	5.53	0.06094	5.53	0.75029	5.53	2.46178	5.53	0.78849	5.53	82.5518	5.53	38.9647	5.53
0.45537	5.43	0.06095	5.43	0.7503	5.43	2.46234	5.43	0.78856	5.43	82.6697	5.43	38.9816	5.43
0.45623	5.59	0.06096	5.59	0.75033	5.59	2.46333	5.59	0.78857	5.59	82.77	5.59	39.0122	5.59
0.45732	5.69	0.06097	5.69	0.75033	5.69	2.4673	5.69	0.78863	5.69	82.795	5.69	39.0718	5.69
0.46174	5.82	0.06104	5.82	0.75035	5.82	2.47282	5.82	0.78863	5.82	82.8235	5.82	39.1113	5.82
0.46217	5.27	0.06107	5.27	0.75036	5.27	2.4739	5.27	0.78875	5.27	82.8711	5.27	39.1655	5.27
0.46375	5.34	0.06108	5.34	0.75037	5.34	2.48095	5.34	0.78883	5.34	82.8878	5.34	39.2244	5.34
0.46401	5.73	0.06108	5.73	0.75037	5.73	2.48119	5.73	0.78884	5.73	82.9684	5.73	39.4161	5.73
0.46412	5.16	0.06109	5.16	0.7504	5.16	2.48148	5.16	0.78892	5.16	83.0092	5.16	39.5153	5.16
0.46428	5.53	0.0611	5.53	0.75052	5.53	2.4822	5.53	0.78914	5.53	83.037	5.53	39.5296	5.53
0.46678	5.7	0.06115	5.7	0.75063	5.7	2.48589	5.7	0.78934	5.7	83.1578	5.7	39.613	5.7
0.46739	5.76	0.06124	5.76	0.75065	5.76	2.48788	5.76	0.78943	5.76	83.2509	5.76	39.6486	5.76
0.46875	5.34	0.06142	5.34	0.75066	5.34	2.49097	5.34	0.78955	5.34	83.3252	5.34	39.6884	5.34
0.47022	5.98	0.06142	5.98	0.75073	5.98	2.49633	5.98	0.78956	5.98	83.3306	5.98	39.775	5.98
0.47218	5.69	0.06145	5.69	0.75075	5.69	2.4992	5.69	0.7896	5.69	83.3487	5.69	39.7878	5.69
0.4731	5.52	0.06146	5.52	0.75078	5.52	2.49947	5.52	0.78961	5.52	83.4524	5.52	39.8368	5.52
0.47375	5.72	0.06156	5.72	0.75078	5.72	2.50132	5.72	0.78963	5.72	83.4539	5.72	39.9802	5.72
0.47519	5.79	0.06162	5.79	0.7508	5.79	2.5014	5.79	0.78978	5.79	83.4662	5.79	40.0996	5.79
0.47581	5.22	0.06163	5.22	0.75088	5.22	2.50624	5.22	0.78984	5.22	83.4958	5.22	40.1629	5.22
0.47685	5.91	0.06168	5.91	0.75091	5.91	2.50646	5.91	0.78985	5.91	83.501	5.91	40.1874	5.91
0.47725	5.72	0.06169	5.72	0.75091	5.72	2.50859	5.72	0.79004	5.72	83.564	5.72	40.2509	5.72
0.4799	5.42	0.06169	5.42	0.75093	5.42	2.50862	5.42	0.79032	5.42	83.6103	5.42	40.2585	5.42
0.48073	5.55	0.06172	5.55	0.75094	5.55	2.5093	5.55	0.79041	5.55	83.6125	5.55	40.2952	5.55
0.48088	5.51	0.06175	5.51	0.75096	5.51	2.5098	5.51	0.79112	5.51	83.6334	5.51	40.395	5.51
0.48144	5.58	0.06179	5.58	0.751	5.58	2.5105	5.58	0.79122	5.58	83.638	5.58	40.4157	5.58
0.48228	5.47	0.0618	5.47	0.75105	5.47	2.51149	5.47	0.79148	5.47	83.647	5.47	40.4244	5.47
0.48376	5.59	0.06186	5.59	0.75109	5.59	2.51165	5.59	0.79181	5.59	83.6934	5.59	40.5636	5.59
0.48426	5.76	0.06196	5.76	0.75109	5.76	2.51571	5.76	0.79186	5.76	83.7069	5.76	40.6425	5.76
0.48664	5.38	0.06202	5.38	0.75111	5.38	2.51607	5.38	0.79189	5.38	83.7642	5.38	40.7083	5.38
0.48835	5.06	0.06208	5.06	0.75113	5.06	2.51636	5.06	0.79262	5.06	83.7719	5.06	40.7762	5.06
0.48903	5.49	0.06209	5.49	0.75114	5.49	2.51665	5.49	0.79263	5.49	83.7769	5.49	40.7877	5.49
0.49076	5.59	0.06212	5.59	0.75114	5.59	2.51697	5.59	0.79267	5.59	83.8035	5.59	40.8396	5.59
0.49077	5.23	0.06212	5.23	0.75115	5.23	2.51727	5.23	0.79307	5.23	83.8065	5.23	40.8615	5.23
0.49123	5.47	0.06213	5.47	0.75118	5.47	2.51762	5.47	0.79317	5.47	83.82	5.47	40.9006	5.47
0.49201	5.65	0.06215	5.65	0.7512	5.65	2.51769	5.65	0.79326	5.65	83.8221	5.65	40.9177	5.65
0.4928	6.11	0.06215	6.11	0.75121	6.11	2.5179	6.11	0.79334	6.11	83.8584	6.11	41.0188	6.11
0.4929	5.8	0.06215	5.8	0.75123	5.8	2.51818	5.8	0.79352	5.8	83.8702	5.8	41.0244	5.8
0.49524	5.61	0.06216	5.61	0.75123	5.61	2.52167	5.61	0.79356	5.61	83.9165	5.61	41.1124	5.61
0.49693	5.23	0.06218	5.23	0.75126	5.23	2.52307	5.23	0.79356	5.23	83.9267	5.23	41.1969	5.23
0.49801	5.73	0.06218	5.73	0.7513	5.73	2.52465	5.73	0.79363	5.73	83.9827	5.73	41.2112	5.73
0.49949	5.83	0.06218	5.83	0.75135	5.83	2.52498	5.83	0.79365	5.83	83.9891	5.83	41.2777	5.83
0.50048	5.44	0.06222	5.44	0.75138	5.44	2.52624	5.44	0.79373	5.44	84.0033	5.44	41.3599	5.44
0.50102	5.42	0.06224	5.42	0.7514	5.42	2.52734	5.42	0.79383	5.42	84.0755	5.42	41.3817	5.42
0.5012	5.63	0.06227	5.63	0.75147	5.63	2.52739	5.63	0.79384	5.63	84.0858	5.63	41.4294	5.63
0.50214	5.95	0.0623	5.95	0.75148	5.95	2.52883	5.95	0.79387	5.95	84.087	5.95	41.4636	5.95
0.50294	5.58	0.06231	5.58	0.75149	5.58	2.52902	5.58	0.79398	5.58	84.0905	5.58	41.482	5.58
0.50302	5.63	0.06233	5.63	0.75151	5.63	2.53008	5.63	0.79399	5.63	84.0906	5.63	41.4879	5.63
0.505	5.33	0.06238	5.33	0.75154	5.33	2.53059	5.33	0.79401	5.33	84.1372	5.33	41.532	5.33
0.50539	5.41	0.06239	5.41	0.75155	5.41	2.53114	5.41	0.79403	5.41	84.1668	5.41	41.5525	5.41
0.50843	5.1	0.06241	5.1	0.75158	5.1	2.53182	5.1	0.79405	5.1	84.1669	5.1	41.6365	5.1
0.50883	5.73	0.06241	5.73	0.75159	5.73	2.53334	5.73	0.79417	5.73	84.1817	5.73	41.7261	5.73
0.50992	5.4	0.06243	5.4	0.75161	5.4	2.53339	5.4	0.79428	5.4	84.2281	5.4	41.7723	5.4
0.51015	6.04	0.06243	6.04	0.75162	6.04	2.53343	6.04	0.79439	6.04	84.2611	6.04	41.8324	6.04
0.51088	5.34	0.0625	5.34	0.75165	5.34	2.53387	5.34	0.79445	5.34	84.2819	5.34	41.8398	5.34
0.51114	5.47	0.06252	5.47	0.75167	5.47	2.53413	5.47	0.79447	5.47	84.3012	5.47	41.8722	5.47
0.51223	5.62	0.06254	5.62	0.75167	5.62	2.535	5.62	0.7945	5.62	84.3846	5.62	41.9099	5.62
0.51266	5.36	0.06254	5.36	0.75175	5.36	2.53679	5.36	0.79451	5.36	84.3875	5.36	42.0104	5.36
0.51353	5.25	0.06255	5.25	0.75179	5.25	2.53829	5.25	0.79477	5.25	84.3947	5.25	42.0287	5.25
0.51374	5.58	0.06258	5.58	0.75181	5.58	2.5385	5.58	0.79518	5.58	84.4252	5.58	42.1081	5.58
0.51395	5.4	0.06261	5.4	0.75181	5.4	2.54205	5.4	0.79518	5.4	84.4373	5.4	42.1102	5.4
0.51467	5.61	0.06263	5.61	0.75181	5.61	2.54207	5.61	0.79527	5.61	84.4394	5.61	42.1137	5.61
0.51479	5.38	0.06266	5.38	0.75184	5.38	2.54276	5.38	0.79528	5.38	84.4452	5.38	42.1557	5.38
0.51495	5.8	0.06266	5.8	0.75188	5.8	2.54277	5.8	0.79574	5.8	84.4638	5.8	42.1624	5.8
0.5155	5.64	0.0627	5.64	0.75188	5.64	2.54325	5.64	0.79584	5.64	84.4799	5.64	42.1656	5.64
0.51638	5.55	0.06271	5.55	0.75193	5.55	2.54486	5.55	0.79626	5.55	84.4822	5.55	42.3498	5.55
0.51731	5.8	0.06271	5.8	0.75194	5.8	2.54612	5.8	0.79628	5.8	84.5045	5.8	42.3906	5.8
0.51991	5.32	0.06272	5.32	0.75194	5.32	2.54644	5.32	0.7965	5.32	84.6209	5.32	42.4128	5.32
0.52033	5.43	0.06273	5.43	0.75195	5.43	2.54733	5.43	0.79652	5.43	84.6237	5.43	42.4414	5.43
0.52094	5.56	0.06273	5.56	0.75196	5.56	2.54784	5.56	0.79681	5.56	84.6311	5.56	42.4677	5.56
0.521	5.01	0.06273	5.01	0.75197	5.01	2.54812	5.01	0.7971	5.01	84.6422	5.01	42.4951	5.01
0.52211	5.75	0.06274	5.75	0.75198	5.75	2.54939	5.75	0.7972	5.75	84.6563	5.75	42.5061	5.75
0.52324	5.17	0.06278	5.17	0.75201	5.17	2.54959	5.17	0.79724	5.17	84.6943	5.17	42.5491	5.17
0.52384	5.72	0.06278	5.72	0.75215	5.72	2.55018	5.72	0.79728	5.72	84.6992	5.72	42.571	5.72
0.52409	5.34	0.0628	5.34	0.75217	5.34	2.55081	5.34	0.79739	5.34	84.708	5.34	42.6923	5.34
0.52443	5.6	0.06281	5.6	0.7522	5.6	2.55111	5.6	0.79741	5.6	84.7308	5.6	42.7341	5.6
0.52473	5.75	0.06282	5.75	0.75221	5.75	2.55121	5.75	0.79744	5.75	84.7328	5.75	42.7668	5.75
0.52544	6.1	0.06284	6.1	0.75222	6.1	2.5529	6.1	0.79747	6.1	84.7446	6.1	42.7691	6.1
0.52562	5.72	0.06285	5.72	0.75223	5.72	2.55305	5.72	0.7975	5.72	84.747	5.72	42.7914	5.72
0.52577	5.37	0.06285	5.37	0.75223	5.37	2.55399	5.37	0.79752	5.37	84.7541	5.37	42.845	5.37
0.52711	5.76	0.06289	5.76	0.75224	5.76	2.55477	5.76	0.79846	5.76	84.7747	5.76	42.8787	5.76
0.52728	5.28	0.06289	5.28	0.75227	5.28	2.55499	5.28	0.79853	5.28	84.816	5.28	42.986	5.28
0.52752	4.94	0.06295	4.94	0.75235	4.94	2.55653	4.94	0.79856	4.94	84.8208	4.94	43.0128	4.94
0.52807	5.52	0.06296	5.52	0.75235	5.52	2.55702	5.52	0.7986	5.52	84.8718	5.52	43.0295	5.52
0.52879	5.3	0.06298	5.3	0.75237	5.3	2.55705	5.3	0.79868	5.3	84.9067	5.3	43.0705	5.3
0.52898	5.58	0.06298	5.58	0.75253	5.58	2.55868	5.58	0.7987	5.58	84.9074	5.58	43.0761	5.58
0.52936	5.27	0.06299	5.27	0.75261	5.27	2.55881	5.27	0.79871	5.27	84.9564	5.27	43.0862	5.27
0.52957	5.82	0.06299	5.82	0.75267	5.82	2.55911	5.82	0.79885	5.82	84.9634	5.82	43.1191	5.82
0.53014	5.61	0.063	5.61	0.75272	5.61	2.55928	5.61	0.79893	5.61	84.9643	5.61	43.1191	5.61
0.53017	5.55	0.06302	5.55	0.75276	5.55	2.55982	5.55	0.79893	5.55	84.9844	5.55	43.1298	5.55
0.53146	5.88	0.06304	5.88	0.75277	5.88	2.55989	5.88	0.79903	5.88	85.006	5.88	43.1512	5.88
0.532	5.49	0.06304	5.49	0.75278	5.49	2.5602	5.49	0.79915	5.49	85.0591	5.49	43.1546	5.49
0.53224	5.66	0.06305	5.66	0.75278	5.66	2.56037	5.66	0.79915	5.66	85.0797	5.66	43.1917	5.66
0.53317	5.71	0.06307	5.71	0.7528	5.71	2.56078	5.71	0.79923	5.71	85.0887	5.71	43.2549	5.71
0.53338	5.73	0.06307	5.73	0.75281	5.73	2.56174	5.73	0.79926	5.73	85.1064	5.73	43.3063	5.73
0.53415	5.72	0.06311	5.72	0.75282	5.72	2.5633	5.72	0.79928	5.72	85.1123	5.72	43.3362	5.72
0.53488	5.18	0.06315	5.18	0.75283	5.18	2.56364	5.18	0.79936	5.18	85.1123	5.18	43.3828	5.18
0.53533	5.41	0.06315	5.41	0.75287	5.41	2.56371	5.41	0.79938	5.41	85.1325	5.41	43.4154	5.41
0.5356	5.73	0.06315	5.73	0.7529	5.73	2.56374	5.73	0.79943	5.73	85.1363	5.73	43.4384	5.73
0.53564	5.7	0.06316	5.7	0.7529	5.7	2.56532	5.7	0.79956	5.7	85.1732	5.7	43.4693	5.7
0.53622	5.74	0.06317	5.74	0.75293	5.74	2.56609	5.74	0.79965	5.74	85.2272	5.74	43.4868	5.74
0.53662	5.6	0.06326	5.6	0.75293	5.6	2.56654	5.6	0.79966	5.6	85.2324	5.6	43.5075	5.6
0.53731	5.44	0.06326	5.44	0.75294	5.44	2.56728	5.44	0.79983	5.44	85.2663	5.44	43.5392	5.44
0.53773	5.38	0.06326	5.38	0.75306	5.38	2.56766	5.38	0.79983	5.38	85.3051	5.38	43.6518	5.38
0.53805	5.76	0.06327	5.76	0.75311	5.76	2.56779	5.76	0.79993	5.76	85.4051	5.76	43.7165	5.76
0.53859	5.23	0.06328	5.23	0.75317	5.23	2.56796	5.23	0.79995	5.23	85.4122	5.23	43.72	5.23
0.53913	5.92	0.06328	5.92	0.75318	5.92	2.5681	5.92	0.80006	5.92	85.4151	5.92	43.7353	5.92
0.54028	5.57	0.06329	5.57	0.75327	5.57	2.56814	5.57	0.80009	5.57	85.4201	5.57	43.7377	5.57
0.54073	5.36	0.06332	5.36	0.75329	5.36	2.56895	5.36	0.80013	5.36	85.4276	5.36	43.7504	5.36
0.54077	5.57	0.06332	5.57	0.75333	5.57	2.56905	5.57	0.80037	5.57	85.442	5.57	43.7524	5.57
0.5409	5.47	0.06335	5.47	0.75335	5.47	2.56981	5.47	0.80039	5.47	85.4813	5.47	43.7554	5.47
0.5411	5.63	0.06336	5.63	0.75339	5.63	2.56992	5.63	0.80042	5.63	85.483	5.63	43.7661	5.63
0.54112	5.46	0.06336	5.46	0.75343	5.46	2.57018	5.46	0.80044	5.46	85.5539	5.46	43.7872	5.46
0.54184	5.48	0.06341	5.48	0.75345	5.48	2.57054	5.48	0.80046	5.48	85.5614	5.48	43.7976	5.48
0.54228	5.63	0.06342	5.63	0.75345	5.63	2.5709	5.63	0.80049	5.63	85.5658	5.63	43.807	5.63
0.54256	5.1	0.06343	5.1	0.75346	5.1	2.5712	5.1	0.8006	5.1	85.57	5.1	43.8081	5.1
0.54337	5.35	0.06345	5.35	0.75347	5.35	2.57153	5.35	0.80072	5.35	85.5728	5.35	43.8881	5.35
0.54346	5.86	0.06345	5.86	0.75349	5.86	2.57167	5.86	0.80081	5.86	85.5905	5.86	43.9726	5.86
0.54346	5.25	0.06346	5.25	0.75351	5.25	2.57169	5.25	0.80081	5.25	85.657	5.25	44.0237	5.25
0.5435	5.43	0.06347	5.43	0.75351	5.43	2.57192	5.43	0.80085	5.43	85.6701	5.43	44.0463	5.43
0.54402	5.55	0.06348	5.55	0.75355	5.55	2.57237	5.55	0.8009	5.55	85.7365	5.55	44.0625	5.55
0.54429	5.29	0.06348	5.29	0.75362	5.29	2.57255	5.29	0.80095	5.29	85.7393	5.29	44.0845	5.29
0.54451	5.53	0.06349	5.53	0.75364	5.53	2.57271	5.53	0.80115	5.53	85.7809	5.53	44.1183	5.53
0.54471	5.22	0.06353	5.22	0.75366	5.22	2.57434	5.22	0.80146	5.22	85.7872	5.22	44.1533	5.22
0.54509	5.48	0.06354	5.48	0.75366	5.48	2.57486	5.48	0.80146	5.48	85.8041	5.48	44.1546	5.48
0.54674	5.09	0.06354	5.09	0.7537	5.09	2.57488	5.09	0.80147	5.09	85.8227	5.09	44.1604	5.09
0.54674	5.77	0.06356	5.77	0.7537	5.77	2.57574	5.77	0.80152	5.77	85.84	5.77	44.1759	5.77
0.54794	5.36	0.06356	5.36	0.75371	5.36	2.57632	5.36	0.80157	5.36	85.842	5.36	44.2317	5.36
0.54798	5.73	0.06357	5.73	0.75372	5.73	2.57674	5.73	0.80161	5.73	85.8653	5.73	44.359	5.73
0.54818	5.27	0.06357	5.27	0.75378	5.27	2.57689	5.27	0.80161	5.27	85.8967	5.27	44.3602	5.27
0.54834	5.69	0.06358	5.69	0.7538	5.69	2.57794	5.69	0.80162	5.69	85.91	5.69	44.3881	5.69
0.5487	5.37	0.06358	5.37	0.75383	5.37	2.57805	5.37	0.80164	5.37	85.9175	5.37	44.3911	5.37
0.55036	5.47	0.06358	5.47	0.75384	5.47	2.57813	5.47	0.80167	5.47	85.9195	5.47	44.4027	5.47
0.55148	5.07	0.0636	5.07	0.75387	5.07	2.57827	5.07	0.80173	5.07	85.9259	5.07	44.4108	5.07
0.55154	5.69	0.0636	5.69	0.754	5.69	2.5784	5.69	0.80174	5.69	85.9625	5.69	44.4274	5.69
0.55179	5.67	0.06364	5.67	0.75401	5.67	2.57842	5.67	0.80177	5.67	85.9729	5.67	44.4461	5.67
0.55188	5.67	0.06365	5.67	0.75407	5.67	2.57843	5.67	0.80192	5.67	85.9766	5.67	44.4523	5.67
0.55206	5.64	0.06368	5.64	0.75408	5.64	2.57918	5.64	0.80205	5.64	85.9948	5.64	44.4633	5.64
0.55208	5.49	0.06368	5.49	0.7541	5.49	2.57946	5.49	0.8021	5.49	85.9982	5.49	44.4693	5.49
0.55238	5.5	0.06369	5.5	0.75416	5.5	2.57964	5.5	0.80223	5.5	86.0036	5.5	44.4708	5.5
0.55328	5.66	0.06369	5.66	0.75416	5.66	2.57984	5.66	0.80238	5.66	86.0208	5.66	44.5265	5.66
0.55429	5.32	0.0637	5.32	0.75417	5.32	2.58032	5.32	0.80246	5.32	86.0839	5.32	44.5421	5.32
0.55429	5.85	0.06371	5.85	0.7543	5.85	2.58037	5.85	0.80252	5.85	86.0984	5.85	44.5857	5.85
0.55469	5.96	0.06372	5.96	0.75443	5.96	2.58037	5.96	0.80254	5.96	86.1266	5.96	44.67	5.96
0.55473	5.51	0.06372	5.51	0.75447	5.51	2.58099	5.51	0.80262	5.51	86.1348	5.51	44.6876	5.51
0.55671	5.43	0.06373	5.43	0.75448	5.43	2.58154	5.43	0.80269	5.43	86.1467	5.43	44.694	5.43
0.55684	5.98	0.06374	5.98	0.75453	5.98	2.58188	5.98	0.80269	5.98	86.1501	5.98	44.7009	5.98
0.55691	5.48	0.06376	5.48	0.75453	5.48	2.58208	5.48	0.8027	5.48	86.1547	5.48	44.7023	5.48
0.5571	5.56	0.06378	5.56	0.75457	5.56	2.58212	5.56	0.8027	5.56	86.1757	5.56	44.7487	5.56
0.55749	5.72	0.0638	5.72	0.75459	5.72	2.58298	5.72	0.8027	5.72	86.1766	5.72	44.7592	5.72
0.5577	5.16	0.06381	5.16	0.75466	5.16	2.58383	5.16	0.8027	5.16	86.2175	5.16	44.8095	5.16
0.55809	5.57	0.06382	5.57	0.75472	5.57	2.58415	5.57	0.80272	5.57	86.2211	5.57	44.87	5.57
0.55811	5.21	0.06383	5.21	0.75474	5.21	2.58452	5.21	0.80272	5.21	86.222	5.21	44.896	5.21
0.55821	5.25	0.06384	5.25	0.75482	5.25	2.58529	5.25	0.80277	5.25	86.2406	5.25	44.9042	5.25
0.55859	5.43	0.06384	5.43	0.75484	5.43	2.58559	5.43	0.80285	5.43	86.2625	5.43	44.9137	5.43
0.55898	5.35	0.06385	5.35	0.75486	5.35	2.58559	5.35	0.80287	5.35	86.2753	5.35	44.9632	5.35
0.55904	5.88	0.06386	5.88	0.75496	5.88	2.58624	5.88	0.80289	5.88	86.2939	5.88	44.9733	5.88
0.5597	5.57	0.06387	5.57	0.75496	5.57	2.58635	5.57	0.8029	5.57	86.3287	5.57	44.9888	5.57
0.55974	5.19	0.06389	5.19	0.75502	5.19	2.58685	5.19	0.80307	5.19	86.3442	5.19	45.0023	5.19
0.56027	5.88	0.06389	5.88	0.75504	5.88	2.58739	5.88	0.80316	5.88	86.357	5.88	45.0165	5.88
0.56043	5.44	0.06389	5.44	0.75505	5.44	2.58764	5.44	0.80316	5.44	86.3765	5.44	45.0329	5.44
0.56107	5.61	0.06391	5.61	0.75507	5.61	2.58817	5.61	0.80322	5.61	86.3801	5.61	45.0437	5.61
0.5618	5.25	0.06391	5.25	0.75509	5.25	2.58848	5.25	0.80323	5.25	86.4051	5.25	45.0483	5.25
0.56184	5.22	0.06392	5.22	0.7551	5.22	2.58853	5.22	0.80326	5.22	86.4102	5.22	45.0762	5.22
0.56184	5.91	0.06393	5.91	0.75516	5.91	2.5886	5.91	0.80326	5.91	86.4646	5.91	45.096	5.91
0.56235	5.9	0.06394	5.9	0.75518	5.9	2.58937	5.9	0.8033	5.9	86.4653	5.9	45.1035	5.9
0.56241	5.59	0.06397	5.59	0.75519	5.59	2.58978	5.59	0.8033	5.59	86.4655	5.59	45.1046	5.59
0.56278	5.34	0.06397	5.34	0.75519	5.34	2.58989	5.34	0.8033	5.34	86.496	5.34	45.1237	5.34
0.56291	5.63	0.06398	5.63	0.7552	5.63	2.58991	5.63	0.80332	5.63	86.5123	5.63	45.126	5.63
0.56324	5.78	0.064	5.78	0.75521	5.78	2.59027	5.78	0.80337	5.78	86.5176	5.78	45.1378	5.78
0.56364	5.43	0.06401	5.43	0.75531	5.43	2.59068	5.43	0.80345	5.43	86.5425	5.43	45.1535	5.43
0.56388	5.45	0.06401	5.45	0.75544	5.45	2.59115	5.45	0.80346	5.45	86.5503	5.45	45.1594	5.45
0.56505	5.58	0.06402	5.58	0.75558	5.58	2.59155	5.58	0.80349	5.58	86.6073	5.58	45.1665	5.58
0.56542	5.43	0.06403	5.43	0.7556	5.43	2.59155	5.43	0.80352	5.43	86.6264	5.43	45.1934	5.43
0.56555	5.35	0.06403	5.35	0.7556	5.35	2.59175	5.35	0.80356	5.35	86.6492	5.35	45.2033	5.35
0.56578	5.43	0.06403	5.43	0.75562	5.43	2.5919	5.43	0.80357	5.43	86.6531	5.43	45.2062	5.43
0.56625	5.58	0.06404	5.58	0.75564	5.58	2.59195	5.58	0.8036	5.58	86.6895	5.58	45.2148	5.58
0.56664	5.96	0.06406	5.96	0.75569	5.96	2.59224	5.96	0.80366	5.96	86.6987	5.96	45.2398	5.96
0.56673	5.78	0.06407	5.78	0.75573	5.78	2.59236	5.78	0.80369	5.78	86.6994	5.78	45.2502	5.78
0.56829	5.83	0.06407	5.83	0.75574	5.83	2.59283	5.83	0.80371	5.83	86.702	5.83	45.261	5.83
0.5685	5.32	0.06408	5.32	0.75583	5.32	2.59286	5.32	0.80374	5.32	86.7021	5.32	45.2815	5.32
0.56853	5.57	0.06408	5.57	0.75583	5.57	2.59305	5.57	0.80378	5.57	86.7046	5.57	45.283	5.57
0.56905	5.23	0.06408	5.23	0.75584	5.23	2.59307	5.23	0.80386	5.23	86.7055	5.23	45.3186	5.23
0.5698	6.06	0.0641	6.06	0.75586	6.06	2.59402	6.06	0.80387	6.06	86.7726	6.06	45.3682	6.06
0.5698	5.18	0.06412	5.18	0.75586	5.18	2.59454	5.18	0.8039	5.18	86.7743	5.18	45.4204	5.18
0.57	5.32	0.06414	5.32	0.75586	5.32	2.59485	5.32	0.80399	5.32	86.8249	5.32	45.4817	5.32
0.57034	5.94	0.06414	5.94	0.7559	5.94	2.59527	5.94	0.80407	5.94	86.8295	5.94	45.504	5.94
0.57034	5.31	0.06415	5.31	0.75591	5.31	2.5965	5.31	0.80407	5.31	86.8484	5.31	45.551	5.31
0.57138	5.59	0.06416	5.59	0.75592	5.59	2.59661	5.59	0.80407	5.59	86.8533	5.59	45.5539	5.59
0.57153	5.29	0.06416	5.29	0.75602	5.29	2.59701	5.29	0.80408	5.29	86.8831	5.29	45.5573	5.29
0.5719	5.58	0.06416	5.58	0.75611	5.58	2.59723	5.58	0.80411	5.58	86.917	5.58	45.6309	5.58
0.57218	5.39	0.06417	5.39	0.75613	5.39	2.59766	5.39	0.80413	5.39	86.9233	5.39	45.653	5.39
0.57313	5.7	0.06418	5.7	0.75613	5.7	2.59817	5.7	0.80413	5.7	86.925	5.7	45.6864	5.7
0.57345	5.75	0.06421	5.75	0.75619	5.75	2.59881	5.75	0.80415	5.75	86.931	5.75	45.6931	5.75
0.57424	5.47	0.06422	5.47	0.75622	5.47	2.59892	5.47	0.80417	5.47	86.937	5.47	45.6969	5.47
0.5745	5.39	0.06422	5.39	0.75624	5.39	2.59896	5.39	0.80422	5.39	86.9592	5.39	45.7007	5.39
0.57465	5.54	0.06423	5.54	0.75631	5.54	2.59906	5.54	0.80425	5.54	86.9608	5.54	45.7144	5.54
0.57469	5.66	0.06424	5.66	0.75634	5.66	2.59939	5.66	0.80426	5.66	86.9742	5.66	45.7238	5.66
0.57476	5.49	0.06424	5.49	0.75635	5.49	2.60005	5.49	0.80433	5.49	86.9819	5.49	45.7439	5.49
0.57486	5.47	0.06424	5.47	0.75647	5.47	2.60135	5.47	0.80437	5.47	86.9834	5.47	45.7976	5.47
0.57534	5.39	0.06425	5.39	0.75651	5.39	2.60154	5.39	0.80437	5.39	86.9977	5.39	45.8032	5.39
0.57545	5.65	0.06425	5.65	0.75675	5.65	2.60156	5.65	0.80438	5.65	87.0074	5.65	45.8165	5.65
0.57547	5.59	0.06425	5.59	0.7568	5.59	2.60169	5.59	0.80443	5.59	87.0376	5.59	45.8166	5.59
0.5756	5.61	0.06426	5.61	0.75682	5.61	2.60212	5.61	0.80447	5.61	87.0671	5.61	45.833	5.61
0.57596	5.1	0.06426	5.1	0.75688	5.1	2.60271	5.1	0.8045	5.1	87.0722	5.1	45.8671	5.1
0.57612	5.55	0.06426	5.55	0.75695	5.55	2.60305	5.55	0.80454	5.55	87.111	5.55	45.8877	5.55
0.57649	5.53	0.06428	5.53	0.75698	5.53	2.60318	5.53	0.80457	5.53	87.1549	5.53	45.8931	5.53
0.57717	5.35	0.06428	5.35	0.75698	5.35	2.60325	5.35	0.80458	5.35	87.1669	5.35	45.8989	5.35
0.57729	5.59	0.06428	5.59	0.757	5.59	2.60388	5.59	0.80459	5.59	87.1706	5.59	45.9162	5.59
0.57735	6.06	0.06429	6.06	0.757	6.06	2.60398	6.06	0.80463	6.06	87.1851	6.06	45.9218	6.06
0.57775	5.63	0.06431	5.63	0.75705	5.63	2.60411	5.63	0.80469	5.63	87.1913	5.63	45.9374	5.63
0.57776	5.42	0.06431	5.42	0.75705	5.42	2.60427	5.42	0.80474	5.42	87.206	5.42	45.9444	5.42
0.57778	5.77	0.06431	5.77	0.75708	5.77	2.60449	5.77	0.80475	5.77	87.2769	5.77	45.958	5.77
0.5778	5.29	0.06431	5.29	0.7571	5.29	2.60492	5.29	0.80477	5.29	87.3477	5.29	45.9658	5.29
0.57815	5.51	0.06431	5.51	0.75713	5.51	2.60567	5.51	0.80478	5.51	87.354	5.51	45.993	5.51
0.57828	5.73	0.06433	5.73	0.75715	5.73	2.60572	5.73	0.80487	5.73	87.3579	5.73	46.008	5.73
0.5783	5.77	0.06434	5.77	0.75717	5.77	2.60573	5.77	0.80488	5.77	87.3632	5.77	46.0553	5.77
0.5784	5.67	0.06435	5.67	0.75721	5.67	2.60586	5.67	0.80492	5.67	87.3659	5.67	46.08	5.67
0.5785	5.43	0.06435	5.43	0.75729	5.43	2.6061	5.43	0.80492	5.43	87.3663	5.43	46.0874	5.43
0.57854	5.5	0.06436	5.5	0.75729	5.5	2.6062	5.5	0.80511	5.5	87.3728	5.5	46.1075	5.5
0.57875	5.3	0.06436	5.3	0.75729	5.3	2.60637	5.3	0.80513	5.3	87.3913	5.3	46.1177	5.3
0.5788	5.68	0.06437	5.68	0.75732	5.68	2.60704	5.68	0.80524	5.68	87.409	5.68	46.1409	5.68
0.57893	5.43	0.06438	5.43	0.75734	5.43	2.60711	5.43	0.80528	5.43	87.4301	5.43	46.1422	5.43
0.57937	5.5	0.06438	5.5	0.75735	5.5	2.60744	5.5	0.80533	5.5	87.4557	5.5	46.1478	5.5
0.57942	5.06	0.06439	5.06	0.75742	5.06	2.60776	5.06	0.80536	5.06	87.4634	5.06	46.1749	5.06
0.57953	5.87	0.06439	5.87	0.75749	5.87	2.60788	5.87	0.80536	5.87	87.5317	5.87	46.2621	5.87
0.58021	5.22	0.0644	5.22	0.75753	5.22	2.60876	5.22	0.80539	5.22	87.5387	5.22	46.2641	5.22
0.58053	5.45	0.0644	5.45	0.75755	5.45	2.60905	5.45	0.80546	5.45	87.5437	5.45	46.2883	5.45
0.58104	5.76	0.06442	5.76	0.75755	5.76	2.60921	5.76	0.80551	5.76	87.5546	5.76	46.2975	5.76
0.58116	5.7	0.06443	5.7	0.75756	5.7	2.60944	5.7	0.80558	5.7	87.5742	5.7	46.3263	5.7
0.58135	5.51	0.06443	5.51	0.75761	5.51	2.60981	5.51	0.8056	5.51	87.575	5.51	46.3469	5.51
0.58153	5.26	0.06443	5.26	0.75764	5.26	2.60985	5.26	0.80565	5.26	87.5867	5.26	46.3523	5.26
0.58155	5.48	0.06443	5.48	0.75764	5.48	2.61003	5.48	0.80569	5.48	87.6217	5.48	46.3558	5.48
0.58171	5.97	0.06443	5.97	0.7577	5.97	2.61014	5.97	0.80571	5.97	87.6384	5.97	46.3684	5.97
0.5827	5.16	0.06446	5.16	0.75771	5.16	2.61016	5.16	0.80571	5.16	87.6579	5.16	46.4147	5.16
0.58291	5.77	0.06447	5.77	0.75772	5.77	2.61027	5.77	0.80571	5.77	87.6779	5.77	46.4825	5.77
0.5833	5.55	0.06448	5.55	0.75779	5.55	2.61079	5.55	0.80575	5.55	87.694	5.55	46.4899	5.55
0.5839	5.24	0.06448	5.24	0.7578	5.24	2.61081	5.24	0.80591	5.24	87.7506	5.24	46.5106	5.24
0.58403	5.3	0.06449	5.3	0.75792	5.3	2.61087	5.3	0.80593	5.3	87.7507	5.3	46.5145	5.3
0.58408	5.77	0.06449	5.77	0.75798	5.77	2.61103	5.77	0.80597	5.77	87.7593	5.77	46.5253	5.77
0.58521	5.32	0.06449	5.32	0.75801	5.32	2.61199	5.32	0.80597	5.32	87.7624	5.32	46.5375	5.32
0.58581	5.32	0.06451	5.32	0.75802	5.32	2.61209	5.32	0.806	5.32	87.7819	5.32	46.5413	5.32
0.58588	5.87	0.06451	5.87	0.75803	5.87	2.61209	5.87	0.80602	5.87	87.7953	5.87	46.5596	5.87
0.58592	5.47	0.06452	5.47	0.75805	5.47	2.61216	5.47	0.80605	5.47	87.8067	5.47	46.6011	5.47
0.58638	5.39	0.06452	5.39	0.75809	5.39	2.61265	5.39	0.80612	5.39	87.8153	5.39	46.6085	5.39
0.58643	5.28	0.06452	5.28	0.75814	5.28	2.61331	5.28	0.80626	5.28	87.8312	5.28	46.6206	5.28
0.58717	5.68	0.06452	5.68	0.75815	5.68	2.61385	5.68	0.80628	5.68	87.8903	5.68	46.6251	5.68
0.58719	5.57	0.06454	5.57	0.75815	5.57	2.61409	5.57	0.80631	5.57	87.9112	5.57	46.6339	5.57
0.58727	5.67	0.06454	5.67	0.75816	5.67	2.61422	5.67	0.80633	5.67	87.9238	5.67	46.6409	5.67
0.58741	5.43	0.06454	5.43	0.75818	5.43	2.61433	5.43	0.80634	5.43	87.9255	5.43	46.6772	5.43
0.58745	5.43	0.06454	5.43	0.75819	5.43	2.61454	5.43	0.8064	5.43	87.9366	5.43	46.6903	5.43
0.58782	5.54	0.06454	5.54	0.75822	5.54	2.61491	5.54	0.8064	5.54	87.9482	5.54	46.7059	5.54
0.58801	5.62	0.06455	5.62	0.75823	5.62	2.61562	5.62	0.8064	5.62	87.9526	5.62	46.7191	5.62
0.58804	5.64	0.06455	5.64	0.75826	5.64	2.61621	5.64	0.80642	5.64	87.9667	5.64	46.7213	5.64
0.58805	5.21	0.06456	5.21	0.7583	5.21	2.61621	5.21	0.80648	5.21	87.969	5.21	46.7838	5.21
0.58824	5.37	0.06457	5.37	0.75832	5.37	2.61637	5.37	0.80652	5.37	87.9905	5.37	46.7868	5.37
0.58844	5.52	0.06458	5.52	0.75834	5.52	2.61652	5.52	0.80654	5.52	88.0007	5.52	46.7974	5.52
0.58893	5.88	0.06458	5.88	0.75835	5.88	2.6167	5.88	0.80657	5.88	88.0469	5.88	46.7995	5.88
0.58932	5.72	0.06459	5.72	0.75836	5.72	2.61676	5.72	0.80659	5.72	88.0936	5.72	46.8132	5.72
0.58938	5.5	0.06459	5.5	0.75838	5.5	2.61692	5.5	0.80665	5.5	88.1045	5.5	46.8723	5.5
0.58944	5.7	0.0646	5.7	0.75838	5.7	2.61702	5.7	0.80666	5.7	88.1533	5.7	46.9568	5.7
0.58956	5.66	0.06461	5.66	0.75839	5.66	2.61731	5.66	0.8067	5.66	88.1635	5.66	46.957	5.66
0.58959	5.32	0.06463	5.32	0.75844	5.32	2.6176	5.32	0.8067	5.32	88.187	5.32	46.9702	5.32
0.58993	5.64	0.06463	5.64	0.75844	5.64	2.61786	5.64	0.80677	5.64	88.1872	5.64	46.9725	5.64
0.59041	5.34	0.06463	5.34	0.75845	5.34	2.61826	5.34	0.80691	5.34	88.2012	5.34	46.9862	5.34
0.59056	5.12	0.06463	5.12	0.75845	5.12	2.61866	5.12	0.80691	5.12	88.2248	5.12	46.9933	5.12
0.59078	5.71	0.06463	5.71	0.75846	5.71	2.61883	5.71	0.80694	5.71	88.2759	5.71	47.0405	5.71
0.59114	5.8	0.06464	5.8	0.75856	5.8	2.61946	5.8	0.80708	5.8	88.2839	5.8	47.0526	5.8
0.59152	5.42	0.06464	5.42	0.75857	5.42	2.61987	5.42	0.80711	5.42	88.2894	5.42	47.056	5.42
0.59198	5.42	0.06465	5.42	0.75857	5.42	2.61989	5.42	0.80714	5.42	88.3058	5.42	47.0565	5.42
0.59227	5.47	0.06465	5.47	0.75857	5.47	2.61993	5.47	0.8072	5.47	88.3216	5.47	47.0588	5.47
0.59318	5.76	0.06466	5.76	0.75857	5.76	2.62026	5.76	0.80721	5.76	88.3478	5.76	47.0636	5.76
0.59325	5.62	0.06466	5.62	0.75861	5.62	2.62037	5.62	0.80725	5.62	88.3563	5.62	47.0677	5.62
0.59327	5.71	0.06466	5.71	0.75865	5.71	2.62061	5.71	0.80726	5.71	88.3891	5.71	47.0946	5.71
0.59362	5.69	0.06467	5.69	0.75872	5.69	2.62082	5.69	0.80741	5.69	88.4357	5.69	47.1112	5.69
0.59363	5.54	0.06468	5.54	0.75873	5.54	2.62102	5.54	0.80741	5.54	88.4451	5.54	47.1142	5.54
0.59364	5.46	0.06468	5.46	0.75875	5.46	2.62106	5.46	0.80748	5.46	88.4532	5.46	47.1491	5.46
0.59403	5.82	0.06471	5.82	0.7588	5.82	2.62108	5.82	0.80753	5.82	88.4635	5.82	47.1586	5.82
0.59418	5.13	0.06471	5.13	0.75882	5.13	2.6218	5.13	0.80753	5.13	88.5168	5.13	47.1924	5.13
0.5947	5.67	0.06471	5.67	0.75885	5.67	2.6225	5.67	0.80753	5.67	88.5273	5.67	47.2199	5.67
0.59491	5.53	0.06472	5.53	0.75887	5.53	2.62255	5.53	0.80755	5.53	88.5571	5.53	47.2352	5.53
0.59504	5.65	0.06472	5.65	0.75889	5.65	2.62303	5.65	0.80757	5.65	88.573	5.65	47.2367	5.65
0.5951	5.25	0.06472	5.25	0.75891	5.25	2.62318	5.25	0.80759	5.25	88.5841	5.25	47.25	5.25
0.5953	5.67	0.06473	5.67	0.75891	5.67	2.62323	5.67	0.8076	5.67	88.625	5.67	47.263	5.67
0.59557	5.25	0.06474	5.25	0.75892	5.25	2.62395	5.25	0.80766	5.25	88.6461	5.25	47.2936	5.25
0.59565	5.46	0.06475	5.46	0.75894	5.46	2.62411	5.46	0.80767	5.46	88.6518	5.46	47.3197	5.46
0.59577	5.49	0.06476	5.49	0.75894	5.49	2.62421	5.49	0.80774	5.49	88.6605	5.49	47.3724	5.49
0.59684	5.03	0.06476	5.03	0.75896	5.03	2.62453	5.03	0.80783	5.03	88.6756	5.03	47.3894	5.03
0.59687	5.38	0.06476	5.38	0.75896	5.38	2.62457	5.38	0.80785	5.38	88.6859	5.38	47.3894	5.38
0.59712	5.32	0.06477	5.32	0.75896	5.32	2.62467	5.32	0.80785	5.32	88.6892	5.32	47.3987	5.32
0.59717	5.28	0.06478	5.28	0.75897	5.28	2.62495	5.28	0.80792	5.28	88.7769	5.28	47.4052	5.28
0.59728	5.55	0.06479	5.55	0.75902	5.55	2.6255	5.55	0.80794	5.55	88.7773	5.55	47.4377	5.55
0.59762	5.7	0.0648	5.7	0.75903	5.7	2.62578	5.7	0.80798	5.7	88.7924	5.7	47.4481	5.7
0.59805	5.5	0.06481	5.5	0.75903	5.5	2.62593	5.5	0.80801	5.5	88.8364	5.5	47.4543	5.5
0.59806	5.79	0.06484	5.79	0.75904	5.79	2.62605	5.79	0.80801	5.79	88.8742	5.79	47.4645	5.79
0.59828	5.59	0.06484	5.59	0.75906	5.59	2.62621	5.59	0.80803	5.59	88.8952	5.59	47.4808	5.59
0.59839	5.53	0.06485	5.53	0.75908	5.53	2.62644	5.53	0.80807	5.53	88.9187	5.53	47.5198	5.53
0.5985	5.43	0.06486	5.43	0.7591	5.43	2.6265	5.43	0.80809	5.43	88.9218	5.43	47.5384	5.43
0.59859	5.31	0.06486	5.31	0.75911	5.31	2.62653	5.31	0.80824	5.31	88.9404	5.31	47.5647	5.31
0.59869	5.38	0.06487	5.38	0.75912	5.38	2.62675	5.38	0.80829	5.38	88.9553	5.38	47.5791	5.38
0.59915	5.6	0.06489	5.6	0.75915	5.6	2.62677	5.6	0.80836	5.6	88.9834	5.6	47.6111	5.6
0.59927	5.39	0.06489	5.39	0.75916	5.39	2.6272	5.39	0.80841	5.39	89.0048	5.39	47.6254	5.39
0.59939	5.54	0.06489	5.54	0.75918	5.54	2.62721	5.54	0.80844	5.54	89.01	5.54	47.6374	5.54
0.60008	5.54	0.06489	5.54	0.75919	5.54	2.62728	5.54	0.80846	5.54	89.0108	5.54	47.6677	5.54
0.6001	5.17	0.06489	5.17	0.7592	5.17	2.62763	5.17	0.80847	5.17	89.025	5.17	47.6798	5.17
0.60012	5.63	0.06491	5.63	0.75921	5.63	2.62772	5.63	0.8085	5.63	89.0303	5.63	47.6838	5.63
0.60018	5.48	0.06492	5.48	0.75923	5.48	2.6278	5.48	0.80857	5.48	89.0311	5.48	47.7116	5.48
0.60033	5.24	0.06493	5.24	0.75924	5.24	2.62783	5.24	0.80857	5.24	89.055	5.24	47.7278	5.24
0.60035	5.49	0.06493	5.49	0.75925	5.49	2.62791	5.49	0.80864	5.49	89.0849	5.49	47.7354	5.49
0.60112	5.06	0.06493	5.06	0.75925	5.06	2.62794	5.06	0.80866	5.06	89.1646	5.06	47.8001	5.06
0.60136	5.26	0.06494	5.26	0.75925	5.26	2.62819	5.26	0.80869	5.26	89.2119	5.26	47.8194	5.26
0.60162	5.43	0.06495	5.43	0.75927	5.43	2.62879	5.43	0.8087	5.43	89.2239	5.43	47.8288	5.43
0.60169	5.47	0.06496	5.47	0.75928	5.47	2.62888	5.47	0.80872	5.47	89.2305	5.47	47.843	5.47
0.6021	5.7	0.06496	5.7	0.75931	5.7	2.62935	5.7	0.80876	5.7	89.2513	5.7	47.8521	5.7
0.60223	5.44	0.06497	5.44	0.75938	5.44	2.62954	5.44	0.80876	5.44	89.2906	5.44	47.862	5.44
0.60292	5.64	0.06498	5.64	0.7594	5.64	2.62965	5.64	0.80877	5.64	89.3143	5.64	47.8831	5.64
0.60324	5.03	0.06499	5.03	0.75941	5.03	2.63002	5.03	0.80892	5.03	89.3226	5.03	47.885	5.03
0.60344	5.72	0.06499	5.72	0.75944	5.72	2.63006	5.72	0.80893	5.72	89.3586	5.72	47.8968	5.72
0.6037	5.34	0.06501	5.34	0.75944	5.34	2.63028	5.34	0.80898	5.34	89.3722	5.34	47.9018	5.34
0.60386	5.76	0.06501	5.76	0.75945	5.76	2.63053	5.76	0.80902	5.76	89.3742	5.76	47.9097	5.76
0.60402	5.99	0.06502	5.99	0.75946	5.99	2.63082	5.99	0.80902	5.99	89.3779	5.99	47.9109	5.99
0.60424	5.62	0.06502	5.62	0.7595	5.62	2.63105	5.62	0.80903	5.62	89.3933	5.62	47.9232	5.62
0.60463	5.42	0.06504	5.42	0.7595	5.42	2.63138	5.42	0.80904	5.42	89.4219	5.42	47.9406	5.42
0.6047	5.32	0.06505	5.32	0.7595	5.32	2.63141	5.32	0.80905	5.32	89.4311	5.32	47.9651	5.32
0.60497	5.66	0.06506	5.66	0.75951	5.66	2.63143	5.66	0.80915	5.66	89.4578	5.66	47.9866	5.66
0.6052	6.01	0.06507	6.01	0.75952	6.01	2.63144	6.01	0.80926	6.01	89.4691	6.01	48.0007	6.01
0.60524	5.02	0.06508	5.02	0.75955	5.02	2.63176	5.02	0.80932	5.02	89.4818	5.02	48.0227	5.02
0.60569	5.54	0.06508	5.54	0.75961	5.54	2.63183	5.54	0.8094	5.54	89.5369	5.54	48.0288	5.54
0.60583	5.36	0.06508	5.36	0.75962	5.36	2.63238	5.36	0.8094	5.36	89.5424	5.36	48.0398	5.36
0.6062	5.33	0.06508	5.33	0.75962	5.33	2.63253	5.33	0.80945	5.33	89.5473	5.33	48.0899	5.33
0.60664	5.72	0.06509	5.72	0.75964	5.72	2.63262	5.72	0.80949	5.72	89.5485	5.72	48.1054	5.72
0.6069	5.58	0.06511	5.58	0.75968	5.58	2.63277	5.58	0.80949	5.58	89.5671	5.58	48.1189	5.58
0.60709	5.36	0.06512	5.36	0.75971	5.36	2.63295	5.36	0.8095	5.36	89.5734	5.36	48.1278	5.36
0.60713	5.55	0.06514	5.55	0.75971	5.55	2.6333	5.55	0.80951	5.55	89.6009	5.55	48.1439	5.55
0.60728	5.49	0.06516	5.49	0.75971	5.49	2.63348	5.49	0.80951	5.49	89.6105	5.49	48.1765	5.49
0.60755	5.48	0.06516	5.48	0.75972	5.48	2.63358	5.48	0.80954	5.48	89.6137	5.48	48.1791	5.48
0.60804	5.17	0.06517	5.17	0.75974	5.17	2.63373	5.17	0.80958	5.17	89.6211	5.17	48.2162	5.17
0.60821	5.43	0.06517	5.43	0.75975	5.43	2.63391	5.43	0.80967	5.43	89.6331	5.43	48.221	5.43
0.60849	5.42	0.06519	5.42	0.75975	5.42	2.63415	5.42	0.80969	5.42	89.6524	5.42	48.2534	5.42
0.60888	5.31	0.0652	5.31	0.75976	5.31	2.63423	5.31	0.80981	5.31	89.6867	5.31	48.2581	5.31
0.60903	5.36	0.06521	5.36	0.75977	5.36	2.63429	5.36	0.80981	5.36	89.7113	5.36	48.2591	5.36
0.60931	5.53	0.06522	5.53	0.75977	5.53	2.6348	5.53	0.80989	5.53	89.7115	5.53	48.297	5.53
0.60951	5.8	0.06522	5.8	0.75978	5.8	2.63513	5.8	0.80997	5.8	89.751	5.8	48.3168	5.8
0.61008	5.41	0.06522	5.41	0.75978	5.41	2.63586	5.41	0.81003	5.41	89.7514	5.41	48.3181	5.41
0.61012	5.73	0.06526	5.73	0.75978	5.73	2.63591	5.73	0.81005	5.73	89.7726	5.73	48.3451	5.73
0.61069	5.54	0.06527	5.54	0.75981	5.54	2.63613	5.54	0.81011	5.54	89.7811	5.54	48.3572	5.54
0.6107	5.74	0.06527	5.74	0.75982	5.74	2.6368	5.74	0.81011	5.74	89.7863	5.74	48.4061	5.74
0.6108	5.55	0.06528	5.55	0.75982	5.55	2.63734	5.55	0.81011	5.55	89.8548	5.55	48.4232	5.55
0.61087	5.47	0.06531	5.47	0.75983	5.47	2.6374	5.47	0.81012	5.47	89.8715	5.47	48.4352	5.47
0.61103	5.47	0.06532	5.47	0.75983	5.47	2.63758	5.47	0.81014	5.47	89.884	5.47	48.4563	5.47
0.6111	5.84	0.06533	5.84	0.75984	5.84	2.63761	5.84	0.81015	5.84	89.9027	5.84	48.4704	5.84
0.61141	5.53	0.06533	5.53	0.75985	5.53	2.63771	5.53	0.81015	5.53	89.942	5.53	48.4874	5.53
0.61256	5.38	0.06535	5.38	0.75987	5.38	2.63791	5.38	0.81018	5.38	89.9651	5.38	48.5023	5.38
0.61269	5.52	0.06535	5.52	0.75988	5.52	2.63816	5.52	0.8102	5.52	89.9823	5.52	48.5252	5.52
0.61279	5.05	0.06535	5.05	0.75988	5.05	2.63828	5.05	0.81021	5.05	89.9922	5.05	48.5335	5.05
0.61283	5.28	0.06535	5.28	0.75991	5.28	2.63835	5.28	0.81022	5.28	90.0112	5.28	48.5468	5.28
0.61358	5.37	0.06536	5.37	0.75993	5.37	2.63861	5.37	0.81023	5.37	90.0362	5.37	48.5489	5.37
0.61366	5.48	0.06536	5.48	0.75996	5.48	2.63881	5.48	0.81027	5.48	90.0697	5.48	48.5544	5.48
0.61374	5.65	0.06537	5.65	0.75999	5.65	2.63932	5.65	0.81028	5.65	90.0768	5.65	48.5552	5.65
0.61443	5.43	0.06539	5.43	0.75999	5.43	2.63953	5.43	0.81028	5.43	90.0822	5.43	48.5578	5.43
0.61456	5.49	0.0654	5.49	0.76	5.49	2.63964	5.49	0.8103	5.49	90.0829	5.49	48.5847	5.49
0.61484	5.31	0.0654	5.31	0.76001	5.31	2.63981	5.31	0.81033	5.31	90.1651	5.31	48.6016	5.31
0.61489	5.47	0.06541	5.47	0.76002	5.47	2.6399	5.47	0.81035	5.47	90.2072	5.47	48.6042	5.47
0.61509	5.72	0.06542	5.72	0.76003	5.72	2.63999	5.72	0.81037	5.72	90.2133	5.72	48.6315	5.72
0.61543	5.33	0.06543	5.33	0.76003	5.33	2.64006	5.33	0.81037	5.33	90.2156	5.33	48.6483	5.33
0.61583	5.67	0.06543	5.67	0.76004	5.67	2.64009	5.67	0.81038	5.67	90.2493	5.67	48.7135	5.67
0.61606	5.45	0.06544	5.45	0.76005	5.45	2.64029	5.45	0.81038	5.45	90.2629	5.45	48.72	5.45
0.61631	5.5	0.06544	5.5	0.76007	5.5	2.64073	5.5	0.81042	5.5	90.2662	5.5	48.7211	5.5
0.6165	5.36	0.06545	5.36	0.76007	5.36	2.64091	5.36	0.81052	5.36	90.3179	5.36	48.7504	5.36
0.61677	5.34	0.06545	5.34	0.76007	5.34	2.64117	5.34	0.81058	5.34	90.3359	5.34	48.7621	5.34
0.61731	5.19	0.06546	5.19	0.76009	5.19	2.64147	5.19	0.81058	5.19	90.3444	5.19	48.7688	5.19
0.61755	5.09	0.06546	5.09	0.76011	5.09	2.64163	5.09	0.8106	5.09	90.349	5.09	48.7791	5.09
0.61762	5.53	0.06547	5.53	0.76012	5.53	2.64172	5.53	0.81062	5.53	90.3793	5.53	48.788	5.53
0.6178	5.59	0.06548	5.59	0.76013	5.59	2.64178	5.59	0.81063	5.59	90.3849	5.59	48.8237	5.59
0.61796	5.44	0.06548	5.44	0.76015	5.44	2.64198	5.44	0.81067	5.44	90.395	5.44	48.8635	5.44
0.61819	5.73	0.06548	5.73	0.76016	5.73	2.64217	5.73	0.81068	5.73	90.4059	5.73	48.8707	5.73
0.61837	5.57	0.06548	5.57	0.76018	5.57	2.6424	5.57	0.8107	5.57	90.4284	5.57	48.8724	5.57
0.61871	5.56	0.06548	5.56	0.76019	5.56	2.64246	5.56	0.81071	5.56	90.4372	5.56	48.8976	5.56
0.61916	5.72	0.06549	5.72	0.76022	5.72	2.64249	5.72	0.81074	5.72	90.4731	5.72	48.8987	5.72
0.61917	5.59	0.0655	5.59	0.76026	5.59	2.64313	5.59	0.81083	5.59	90.5	5.59	48.9009	5.59
0.61924	5.4	0.06551	5.4	0.76027	5.4	2.64399	5.4	0.81089	5.4	90.5185	5.4	48.9222	5.4
0.61979	5.49	0.06552	5.49	0.76028	5.49	2.644	5.49	0.8109	5.49	90.5287	5.49	48.9325	5.49
0.61998	5.51	0.06556	5.51	0.76029	5.51	2.64408	5.51	0.81094	5.51	90.5474	5.51	48.9367	5.51
0.62022	5.53	0.06557	5.53	0.76031	5.53	2.64419	5.53	0.81101	5.53	90.5719	5.53	48.9658	5.53
0.62022	5.2	0.06558	5.2	0.76031	5.2	2.64474	5.2	0.81102	5.2	90.6497	5.2	48.9676	5.2
0.62023	5.18	0.06558	5.18	0.76035	5.18	2.64481	5.18	0.81103	5.18	90.664	5.18	48.9684	5.18
0.6204	5.46	0.06559	5.46	0.76037	5.46	2.64491	5.46	0.81104	5.46	90.6911	5.46	48.9767	5.46
0.62042	5.37	0.06559	5.37	0.76038	5.37	2.64504	5.37	0.81104	5.37	90.7259	5.37	49.0084	5.37
0.62046	5.66	0.0656	5.66	0.76038	5.66	2.64509	5.66	0.81106	5.66	90.7336	5.66	49.0342	5.66
0.62061	5.25	0.06562	5.25	0.7604	5.25	2.64524	5.25	0.81112	5.25	90.7523	5.25	49.0374	5.25
0.62067	5.3	0.06562	5.3	0.76041	5.3	2.64558	5.3	0.81117	5.3	90.7537	5.3	49.0397	5.3
0.6209	5.62	0.06564	5.62	0.76043	5.62	2.64586	5.62	0.81118	5.62	90.778	5.62	49.042	5.62
0.62154	5.12	0.06564	5.12	0.76044	5.12	2.64594	5.12	0.81123	5.12	90.8065	5.12	49.0559	5.12
0.62168	5.44	0.06565	5.44	0.76044	5.44	2.64599	5.44	0.81136	5.44	90.8158	5.44	49.0896	5.44
0.62191	5.6	0.06565	5.6	0.76045	5.6	2.64604	5.6	0.81142	5.6	90.8513	5.6	49.1125	5.6
0.62207	5.49	0.06565	5.49	0.76047	5.49	2.64631	5.49	0.81143	5.49	90.8594	5.49	49.1518	5.49
0.62264	5.56	0.06566	5.56	0.76047	5.56	2.64636	5.56	0.81143	5.56	90.8673	5.56	49.1562	5.56
0.62272	5.55	0.06566	5.55	0.7605	5.55	2.64638	5.55	0.81146	5.55	90.8969	5.55	49.183	5.55
0.62297	5.17	0.06566	5.17	0.76051	5.17	2.64644	5.17	0.8115	5.17	90.9132	5.17	49.1925	5.17
0.62318	5.5	0.06566	5.5	0.76051	5.5	2.64653	5.5	0.81152	5.5	90.9714	5.5	49.1989	5.5
0.62347	5.26	0.06567	5.26	0.76054	5.26	2.64674	5.26	0.81153	5.26	90.9726	5.26	49.2071	5.26
0.62377	5.47	0.06567	5.47	0.76054	5.47	2.6468	5.47	0.81153	5.47	90.9785	5.47	49.2089	5.47
0.62408	5.28	0.06569	5.28	0.76054	5.28	2.64681	5.28	0.81153	5.28	90.9998	5.28	49.2286	5.28
0.62452	5.53	0.06569	5.53	0.76055	5.53	2.64733	5.53	0.81154	5.53	91.0481	5.53	49.3026	5.53
0.62455	5.16	0.06571	5.16	0.76058	5.16	2.64758	5.16	0.81155	5.16	91.0547	5.16	49.3061	5.16
0.62461	5.28	0.06571	5.28	0.76061	5.28	2.64769	5.28	0.81159	5.28	91.0576	5.28	49.3203	5.28
0.62513	5.58	0.06572	5.58	0.76062	5.58	2.64796	5.58	0.81161	5.58	91.0934	5.58	49.3255	5.58
0.62565	5.48	0.06575	5.48	0.76064	5.48	2.64833	5.48	0.81162	5.48	91.0968	5.48	49.3265	5.48
0.62569	5.9	0.06576	5.9	0.76064	5.9	2.64862	5.9	0.81162	5.9	91.1223	5.9	49.3356	5.9
0.62582	5.49	0.06576	5.49	0.76064	5.49	2.64876	5.49	0.81168	5.49	91.1663	5.49	49.3521	5.49
0.62626	5.62	0.06577	5.62	0.76065	5.62	2.64915	5.62	0.81173	5.62	91.1874	5.62	49.3794	5.62
0.62646	5.35	0.06577	5.35	0.76066	5.35	2.64917	5.35	0.81175	5.35	91.1989	5.35	49.3909	5.35
0.62692	5.42	0.06577	5.42	0.76066	5.42	2.64925	5.42	0.81178	5.42	91.2113	5.42	49.3973	5.42
0.62716	5.3	0.0658	5.3	0.76067	5.3	2.64948	5.3	0.81179	5.3	91.2169	5.3	49.4014	5.3
0.6272	5.48	0.0658	5.48	0.76067	5.48	2.64951	5.48	0.81181	5.48	91.233	5.48	49.4036	5.48
0.62724	5.29	0.0658	5.29	0.76068	5.29	2.64978	5.29	0.81182	5.29	91.278	5.29	49.4211	5.29
0.62732	5.21	0.0658	5.21	0.76071	5.21	2.64984	5.21	0.81186	5.21	91.2791	5.21	49.4375	5.21
0.6274	5.54	0.06581	5.54	0.76071	5.54	2.6501	5.54	0.81187	5.54	91.2982	5.54	49.4441	5.54
0.62859	5.31	0.06583	5.31	0.76073	5.31	2.65021	5.31	0.81188	5.31	91.3149	5.31	49.4901	5.31
0.62868	5.52	0.06584	5.52	0.76074	5.52	2.65023	5.52	0.81193	5.52	91.3205	5.52	49.4972	5.52
0.6293	5.86	0.06589	5.86	0.76075	5.86	2.65071	5.86	0.81193	5.86	91.3262	5.86	49.5059	5.86
0.62964	5.49	0.06589	5.49	0.76076	5.49	2.65089	5.49	0.81194	5.49	91.3271	5.49	49.5082	5.49
0.62964	5.65	0.06589	5.65	0.76076	5.65	2.65149	5.65	0.81194	5.65	91.3297	5.65	49.5182	5.65
0.63099	5.56	0.06589	5.56	0.76076	5.56	2.652	5.56	0.81196	5.56	91.3928	5.56	49.5227	5.56
0.63112	5.72	0.06591	5.72	0.76079	5.72	2.65226	5.72	0.81197	5.72	91.4049	5.72	49.5237	5.72
0.6313	5.43	0.06591	5.43	0.76079	5.43	2.65247	5.43	0.81199	5.43	91.4164	5.43	49.5463	5.43
0.63138	5.52	0.06593	5.52	0.76079	5.52	2.65268	5.52	0.81203	5.52	91.4267	5.52	49.5589	5.52
0.63152	5.45	0.06593	5.45	0.7608	5.45	2.65268	5.45	0.81204	5.45	91.4463	5.45	49.5702	5.45
0.63153	5.44	0.06594	5.44	0.76081	5.44	2.65283	5.44	0.81204	5.44	91.4558	5.44	49.5716	5.44
0.63164	5.53	0.06594	5.53	0.76081	5.53	2.65296	5.53	0.8121	5.53	91.4621	5.53	49.5974	5.53
0.6326	5.36	0.06594	5.36	0.76082	5.36	2.65304	5.36	0.81215	5.36	91.4815	5.36	49.5984	5.36
0.63283	5.84	0.06595	5.84	0.76084	5.84	2.65306	5.84	0.81223	5.84	91.5008	5.84	49.6138	5.84
0.63291	5.31	0.06595	5.31	0.76085	5.31	2.65343	5.31	0.81233	5.31	91.566	5.31	49.6158	5.31
0.63345	5.41	0.06596	5.41	0.76088	5.41	2.65349	5.41	0.81233	5.41	91.5747	5.41	49.6404	5.41
0.63366	5.48	0.066	5.48	0.76088	5.48	2.65356	5.48	0.81236	5.48	91.5903	5.48	49.7089	5.48
0.63373	5.58	0.066	5.58	0.76095	5.58	2.65359	5.58	0.81238	5.58	91.6106	5.58	49.7427	5.58
0.63383	5.69	0.06603	5.69	0.76095	5.69	2.65362	5.69	0.81244	5.69	91.6162	5.69	49.7589	5.69
0.63414	5.37	0.06604	5.37	0.76096	5.37	2.65368	5.37	0.81249	5.37	91.6212	5.37	49.78	5.37
0.63458	5.29	0.06604	5.29	0.76096	5.29	2.65375	5.29	0.81269	5.29	91.707	5.29	49.7826	5.29
0.63477	5.62	0.06604	5.62	0.76097	5.62	2.65406	5.62	0.81279	5.62	91.7242	5.62	49.7865	5.62
0.63508	5.2	0.06605	5.2	0.761	5.2	2.65409	5.2	0.81284	5.2	91.7277	5.2	49.8028	5.2
0.63538	5.3	0.06606	5.3	0.76102	5.3	2.65421	5.3	0.81285	5.3	91.7307	5.3	49.8064	5.3
0.63555	5.78	0.06606	5.78	0.76103	5.78	2.65441	5.78	0.81286	5.78	91.7446	5.78	49.8142	5.78
0.63574	5.63	0.06607	5.63	0.76105	5.63	2.65468	5.63	0.81287	5.63	91.7589	5.63	49.8145	5.63
0.63597	5.45	0.06609	5.45	0.76106	5.45	2.65482	5.45	0.81288	5.45	91.7641	5.45	49.8515	5.45
0.63628	5.42	0.0661	5.42	0.76108	5.42	2.65486	5.42	0.81288	5.42	91.781	5.42	49.8665	5.42
0.63647	5.33	0.06611	5.33	0.76109	5.33	2.65502	5.33	0.81297	5.33	91.7818	5.33	49.8852	5.33
0.63657	5.54	0.06612	5.54	0.76113	5.54	2.65515	5.54	0.81298	5.54	91.7952	5.54	49.8916	5.54
0.63659	5.33	0.06614	5.33	0.76118	5.33	2.65598	5.33	0.81302	5.33	91.8263	5.33	49.8926	5.33
0.63673	5.67	0.06616	5.67	0.76118	5.67	2.65625	5.67	0.81304	5.67	91.897	5.67	49.8939	5.67
0.63715	5.78	0.06616	5.78	0.76131	5.78	2.65671	5.78	0.81305	5.78	91.9088	5.78	49.9088	5.78
0.63725	5.69	0.06618	5.69	0.76131	5.69	2.65673	5.69	0.81307	5.69	91.912	5.69	49.9103	5.69
0.63732	4.96	0.06618	4.96	0.76136	4.96	2.6568	4.96	0.81307	4.96	91.9214	4.96	49.9139	4.96
0.63768	5.79	0.06619	5.79	0.76139	5.79	2.65683	5.79	0.81308	5.79	91.9259	5.79	49.9257	5.79
0.63787	5.56	0.0662	5.56	0.76141	5.56	2.65717	5.56	0.8131	5.56	91.9421	5.56	49.9587	5.56
0.63824	5.2	0.06621	5.2	0.76142	5.2	2.65731	5.2	0.81321	5.2	91.9921	5.2	49.9624	5.2
0.63828	5.58	0.06624	5.58	0.76143	5.58	2.65762	5.58	0.81321	5.58	92.0242	5.58	49.9698	5.58
0.63863	5.58	0.06624	5.58	0.76145	5.58	2.65768	5.58	0.81321	5.58	92.0281	5.58	49.9718	5.58
0.6387	5.58	0.06624	5.58	0.76149	5.58	2.65768	5.58	0.81323	5.58	92.04	5.58	49.9838	5.58
0.63872	5.62	0.06626	5.62	0.76149	5.62	2.65799	5.62	0.81329	5.62	92.048	5.62	49.9979	5.62
0.63874	5.46	0.06626	5.46	0.76149	5.46	2.65936	5.46	0.81329	5.46	92.0841	5.46	50.0211	5.46
0.63917	5.65	0.06627	5.65	0.76151	5.65	2.65951	5.65	0.81333	5.65	92.0967	5.65	50.0348	5.65
0.63922	5.56	0.06627	5.56	0.76152	5.56	2.65969	5.56	0.81335	5.56	92.1858	5.56	50.0413	5.56
0.63931	5.65	0.06627	5.65	0.76152	5.65	2.65986	5.65	0.81335	5.65	92.2026	5.65	50.0418	5.65
0.63965	5.35	0.06628	5.35	0.76154	5.35	2.66044	5.35	0.81335	5.35	92.2107	5.35	50.0546	5.35
0.63968	5.63	0.0663	5.63	0.76154	5.63	2.66065	5.63	0.81338	5.63	92.2794	5.63	50.0561	5.63
0.63995	5.38	0.0663	5.38	0.76155	5.38	2.66067	5.38	0.8134	5.38	92.2851	5.38	50.0602	5.38
0.64003	5.8	0.0663	5.8	0.76157	5.8	2.66074	5.8	0.81345	5.8	92.3419	5.8	50.0603	5.8
0.64038	5.24	0.06631	5.24	0.76161	5.24	2.66089	5.24	0.81345	5.24	92.349	5.24	50.0846	5.24
0.64067	5.47	0.06633	5.47	0.76161	5.47	2.66095	5.47	0.81348	5.47	92.3589	5.47	50.0849	5.47
0.64073	5.5	0.06633	5.5	0.76162	5.5	2.66164	5.5	0.81348	5.5	92.3654	5.5	50.1985	5.5
0.64146	5.54	0.06634	5.54	0.76162	5.54	2.66168	5.54	0.81349	5.54	92.3705	5.54	50.1994	5.54
0.64167	4.99	0.06635	4.99	0.76167	4.99	2.6618	4.99	0.81352	4.99	92.3745	4.99	50.2066	4.99
0.64189	5.62	0.06637	5.62	0.76171	5.62	2.6619	5.62	0.81354	5.62	92.4139	5.62	50.2275	5.62
0.64225	5.72	0.06637	5.72	0.76171	5.72	2.66198	5.72	0.81355	5.72	92.4428	5.72	50.2412	5.72
0.6423	5.34	0.06638	5.34	0.76171	5.34	2.66204	5.34	0.81358	5.34	92.4615	5.34	50.2489	5.34
0.64234	5.57	0.06638	5.57	0.76175	5.57	2.66211	5.57	0.81358	5.57	92.487	5.57	50.2711	5.57
0.64308	5.43	0.0664	5.43	0.76175	5.43	2.66213	5.43	0.81359	5.43	92.534	5.43	50.2722	5.43
0.64403	5.12	0.0664	5.12	0.76181	5.12	2.66218	5.12	0.8136	5.12	92.5354	5.12	50.2733	5.12
0.64432	5.11	0.0664	5.11	0.76182	5.11	2.66274	5.11	0.81362	5.11	92.5574	5.11	50.2856	5.11
0.64441	5.46	0.06641	5.46	0.76184	5.46	2.66298	5.46	0.81363	5.46	92.5653	5.46	50.298	5.46
0.64469	5.49	0.06641	5.49	0.76186	5.49	2.66305	5.49	0.81365	5.49	92.6307	5.49	50.3039	5.49
0.64471	5.49	0.06641	5.49	0.76186	5.49	2.6631	5.49	0.81372	5.49	92.6556	5.49	50.3177	5.49
0.64512	5.37	0.06641	5.37	0.76187	5.37	2.66337	5.37	0.81373	5.37	92.6562	5.37	50.3234	5.37
0.64519	5.32	0.06641	5.32	0.76193	5.32	2.66339	5.32	0.81379	5.32	92.7058	5.32	50.3318	5.32
0.64527	5.55	0.06641	5.55	0.76195	5.55	2.6634	5.55	0.81379	5.55	92.7237	5.55	50.3326	5.55
0.64545	5.76	0.06642	5.76	0.76195	5.76	2.66343	5.76	0.8138	5.76	92.7244	5.76	50.3546	5.76
0.6455	5.85	0.06642	5.85	0.76197	5.85	2.6638	5.85	0.81383	5.85	92.7492	5.85	50.3616	5.85
0.64554	5.65	0.06643	5.65	0.76208	5.65	2.66394	5.65	0.81385	5.65	92.7742	5.65	50.3672	5.65
0.64554	5.52	0.06643	5.52	0.76209	5.52	2.66397	5.52	0.81387	5.52	92.809	5.52	50.3751	5.52
0.64563	5.3	0.06643	5.3	0.76209	5.3	2.66428	5.3	0.8139	5.3	92.8496	5.3	50.4026	5.3
0.64576	5.48	0.06643	5.48	0.76209	5.48	2.66434	5.48	0.81393	5.48	92.87	5.48	50.4364	5.48
0.6465	5.45	0.06645	5.45	0.7621	5.45	2.66435	5.45	0.81406	5.45	92.9114	5.45	50.4368	5.45
0.64669	5.48	0.06646	5.48	0.76213	5.48	2.66439	5.48	0.8141	5.48	92.9195	5.48	50.4462	5.48
0.6468	5.6	0.06647	5.6	0.76218	5.6	2.66459	5.6	0.8141	5.6	92.9389	5.6	50.4715	5.6
0.64693	5.82	0.06647	5.82	0.76219	5.82	2.66468	5.82	0.81419	5.82	92.9441	5.82	50.4955	5.82
0.64703	5.69	0.06647	5.69	0.76222	5.69	2.66485	5.69	0.8142	5.69	92.9488	5.69	50.5087	5.69
0.64891	5.25	0.06648	5.25	0.76224	5.25	2.66487	5.25	0.81423	5.25	92.9706	5.25	50.5242	5.25
0.649	5.62	0.06648	5.62	0.76226	5.62	2.66494	5.62	0.81423	5.62	92.9851	5.62	50.5311	5.62
0.64913	5.66	0.06648	5.66	0.76226	5.66	2.66515	5.66	0.81424	5.66	92.9989	5.66	50.5413	5.66
0.64937	5.67	0.06649	5.67	0.76228	5.67	2.66543	5.67	0.81428	5.67	93.0144	5.67	50.5446	5.67
0.64946	5.7	0.06649	5.7	0.76228	5.7	2.66558	5.7	0.81434	5.7	93.0627	5.7	50.545	5.7
0.64946	5.56	0.0665	5.56	0.76229	5.56	2.66587	5.56	0.81442	5.56	93.0693	5.56	50.5484	5.56
0.64948	5.77	0.06651	5.77	0.76231	5.77	2.66676	5.77	0.81445	5.77	93.0802	5.77	50.5492	5.77
0.64982	5.57	0.06651	5.57	0.76236	5.57	2.66709	5.57	0.81446	5.57	93.1059	5.57	50.5608	5.57
0.64997	5.53	0.06651	5.53	0.76236	5.53	2.66713	5.53	0.8145	5.53	93.1433	5.53	50.5675	5.53
0.65008	5.26	0.06654	5.26	0.76236	5.26	2.66744	5.26	0.81457	5.26	93.1479	5.26	50.5715	5.26
0.65012	5.7	0.06654	5.7	0.76243	5.7	2.66784	5.7	0.81462	5.7	93.1576	5.7	50.5767	5.7
0.65087	5.56	0.06654	5.56	0.76252	5.56	2.66818	5.56	0.81463	5.56	93.1772	5.56	50.5856	5.56
0.65098	5.34	0.06655	5.34	0.76254	5.34	2.66848	5.34	0.8147	5.34	93.2376	5.34	50.6416	5.34
0.65102	5.61	0.06655	5.61	0.76259	5.61	2.66856	5.61	0.81473	5.61	93.252	5.61	50.6598	5.61
0.65128	5.7	0.06655	5.7	0.76259	5.7	2.66878	5.7	0.81475	5.7	93.3395	5.7	50.678	5.7
0.65129	5.37	0.06657	5.37	0.76263	5.37	2.6689	5.37	0.8148	5.37	93.3708	5.37	50.7032	5.37
0.65131	5.79	0.06657	5.79	0.76264	5.79	2.66891	5.79	0.81481	5.79	93.3895	5.79	50.7083	5.79
0.65153	5.39	0.06657	5.39	0.76264	5.39	2.6691	5.39	0.81483	5.39	93.3974	5.39	50.7166	5.39
0.65161	5.65	0.06657	5.65	0.76264	5.65	2.66912	5.65	0.81486	5.65	93.406	5.65	50.7296	5.65
0.65175	5.55	0.06657	5.55	0.76265	5.55	2.66918	5.55	0.81489	5.55	93.4084	5.55	50.7338	5.55
0.65178	5.4	0.06658	5.4	0.76267	5.4	2.66924	5.4	0.8149	5.4	93.4263	5.4	50.7399	5.4
0.65212	5.35	0.06658	5.35	0.76275	5.35	2.66934	5.35	0.81491	5.35	93.4352	5.35	50.7409	5.35
0.65227	5.89	0.06659	5.89	0.76281	5.89	2.66951	5.89	0.81495	5.89	93.4383	5.89	50.7499	5.89
0.65248	5.17	0.06659	5.17	0.76281	5.17	2.66958	5.17	0.81501	5.17	93.4446	5.17	50.7559	5.17
0.65277	5.81	0.06662	5.81	0.76282	5.81	2.66973	5.81	0.81501	5.81	93.453	5.81	50.7643	5.81
0.65284	5.47	0.06664	5.47	0.76287	5.47	2.66981	5.47	0.81503	5.47	93.4696	5.47	50.7643	5.47
0.65352	5.74	0.06664	5.74	0.76288	5.74	2.66983	5.74	0.81505	5.74	93.5057	5.74	50.7737	5.74
0.65352	5.28	0.06664	5.28	0.76289	5.28	2.6699	5.28	0.81513	5.28	93.5523	5.28	50.7775	5.28
0.65399	5.43	0.06666	5.43	0.76294	5.43	2.67005	5.43	0.81514	5.43	93.5547	5.43	50.7856	5.43
0.65403	5.56	0.06666	5.56	0.76294	5.56	2.67009	5.56	0.81518	5.56	93.5609	5.56	50.7931	5.56
0.65411	5.42	0.06667	5.42	0.76302	5.42	2.67011	5.42	0.81536	5.42	93.5696	5.42	50.7995	5.42
0.65426	5.7	0.06668	5.7	0.76302	5.7	2.67011	5.7	0.81543	5.7	93.6177	5.7	50.8076	5.7
0.6546	5.29	0.06669	5.29	0.76304	5.29	2.67055	5.29	0.81543	5.29	93.6604	5.29	50.8139	5.29
0.65465	5.21	0.06669	5.21	0.76305	5.21	2.67074	5.21	0.81546	5.21	93.6753	5.21	50.8197	5.21
0.65467	5.27	0.0667	5.27	0.76307	5.27	2.67094	5.27	0.81546	5.27	93.7364	5.27	50.8224	5.27
0.65479	5.84	0.06671	5.84	0.76309	5.84	2.67095	5.84	0.81549	5.84	93.8965	5.84	50.8479	5.84
0.6548	5.23	0.06671	5.23	0.76309	5.23	2.67098	5.23	0.81553	5.23	93.9053	5.23	50.8502	5.23
0.65496	5.35	0.06672	5.35	0.76314	5.35	2.67136	5.35	0.81558	5.35	93.9298	5.35	50.8651	5.35
0.65498	5.32	0.06672	5.32	0.76317	5.32	2.6717	5.32	0.81562	5.32	93.9832	5.32	50.8826	5.32
0.65543	5.42	0.06672	5.42	0.76319	5.42	2.67184	5.42	0.81567	5.42	93.9965	5.42	50.8838	5.42
0.65561	5.72	0.06673	5.72	0.7632	5.72	2.67186	5.72	0.8157	5.72	94.0011	5.72	50.9145	5.72
0.65565	5.74	0.06673	5.74	0.76323	5.74	2.67211	5.74	0.81579	5.74	94.0234	5.74	50.9311	5.74
0.65569	5.68	0.06673	5.68	0.76324	5.68	2.67245	5.68	0.81589	5.68	94.0272	5.68	50.9344	5.68
0.65569	5.57	0.06674	5.57	0.76325	5.57	2.67306	5.57	0.81591	5.57	94.0704	5.57	50.9362	5.57
0.65572	5.48	0.06674	5.48	0.76325	5.48	2.67317	5.48	0.81595	5.48	94.0726	5.48	50.9619	5.48
0.65573	5.76	0.06675	5.76	0.76327	5.76	2.67327	5.76	0.81598	5.76	94.0874	5.76	50.9632	5.76
0.65586	5.29	0.06676	5.29	0.76328	5.29	2.67328	5.29	0.816	5.29	94.0901	5.29	50.9651	5.29
0.6561	5.6	0.06677	5.6	0.7633	5.6	2.67329	5.6	0.81603	5.6	94.1173	5.6	50.9686	5.6
0.65624	5.47	0.06677	5.47	0.76332	5.47	2.67337	5.47	0.81613	5.47	94.135	5.47	50.9702	5.47
0.65637	5.46	0.06677	5.46	0.76334	5.46	2.67343	5.46	0.81613	5.46	94.2421	5.46	50.9822	5.46
0.65641	5.14	0.06678	5.14	0.76338	5.14	2.67357	5.14	0.81614	5.14	94.2466	5.14	50.9992	5.14
0.6567	5.13	0.0668	5.13	0.76338	5.13	2.67395	5.13	0.81621	5.13	94.2736	5.13	51.0005	5.13
0.65683	5.33	0.0668	5.33	0.76342	5.33	2.67397	5.33	0.81623	5.33	94.297	5.33	51.0024	5.33
0.65694	5.59	0.06681	5.59	0.76344	5.59	2.67412	5.59	0.81627	5.59	94.3052	5.59	51.0149	5.59
0.65701	5.65	0.06682	5.65	0.76344	5.65	2.67424	5.65	0.81628	5.65	94.3437	5.65	51.0173	5.65
0.65706	6.04	0.06683	6.04	0.76347	6.04	2.67437	6.04	0.81638	6.04	94.3677	6.04	51.0209	6.04
0.65706	5.57	0.06683	5.57	0.76348	5.57	2.67462	5.57	0.81639	5.57	94.4791	5.57	51.0466	5.57
0.65756	5.46	0.06683	5.46	0.76349	5.46	2.67478	5.46	0.81643	5.46	94.4862	5.46	51.0483	5.46
0.65778	5.93	0.06684	5.93	0.7635	5.93	2.67489	5.93	0.81644	5.93	94.4946	5.93	51.0571	5.93
0.65804	5.79	0.06686	5.79	0.76355	5.79	2.67507	5.79	0.81646	5.79	94.4948	5.79	51.0767	5.79
0.65812	5.82	0.06687	5.82	0.76356	5.82	2.67542	5.82	0.81655	5.82	94.5028	5.82	51.0817	5.82
0.65838	5.57	0.06687	5.57	0.76361	5.57	2.67542	5.57	0.81662	5.57	94.5128	5.57	51.0847	5.57
0.65846	5.57	0.06687	5.57	0.76362	5.57	2.6755	5.57	0.81662	5.57	94.5299	5.57	51.1037	5.57
0.65854	5.28	0.06688	5.28	0.76362	5.28	2.67588	5.28	0.81664	5.28	94.558	5.28	51.1068	5.28
0.65859	5.88	0.06689	5.88	0.76368	5.88	2.67619	5.88	0.81668	5.88	94.5645	5.88	51.1086	5.88
0.65863	5.43	0.06689	5.43	0.76368	5.43	2.67626	5.43	0.81676	5.43	94.5764	5.43	51.1206	5.43
0.65881	5.5	0.06689	5.5	0.76373	5.5	2.67632	5.5	0.81677	5.5	94.6003	5.5	51.1335	5.5
0.65889	5.55	0.0669	5.55	0.76376	5.55	2.67652	5.55	0.81678	5.55	94.6008	5.55	51.1576	5.55
0.65891	5.67	0.06691	5.67	0.76376	5.67	2.67658	5.67	0.81682	5.67	94.6089	5.67	51.1649	5.67
0.65952	5.49	0.06691	5.49	0.76376	5.49	2.6769	5.49	0.81682	5.49	94.6356	5.49	51.1653	5.49
0.65956	5.38	0.06691	5.38	0.76377	5.38	2.67711	5.38	0.81683	5.38	94.6526	5.38	51.1659	5.38
0.65966	5.53	0.06692	5.53	0.76377	5.53	2.6773	5.53	0.81686	5.53	94.7016	5.53	51.1817	5.53
0.66002	5.71	0.06693	5.71	0.76378	5.71	2.67736	5.71	0.81696	5.71	94.7069	5.71	51.1984	5.71
0.66037	5.64	0.06694	5.64	0.76379	5.64	2.67737	5.64	0.817	5.64	94.7186	5.64	51.2139	5.64
0.66046	5.46	0.06695	5.46	0.7638	5.46	2.67756	5.46	0.81701	5.46	94.7699	5.46	51.2161	5.46
0.66062	5.5	0.06695	5.5	0.76383	5.5	2.67759	5.5	0.8171	5.5	94.7874	5.5	51.2167	5.5
0.66063	5.26	0.06695	5.26	0.76384	5.26	2.67764	5.26	0.81725	5.26	94.8611	5.26	51.2204	5.26
0.66095	5.64	0.06696	5.64	0.76384	5.64	2.67774	5.64	0.81727	5.64	94.869	5.64	51.2206	5.64
0.66097	5.34	0.06696	5.34	0.76393	5.34	2.67788	5.34	0.8173	5.34	94.8694	5.34	51.2216	5.34
0.66105	5.53	0.06697	5.53	0.76404	5.53	2.67793	5.53	0.81737	5.53	94.8847	5.53	51.2301	5.53
0.66126	5.45	0.06697	5.45	0.76407	5.45	2.67818	5.45	0.81738	5.45	94.9839	5.45	51.2309	5.45
0.66134	5.89	0.06698	5.89	0.76407	5.89	2.6782	5.89	0.81753	5.89	95.0022	5.89	51.2375	5.89
0.66137	5.45	0.06699	5.45	0.7641	5.45	2.67849	5.45	0.81755	5.45	95.0439	5.45	51.2412	5.45
0.66157	5.25	0.067	5.25	0.76411	5.25	2.67855	5.25	0.81761	5.25	95.0547	5.25	51.2579	5.25
0.6616	5.43	0.067	5.43	0.76412	5.43	2.67856	5.43	0.81765	5.43	95.0625	5.43	51.26	5.43
0.66167	5.6	0.06701	5.6	0.76416	5.6	2.67895	5.6	0.81767	5.6	95.0726	5.6	51.2763	5.6
0.66175	5.52	0.06701	5.52	0.76418	5.52	2.67897	5.52	0.81775	5.52	95.1657	5.52	51.2838	5.52
0.66178	5.37	0.06702	5.37	0.76419	5.37	2.67932	5.37	0.81778	5.37	95.1725	5.37	51.2873	5.37
0.66184	5.48	0.06702	5.48	0.76423	5.48	2.67935	5.48	0.81779	5.48	95.1819	5.48	51.2919	5.48
0.66186	5.49	0.06702	5.49	0.76425	5.49	2.67954	5.49	0.81782	5.49	95.1922	5.49	51.296	5.49
0.66188	5.3	0.06704	5.3	0.76425	5.3	2.67965	5.3	0.81794	5.3	95.2211	5.3	51.3126	5.3
0.662	5.43	0.06704	5.43	0.76429	5.43	2.67966	5.43	0.81795	5.43	95.2482	5.43	51.3231	5.43
0.66209	5.98	0.06704	5.98	0.76433	5.98	2.67973	5.98	0.81806	5.98	95.275	5.98	51.3247	5.98
0.66216	5.27	0.06704	5.27	0.76435	5.27	2.67992	5.27	0.81811	5.27	95.3203	5.27	51.3262	5.27
0.66218	5.64	0.06705	5.64	0.76436	5.64	2.68007	5.64	0.81822	5.64	95.3221	5.64	51.3344	5.64
0.66224	5.48	0.06705	5.48	0.76437	5.48	2.68012	5.48	0.81822	5.48	95.3371	5.48	51.3456	5.48
0.66236	5.68	0.06706	5.68	0.76438	5.68	2.6802	5.68	0.81829	5.68	95.3372	5.68	51.3654	5.68
0.66246	5.62	0.06706	5.62	0.76443	5.62	2.68029	5.62	0.81833	5.62	95.3945	5.62	51.38	5.62
0.66262	5.44	0.06706	5.44	0.76446	5.44	2.68045	5.44	0.81835	5.44	95.418	5.44	51.3802	5.44
0.66271	5.64	0.06706	5.64	0.76447	5.64	2.68052	5.64	0.81843	5.64	95.4766	5.64	51.3887	5.64
0.66271	5.12	0.06707	5.12	0.76448	5.12	2.68069	5.12	0.81854	5.12	95.4861	5.12	51.3938	5.12
0.66292	5.41	0.06708	5.41	0.76449	5.41	2.68069	5.41	0.81855	5.41	95.507	5.41	51.4134	5.41
0.66299	5.48	0.06709	5.48	0.76449	5.48	2.68074	5.48	0.81863	5.48	95.5122	5.48	51.4233	5.48
0.66305	5.37	0.0671	5.37	0.76449	5.37	2.68121	5.37	0.81865	5.37	95.5547	5.37	51.429	5.37
0.6631	5.75	0.06711	5.75	0.7645	5.75	2.68146	5.75	0.81866	5.75	95.672	5.75	51.4347	5.75
0.66343	5.59	0.06712	5.59	0.76454	5.59	2.68153	5.59	0.81867	5.59	95.6914	5.59	51.4362	5.59
0.6635	5.66	0.06712	5.66	0.76457	5.66	2.68174	5.66	0.8187	5.66	95.693	5.66	51.438	5.66
0.66353	5.69	0.06712	5.69	0.76457	5.69	2.68176	5.69	0.81878	5.69	95.6968	5.69	51.4447	5.69
0.66365	5.34	0.06712	5.34	0.76457	5.34	2.68181	5.34	0.81879	5.34	95.7137	5.34	51.4459	5.34
0.66366	5.58	0.06712	5.58	0.7646	5.58	2.68195	5.58	0.81885	5.58	95.7825	5.58	51.4594	5.58
0.6637	5.66	0.06713	5.66	0.76461	5.66	2.68217	5.66	0.81887	5.66	95.8157	5.66	51.4658	5.66
0.66371	5.47	0.06713	5.47	0.76464	5.47	2.68259	5.47	0.81888	5.47	95.895	5.47	51.4758	5.47
0.66404	5.52	0.06715	5.52	0.76464	5.52	2.68267	5.52	0.8189	5.52	95.8967	5.52	51.4835	5.52
0.66412	5.56	0.06716	5.56	0.76464	5.56	2.68289	5.56	0.81893	5.56	95.9742	5.56	51.4862	5.56
0.66417	5.34	0.06716	5.34	0.76465	5.34	2.68313	5.34	0.81893	5.34	96.0053	5.34	51.5036	5.34
0.66426	5.51	0.06717	5.51	0.76466	5.51	2.68335	5.51	0.81894	5.51	96.0131	5.51	51.5071	5.51
0.66448	5.17	0.06717	5.17	0.76469	5.17	2.68357	5.17	0.81904	5.17	96.0205	5.17	51.5374	5.17
0.66464	5.61	0.06717	5.61	0.7647	5.61	2.68357	5.61	0.8193	5.61	96.0385	5.61	51.5502	5.61
0.66502	5.79	0.06717	5.79	0.76472	5.79	2.68361	5.79	0.8193	5.79	96.0453	5.79	51.552	5.79
0.66504	5.44	0.06717	5.44	0.76475	5.44	2.68364	5.44	0.81931	5.44	96.0818	5.44	51.5549	5.44
0.66551	5.28	0.06718	5.28	0.76477	5.28	2.68365	5.28	0.81937	5.28	96.1136	5.28	51.5593	5.28
0.66565	5.8	0.06718	5.8	0.76479	5.8	2.68383	5.8	0.81939	5.8	96.1153	5.8	51.5703	5.8
0.66577	6.19	0.06719	6.19	0.76483	6.19	2.68401	6.19	0.8194	6.19	96.1153	6.19	51.5735	6.19
0.66582	5.7	0.06719	5.7	0.76485	5.7	2.6841	5.7	0.8194	5.7	96.1157	5.7	51.5823	5.7
0.66589	5.26	0.06719	5.26	0.7649	5.26	2.68415	5.26	0.81941	5.26	96.1446	5.26	51.5867	5.26
0.66597	5.56	0.06721	5.56	0.76491	5.56	2.68432	5.56	0.81941	5.56	96.1586	5.56	51.5896	5.56
0.66613	5.63	0.06722	5.63	0.76493	5.63	2.68442	5.63	0.81947	5.63	96.1636	5.63	51.5921	5.63
0.66631	5.44	0.06722	5.44	0.76493	5.44	2.68468	5.44	0.81973	5.44	96.167	5.44	51.5971	5.44
0.66632	5.64	0.06722	5.64	0.76494	5.64	2.68512	5.64	0.81974	5.64	96.1747	5.64	51.6079	5.64
0.66643	5.69	0.06724	5.69	0.76495	5.69	2.6854	5.69	0.81976	5.69	96.1876	5.69	51.6105	5.69
0.66649	5.56	0.06726	5.56	0.765	5.56	2.68544	5.56	0.8198	5.56	96.2083	5.56	51.6117	5.56
0.66672	5.6	0.06726	5.6	0.76502	5.6	2.68547	5.6	0.8198	5.6	96.2129	5.6	51.6139	5.6
0.66687	5.33	0.06727	5.33	0.76503	5.33	2.68548	5.33	0.81985	5.33	96.226	5.33	51.614	5.33
0.66708	5.84	0.06727	5.84	0.76506	5.84	2.6857	5.84	0.81988	5.84	96.2749	5.84	51.6152	5.84
0.66731	5.74	0.06727	5.74	0.76506	5.74	2.68572	5.74	0.81992	5.74	96.2894	5.74	51.6164	5.74
0.66731	5.39	0.06728	5.39	0.76507	5.39	2.68588	5.39	0.81993	5.39	96.3071	5.39	51.6165	5.39
0.66736	5.4	0.06728	5.4	0.76509	5.4	2.68592	5.4	0.81993	5.4	96.3156	5.4	51.6206	5.4
0.66753	5.82	0.06729	5.82	0.76511	5.82	2.68621	5.82	0.81999	5.82	96.3687	5.82	51.6214	5.82
0.66778	5.43	0.0673	5.43	0.76515	5.43	2.68633	5.43	0.81999	5.43	96.4199	5.43	51.6522	5.43
0.66781	5.64	0.06731	5.64	0.76516	5.64	2.68638	5.64	0.82	5.64	96.4872	5.64	51.6531	5.64
0.66784	5.72	0.06731	5.72	0.76517	5.72	2.68667	5.72	0.82003	5.72	96.4954	5.72	51.6691	5.72
0.66794	5.57	0.06734	5.57	0.76518	5.57	2.68687	5.57	0.82004	5.57	96.5264	5.57	51.6831	5.57
0.6681	5.68	0.06734	5.68	0.76519	5.68	2.6869	5.68	0.82007	5.68	96.5756	5.68	51.6836	5.68
0.66833	5.89	0.06734	5.89	0.76525	5.89	2.68697	5.89	0.82008	5.89	96.6334	5.89	51.6969	5.89
0.66836	5.5	0.06734	5.5	0.76525	5.5	2.68708	5.5	0.82011	5.5	96.6422	5.5	51.6977	5.5
0.66844	5.7	0.06735	5.7	0.76532	5.7	2.68752	5.7	0.82014	5.7	96.6492	5.7	51.719	5.7
0.66858	5.55	0.06735	5.55	0.76532	5.55	2.68756	5.55	0.82018	5.55	96.6504	5.55	51.7192	5.55
0.66865	5.17	0.06736	5.17	0.76534	5.17	2.68767	5.17	0.82019	5.17	96.6915	5.17	51.7262	5.17
0.66894	5.56	0.06736	5.56	0.76536	5.56	2.68779	5.56	0.82023	5.56	96.6962	5.56	51.7302	5.56
0.66915	5.5	0.06736	5.5	0.76536	5.5	2.68782	5.5	0.82035	5.5	96.7323	5.5	51.7305	5.5
0.66928	5.51	0.06737	5.51	0.76537	5.51	2.68803	5.51	0.82042	5.51	96.8216	5.51	51.7366	5.51
0.66931	5.62	0.06738	5.62	0.76538	5.62	2.68819	5.62	0.82042	5.62	96.9552	5.62	51.7431	5.62
0.66945	5.52	0.06739	5.52	0.7654	5.52	2.68837	5.52	0.82044	5.52	96.9552	5.52	51.7484	5.52
0.66963	5.53	0.0674	5.53	0.76544	5.53	2.68868	5.53	0.82048	5.53	97.0162	5.53	51.75	5.53
0.66964	5.6	0.0674	5.6	0.76545	5.6	2.68874	5.6	0.82053	5.6	97.0279	5.6	51.7584	5.6
0.66973	5.43	0.0674	5.43	0.76545	5.43	2.68878	5.43	0.82067	5.43	97.0284	5.43	51.7725	5.43
0.66984	5.47	0.06742	5.47	0.7655	5.47	2.68887	5.47	0.8207	5.47	97.0397	5.47	51.7983	5.47
0.66986	5.88	0.06743	5.88	0.76554	5.88	2.68897	5.88	0.82072	5.88	97.0402	5.88	51.8072	5.88
0.66992	5.61	0.06743	5.61	0.76554	5.61	2.6892	5.61	0.82096	5.61	97.0484	5.61	51.8102	5.61
0.66993	5.51	0.06743	5.51	0.76554	5.51	2.68931	5.51	0.82099	5.51	97.0571	5.51	51.8124	5.51
0.67035	5.81	0.06743	5.81	0.76554	5.81	2.68938	5.81	0.82105	5.81	97.0619	5.81	51.8137	5.81
0.67045	5.58	0.06744	5.58	0.76563	5.58	2.6894	5.58	0.82106	5.58	97.0766	5.58	51.8209	5.58
0.67054	5.35	0.06744	5.35	0.76565	5.35	2.68954	5.35	0.82114	5.35	97.0949	5.35	51.821	5.35
0.6706	5.73	0.06744	5.73	0.76567	5.73	2.68961	5.73	0.82114	5.73	97.1092	5.73	51.8214	5.73
0.67063	5.62	0.06745	5.62	0.76567	5.62	2.68973	5.62	0.82121	5.62	97.1173	5.62	51.8216	5.62
0.67064	5.14	0.06746	5.14	0.76568	5.14	2.68979	5.14	0.82124	5.14	97.1383	5.14	51.8241	5.14
0.67069	5.5	0.06747	5.5	0.76574	5.5	2.6898	5.5	0.82127	5.5	97.146	5.5	51.8271	5.5
0.67069	6.06	0.06748	6.06	0.76576	6.06	2.6898	6.06	0.8213	6.06	97.2123	6.06	51.842	6.06
0.67073	5.87	0.06749	5.87	0.76576	5.87	2.68982	5.87	0.82131	5.87	97.2782	5.87	51.8432	5.87
0.67124	5.62	0.06749	5.62	0.76576	5.62	2.68996	5.62	0.82141	5.62	97.3132	5.62	51.8544	5.62
0.67138	5.32	0.0675	5.32	0.76579	5.32	2.6901	5.32	0.82147	5.32	97.3619	5.32	51.8577	5.32
0.67138	5.57	0.06751	5.57	0.76581	5.57	2.69011	5.57	0.82165	5.57	97.3818	5.57	51.8662	5.57
0.67145	5.61	0.06751	5.61	0.76582	5.61	2.69014	5.61	0.82165	5.61	97.4076	5.61	51.875	5.61
0.6718	5.69	0.06753	5.69	0.76586	5.69	2.69035	5.69	0.82171	5.69	97.4387	5.69	51.8828	5.69
0.67193	5.69	0.06753	5.69	0.76587	5.69	2.69045	5.69	0.82173	5.69	97.4402	5.69	51.8831	5.69
0.67195	5.15	0.06753	5.15	0.76592	5.15	2.69065	5.15	0.8219	5.15	97.4741	5.15	51.8874	5.15
0.67223	5.42	0.06754	5.42	0.76593	5.42	2.69088	5.42	0.82193	5.42	97.4996	5.42	51.8905	5.42
0.67242	5.46	0.06754	5.46	0.76593	5.46	2.69089	5.46	0.82197	5.46	97.5067	5.46	51.8955	5.46
0.67249	5.62	0.06756	5.62	0.76593	5.62	2.69106	5.62	0.82198	5.62	97.5329	5.62	51.8997	5.62
0.67257	5.74	0.06756	5.74	0.76593	5.74	2.6911	5.74	0.82199	5.74	97.5468	5.74	51.9246	5.74
0.67282	5.54	0.06757	5.54	0.76594	5.54	2.69153	5.54	0.82203	5.54	97.5876	5.54	51.9265	5.54
0.67289	5.59	0.06758	5.59	0.76594	5.59	2.69154	5.59	0.8221	5.59	97.6196	5.59	51.9283	5.59
0.67299	5.56	0.06759	5.56	0.76598	5.56	2.69162	5.56	0.82222	5.56	97.6368	5.56	51.93	5.56
0.67303	5.87	0.0676	5.87	0.76602	5.87	2.69169	5.87	0.82226	5.87	97.644	5.87	51.9336	5.87
0.67307	5.55	0.0676	5.55	0.76608	5.55	2.69171	5.55	0.82227	5.55	97.6518	5.55	51.9387	5.55
0.67319	5.33	0.06763	5.33	0.76608	5.33	2.69201	5.33	0.8223	5.33	97.658	5.33	51.9419	5.33
0.67322	5.75	0.06764	5.75	0.7661	5.75	2.69226	5.75	0.82236	5.75	97.6666	5.75	51.9442	5.75
0.67325	5.53	0.06764	5.53	0.76619	5.53	2.69228	5.53	0.82237	5.53	97.6829	5.53	51.9507	5.53
0.67332	5.45	0.06765	5.45	0.76622	5.45	2.69276	5.45	0.82238	5.45	97.8311	5.45	51.9578	5.45
0.67334	5.21	0.06765	5.21	0.76626	5.21	2.69278	5.21	0.82252	5.21	97.8371	5.21	51.9604	5.21
0.67336	5.53	0.06765	5.53	0.76629	5.53	2.69287	5.53	0.82253	5.53	97.843	5.53	51.9607	5.53
0.67339	5.34	0.06765	5.34	0.76629	5.34	2.69295	5.34	0.82257	5.34	97.9083	5.34	51.9642	5.34
0.67346	5.58	0.06766	5.58	0.76631	5.58	2.6933	5.58	0.82258	5.58	97.9338	5.58	51.9755	5.58
0.67377	5.42	0.06766	5.42	0.76634	5.42	2.69334	5.42	0.82265	5.42	97.9347	5.42	51.9826	5.42
0.67389	5.43	0.06766	5.43	0.76636	5.43	2.69358	5.43	0.8227	5.43	97.9476	5.43	51.9843	5.43
0.67396	5.69	0.06767	5.69	0.76637	5.69	2.69367	5.69	0.82272	5.69	97.9507	5.69	51.9866	5.69
0.67417	5.61	0.06767	5.61	0.76639	5.61	2.69371	5.61	0.82275	5.61	97.9536	5.61	51.9866	5.61
0.67427	5.09	0.06767	5.09	0.76641	5.09	2.69372	5.09	0.82275	5.09	97.9594	5.09	51.9997	5.09
0.67433	5.69	0.06768	5.69	0.76641	5.69	2.69394	5.69	0.82276	5.69	97.9623	5.69	52.0003	5.69
0.67443	5.43	0.06768	5.43	0.76643	5.43	2.69399	5.43	0.82278	5.43	97.9743	5.43	52.0016	5.43
0.67455	5.5	0.06769	5.5	0.76643	5.5	2.69403	5.5	0.82279	5.5	98.0061	5.5	52.0029	5.5
0.67471	5.56	0.0677	5.56	0.76644	5.56	2.69407	5.56	0.82291	5.56	98.0096	5.56	52.0088	5.56
0.67477	5.79	0.06771	5.79	0.76648	5.79	2.69425	5.79	0.82291	5.79	98.017	5.79	52.0103	5.79
0.6751	5.86	0.06771	5.86	0.76652	5.86	2.6943	5.86	0.82293	5.86	98.0343	5.86	52.0149	5.86
0.6752	5.65	0.06771	5.65	0.76652	5.65	2.6947	5.65	0.82301	5.65	98.1515	5.65	52.0201	5.65
0.67532	5.38	0.06772	5.38	0.76657	5.38	2.69477	5.38	0.82305	5.38	98.1563	5.38	52.0238	5.38
0.67542	5.32	0.06772	5.32	0.76662	5.32	2.69491	5.32	0.82306	5.32	98.1605	5.32	52.0356	5.32
0.67593	5.67	0.06772	5.67	0.76662	5.67	2.69494	5.67	0.82311	5.67	98.1974	5.67	52.0476	5.67
0.67595	5.78	0.06773	5.78	0.76665	5.78	2.69497	5.78	0.82312	5.78	98.2883	5.78	52.051	5.78
0.67596	5.51	0.06773	5.51	0.76665	5.51	2.69499	5.51	0.82312	5.51	98.2973	5.51	52.0609	5.51
0.67598	5.39	0.06774	5.39	0.76665	5.39	2.69502	5.39	0.82313	5.39	98.3694	5.39	52.0669	5.39
0.67613	5.08	0.06776	5.08	0.7667	5.08	2.69597	5.08	0.82319	5.08	98.3832	5.08	52.0687	5.08
0.67615	5.48	0.06779	5.48	0.7667	5.48	2.69607	5.48	0.82321	5.48	98.3906	5.48	52.0745	5.48
0.67616	5.47	0.06781	5.47	0.76675	5.47	2.69624	5.47	0.82323	5.47	98.4398	5.47	52.075	5.47
0.67618	5.46	0.06781	5.46	0.76676	5.46	2.69625	5.46	0.82328	5.46	98.4452	5.46	52.0757	5.46
0.67624	5.22	0.06781	5.22	0.76676	5.22	2.69636	5.22	0.82329	5.22	98.4537	5.22	52.0772	5.22
0.67635	5.3	0.06782	5.3	0.76681	5.3	2.69641	5.3	0.82329	5.3	98.5143	5.3	52.0874	5.3
0.67652	5.63	0.06783	5.63	0.76684	5.63	2.69648	5.63	0.82331	5.63	98.5381	5.63	52.0918	5.63
0.6766	5.31	0.06783	5.31	0.76694	5.31	2.69657	5.31	0.82332	5.31	98.55	5.31	52.0938	5.31
0.67663	5.28	0.06783	5.28	0.76696	5.28	2.69659	5.28	0.82337	5.28	98.5777	5.28	52.1057	5.28
0.67668	5.78	0.06785	5.78	0.76697	5.78	2.69663	5.78	0.82345	5.78	98.6387	5.78	52.1064	5.78
0.67683	5.75	0.06785	5.75	0.76699	5.75	2.69689	5.75	0.82349	5.75	98.6388	5.75	52.1072	5.75
0.67689	5.54	0.06786	5.54	0.76701	5.54	2.697	5.54	0.8235	5.54	98.6391	5.54	52.1091	5.54
0.67696	5.65	0.06786	5.65	0.76701	5.65	2.69704	5.65	0.82351	5.65	98.6811	5.65	52.1093	5.65
0.67704	5.77	0.06786	5.77	0.76701	5.77	2.69716	5.77	0.82351	5.77	98.7568	5.77	52.1181	5.77
0.67707	5.48	0.06788	5.48	0.76705	5.48	2.69722	5.48	0.82354	5.48	98.7609	5.48	52.1272	5.48
0.67716	5.62	0.06788	5.62	0.76706	5.62	2.69723	5.62	0.82358	5.62	98.7712	5.62	52.1296	5.62
0.67724	5.11	0.0679	5.11	0.76708	5.11	2.69748	5.11	0.82362	5.11	98.8438	5.11	52.1319	5.11
0.6773	5.74	0.0679	5.74	0.76708	5.74	2.69751	5.74	0.82367	5.74	98.8467	5.74	52.1332	5.74
0.67733	5.31	0.0679	5.31	0.76709	5.31	2.69759	5.31	0.82371	5.31	98.8559	5.31	52.1372	5.31
0.67742	5.98	0.06791	5.98	0.7671	5.98	2.6976	5.98	0.82373	5.98	98.8645	5.98	52.1407	5.98
0.67745	5.61	0.06791	5.61	0.76713	5.61	2.69764	5.61	0.82374	5.61	98.8645	5.61	52.1488	5.61
0.67799	5.43	0.06792	5.43	0.76715	5.43	2.69789	5.43	0.82377	5.43	98.8683	5.43	52.1501	5.43
0.67799	5.61	0.06795	5.61	0.76715	5.61	2.69789	5.61	0.82381	5.61	98.8931	5.61	52.1523	5.61
0.67825	5.39	0.06795	5.39	0.76716	5.39	2.69804	5.39	0.82384	5.39	98.8945	5.39	52.1552	5.39
0.67835	5.56	0.06797	5.56	0.76716	5.56	2.6984	5.56	0.82385	5.56	98.904	5.56	52.1614	5.56
0.67839	5.62	0.06801	5.62	0.76717	5.62	2.69842	5.62	0.82392	5.62	98.9255	5.62	52.1724	5.62
0.67854	5.27	0.06803	5.27	0.76719	5.27	2.69854	5.27	0.82392	5.27	98.9315	5.27	52.1829	5.27
0.67857	5.76	0.06803	5.76	0.76719	5.76	2.69859	5.76	0.82395	5.76	98.9483	5.76	52.1872	5.76
0.67878	5.29	0.06803	5.29	0.76733	5.29	2.69889	5.29	0.82396	5.29	98.9607	5.29	52.1911	5.29
0.67887	5.4	0.06804	5.4	0.76733	5.4	2.6989	5.4	0.82396	5.4	98.9821	5.4	52.1956	5.4
0.67893	5.36	0.06804	5.36	0.76733	5.36	2.69892	5.36	0.82402	5.36	98.9916	5.36	52.1972	5.36
0.67896	5.32	0.06804	5.32	0.76736	5.32	2.69898	5.32	0.82403	5.32	99.0131	5.32	52.2024	5.32
0.67899	5.55	0.06805	5.55	0.76739	5.55	2.69904	5.55	0.82406	5.55	99.0264	5.55	52.2054	5.55
0.67909	5.06	0.06807	5.06	0.76739	5.06	2.69933	5.06	0.82407	5.06	99.047	5.06	52.2076	5.06
0.6792	5.59	0.06809	5.59	0.76739	5.59	2.69938	5.59	0.82413	5.59	99.0525	5.59	52.2082	5.59
0.6792	5.55	0.06809	5.55	0.76746	5.55	2.69939	5.55	0.82415	5.55	99.0734	5.55	52.2089	5.55
0.67925	5.7	0.06809	5.7	0.76747	5.7	2.6994	5.7	0.82422	5.7	99.2029	5.7	52.2109	5.7
0.67929	5.59	0.06809	5.59	0.76747	5.59	2.69947	5.59	0.82422	5.59	99.2029	5.59	52.2201	5.59
0.67932	5.71	0.06809	5.71	0.76748	5.71	2.69947	5.71	0.82426	5.71	99.2195	5.71	52.2212	5.71
0.67932	5.59	0.06809	5.59	0.76752	5.59	2.6997	5.59	0.82441	5.59	99.2531	5.59	52.229	5.59
0.67944	5.6	0.06813	5.6	0.76757	5.6	2.69974	5.6	0.82443	5.6	99.296	5.6	52.2292	5.6
0.67953	5.78	0.06813	5.78	0.76765	5.78	2.69976	5.78	0.82446	5.78	99.3342	5.78	52.2318	5.78
0.67978	5.9	0.06813	5.9	0.7677	5.9	2.7003	5.9	0.82455	5.9	99.3521	5.9	52.2329	5.9
0.67994	5.42	0.06813	5.42	0.76775	5.42	2.70045	5.42	0.82457	5.42	99.3623	5.42	52.2359	5.42
0.68004	5.7	0.06814	5.7	0.76776	5.7	2.70056	5.7	0.82464	5.7	99.3877	5.7	52.241	5.7
0.68052	5.52	0.06815	5.52	0.76776	5.52	2.70077	5.52	0.82465	5.52	99.4139	5.52	52.2432	5.52
0.68072	5.59	0.06816	5.59	0.76777	5.59	2.70079	5.59	0.82479	5.59	99.4244	5.59	52.2441	5.59
0.68083	5.69	0.06816	5.69	0.76777	5.69	2.70095	5.69	0.82486	5.69	99.4534	5.69	52.2443	5.69
0.68088	5.72	0.06817	5.72	0.76782	5.72	2.70105	5.72	0.82495	5.72	99.5118	5.72	52.2449	5.72
0.68096	5.71	0.06817	5.71	0.76784	5.71	2.70116	5.71	0.82496	5.71	99.5358	5.71	52.2467	5.71
0.68097	5.38	0.06818	5.38	0.76784	5.38	2.70124	5.38	0.82499	5.38	99.5445	5.38	52.2486	5.38
0.68101	5.08	0.06818	5.08	0.76791	5.08	2.70126	5.08	0.82502	5.08	99.6169	5.08	52.2492	5.08
0.68109	5.49	0.06818	5.49	0.76793	5.49	2.70129	5.49	0.82506	5.49	99.6645	5.49	52.2539	5.49
0.6811	5.55	0.06819	5.55	0.76796	5.55	2.7013	5.55	0.82507	5.55	99.675	5.55	52.2577	5.55
0.68119	5.72	0.0682	5.72	0.76798	5.72	2.70143	5.72	0.82508	5.72	99.7215	5.72	52.2588	5.72
0.68137	5.4	0.06821	5.4	0.768	5.4	2.70171	5.4	0.82514	5.4	99.7527	5.4	52.2606	5.4
0.68138	5.64	0.06822	5.64	0.76801	5.64	2.70182	5.64	0.82514	5.64	99.7704	5.64	52.2679	5.64
0.68157	5.25	0.06822	5.25	0.76803	5.25	2.70189	5.25	0.82514	5.25	99.7836	5.25	52.2685	5.25
0.68179	5.47	0.06823	5.47	0.76804	5.47	2.702	5.47	0.82516	5.47	99.7953	5.47	52.2721	5.47
0.6818	5.55	0.06824	5.55	0.76806	5.55	2.70207	5.55	0.82519	5.55	99.8249	5.55	52.2736	5.55
0.68188	5.6	0.06825	5.6	0.76806	5.6	2.70225	5.6	0.82523	5.6	99.8291	5.6	52.2768	5.6
0.68211	5.5	0.06825	5.5	0.7681	5.5	2.70226	5.5	0.82524	5.5	99.838	5.5	52.2846	5.5
0.68224	5.27	0.06825	5.27	0.76814	5.27	2.7023	5.27	0.82533	5.27	99.8478	5.27	52.2879	5.27
0.68237	5.41	0.06825	5.41	0.76819	5.41	2.70239	5.41	0.8254	5.41	99.8551	5.41	52.2883	5.41
0.68258	5.7	0.06825	5.7	0.76819	5.7	2.7024	5.7	0.82545	5.7	99.8592	5.7	52.2899	5.7
0.68268	5.84	0.06826	5.84	0.76823	5.84	2.70252	5.84	0.82546	5.84	99.8599	5.84	52.2917	5.84
0.68278	5.27	0.06826	5.27	0.76824	5.27	2.70256	5.27	0.82547	5.27	99.8628	5.27	52.2935	5.27
0.6828	5.5	0.06827	5.5	0.76824	5.5	2.70287	5.5	0.82552	5.5	99.886	5.5	52.302	5.5
0.68308	5.42	0.06827	5.42	0.76826	5.42	2.70288	5.42	0.82553	5.42	99.9007	5.42	52.3023	5.42
0.68322	5.54	0.06828	5.54	0.76826	5.54	2.70288	5.54	0.82565	5.54	99.9054	5.54	52.3084	5.54
0.68378	5.47	0.06828	5.47	0.76827	5.47	2.70319	5.47	0.82568	5.47	99.9129	5.47	52.313	5.47
0.68392	5.88	0.06828	5.88	0.76829	5.88	2.70319	5.88	0.8257	5.88	99.9172	5.88	52.3141	5.88
0.68404	5.33	0.06829	5.33	0.76829	5.33	2.70325	5.33	0.82577	5.33	99.958	5.33	52.3218	5.33
0.68404	5.69	0.0683	5.69	0.7683	5.69	2.70342	5.69	0.82589	5.69	100.007	5.69	52.3246	5.69
0.68405	5.26	0.06831	5.26	0.76831	5.26	2.70377	5.26	0.82597	5.26	100.033	5.26	52.3252	5.26
0.68407	5.57	0.06831	5.57	0.76833	5.57	2.70383	5.57	0.82598	5.57	100.044	5.57	52.3394	5.57
0.68412	5.59	0.06832	5.59	0.76833	5.59	2.70388	5.59	0.82627	5.59	100.062	5.59	52.3424	5.59
0.68429	5.49	0.06832	5.49	0.76836	5.49	2.7041	5.49	0.82629	5.49	100.145	5.49	52.3424	5.49
0.68429	5.57	0.06833	5.57	0.76839	5.57	2.70422	5.57	0.8263	5.57	100.147	5.57	52.3506	5.57
0.6843	5.5	0.06834	5.5	0.76841	5.5	2.7044	5.5	0.82635	5.5	100.164	5.5	52.3528	5.5
0.68433	5.67	0.06834	5.67	0.76844	5.67	2.70496	5.67	0.82637	5.67	100.229	5.67	52.3557	5.67
0.68434	5.55	0.06834	5.55	0.7685	5.55	2.70505	5.55	0.82639	5.55	100.241	5.55	52.3585	5.55
0.68435	5.45	0.06834	5.45	0.76852	5.45	2.70509	5.45	0.82643	5.45	100.271	5.45	52.3678	5.45
0.68435	5.75	0.06834	5.75	0.76852	5.75	2.70509	5.75	0.82646	5.75	100.281	5.75	52.3756	5.75
0.68449	5.39	0.06835	5.39	0.76855	5.39	2.70524	5.39	0.82651	5.39	100.324	5.39	52.3757	5.39
0.68453	6.1	0.06837	6.1	0.76856	6.1	2.70524	6.1	0.82652	6.1	100.326	6.1	52.3775	6.1
0.68484	5.7	0.06838	5.7	0.76859	5.7	2.7056	5.7	0.82654	5.7	100.34	5.7	52.3789	5.7
0.68508	5.79	0.0684	5.79	0.76859	5.79	2.70574	5.79	0.82655	5.79	100.356	5.79	52.3812	5.79
0.68512	5.46	0.06841	5.46	0.76859	5.46	2.70604	5.46	0.82657	5.46	100.366	5.46	52.3843	5.46
0.68527	5.38	0.06841	5.38	0.76859	5.38	2.70609	5.38	0.82658	5.38	100.376	5.38	52.3851	5.38
0.68527	5.58	0.06842	5.58	0.7686	5.58	2.70615	5.58	0.82662	5.58	100.418	5.58	52.3858	5.58
0.68529	5.62	0.06842	5.62	0.76862	5.62	2.70628	5.62	0.82663	5.62	100.469	5.62	52.3887	5.62
0.68543	5.41	0.06843	5.41	0.76866	5.41	2.70629	5.41	0.82664	5.41	100.489	5.41	52.3955	5.41
0.68554	5.38	0.06844	5.38	0.76867	5.38	2.70645	5.38	0.82667	5.38	100.511	5.38	52.3967	5.38
0.68572	5.71	0.06845	5.71	0.76868	5.71	2.70651	5.71	0.82669	5.71	100.547	5.71	52.4006	5.71
0.68588	5.22	0.06846	5.22	0.76869	5.22	2.70657	5.22	0.82673	5.22	100.557	5.22	52.4049	5.22
0.68596	5.72	0.06846	5.72	0.7687	5.72	2.70662	5.72	0.82675	5.72	100.569	5.72	52.4077	5.72
0.68599	5.5	0.06847	5.5	0.76872	5.5	2.70671	5.5	0.82676	5.5	100.651	5.5	52.409	5.5
0.6862	5.75	0.06847	5.75	0.76873	5.75	2.70687	5.75	0.8268	5.75	100.654	5.75	52.4142	5.75
0.68675	5.7	0.06847	5.7	0.76874	5.7	2.70691	5.7	0.82682	5.7	100.663	5.7	52.4142	5.7
0.6868	5.75	0.06847	5.75	0.76875	5.75	2.707	5.75	0.82686	5.75	100.666	5.75	52.4154	5.75
0.68685	5.64	0.06848	5.64	0.76877	5.64	2.70723	5.64	0.82698	5.64	100.675	5.64	52.423	5.64
0.68689	5.44	0.06849	5.44	0.76878	5.44	2.70725	5.44	0.82699	5.44	100.705	5.44	52.4318	5.44
0.68696	5.47	0.06852	5.47	0.7688	5.47	2.70731	5.47	0.827	5.47	100.711	5.47	52.4388	5.47
0.68699	5.48	0.06852	5.48	0.76882	5.48	2.70758	5.48	0.82702	5.48	100.747	5.48	52.4389	5.48
0.68705	5.39	0.06853	5.39	0.76883	5.39	2.70762	5.39	0.82702	5.39	100.761	5.39	52.44	5.39
0.68714	5.29	0.06854	5.29	0.76883	5.29	2.70798	5.29	0.82707	5.29	100.782	5.29	52.4474	5.29
0.68716	5.8	0.06855	5.8	0.76883	5.8	2.70805	5.8	0.82708	5.8	100.801	5.8	52.4538	5.8
0.68718	5.56	0.06856	5.56	0.76884	5.56	2.70808	5.56	0.82711	5.56	100.811	5.56	52.4586	5.56
0.68729	5.8	0.06856	5.8	0.76886	5.8	2.70809	5.8	0.82715	5.8	100.821	5.8	52.4657	5.8
0.68738	5.53	0.06856	5.53	0.76888	5.53	2.70823	5.53	0.82716	5.53	100.828	5.53	52.4663	5.53
0.68749	5.82	0.06858	5.82	0.76894	5.82	2.70826	5.82	0.82726	5.82	100.834	5.82	52.4673	5.82
0.68751	5.41	0.06858	5.41	0.769	5.41	2.7083	5.41	0.82729	5.41	100.845	5.41	52.4733	5.41
0.68758	5.29	0.0686	5.29	0.76901	5.29	2.7084	5.29	0.8273	5.29	100.858	5.29	52.4745	5.29
0.68769	5.43	0.06861	5.43	0.76902	5.43	2.7085	5.43	0.82747	5.43	100.872	5.43	52.4792	5.43
0.68788	5.56	0.06861	5.56	0.76905	5.56	2.70861	5.56	0.82748	5.56	100.878	5.56	52.4809	5.56
0.68799	5.39	0.06865	5.39	0.76905	5.39	2.70864	5.39	0.82753	5.39	100.883	5.39	52.4892	5.39
0.688	5.6	0.06866	5.6	0.76908	5.6	2.70865	5.6	0.82754	5.6	100.897	5.6	52.4926	5.6
0.68822	5.33	0.06869	5.33	0.7691	5.33	2.70878	5.33	0.82776	5.33	100.931	5.33	52.4934	5.33
0.6883	5.54	0.06869	5.54	0.7691	5.54	2.70885	5.54	0.82781	5.54	100.944	5.54	52.4949	5.54
0.68834	5.28	0.0687	5.28	0.7691	5.28	2.70905	5.28	0.82789	5.28	101.113	5.28	52.5006	5.28
0.68839	5.16	0.06872	5.16	0.76911	5.16	2.70913	5.16	0.82792	5.16	101.132	5.16	52.5027	5.16
0.68849	5.52	0.06873	5.52	0.76912	5.52	2.70922	5.52	0.82797	5.52	101.16	5.52	52.5055	5.52
0.68851	5.48	0.06875	5.48	0.76913	5.48	2.70956	5.48	0.82808	5.48	101.168	5.48	52.5069	5.48
0.6886	5.75	0.06875	5.75	0.76914	5.75	2.70992	5.75	0.82815	5.75	101.173	5.75	52.5076	5.75
0.68863	5.43	0.06875	5.43	0.76914	5.43	2.70997	5.43	0.82822	5.43	101.178	5.43	52.5125	5.43
0.68873	5.16	0.06875	5.16	0.76916	5.16	2.71013	5.16	0.82831	5.16	101.192	5.16	52.5125	5.16
0.68884	5.39	0.06875	5.39	0.76916	5.39	2.71015	5.39	0.82834	5.39	101.194	5.39	52.5187	5.39
0.68889	5.63	0.06875	5.63	0.76918	5.63	2.71029	5.63	0.82836	5.63	101.208	5.63	52.5229	5.63
0.6889	5.73	0.06875	5.73	0.76919	5.73	2.71047	5.73	0.82837	5.73	101.223	5.73	52.5246	5.73
0.68909	5.49	0.06875	5.49	0.76919	5.49	2.7106	5.49	0.82847	5.49	101.228	5.49	52.5248	5.49
0.68919	5.59	0.06876	5.59	0.7692	5.59	2.71068	5.59	0.82847	5.59	101.253	5.59	52.526	5.59
0.68922	6.08	0.06877	6.08	0.76925	6.08	2.71069	6.08	0.82848	6.08	101.279	6.08	52.528	6.08
0.68934	5.54	0.06877	5.54	0.76926	5.54	2.71089	5.54	0.82852	5.54	101.28	5.54	52.5285	5.54
0.68959	5.68	0.06878	5.68	0.76927	5.68	2.71101	5.68	0.82854	5.68	101.296	5.68	52.5308	5.68
0.68965	5.31	0.06879	5.31	0.7693	5.31	2.71109	5.31	0.82858	5.31	101.321	5.31	52.5321	5.31
0.68965	5.41	0.0688	5.41	0.76932	5.41	2.71114	5.41	0.82868	5.41	101.333	5.41	52.5398	5.41
0.68979	5.77	0.06882	5.77	0.76933	5.77	2.71128	5.77	0.82888	5.77	101.351	5.77	52.5417	5.77
0.68986	5.67	0.06883	5.67	0.76934	5.67	2.71131	5.67	0.82892	5.67	101.367	5.67	52.5429	5.67
0.68998	5.53	0.06883	5.53	0.76936	5.53	2.71157	5.53	0.82894	5.53	101.419	5.53	52.5444	5.53
0.69002	5.38	0.06883	5.38	0.76938	5.38	2.71183	5.38	0.82894	5.38	101.42	5.38	52.5451	5.38
0.69054	5.6	0.06888	5.6	0.76939	5.6	2.71203	5.6	0.82903	5.6	101.427	5.6	52.5474	5.6
0.6906	5.64	0.06888	5.64	0.76943	5.64	2.71205	5.64	0.82905	5.64	101.441	5.64	52.5478	5.64
0.69063	5.54	0.06888	5.54	0.76945	5.54	2.71237	5.54	0.82909	5.54	101.496	5.54	52.5486	5.54
0.69075	5.15	0.06889	5.15	0.76946	5.15	2.71257	5.15	0.8292	5.15	101.505	5.15	52.5535	5.15
0.69094	5.4	0.06891	5.4	0.76947	5.4	2.71258	5.4	0.82921	5.4	101.515	5.4	52.5586	5.4
0.69107	5.67	0.06892	5.67	0.76947	5.67	2.71273	5.67	0.82932	5.67	101.544	5.67	52.5647	5.67
0.69107	5.7	0.06894	5.7	0.76948	5.7	2.713	5.7	0.82935	5.7	101.578	5.7	52.5702	5.7
0.69114	5.82	0.06896	5.82	0.76948	5.82	2.713	5.82	0.82935	5.82	101.579	5.82	52.575	5.82
0.69133	5.43	0.06897	5.43	0.76952	5.43	2.71306	5.43	0.82942	5.43	101.606	5.43	52.5773	5.43
0.69134	5.68	0.06898	5.68	0.76956	5.68	2.71312	5.68	0.82946	5.68	101.613	5.68	52.5864	5.68
0.69146	5.57	0.06898	5.57	0.76961	5.57	2.71312	5.57	0.82953	5.57	101.649	5.57	52.5883	5.57
0.69152	5.76	0.06899	5.76	0.76962	5.76	2.71322	5.76	0.82959	5.76	101.657	5.76	52.5907	5.76
0.69154	5.4	0.069	5.4	0.76962	5.4	2.71325	5.4	0.82968	5.4	101.663	5.4	52.592	5.4
0.69171	5.91	0.069	5.91	0.76963	5.91	2.71357	5.91	0.82968	5.91	101.668	5.91	52.5949	5.91
0.69188	5.4	0.06901	5.4	0.76963	5.4	2.71358	5.4	0.82971	5.4	101.675	5.4	52.5973	5.4
0.69189	5.57	0.06901	5.57	0.76963	5.57	2.71361	5.57	0.82975	5.57	101.682	5.57	52.5973	5.57
0.69205	5.14	0.06902	5.14	0.76964	5.14	2.71381	5.14	0.82976	5.14	101.699	5.14	52.6015	5.14
0.69206	5.11	0.06902	5.11	0.76964	5.11	2.71412	5.11	0.82978	5.11	101.716	5.11	52.6021	5.11
0.69236	5.65	0.06904	5.65	0.76968	5.65	2.71412	5.65	0.82986	5.65	101.717	5.65	52.6047	5.65
0.69254	5.65	0.06905	5.65	0.76969	5.65	2.71418	5.65	0.82986	5.65	101.786	5.65	52.6062	5.65
0.69268	5.76	0.06906	5.76	0.7697	5.76	2.7142	5.76	0.82986	5.76	101.787	5.76	52.6086	5.76
0.69275	5.3	0.06906	5.3	0.76972	5.3	2.71443	5.3	0.82986	5.3	101.792	5.3	52.6158	5.3
0.69279	5.63	0.06906	5.63	0.76972	5.63	2.71448	5.63	0.82996	5.63	101.808	5.63	52.6224	5.63
0.69295	5.62	0.06909	5.62	0.76975	5.62	2.71457	5.62	0.83013	5.62	101.815	5.62	52.6293	5.62
0.69304	5.69	0.0691	5.69	0.76979	5.69	2.71467	5.69	0.83033	5.69	101.825	5.69	52.6303	5.69
0.69307	5.64	0.0691	5.64	0.76982	5.64	2.71476	5.64	0.83049	5.64	101.836	5.64	52.6313	5.64
0.69328	5.45	0.06911	5.45	0.76982	5.45	2.71488	5.45	0.8305	5.45	101.85	5.45	52.6353	5.45
0.69334	5.34	0.06912	5.34	0.76983	5.34	2.71507	5.34	0.83058	5.34	101.863	5.34	52.6416	5.34
0.69339	5.26	0.06914	5.26	0.76988	5.26	2.71513	5.26	0.83058	5.26	101.867	5.26	52.6423	5.26
0.6934	5.37	0.06915	5.37	0.76992	5.37	2.71513	5.37	0.83062	5.37	101.875	5.37	52.6441	5.37
0.69358	5.75	0.06916	5.75	0.76996	5.75	2.71529	5.75	0.83064	5.75	101.877	5.75	52.6556	5.75
0.69371	5.59	0.06916	5.59	0.76997	5.59	2.71554	5.59	0.83072	5.59	101.877	5.59	52.6565	5.59
0.69379	5.18	0.06916	5.18	0.76999	5.18	2.71597	5.18	0.83073	5.18	101.879	5.18	52.6609	5.18
0.69391	5.28	0.06916	5.28	0.77002	5.28	2.71603	5.28	0.83074	5.28	101.882	5.28	52.6609	5.28
0.69396	5.81	0.06917	5.81	0.77003	5.81	2.7161	5.81	0.83082	5.81	101.91	5.81	52.6743	5.81
0.69405	5.49	0.06917	5.49	0.77003	5.49	2.71614	5.49	0.83092	5.49	101.921	5.49	52.6782	5.49
0.69433	5.64	0.06918	5.64	0.77006	5.64	2.7162	5.64	0.83094	5.64	101.924	5.64	52.681	5.64
0.69444	5.45	0.06918	5.45	0.7701	5.45	2.71622	5.45	0.83097	5.45	101.948	5.45	52.6885	5.45
0.69476	5.27	0.06918	5.27	0.7701	5.27	2.71647	5.27	0.831	5.27	101.954	5.27	52.6891	5.27
0.69481	5.76	0.06919	5.76	0.77011	5.76	2.71702	5.76	0.83115	5.76	101.964	5.76	52.6901	5.76
0.69483	5.51	0.0692	5.51	0.77014	5.51	2.71707	5.51	0.83126	5.51	101.966	5.51	52.6904	5.51
0.69498	5.27	0.06922	5.27	0.77017	5.27	2.71728	5.27	0.83126	5.27	101.971	5.27	52.6906	5.27
0.69548	5.78	0.06923	5.78	0.77024	5.78	2.71753	5.78	0.83129	5.78	101.972	5.78	52.6929	5.78
0.69563	5.67	0.06923	5.67	0.77024	5.67	2.71755	5.67	0.83134	5.67	101.973	5.67	52.6939	5.67
0.69566	5.57	0.06923	5.57	0.77028	5.57	2.71796	5.57	0.83138	5.57	101.973	5.57	52.6949	5.57
0.69591	5.79	0.06923	5.79	0.7703	5.79	2.71805	5.79	0.83145	5.79	101.988	5.79	52.699	5.79
0.69598	5.51	0.06925	5.51	0.7703	5.51	2.71828	5.51	0.83146	5.51	101.99	5.51	52.7033	5.51
0.69598	5.51	0.06927	5.51	0.77032	5.51	2.71837	5.51	0.83149	5.51	101.997	5.51	52.7085	5.51
0.69613	5.56	0.06928	5.56	0.77034	5.56	2.71843	5.56	0.83161	5.56	102.007	5.56	52.7121	5.56
0.6962	5.27	0.06929	5.27	0.77034	5.27	2.7185	5.27	0.83165	5.27	102.018	5.27	52.7137	5.27
0.69621	5.43	0.0693	5.43	0.77037	5.43	2.71854	5.43	0.83172	5.43	102.021	5.43	52.7154	5.43
0.69632	5.63	0.0693	5.63	0.7704	5.63	2.71865	5.63	0.83172	5.63	102.023	5.63	52.7195	5.63
0.69651	5.61	0.0693	5.61	0.77046	5.61	2.71893	5.61	0.83174	5.61	102.025	5.61	52.7234	5.61
0.69656	5.69	0.06931	5.69	0.77049	5.69	2.71909	5.69	0.83174	5.69	102.028	5.69	52.7269	5.69
0.6966	5.75	0.06931	5.75	0.77051	5.75	2.7191	5.75	0.8318	5.75	102.039	5.75	52.7285	5.75
0.69668	5.41	0.06931	5.41	0.77051	5.41	2.71915	5.41	0.83181	5.41	102.043	5.41	52.7296	5.41
0.69672	5.67	0.06932	5.67	0.77051	5.67	2.71915	5.67	0.83184	5.67	102.045	5.67	52.7311	5.67
0.69676	5.67	0.06932	5.67	0.77052	5.67	2.71928	5.67	0.83185	5.67	102.049	5.67	52.7353	5.67
0.69717	5.39	0.06932	5.39	0.77053	5.39	2.7194	5.39	0.83206	5.39	102.064	5.39	52.7389	5.39
0.6972	5.8	0.06934	5.8	0.77054	5.8	2.71972	5.8	0.8321	5.8	102.077	5.8	52.7427	5.8
0.69727	5.65	0.06935	5.65	0.77063	5.65	2.71984	5.65	0.83213	5.65	102.084	5.65	52.7515	5.65
0.69743	5.37	0.06936	5.37	0.77065	5.37	2.72004	5.37	0.83213	5.37	102.098	5.37	52.755	5.37
0.69769	5.62	0.06936	5.62	0.7707	5.62	2.72018	5.62	0.83219	5.62	102.103	5.62	52.7637	5.62
0.69807	5.51	0.06936	5.51	0.77072	5.51	2.72025	5.51	0.83221	5.51	102.106	5.51	52.7645	5.51
0.69821	5.53	0.06937	5.53	0.77072	5.53	2.7204	5.53	0.83221	5.53	102.122	5.53	52.7667	5.53
0.69847	5.96	0.06937	5.96	0.77072	5.96	2.72062	5.96	0.83223	5.96	102.125	5.96	52.7698	5.96
0.69856	5.31	0.06937	5.31	0.77073	5.31	2.72066	5.31	0.83228	5.31	102.127	5.31	52.7722	5.31
0.69861	5.35	0.06937	5.35	0.77073	5.35	2.72069	5.35	0.83229	5.35	102.128	5.35	52.7768	5.35
0.69869	5.35	0.06937	5.35	0.77074	5.35	2.72092	5.35	0.83231	5.35	102.13	5.35	52.7774	5.35
0.69874	5.65	0.06939	5.65	0.77075	5.65	2.72098	5.65	0.83232	5.65	102.141	5.65	52.7776	5.65
0.69883	5.87	0.0694	5.87	0.77076	5.87	2.72113	5.87	0.83237	5.87	102.149	5.87	52.7803	5.87
0.69884	5.17	0.0694	5.17	0.77076	5.17	2.72126	5.17	0.8324	5.17	102.155	5.17	52.7808	5.17
0.6989	5.55	0.0694	5.55	0.7708	5.55	2.72127	5.55	0.83242	5.55	102.158	5.55	52.781	5.55
0.69917	5.73	0.06941	5.73	0.7708	5.73	2.72132	5.73	0.83244	5.73	102.174	5.73	52.7823	5.73
0.69947	5.9	0.06944	5.9	0.77082	5.9	2.72138	5.9	0.83249	5.9	102.188	5.9	52.7853	5.9
0.69947	5.44	0.06944	5.44	0.77082	5.44	2.72171	5.44	0.83249	5.44	102.206	5.44	52.7868	5.44
0.69957	5.36	0.06945	5.36	0.77082	5.36	2.72178	5.36	0.83253	5.36	102.211	5.36	52.7892	5.36
0.69962	5.53	0.06946	5.53	0.77083	5.53	2.72181	5.53	0.83261	5.53	102.223	5.53	52.7893	5.53
0.69966	5.32	0.06947	5.32	0.77084	5.32	2.7219	5.32	0.83263	5.32	102.224	5.32	52.7943	5.32
0.69969	5.75	0.06948	5.75	0.77086	5.75	2.7221	5.75	0.8327	5.75	102.227	5.75	52.7959	5.75
0.69983	5.51	0.06949	5.51	0.77087	5.51	2.7224	5.51	0.83276	5.51	102.235	5.51	52.8017	5.51
0.69993	5.88	0.06949	5.88	0.77092	5.88	2.72252	5.88	0.83291	5.88	102.239	5.88	52.804	5.88
0.69995	5.49	0.06949	5.49	0.77094	5.49	2.72255	5.49	0.83295	5.49	102.241	5.49	52.8063	5.49
0.69999	5.61	0.0695	5.61	0.77095	5.61	2.72264	5.61	0.83297	5.61	102.242	5.61	52.8076	5.61
0.70033	5.39	0.06951	5.39	0.77096	5.39	2.72279	5.39	0.83306	5.39	102.26	5.39	52.8093	5.39
0.7004	5.54	0.06951	5.54	0.77099	5.54	2.72285	5.54	0.83313	5.54	102.264	5.54	52.8142	5.54
0.70051	5.74	0.06952	5.74	0.771	5.74	2.72288	5.74	0.83325	5.74	102.285	5.74	52.8158	5.74
0.70059	5.62	0.06952	5.62	0.77101	5.62	2.72292	5.62	0.83329	5.62	102.29	5.62	52.8161	5.62
0.70079	5.26	0.06953	5.26	0.77102	5.26	2.72295	5.26	0.83338	5.26	102.294	5.26	52.8198	5.26
0.70087	5.55	0.06953	5.55	0.77103	5.55	2.7234	5.55	0.83353	5.55	102.296	5.55	52.8235	5.55
0.70091	5.27	0.06953	5.27	0.77105	5.27	2.72344	5.27	0.83357	5.27	102.302	5.27	52.8251	5.27
0.70122	5.58	0.06955	5.58	0.77105	5.58	2.72349	5.58	0.83358	5.58	102.302	5.58	52.8252	5.58
0.70123	5.32	0.06955	5.32	0.77106	5.32	2.72358	5.32	0.8336	5.32	102.307	5.32	52.835	5.32
0.70131	5.23	0.06956	5.23	0.77107	5.23	2.7236	5.23	0.83362	5.23	102.309	5.23	52.8388	5.23
0.70162	5.72	0.06956	5.72	0.77108	5.72	2.7236	5.72	0.8337	5.72	102.31	5.72	52.8419	5.72
0.70168	5.69	0.06957	5.69	0.77109	5.69	2.72375	5.69	0.8337	5.69	102.313	5.69	52.8434	5.69
0.70176	5.39	0.06958	5.39	0.77112	5.39	2.72395	5.39	0.83382	5.39	102.314	5.39	52.8448	5.39
0.70188	5.65	0.06959	5.65	0.77114	5.65	2.72426	5.65	0.8339	5.65	102.318	5.65	52.8559	5.65
0.7019	5.56	0.06961	5.56	0.77114	5.56	2.72434	5.56	0.8339	5.56	102.325	5.56	52.856	5.56
0.70213	5.5	0.06961	5.5	0.77115	5.5	2.72456	5.5	0.83394	5.5	102.329	5.5	52.8572	5.5
0.70223	5.67	0.06962	5.67	0.77117	5.67	2.72458	5.67	0.83399	5.67	102.329	5.67	52.8577	5.67
0.70224	5.21	0.06964	5.21	0.77118	5.21	2.72462	5.21	0.83406	5.21	102.332	5.21	52.8685	5.21
0.70232	5.42	0.06965	5.42	0.7712	5.42	2.72464	5.42	0.83415	5.42	102.339	5.42	52.8693	5.42
0.70269	5.92	0.06965	5.92	0.77121	5.92	2.72466	5.92	0.83424	5.92	102.343	5.92	52.8706	5.92
0.70275	5.73	0.06966	5.73	0.77123	5.73	2.72482	5.73	0.83434	5.73	102.344	5.73	52.8715	5.73
0.70286	5.91	0.06966	5.91	0.77125	5.91	2.72484	5.91	0.83434	5.91	102.349	5.91	52.8737	5.91
0.70289	5.95	0.06967	5.95	0.77126	5.95	2.72499	5.95	0.83437	5.95	102.354	5.95	52.8739	5.95
0.70295	5.29	0.06967	5.29	0.77126	5.29	2.72508	5.29	0.83441	5.29	102.362	5.29	52.88	5.29
0.7031	5.58	0.06968	5.58	0.77132	5.58	2.72508	5.58	0.83445	5.58	102.362	5.58	52.8802	5.58
0.70318	5.72	0.06969	5.72	0.7714	5.72	2.72518	5.72	0.83449	5.72	102.388	5.72	52.8832	5.72
0.7032	5.44	0.06969	5.44	0.77141	5.44	2.72523	5.44	0.83453	5.44	102.395	5.44	52.8835	5.44
0.70322	5.6	0.0697	5.6	0.77142	5.6	2.72553	5.6	0.83464	5.6	102.41	5.6	52.884	5.6
0.70329	5.49	0.06971	5.49	0.77154	5.49	2.72558	5.49	0.83464	5.49	102.414	5.49	52.8875	5.49
0.70339	5.49	0.06972	5.49	0.77154	5.49	2.72567	5.49	0.83467	5.49	102.419	5.49	52.8889	5.49
0.70348	5.49	0.06974	5.49	0.77156	5.49	2.72592	5.49	0.8347	5.49	102.422	5.49	52.8916	5.49
0.70348	5.73	0.06974	5.73	0.77156	5.73	2.72595	5.73	0.83479	5.73	102.423	5.73	52.893	5.73
0.7035	5.7	0.06977	5.7	0.77161	5.7	2.72596	5.7	0.8349	5.7	102.432	5.7	52.901	5.7
0.7037	5.6	0.06977	5.6	0.77165	5.6	2.72598	5.6	0.83491	5.6	102.437	5.6	52.9017	5.6
0.70394	5.64	0.06978	5.64	0.77166	5.64	2.72608	5.64	0.83494	5.64	102.437	5.64	52.9086	5.64
0.70423	5.54	0.06981	5.54	0.77167	5.54	2.72611	5.54	0.83494	5.54	102.443	5.54	52.9141	5.54
0.70429	5.34	0.06981	5.34	0.77174	5.34	2.72636	5.34	0.83502	5.34	102.444	5.34	52.9158	5.34
0.70434	5.69	0.06983	5.69	0.77176	5.69	2.72668	5.69	0.83509	5.69	102.445	5.69	52.9174	5.69
0.70436	5.5	0.06988	5.5	0.77177	5.5	2.72673	5.5	0.83521	5.5	102.457	5.5	52.9229	5.5
0.70449	5.55	0.06988	5.55	0.77177	5.55	2.72682	5.55	0.83522	5.55	102.459	5.55	52.9243	5.55
0.70457	5.33	0.06989	5.33	0.7718	5.33	2.72721	5.33	0.83523	5.33	102.462	5.33	52.9306	5.33
0.7046	5.22	0.06989	5.22	0.7718	5.22	2.72726	5.22	0.83524	5.22	102.469	5.22	52.9313	5.22
0.70463	5.63	0.0699	5.63	0.77183	5.63	2.72748	5.63	0.83526	5.63	102.47	5.63	52.9382	5.63
0.70477	5.45	0.0699	5.45	0.77185	5.45	2.72753	5.45	0.83542	5.45	102.473	5.45	52.9449	5.45
0.70531	5.49	0.06991	5.49	0.7719	5.49	2.72758	5.49	0.83544	5.49	102.475	5.49	52.9487	5.49
0.70552	5.86	0.06992	5.86	0.77192	5.86	2.72765	5.86	0.83545	5.86	102.478	5.86	52.9487	5.86
0.70558	5.42	0.06992	5.42	0.77192	5.42	2.72765	5.42	0.8357	5.42	102.481	5.42	52.9571	5.42
0.7057	5.61	0.06994	5.61	0.77195	5.61	2.72767	5.61	0.83584	5.61	102.484	5.61	52.9634	5.61
0.70593	5.54	0.06996	5.54	0.77196	5.54	2.72788	5.54	0.83586	5.54	102.489	5.54	52.9638	5.54
0.70605	5.51	0.06997	5.51	0.77197	5.51	2.72804	5.51	0.83586	5.51	102.496	5.51	52.9651	5.51
0.70623	5.33	0.06999	5.33	0.77198	5.33	2.72816	5.33	0.83588	5.33	102.497	5.33	52.9663	5.33
0.70627	5.64	0.06999	5.64	0.772	5.64	2.72843	5.64	0.83588	5.64	102.508	5.64	52.9678	5.64
0.70631	5.45	0.07	5.45	0.77204	5.45	2.72851	5.45	0.83595	5.45	102.511	5.45	52.9682	5.45
0.70648	5.6	0.07	5.6	0.77207	5.6	2.72885	5.6	0.83596	5.6	102.518	5.6	52.9726	5.6
0.70651	5.5	0.07	5.5	0.77208	5.5	2.72908	5.5	0.83601	5.5	102.519	5.5	52.975	5.5
0.70652	5.25	0.07001	5.25	0.77212	5.25	2.72932	5.25	0.83614	5.25	102.529	5.25	52.9757	5.25
0.70665	5.55	0.07002	5.55	0.77215	5.55	2.72938	5.55	0.83614	5.55	102.53	5.55	52.9764	5.55
0.70686	5.24	0.07003	5.24	0.77218	5.24	2.72946	5.24	0.83616	5.24	102.53	5.24	52.9774	5.24
0.70692	5.88	0.07003	5.88	0.77219	5.88	2.72951	5.88	0.83625	5.88	102.55	5.88	52.983	5.88
0.70705	5.65	0.07004	5.65	0.77221	5.65	2.72958	5.65	0.83627	5.65	102.552	5.65	52.9841	5.65
0.7071	5.38	0.07005	5.38	0.77223	5.38	2.72959	5.38	0.83629	5.38	102.556	5.38	52.9859	5.38
0.70716	5.6	0.07006	5.6	0.77224	5.6	2.72975	5.6	0.83631	5.6	102.556	5.6	52.991	5.6
0.70754	5.91	0.07006	5.91	0.77227	5.91	2.72995	5.91	0.83631	5.91	102.557	5.91	52.9926	5.91
0.70756	5.62	0.07006	5.62	0.77227	5.62	2.73003	5.62	0.83631	5.62	102.563	5.62	52.9931	5.62
0.70758	5.5	0.07008	5.5	0.77229	5.5	2.73007	5.5	0.83633	5.5	102.567	5.5	52.9936	5.5
0.70759	5.56	0.07008	5.56	0.77231	5.56	2.73012	5.56	0.83641	5.56	102.568	5.56	52.9989	5.56
0.70793	5.47	0.0701	5.47	0.77232	5.47	2.73042	5.47	0.83649	5.47	102.569	5.47	53.0029	5.47
0.70798	5.51	0.07011	5.51	0.77234	5.51	2.73057	5.51	0.83652	5.51	102.57	5.51	53.0053	5.51
0.70809	5.41	0.07012	5.41	0.77235	5.41	2.73058	5.41	0.83652	5.41	102.57	5.41	53.0078	5.41
0.70817	5.08	0.07012	5.08	0.77239	5.08	2.73061	5.08	0.83662	5.08	102.573	5.08	53.0086	5.08
0.70831	5.23	0.07012	5.23	0.77239	5.23	2.73089	5.23	0.83664	5.23	102.573	5.23	53.0102	5.23
0.70853	5.42	0.07013	5.42	0.77244	5.42	2.73091	5.42	0.83666	5.42	102.577	5.42	53.0128	5.42
0.70862	5.75	0.07014	5.75	0.77247	5.75	2.73114	5.75	0.83671	5.75	102.578	5.75	53.0146	5.75
0.70881	5.48	0.07015	5.48	0.77247	5.48	2.73115	5.48	0.83672	5.48	102.584	5.48	53.02	5.48
0.70894	5.52	0.07015	5.52	0.77249	5.52	2.73172	5.52	0.83677	5.52	102.589	5.52	53.0279	5.52
0.70901	5.45	0.07016	5.45	0.77253	5.45	2.73201	5.45	0.83678	5.45	102.591	5.45	53.0287	5.45
0.70919	5.46	0.07017	5.46	0.77256	5.46	2.73202	5.46	0.83682	5.46	102.596	5.46	53.0294	5.46
0.70929	5.85	0.07017	5.85	0.77257	5.85	2.73205	5.85	0.83689	5.85	102.599	5.85	53.0299	5.85
0.70939	5.57	0.07018	5.57	0.77258	5.57	2.7322	5.57	0.83693	5.57	102.609	5.57	53.0346	5.57
0.70947	5.57	0.07018	5.57	0.77258	5.57	2.73224	5.57	0.83698	5.57	102.611	5.57	53.0358	5.57
0.70957	5.7	0.07019	5.7	0.77261	5.7	2.73234	5.7	0.83705	5.7	102.613	5.7	53.0404	5.7
0.70959	5.82	0.07021	5.82	0.77261	5.82	2.7325	5.82	0.83705	5.82	102.623	5.82	53.0409	5.82
0.70965	5.33	0.07023	5.33	0.77262	5.33	2.73271	5.33	0.83715	5.33	102.624	5.33	53.0431	5.33
0.71003	5.45	0.07023	5.45	0.77262	5.45	2.73271	5.45	0.8372	5.45	102.637	5.45	53.0489	5.45
0.71019	5.6	0.07024	5.6	0.77262	5.6	2.73293	5.6	0.83724	5.6	102.643	5.6	53.0557	5.6
0.71022	5.38	0.07024	5.38	0.77263	5.38	2.73314	5.38	0.83741	5.38	102.648	5.38	53.0558	5.38
0.71032	5.13	0.07025	5.13	0.77264	5.13	2.73315	5.13	0.83749	5.13	102.655	5.13	53.0599	5.13
0.71034	5.61	0.07025	5.61	0.77265	5.61	2.73319	5.61	0.83764	5.61	102.669	5.61	53.0637	5.61
0.71049	5.52	0.07026	5.52	0.77266	5.52	2.73331	5.52	0.83776	5.52	102.67	5.52	53.0675	5.52
0.71061	5.37	0.07027	5.37	0.77267	5.37	2.73338	5.37	0.83784	5.37	102.671	5.37	53.0687	5.37
0.71063	5.33	0.07027	5.33	0.77268	5.33	2.73348	5.33	0.83784	5.33	102.678	5.33	53.0713	5.33
0.71066	5.27	0.07027	5.27	0.77269	5.27	2.73374	5.27	0.83785	5.27	102.683	5.27	53.0724	5.27
0.71067	5.59	0.07028	5.59	0.77278	5.59	2.7339	5.59	0.83794	5.59	102.685	5.59	53.0773	5.59
0.7108	5.58	0.07029	5.58	0.77282	5.58	2.73446	5.58	0.83796	5.58	102.685	5.58	53.0798	5.58
0.71095	5.41	0.0703	5.41	0.77286	5.41	2.73457	5.41	0.83797	5.41	102.691	5.41	53.0858	5.41
0.71139	5.26	0.07031	5.26	0.77288	5.26	2.73472	5.26	0.83812	5.26	102.71	5.26	53.0858	5.26
0.71143	5.41	0.07032	5.41	0.77288	5.41	2.73477	5.41	0.83824	5.41	102.713	5.41	53.0869	5.41
0.71144	5.6	0.07032	5.6	0.77289	5.6	2.73509	5.6	0.83825	5.6	102.723	5.6	53.0871	5.6
0.71163	5.26	0.07033	5.26	0.77293	5.26	2.73512	5.26	0.83825	5.26	102.727	5.26	53.0897	5.26
0.71187	5.93	0.07033	5.93	0.77296	5.93	2.73527	5.93	0.83826	5.93	102.729	5.93	53.0904	5.93
0.71206	5.63	0.07034	5.63	0.77298	5.63	2.73533	5.63	0.83828	5.63	102.735	5.63	53.092	5.63
0.71208	5.52	0.07034	5.52	0.77303	5.52	2.73566	5.52	0.83829	5.52	102.751	5.52	53.0922	5.52
0.71208	5.57	0.07037	5.57	0.77304	5.57	2.73566	5.57	0.83833	5.57	102.754	5.57	53.0954	5.57
0.71208	5.44	0.07037	5.44	0.77306	5.44	2.73585	5.44	0.83833	5.44	102.755	5.44	53.0959	5.44
0.71226	5.51	0.07038	5.51	0.77308	5.51	2.73587	5.51	0.83841	5.51	102.766	5.51	53.0976	5.51
0.7123	5.6	0.07038	5.6	0.77309	5.6	2.73587	5.6	0.83845	5.6	102.767	5.6	53.0993	5.6
0.71253	5.88	0.07038	5.88	0.77313	5.88	2.73591	5.88	0.8385	5.88	102.77	5.88	53.1083	5.88
0.71267	5.38	0.07038	5.38	0.77314	5.38	2.73594	5.38	0.83858	5.38	102.776	5.38	53.1132	5.38
0.71269	5.3	0.07038	5.3	0.77315	5.3	2.73595	5.3	0.83858	5.3	102.796	5.3	53.1187	5.3
0.71275	5.64	0.07039	5.64	0.77315	5.64	2.73621	5.64	0.8386	5.64	102.803	5.64	53.1193	5.64
0.71276	5.2	0.07039	5.2	0.77318	5.2	2.7363	5.2	0.83873	5.2	102.813	5.2	53.1213	5.2
0.7128	5.58	0.07039	5.58	0.77318	5.58	2.73631	5.58	0.83884	5.58	102.823	5.58	53.1234	5.58
0.71281	5.37	0.07041	5.37	0.77325	5.37	2.73632	5.37	0.83884	5.37	102.831	5.37	53.1262	5.37
0.71295	5.55	0.07042	5.55	0.77327	5.55	2.73641	5.55	0.83892	5.55	102.835	5.55	53.1283	5.55
0.71309	5.71	0.07045	5.71	0.7733	5.71	2.73641	5.71	0.83896	5.71	102.84	5.71	53.13	5.71
0.71319	5.71	0.07045	5.71	0.77332	5.71	2.73644	5.71	0.83896	5.71	102.84	5.71	53.1318	5.71
0.71333	5.37	0.07047	5.37	0.77334	5.37	2.73651	5.37	0.8391	5.37	102.841	5.37	53.1319	5.37
0.71338	5.49	0.07048	5.49	0.77334	5.49	2.73702	5.49	0.83914	5.49	102.846	5.49	53.1362	5.49
0.71348	5.55	0.07048	5.55	0.77335	5.55	2.73728	5.55	0.83917	5.55	102.848	5.55	53.1364	5.55
0.71358	5.49	0.0705	5.49	0.77336	5.49	2.73731	5.49	0.83927	5.49	102.849	5.49	53.1407	5.49
0.71362	5.85	0.0705	5.85	0.77338	5.85	2.73813	5.85	0.83934	5.85	102.856	5.85	53.1421	5.85
0.71369	5.73	0.07051	5.73	0.7734	5.73	2.73822	5.73	0.83951	5.73	102.864	5.73	53.1449	5.73
0.71371	5.38	0.07053	5.38	0.77345	5.38	2.73836	5.38	0.83958	5.38	102.866	5.38	53.1451	5.38
0.71391	5.32	0.07053	5.32	0.77347	5.32	2.73842	5.32	0.8396	5.32	102.867	5.32	53.1462	5.32
0.71391	5.53	0.07053	5.53	0.77347	5.53	2.73858	5.53	0.83963	5.53	102.868	5.53	53.1518	5.53
0.71415	5.3	0.07054	5.3	0.77347	5.3	2.73878	5.3	0.83963	5.3	102.87	5.3	53.1524	5.3
0.71438	5.69	0.07055	5.69	0.77348	5.69	2.73879	5.69	0.83969	5.69	102.873	5.69	53.1571	5.69
0.71491	5.62	0.07056	5.62	0.7735	5.62	2.73897	5.62	0.8397	5.62	102.878	5.62	53.1606	5.62
0.71494	5.56	0.07057	5.56	0.77353	5.56	2.73914	5.56	0.83984	5.56	102.896	5.56	53.1609	5.56
0.71504	5.81	0.07057	5.81	0.77356	5.81	2.73924	5.81	0.8399	5.81	102.903	5.81	53.1634	5.81
0.71526	5.16	0.07058	5.16	0.77363	5.16	2.73954	5.16	0.83991	5.16	102.907	5.16	53.1637	5.16
0.71544	5.67	0.07058	5.67	0.77366	5.67	2.73957	5.67	0.83992	5.67	102.914	5.67	53.1675	5.67
0.71547	5.54	0.07059	5.54	0.77366	5.54	2.74032	5.54	0.83992	5.54	102.916	5.54	53.1684	5.54
0.7158	5.64	0.07059	5.64	0.77368	5.64	2.74053	5.64	0.83997	5.64	102.933	5.64	53.1695	5.64
0.71583	5.79	0.07059	5.79	0.77379	5.79	2.74063	5.79	0.84009	5.79	102.933	5.79	53.1707	5.79
0.71584	5.62	0.07061	5.62	0.77379	5.62	2.74063	5.62	0.8401	5.62	102.933	5.62	53.1744	5.62
0.71602	5.61	0.07061	5.61	0.77379	5.61	2.74067	5.61	0.84011	5.61	102.951	5.61	53.1793	5.61
0.71615	5.47	0.07061	5.47	0.7738	5.47	2.74075	5.47	0.84011	5.47	102.954	5.47	53.1802	5.47
0.71621	5.66	0.07063	5.66	0.7738	5.66	2.74083	5.66	0.84015	5.66	102.958	5.66	53.1814	5.66
0.71624	5.78	0.07064	5.78	0.7738	5.78	2.74116	5.78	0.8402	5.78	102.96	5.78	53.1822	5.78
0.71637	5.45	0.07064	5.45	0.77385	5.45	2.74142	5.45	0.84025	5.45	102.961	5.45	53.1842	5.45
0.71702	5.69	0.07065	5.69	0.77389	5.69	2.7417	5.69	0.84026	5.69	102.964	5.69	53.1881	5.69
0.71703	5.53	0.07068	5.53	0.77391	5.53	2.74187	5.53	0.84037	5.53	102.972	5.53	53.1903	5.53
0.7173	5.56	0.07068	5.56	0.77391	5.56	2.74193	5.56	0.84038	5.56	102.975	5.56	53.1916	5.56
0.71739	5.61	0.0707	5.61	0.77392	5.61	2.74219	5.61	0.84047	5.61	102.975	5.61	53.1923	5.61
0.71772	5.76	0.07072	5.76	0.774	5.76	2.74228	5.76	0.84047	5.76	102.987	5.76	53.1933	5.76
0.7178	5.43	0.07073	5.43	0.77401	5.43	2.74237	5.43	0.84056	5.43	102.993	5.43	53.2099	5.43
0.71781	5.61	0.07073	5.61	0.77401	5.61	2.74244	5.61	0.84056	5.61	103	5.61	53.2164	5.61
0.71784	5.56	0.07074	5.56	0.77401	5.56	2.74249	5.56	0.84058	5.56	103.002	5.56	53.2193	5.56
0.7179	5.59	0.07074	5.59	0.77403	5.59	2.74279	5.59	0.84059	5.59	103.016	5.59	53.2215	5.59
0.71808	5.81	0.07075	5.81	0.77403	5.81	2.7429	5.81	0.84062	5.81	103.019	5.81	53.2241	5.81
0.71817	5.93	0.07076	5.93	0.77407	5.93	2.74295	5.93	0.84064	5.93	103.02	5.93	53.2304	5.93
0.71824	5.63	0.07076	5.63	0.77411	5.63	2.74305	5.63	0.84068	5.63	103.026	5.63	53.2335	5.63
0.71829	5.49	0.07076	5.49	0.77421	5.49	2.74321	5.49	0.84071	5.49	103.029	5.49	53.2349	5.49
0.71829	5.61	0.07077	5.61	0.77421	5.61	2.74331	5.61	0.84076	5.61	103.029	5.61	53.2374	5.61
0.71848	5.47	0.07078	5.47	0.77424	5.47	2.74355	5.47	0.84078	5.47	103.033	5.47	53.2381	5.47
0.7186	5.27	0.07082	5.27	0.77425	5.27	2.74364	5.27	0.8408	5.27	103.051	5.27	53.2389	5.27
0.71875	5.6	0.07084	5.6	0.77434	5.6	2.74365	5.6	0.84106	5.6	103.063	5.6	53.2421	5.6
0.71879	5.38	0.07084	5.38	0.77435	5.38	2.74367	5.38	0.84109	5.38	103.066	5.38	53.2423	5.38
0.71879	5.78	0.07084	5.78	0.77437	5.78	2.74369	5.78	0.84109	5.78	103.076	5.78	53.2439	5.78
0.71897	5.62	0.07085	5.62	0.7744	5.62	2.74371	5.62	0.84112	5.62	103.078	5.62	53.2548	5.62
0.7191	5.33	0.07086	5.33	0.77441	5.33	2.74385	5.33	0.84115	5.33	103.08	5.33	53.255	5.33
0.71911	5.29	0.0709	5.29	0.77442	5.29	2.74385	5.29	0.84121	5.29	103.088	5.29	53.2559	5.29
0.71918	5.38	0.0709	5.38	0.77442	5.38	2.74429	5.38	0.84129	5.38	103.111	5.38	53.261	5.38
0.71926	5.32	0.07091	5.32	0.77444	5.32	2.74444	5.32	0.84131	5.32	103.132	5.32	53.2664	5.32
0.71949	5.58	0.07091	5.58	0.77447	5.58	2.74446	5.58	0.84133	5.58	103.132	5.58	53.2678	5.58
0.71957	5.67	0.07092	5.67	0.77449	5.67	2.74451	5.67	0.84134	5.67	103.134	5.67	53.2707	5.67
0.71969	5.36	0.07092	5.36	0.7745	5.36	2.74462	5.36	0.8414	5.36	103.139	5.36	53.2709	5.36
0.7198	5.57	0.07092	5.57	0.77453	5.57	2.74466	5.57	0.84143	5.57	103.144	5.57	53.2736	5.57
0.71996	5.77	0.07093	5.77	0.77454	5.77	2.7449	5.77	0.84147	5.77	103.148	5.77	53.2749	5.77
0.72015	5.13	0.07094	5.13	0.7746	5.13	2.74507	5.13	0.84151	5.13	103.149	5.13	53.2818	5.13
0.72018	5.62	0.07094	5.62	0.77464	5.62	2.74516	5.62	0.8417	5.62	103.159	5.62	53.2821	5.62
0.72032	5.59	0.07095	5.59	0.77464	5.59	2.74523	5.59	0.84172	5.59	103.161	5.59	53.2846	5.59
0.72038	5.7	0.07096	5.7	0.77466	5.7	2.7453	5.7	0.84175	5.7	103.167	5.7	53.2886	5.7
0.72055	5.65	0.07096	5.65	0.77468	5.65	2.74558	5.65	0.84182	5.65	103.172	5.65	53.2899	5.65
0.7206	5.62	0.07097	5.62	0.77471	5.62	2.74561	5.62	0.84191	5.62	103.182	5.62	53.295	5.62
0.72087	5.62	0.07098	5.62	0.77473	5.62	2.7459	5.62	0.84198	5.62	103.187	5.62	53.2978	5.62
0.72115	5.22	0.071	5.22	0.77474	5.22	2.74594	5.22	0.8421	5.22	103.189	5.22	53.3001	5.22
0.72123	5.5	0.071	5.5	0.77475	5.5	2.74604	5.5	0.84211	5.5	103.198	5.5	53.3012	5.5
0.72126	6	0.07101	6	0.77484	6	2.74608	6	0.84211	6	103.203	6	53.3017	6
0.72129	5.77	0.07102	5.77	0.77484	5.77	2.74609	5.77	0.84217	5.77	103.206	5.77	53.3018	5.77
0.72144	5.48	0.07102	5.48	0.77484	5.48	2.74632	5.48	0.84219	5.48	103.212	5.48	53.3024	5.48
0.72158	5.6	0.07103	5.6	0.77484	5.6	2.74639	5.6	0.84223	5.6	103.221	5.6	53.3072	5.6
0.72171	5.78	0.07104	5.78	0.77485	5.78	2.74651	5.78	0.84228	5.78	103.228	5.78	53.3083	5.78
0.72176	5.37	0.07104	5.37	0.77489	5.37	2.74655	5.37	0.8424	5.37	103.236	5.37	53.3108	5.37
0.72197	5.67	0.07104	5.67	0.77491	5.67	2.74664	5.67	0.84244	5.67	103.236	5.67	53.3135	5.67
0.72202	5.7	0.07108	5.7	0.77493	5.7	2.74677	5.7	0.84252	5.7	103.271	5.7	53.3138	5.7
0.72213	5.63	0.07109	5.63	0.77495	5.63	2.74683	5.63	0.84253	5.63	103.273	5.63	53.314	5.63
0.72226	5.39	0.07109	5.39	0.77495	5.39	2.74695	5.39	0.84271	5.39	103.29	5.39	53.3147	5.39
0.72229	5.72	0.07109	5.72	0.77496	5.72	2.747	5.72	0.84273	5.72	103.291	5.72	53.3157	5.72
0.72232	5.57	0.07112	5.57	0.77496	5.57	2.74715	5.57	0.84273	5.57	103.297	5.57	53.3182	5.57
0.7225	5.83	0.07114	5.83	0.77505	5.83	2.74728	5.83	0.84275	5.83	103.302	5.83	53.3184	5.83
0.72256	5.7	0.07115	5.7	0.77506	5.7	2.74743	5.7	0.84281	5.7	103.304	5.7	53.3215	5.7
0.72256	5.45	0.07115	5.45	0.77507	5.45	2.74761	5.45	0.84283	5.45	103.309	5.45	53.3281	5.45
0.72279	5.27	0.07115	5.27	0.77511	5.27	2.74788	5.27	0.84295	5.27	103.322	5.27	53.3398	5.27
0.72282	5.51	0.07115	5.51	0.77515	5.51	2.74807	5.51	0.84295	5.51	103.328	5.51	53.3434	5.51
0.72298	5.52	0.07115	5.52	0.77517	5.52	2.74811	5.52	0.84296	5.52	103.332	5.52	53.3487	5.52
0.72303	5.26	0.07116	5.26	0.77518	5.26	2.74819	5.26	0.84306	5.26	103.345	5.26	53.3521	5.26
0.72314	5.76	0.07117	5.76	0.77518	5.76	2.74824	5.76	0.8431	5.76	103.346	5.76	53.3531	5.76
0.72321	5.16	0.07119	5.16	0.7752	5.16	2.74827	5.16	0.84311	5.16	103.359	5.16	53.3533	5.16
0.72346	5.72	0.07119	5.72	0.77523	5.72	2.74885	5.72	0.84313	5.72	103.384	5.72	53.3556	5.72
0.72361	5.38	0.07119	5.38	0.77524	5.38	2.74893	5.38	0.84321	5.38	103.402	5.38	53.3634	5.38
0.72367	5.67	0.0712	5.67	0.77526	5.67	2.74915	5.67	0.84327	5.67	103.404	5.67	53.3745	5.67
0.72371	5.28	0.07121	5.28	0.77528	5.28	2.74921	5.28	0.84341	5.28	103.404	5.28	53.3764	5.28
0.72377	5.48	0.07121	5.48	0.77531	5.48	2.74921	5.48	0.84344	5.48	103.415	5.48	53.3765	5.48
0.72382	5.28	0.07121	5.28	0.77537	5.28	2.74926	5.28	0.84353	5.28	103.423	5.28	53.3789	5.28
0.7239	5.59	0.07122	5.59	0.77538	5.59	2.74964	5.59	0.84354	5.59	103.428	5.59	53.3837	5.59
0.72394	5.57	0.07122	5.57	0.77539	5.57	2.74968	5.57	0.84354	5.57	103.43	5.57	53.3844	5.57
0.72409	5.8	0.07123	5.8	0.77545	5.8	2.75009	5.8	0.84363	5.8	103.436	5.8	53.3939	5.8
0.72424	5.47	0.07123	5.47	0.77545	5.47	2.75013	5.47	0.84363	5.47	103.437	5.47	53.398	5.47
0.72447	5.41	0.07123	5.41	0.77549	5.41	2.7503	5.41	0.84364	5.41	103.44	5.41	53.3984	5.41
0.72504	5.44	0.07124	5.44	0.7755	5.44	2.75031	5.44	0.84369	5.44	103.448	5.44	53.4046	5.44
0.72513	5.8	0.07125	5.8	0.7755	5.8	2.75037	5.8	0.84369	5.8	103.453	5.8	53.4058	5.8
0.72536	5.42	0.07125	5.42	0.77552	5.42	2.75072	5.42	0.8437	5.42	103.455	5.42	53.4061	5.42
0.72537	5.92	0.07127	5.92	0.77553	5.92	2.75076	5.92	0.84377	5.92	103.457	5.92	53.4101	5.92
0.72548	5.44	0.07128	5.44	0.77553	5.44	2.75094	5.44	0.84379	5.44	103.462	5.44	53.4121	5.44
0.7257	5.45	0.0713	5.45	0.77553	5.45	2.75097	5.45	0.84383	5.45	103.464	5.45	53.4122	5.45
0.7262	5.75	0.0713	5.75	0.77559	5.75	2.75119	5.75	0.84384	5.75	103.465	5.75	53.4185	5.75
0.72633	5.45	0.0713	5.45	0.77561	5.45	2.75121	5.45	0.84387	5.45	103.472	5.45	53.4192	5.45
0.72641	5.45	0.07131	5.45	0.77561	5.45	2.75129	5.45	0.84388	5.45	103.478	5.45	53.4202	5.45
0.72649	5.33	0.07131	5.33	0.77568	5.33	2.7513	5.33	0.84389	5.33	103.484	5.33	53.4207	5.33
0.72666	5.23	0.07132	5.23	0.77569	5.23	2.7515	5.23	0.8439	5.23	103.484	5.23	53.4246	5.23
0.72671	5.25	0.07132	5.25	0.7757	5.25	2.75151	5.25	0.8439	5.25	103.488	5.25	53.429	5.25
0.72686	5.55	0.07134	5.55	0.77577	5.55	2.75159	5.55	0.84399	5.55	103.496	5.55	53.4292	5.55
0.72686	5.25	0.07134	5.25	0.77581	5.25	2.75167	5.25	0.844	5.25	103.498	5.25	53.4313	5.25
0.72726	5.46	0.07136	5.46	0.77585	5.46	2.75191	5.46	0.844	5.46	103.503	5.46	53.4333	5.46
0.7274	5.83	0.07138	5.83	0.77587	5.83	2.75231	5.83	0.84411	5.83	103.506	5.83	53.4354	5.83
0.72741	5.45	0.07138	5.45	0.77588	5.45	2.75238	5.45	0.84431	5.45	103.523	5.45	53.4357	5.45
0.72762	5.51	0.07138	5.51	0.77591	5.51	2.75239	5.51	0.84433	5.51	103.529	5.51	53.437	5.51
0.72767	5.32	0.0714	5.32	0.77592	5.32	2.75241	5.32	0.84439	5.32	103.553	5.32	53.4376	5.32
0.72784	5.33	0.07141	5.33	0.77597	5.33	2.75258	5.33	0.84441	5.33	103.554	5.33	53.4404	5.33
0.72805	5.88	0.07141	5.88	0.77601	5.88	2.75259	5.88	0.84452	5.88	103.554	5.88	53.4493	5.88
0.72855	5.93	0.07144	5.93	0.77603	5.93	2.75266	5.93	0.84455	5.93	103.56	5.93	53.4497	5.93
0.72857	5.24	0.07144	5.24	0.77605	5.24	2.75271	5.24	0.84455	5.24	103.575	5.24	53.4508	5.24
0.72878	5.47	0.07145	5.47	0.77606	5.47	2.75275	5.47	0.84459	5.47	103.607	5.47	53.451	5.47
0.7289	5.47	0.07146	5.47	0.77607	5.47	2.75288	5.47	0.84465	5.47	103.614	5.47	53.4526	5.47
0.72918	5.65	0.07146	5.65	0.77607	5.65	2.75298	5.65	0.84465	5.65	103.621	5.65	53.4565	5.65
0.72934	5.52	0.07146	5.52	0.77608	5.52	2.75308	5.52	0.84467	5.52	103.642	5.52	53.4667	5.52
0.72939	5.24	0.07151	5.24	0.77608	5.24	2.7531	5.24	0.84471	5.24	103.644	5.24	53.4723	5.24
0.72957	5.56	0.07151	5.56	0.77611	5.56	2.75325	5.56	0.84484	5.56	103.648	5.56	53.4725	5.56
0.72958	5.74	0.07152	5.74	0.77615	5.74	2.75331	5.74	0.84491	5.74	103.65	5.74	53.4741	5.74
0.72959	5.54	0.07154	5.54	0.77616	5.54	2.75335	5.54	0.845	5.54	103.651	5.54	53.4748	5.54
0.72959	5.72	0.07154	5.72	0.77616	5.72	2.75372	5.72	0.84511	5.72	103.67	5.72	53.476	5.72
0.72976	5.57	0.07156	5.57	0.77628	5.57	2.75378	5.57	0.84515	5.57	103.679	5.57	53.4851	5.57
0.73011	5.72	0.07156	5.72	0.77632	5.72	2.75389	5.72	0.8452	5.72	103.682	5.72	53.4935	5.72
0.73014	5.86	0.07156	5.86	0.77633	5.86	2.7539	5.86	0.84524	5.86	103.702	5.86	53.4951	5.86
0.73016	5.73	0.07159	5.73	0.77634	5.73	2.75395	5.73	0.84525	5.73	103.712	5.73	53.4984	5.73
0.73021	5.47	0.0716	5.47	0.77638	5.47	2.75396	5.47	0.8453	5.47	103.716	5.47	53.4985	5.47
0.73026	5.46	0.07161	5.46	0.7764	5.46	2.75412	5.46	0.8453	5.46	103.73	5.46	53.4989	5.46
0.73042	5.28	0.07161	5.28	0.77642	5.28	2.7542	5.28	0.84535	5.28	103.737	5.28	53.507	5.28
0.73045	5.61	0.07163	5.61	0.77642	5.61	2.75432	5.61	0.8454	5.61	103.737	5.61	53.5084	5.61
0.73049	5.41	0.07163	5.41	0.77642	5.41	2.75434	5.41	0.84542	5.41	103.741	5.41	53.5108	5.41
0.7305	5.36	0.07164	5.36	0.77644	5.36	2.75484	5.36	0.84547	5.36	103.745	5.36	53.5108	5.36
0.73069	6.01	0.07165	6.01	0.77649	6.01	2.75505	6.01	0.84547	6.01	103.749	6.01	53.5122	6.01
0.73079	5.43	0.07165	5.43	0.7765	5.43	2.75512	5.43	0.84549	5.43	103.753	5.43	53.5136	5.43
0.73083	5.62	0.07166	5.62	0.77651	5.62	2.75514	5.62	0.84553	5.62	103.766	5.62	53.5201	5.62
0.73087	5.53	0.07166	5.53	0.77653	5.53	2.75518	5.53	0.84556	5.53	103.772	5.53	53.5232	5.53
0.73089	5.73	0.07167	5.73	0.77655	5.73	2.75525	5.73	0.84563	5.73	103.774	5.73	53.5256	5.73
0.73101	5.63	0.07167	5.63	0.77659	5.63	2.75541	5.63	0.84569	5.63	103.785	5.63	53.5281	5.63
0.73105	5.84	0.07167	5.84	0.77661	5.84	2.75541	5.84	0.8459	5.84	103.792	5.84	53.5323	5.84
0.73116	5.42	0.07168	5.42	0.77665	5.42	2.75584	5.42	0.84592	5.42	103.794	5.42	53.5349	5.42
0.7315	5.56	0.07168	5.56	0.77666	5.56	2.75593	5.56	0.84594	5.56	103.8	5.56	53.5351	5.56
0.73154	5.37	0.07169	5.37	0.77671	5.37	2.75621	5.37	0.84594	5.37	103.802	5.37	53.5412	5.37
0.73155	5.51	0.07169	5.51	0.77675	5.51	2.7563	5.51	0.84595	5.51	103.809	5.51	53.5425	5.51
0.73167	5.74	0.07171	5.74	0.77676	5.74	2.75639	5.74	0.84611	5.74	103.809	5.74	53.5444	5.74
0.73181	5.38	0.07171	5.38	0.77677	5.38	2.75639	5.38	0.84617	5.38	103.824	5.38	53.5457	5.38
0.7319	5.82	0.07171	5.82	0.77679	5.82	2.75646	5.82	0.84618	5.82	103.84	5.82	53.5463	5.82
0.73193	5.73	0.07172	5.73	0.77679	5.73	2.75651	5.73	0.84621	5.73	103.841	5.73	53.547	5.73
0.73201	5.51	0.07174	5.51	0.7768	5.51	2.75664	5.51	0.84623	5.51	103.846	5.51	53.5479	5.51
0.73209	5.57	0.07175	5.57	0.7768	5.57	2.75664	5.57	0.84624	5.57	103.859	5.57	53.5517	5.57
0.73212	5.74	0.07176	5.74	0.77683	5.74	2.75684	5.74	0.84626	5.74	103.871	5.74	53.5558	5.74
0.73236	5.75	0.07177	5.75	0.77684	5.75	2.75711	5.75	0.84626	5.75	103.879	5.75	53.5565	5.75
0.73249	5.68	0.07177	5.68	0.77686	5.68	2.75724	5.68	0.84647	5.68	103.89	5.68	53.5612	5.68
0.73251	5.52	0.07178	5.52	0.77686	5.52	2.75766	5.52	0.84648	5.52	103.894	5.52	53.5635	5.52
0.73259	5.44	0.07182	5.44	0.77686	5.44	2.75779	5.44	0.84651	5.44	103.899	5.44	53.5645	5.44
0.73265	5.45	0.07183	5.45	0.77689	5.45	2.75779	5.45	0.84653	5.45	103.908	5.45	53.5686	5.45
0.73281	5.41	0.07183	5.41	0.77691	5.41	2.7578	5.41	0.84654	5.41	103.913	5.41	53.5691	5.41
0.73281	5.67	0.07184	5.67	0.77697	5.67	2.75808	5.67	0.84654	5.67	103.919	5.67	53.5708	5.67
0.73297	5.33	0.07184	5.33	0.77701	5.33	2.7582	5.33	0.84654	5.33	103.92	5.33	53.572	5.33
0.73302	5.5	0.07184	5.5	0.77702	5.5	2.75832	5.5	0.84657	5.5	103.926	5.5	53.5769	5.5
0.7332	5.49	0.07185	5.49	0.77702	5.49	2.75833	5.49	0.84664	5.49	103.937	5.49	53.581	5.49
0.73334	5.47	0.07186	5.47	0.77707	5.47	2.75849	5.47	0.84677	5.47	103.959	5.47	53.5818	5.47
0.73334	5.28	0.07187	5.28	0.77708	5.28	2.7585	5.28	0.84678	5.28	103.965	5.28	53.5836	5.28
0.73415	5.38	0.07187	5.38	0.77708	5.38	2.75857	5.38	0.8468	5.38	103.975	5.38	53.5881	5.38
0.73416	5.72	0.07187	5.72	0.77711	5.72	2.7586	5.72	0.8469	5.72	103.976	5.72	53.5904	5.72
0.7344	5.86	0.07188	5.86	0.77713	5.86	2.75862	5.86	0.8469	5.86	103.991	5.86	53.5907	5.86
0.73442	5.9	0.07189	5.9	0.77716	5.9	2.75876	5.9	0.84693	5.9	103.993	5.9	53.5908	5.9
0.73457	5.9	0.07189	5.9	0.77717	5.9	2.75891	5.9	0.84699	5.9	103.995	5.9	53.5911	5.9
0.73457	5.74	0.07189	5.74	0.77719	5.74	2.75899	5.74	0.847	5.74	103.997	5.74	53.5918	5.74
0.73479	5.61	0.0719	5.61	0.7772	5.61	2.75904	5.61	0.84701	5.61	104.021	5.61	53.5924	5.61
0.73484	5.54	0.0719	5.54	0.77729	5.54	2.75929	5.54	0.84706	5.54	104.042	5.54	53.5933	5.54
0.73486	5.58	0.07191	5.58	0.7773	5.58	2.75933	5.58	0.84708	5.58	104.048	5.58	53.6048	5.58
0.73491	5.69	0.07191	5.69	0.77733	5.69	2.75936	5.69	0.84708	5.69	104.072	5.69	53.6075	5.69
0.73517	5.42	0.07191	5.42	0.77733	5.42	2.75981	5.42	0.84709	5.42	104.076	5.42	53.6133	5.42
0.73519	5.32	0.07191	5.32	0.77734	5.32	2.75984	5.32	0.8471	5.32	104.091	5.32	53.6148	5.32
0.73532	5.58	0.07193	5.58	0.77735	5.58	2.75986	5.58	0.84716	5.58	104.101	5.58	53.6172	5.58
0.73551	5.21	0.07194	5.21	0.77736	5.21	2.76017	5.21	0.84718	5.21	104.105	5.21	53.6255	5.21
0.73557	5.91	0.07194	5.91	0.7774	5.91	2.7602	5.91	0.84722	5.91	104.111	5.91	53.6255	5.91
0.73558	5.57	0.07195	5.57	0.7774	5.57	2.76053	5.57	0.8473	5.57	104.114	5.57	53.6281	5.57
0.73563	5.45	0.07197	5.45	0.77746	5.45	2.76085	5.45	0.8473	5.45	104.123	5.45	53.6296	5.45
0.73566	5.39	0.07198	5.39	0.7775	5.39	2.761	5.39	0.8473	5.39	104.127	5.39	53.6305	5.39
0.73586	5.71	0.07199	5.71	0.77751	5.71	2.76115	5.71	0.8474	5.71	104.149	5.71	53.634	5.71
0.73626	5.74	0.07199	5.74	0.77751	5.74	2.76117	5.74	0.84743	5.74	104.156	5.74	53.6351	5.74
0.73627	5.63	0.07199	5.63	0.77753	5.63	2.76127	5.63	0.84745	5.63	104.162	5.63	53.6415	5.63
0.73651	5.85	0.07199	5.85	0.77754	5.85	2.76135	5.85	0.84748	5.85	104.168	5.85	53.6421	5.85
0.73668	5.75	0.072	5.75	0.77755	5.75	2.76137	5.75	0.84751	5.75	104.174	5.75	53.6427	5.75
0.73672	5.58	0.07201	5.58	0.77762	5.58	2.76156	5.58	0.84763	5.58	104.182	5.58	53.6431	5.58
0.7368	5.23	0.07204	5.23	0.77768	5.23	2.76166	5.23	0.84764	5.23	104.183	5.23	53.6433	5.23
0.73703	5.79	0.07205	5.79	0.7777	5.79	2.76183	5.79	0.84776	5.79	104.184	5.79	53.6459	5.79
0.73709	5.74	0.07205	5.74	0.77773	5.74	2.76191	5.74	0.84781	5.74	104.193	5.74	53.6522	5.74
0.73714	5.54	0.07205	5.54	0.77774	5.54	2.76197	5.54	0.84785	5.54	104.203	5.54	53.6565	5.54
0.73714	5.77	0.07206	5.77	0.77774	5.77	2.762	5.77	0.84785	5.77	104.207	5.77	53.6662	5.77
0.73722	5.5	0.07207	5.5	0.77781	5.5	2.76203	5.5	0.84791	5.5	104.216	5.5	53.6685	5.5
0.73727	5.83	0.07208	5.83	0.77784	5.83	2.76236	5.83	0.84792	5.83	104.229	5.83	53.67	5.83
0.73729	5.41	0.07209	5.41	0.77789	5.41	2.76246	5.41	0.84797	5.41	104.229	5.41	53.6709	5.41
0.73757	5.83	0.07209	5.83	0.77794	5.83	2.76246	5.83	0.848	5.83	104.23	5.83	53.6761	5.83
0.73764	5.67	0.0721	5.67	0.77795	5.67	2.76256	5.67	0.84801	5.67	104.232	5.67	53.6762	5.67
0.73792	5.71	0.07211	5.71	0.77807	5.71	2.76261	5.71	0.84807	5.71	104.234	5.71	53.6763	5.71
0.738	5.53	0.07211	5.53	0.77808	5.53	2.76266	5.53	0.84808	5.53	104.24	5.53	53.6851	5.53
0.73805	5.68	0.07213	5.68	0.77808	5.68	2.76292	5.68	0.84808	5.68	104.24	5.68	53.6863	5.68
0.73823	5.24	0.07213	5.24	0.77811	5.24	2.76304	5.24	0.8481	5.24	104.253	5.24	53.6923	5.24
0.7383	5.51	0.07214	5.51	0.77812	5.51	2.76308	5.51	0.8481	5.51	104.254	5.51	53.6932	5.51
0.73878	5.5	0.07215	5.5	0.77814	5.5	2.76311	5.5	0.84811	5.5	104.254	5.5	53.6949	5.5
0.73895	5.69	0.07215	5.69	0.77816	5.69	2.76344	5.69	0.84813	5.69	104.257	5.69	53.6955	5.69
0.73897	5.81	0.07215	5.81	0.77817	5.81	2.76348	5.81	0.84814	5.81	104.275	5.81	53.6992	5.81
0.73936	5.44	0.07221	5.44	0.77818	5.44	2.76349	5.44	0.84815	5.44	104.278	5.44	53.7005	5.44
0.73938	5.71	0.07221	5.71	0.77818	5.71	2.76369	5.71	0.84816	5.71	104.28	5.71	53.7123	5.71
0.7404	5.46	0.07221	5.46	0.77819	5.46	2.76384	5.46	0.84819	5.46	104.31	5.46	53.7166	5.46
0.74054	5.76	0.07221	5.76	0.7782	5.76	2.76397	5.76	0.84819	5.76	104.315	5.76	53.7216	5.76
0.74082	5.58	0.07222	5.58	0.77821	5.58	2.76431	5.58	0.84819	5.58	104.318	5.58	53.7228	5.58
0.74088	5.9	0.07222	5.9	0.77824	5.9	2.76433	5.9	0.84825	5.9	104.32	5.9	53.7234	5.9
0.74094	5.45	0.07222	5.45	0.77826	5.45	2.76443	5.45	0.8484	5.45	104.332	5.45	53.725	5.45
0.74095	5.8	0.07223	5.8	0.77826	5.8	2.76446	5.8	0.84844	5.8	104.341	5.8	53.7254	5.8
0.74099	5.1	0.07223	5.1	0.77828	5.1	2.76458	5.1	0.84847	5.1	104.343	5.1	53.7344	5.1
0.74117	5.36	0.07227	5.36	0.7783	5.36	2.76471	5.36	0.84847	5.36	104.361	5.36	53.7362	5.36
0.74128	5.71	0.07228	5.71	0.7783	5.71	2.76475	5.71	0.84848	5.71	104.367	5.71	53.7376	5.71
0.74151	5.4	0.07232	5.4	0.77831	5.4	2.7648	5.4	0.8485	5.4	104.385	5.4	53.7377	5.4
0.74162	5.54	0.07232	5.54	0.77832	5.54	2.76486	5.54	0.84859	5.54	104.389	5.54	53.7436	5.54
0.74163	5.65	0.07232	5.65	0.77833	5.65	2.76494	5.65	0.84863	5.65	104.407	5.65	53.7516	5.65
0.74177	5.48	0.07233	5.48	0.77836	5.48	2.76497	5.48	0.84883	5.48	104.414	5.48	53.755	5.48
0.74179	5.49	0.07233	5.49	0.77838	5.49	2.76519	5.49	0.84884	5.49	104.418	5.49	53.7601	5.49
0.74195	5.56	0.07233	5.56	0.77841	5.56	2.76531	5.56	0.84888	5.56	104.418	5.56	53.7627	5.56
0.74227	5.55	0.07233	5.55	0.77842	5.55	2.76556	5.55	0.84893	5.55	104.428	5.55	53.7634	5.55
0.74229	5.74	0.07234	5.74	0.77842	5.74	2.76566	5.74	0.84894	5.74	104.442	5.74	53.7781	5.74
0.74239	5.41	0.07235	5.41	0.77844	5.41	2.76594	5.41	0.84902	5.41	104.446	5.41	53.7787	5.41
0.74245	5.69	0.07235	5.69	0.77844	5.69	2.76599	5.69	0.84903	5.69	104.458	5.69	53.78	5.69
0.74254	5.75	0.07235	5.75	0.77848	5.75	2.76604	5.75	0.84904	5.75	104.461	5.75	53.7894	5.75
0.74263	5.53	0.07236	5.53	0.77849	5.53	2.76604	5.53	0.84905	5.53	104.466	5.53	53.7955	5.53
0.7427	5.66	0.07239	5.66	0.77854	5.66	2.76606	5.66	0.8491	5.66	104.476	5.66	53.7968	5.66
0.74276	5.48	0.07239	5.48	0.77855	5.48	2.76613	5.48	0.84929	5.48	104.479	5.48	53.804	5.48
0.74301	5.37	0.07241	5.37	0.77857	5.37	2.76637	5.37	0.84935	5.37	104.481	5.37	53.8075	5.37
0.74302	5.57	0.07241	5.57	0.77858	5.57	2.76692	5.57	0.84942	5.57	104.482	5.57	53.8082	5.57
0.74305	5.79	0.07244	5.79	0.7786	5.79	2.76699	5.79	0.84948	5.79	104.498	5.79	53.8085	5.79
0.74349	5.29	0.07244	5.29	0.77862	5.29	2.7671	5.29	0.84948	5.29	104.505	5.29	53.8201	5.29
0.74364	5.69	0.07244	5.69	0.77866	5.69	2.76753	5.69	0.84949	5.69	104.508	5.69	53.8235	5.69
0.74372	5.59	0.07245	5.59	0.77866	5.59	2.76762	5.59	0.84952	5.59	104.532	5.59	53.8237	5.59
0.74407	5.71	0.07247	5.71	0.77867	5.71	2.76787	5.71	0.84952	5.71	104.552	5.71	53.8361	5.71
0.74407	5.69	0.07247	5.69	0.77869	5.69	2.76803	5.69	0.8496	5.69	104.572	5.69	53.8394	5.69
0.74422	5.56	0.07248	5.56	0.77875	5.56	2.76819	5.56	0.84963	5.56	104.576	5.56	53.8429	5.56
0.74422	5.42	0.07248	5.42	0.77878	5.42	2.76824	5.42	0.84965	5.42	104.578	5.42	53.8454	5.42
0.74451	5.54	0.07249	5.54	0.77878	5.54	2.7683	5.54	0.84967	5.54	104.608	5.54	53.8478	5.54
0.74457	5.77	0.07249	5.77	0.77879	5.77	2.76861	5.77	0.84979	5.77	104.616	5.77	53.8506	5.77
0.74472	5.58	0.0725	5.58	0.7788	5.58	2.76864	5.58	0.8498	5.58	104.621	5.58	53.8507	5.58
0.74481	5.46	0.0725	5.46	0.77885	5.46	2.7687	5.46	0.8498	5.46	104.631	5.46	53.8509	5.46
0.74491	5.52	0.07251	5.52	0.77885	5.52	2.76882	5.52	0.8498	5.52	104.634	5.52	53.852	5.52
0.74501	5.28	0.07252	5.28	0.77888	5.28	2.76885	5.28	0.84983	5.28	104.647	5.28	53.8521	5.28
0.74502	5.64	0.07252	5.64	0.77889	5.64	2.76908	5.64	0.84983	5.64	104.649	5.64	53.8525	5.64
0.74505	5.73	0.07252	5.73	0.77891	5.73	2.7692	5.73	0.84984	5.73	104.662	5.73	53.8558	5.73
0.74511	5.3	0.07254	5.3	0.77892	5.3	2.76923	5.3	0.84991	5.3	104.662	5.3	53.8582	5.3
0.74522	5.51	0.07255	5.51	0.77892	5.51	2.76939	5.51	0.84992	5.51	104.674	5.51	53.8651	5.51
0.74531	5.85	0.07257	5.85	0.77892	5.85	2.76948	5.85	0.84993	5.85	104.675	5.85	53.8655	5.85
0.7456	5.14	0.07259	5.14	0.77897	5.14	2.76959	5.14	0.84997	5.14	104.695	5.14	53.8682	5.14
0.74566	5.43	0.07259	5.43	0.779	5.43	2.76959	5.43	0.84997	5.43	104.702	5.43	53.8748	5.43
0.74571	6.06	0.0726	6.06	0.77904	6.06	2.76975	6.06	0.85001	6.06	104.708	6.06	53.8774	6.06
0.746	5.34	0.07263	5.34	0.77906	5.34	2.76991	5.34	0.85014	5.34	104.714	5.34	53.8782	5.34
0.74602	5.64	0.07263	5.64	0.77911	5.64	2.77016	5.64	0.85016	5.64	104.715	5.64	53.8828	5.64
0.74615	5.63	0.07265	5.63	0.77913	5.63	2.77036	5.63	0.85018	5.63	104.723	5.63	53.8891	5.63
0.74628	5.35	0.07265	5.35	0.77914	5.35	2.77046	5.35	0.8502	5.35	104.729	5.35	53.8926	5.35
0.74629	5.73	0.07265	5.73	0.77924	5.73	2.77066	5.73	0.85021	5.73	104.731	5.73	53.8927	5.73
0.74634	5.49	0.07267	5.49	0.77925	5.49	2.77076	5.49	0.85024	5.49	104.74	5.49	53.8938	5.49
0.74644	5.52	0.07267	5.52	0.77928	5.52	2.77084	5.52	0.85026	5.52	104.745	5.52	53.8985	5.52
0.74662	5.6	0.07268	5.6	0.77931	5.6	2.77084	5.6	0.85034	5.6	104.751	5.6	53.9057	5.6
0.74665	5.62	0.07269	5.62	0.77932	5.62	2.77086	5.62	0.85035	5.62	104.752	5.62	53.9074	5.62
0.74673	5.53	0.0727	5.53	0.77934	5.53	2.77094	5.53	0.85041	5.53	104.752	5.53	53.9094	5.53
0.74677	5.31	0.07271	5.31	0.77938	5.31	2.77109	5.31	0.85042	5.31	104.757	5.31	53.9107	5.31
0.74677	5.29	0.07271	5.29	0.77939	5.29	2.77116	5.29	0.85044	5.29	104.776	5.29	53.9136	5.29
0.74687	5.77	0.07271	5.77	0.77942	5.77	2.77129	5.77	0.85046	5.77	104.798	5.77	53.9156	5.77
0.74692	5.32	0.07271	5.32	0.77943	5.32	2.77141	5.32	0.85047	5.32	104.805	5.32	53.9164	5.32
0.74694	5.5	0.07273	5.5	0.77948	5.5	2.77144	5.5	0.85048	5.5	104.829	5.5	53.923	5.5
0.74697	5.55	0.07273	5.55	0.77952	5.55	2.77148	5.55	0.85048	5.55	104.835	5.55	53.9257	5.55
0.74702	5.61	0.07273	5.61	0.77956	5.61	2.77169	5.61	0.8506	5.61	104.86	5.61	53.9267	5.61
0.74726	5.66	0.07274	5.66	0.77956	5.66	2.77206	5.66	0.85062	5.66	104.86	5.66	53.93	5.66
0.74754	5.6	0.07274	5.6	0.77961	5.6	2.7721	5.6	0.85071	5.6	104.884	5.6	53.9308	5.6
0.74761	5.27	0.07275	5.27	0.77968	5.27	2.77211	5.27	0.85079	5.27	104.902	5.27	53.9321	5.27
0.74763	5.62	0.07276	5.62	0.77972	5.62	2.77227	5.62	0.8508	5.62	104.914	5.62	53.9339	5.62
0.74765	5.55	0.07279	5.55	0.77973	5.55	2.77241	5.55	0.8508	5.55	104.914	5.55	53.935	5.55
0.74808	5.65	0.07279	5.65	0.77977	5.65	2.77251	5.65	0.85082	5.65	104.914	5.65	53.9442	5.65
0.74808	5.56	0.07279	5.56	0.77977	5.56	2.77253	5.56	0.85088	5.56	104.924	5.56	53.9541	5.56
0.74818	5.77	0.0728	5.77	0.77977	5.77	2.77264	5.77	0.85092	5.77	104.925	5.77	53.9577	5.77
0.74818	5.81	0.07281	5.81	0.77979	5.81	2.77286	5.81	0.85092	5.81	104.927	5.81	53.9598	5.81
0.74821	5.69	0.07282	5.69	0.7798	5.69	2.77302	5.69	0.85098	5.69	104.931	5.69	53.9619	5.69
0.74826	5.69	0.07283	5.69	0.7798	5.69	2.77318	5.69	0.85104	5.69	104.94	5.69	53.9621	5.69
0.74834	5.31	0.07284	5.31	0.77981	5.31	2.77319	5.31	0.85105	5.31	104.95	5.31	53.9678	5.31
0.74836	5.66	0.07285	5.66	0.77982	5.66	2.77335	5.66	0.85113	5.66	104.951	5.66	53.9694	5.66
0.74838	5.49	0.07285	5.49	0.77983	5.49	2.77345	5.49	0.85117	5.49	104.963	5.49	53.9695	5.49
0.74855	5.91	0.07285	5.91	0.77983	5.91	2.77354	5.91	0.85122	5.91	104.992	5.91	53.9708	5.91
0.74876	5.66	0.07286	5.66	0.77984	5.66	2.77367	5.66	0.85128	5.66	104.992	5.66	53.972	5.66
0.74899	5.45	0.07288	5.45	0.77988	5.45	2.77379	5.45	0.85129	5.45	105.006	5.45	53.9818	5.45
0.749	5.67	0.07288	5.67	0.77988	5.67	2.77384	5.67	0.8513	5.67	105.036	5.67	53.9839	5.67
0.74905	5.49	0.07289	5.49	0.7799	5.49	2.77415	5.49	0.85133	5.49	105.04	5.49	53.9936	5.49
0.74909	5.65	0.07289	5.65	0.77993	5.65	2.77432	5.65	0.85134	5.65	105.042	5.65	53.9999	5.65
0.7491	5.47	0.07289	5.47	0.77995	5.47	2.77454	5.47	0.85135	5.47	105.056	5.47	54.0026	5.47
0.74913	5.83	0.07289	5.83	0.77997	5.83	2.77463	5.83	0.85136	5.83	105.06	5.83	54.0045	5.83
0.74931	5.46	0.07291	5.46	0.77997	5.46	2.77476	5.46	0.85139	5.46	105.1	5.46	54.0103	5.46
0.74939	5.59	0.07292	5.59	0.78	5.59	2.77487	5.59	0.85141	5.59	105.102	5.59	54.012	5.59
0.74941	5.67	0.07293	5.67	0.78	5.67	2.77491	5.67	0.8516	5.67	105.116	5.67	54.0135	5.67
0.74945	5.93	0.07294	5.93	0.78002	5.93	2.77495	5.93	0.85167	5.93	105.142	5.93	54.018	5.93
0.74953	5.53	0.07295	5.53	0.78008	5.53	2.77516	5.53	0.85174	5.53	105.15	5.53	54.0224	5.53
0.7496	5.93	0.07297	5.93	0.78008	5.93	2.77525	5.93	0.85174	5.93	105.166	5.93	54.0296	5.93
0.74961	5.82	0.073	5.82	0.78012	5.82	2.77542	5.82	0.85176	5.82	105.177	5.82	54.0318	5.82
0.74962	5.62	0.07301	5.62	0.7802	5.62	2.77567	5.62	0.8518	5.62	105.185	5.62	54.0325	5.62
0.74968	5.57	0.07302	5.57	0.78028	5.57	2.77567	5.57	0.85181	5.57	105.201	5.57	54.0374	5.57
0.74969	5.97	0.07302	5.97	0.78033	5.97	2.7757	5.97	0.85188	5.97	105.213	5.97	54.0379	5.97
0.74972	5.69	0.07304	5.69	0.78035	5.69	2.77584	5.69	0.85189	5.69	105.224	5.69	54.0385	5.69
0.74977	5.72	0.07304	5.72	0.78037	5.72	2.77591	5.72	0.85194	5.72	105.233	5.72	54.0417	5.72
0.74977	5.62	0.07305	5.62	0.78037	5.62	2.77593	5.62	0.85195	5.62	105.235	5.62	54.0451	5.62
0.74985	5.27	0.07306	5.27	0.78039	5.27	2.77596	5.27	0.85196	5.27	105.235	5.27	54.0489	5.27
0.74989	5.79	0.07306	5.79	0.78041	5.79	2.77604	5.79	0.85196	5.79	105.248	5.79	54.0502	5.79
0.74997	5.41	0.07307	5.41	0.78043	5.41	2.77615	5.41	0.85198	5.41	105.25	5.41	54.051	5.41
0.75011	5.63	0.07308	5.63	0.78044	5.63	2.77636	5.63	0.852	5.63	105.253	5.63	54.053	5.63
0.75028	5.36	0.07308	5.36	0.78049	5.36	2.77636	5.36	0.85213	5.36	105.255	5.36	54.0541	5.36
0.75035	4.98	0.0731	4.98	0.78051	4.98	2.77644	4.98	0.85214	4.98	105.259	4.98	54.0565	4.98
0.75045	5.48	0.07312	5.48	0.78052	5.48	2.77652	5.48	0.85218	5.48	105.261	5.48	54.0589	5.48
0.75047	6	0.07312	6	0.78053	6	2.77698	6	0.85219	6	105.264	6	54.0639	6
0.75118	5.61	0.07312	5.61	0.78056	5.61	2.77705	5.61	0.85221	5.61	105.268	5.61	54.066	5.61
0.75136	5.92	0.07313	5.92	0.78056	5.92	2.77705	5.92	0.85224	5.92	105.269	5.92	54.0673	5.92
0.75152	5.58	0.07313	5.58	0.78059	5.58	2.77708	5.58	0.85225	5.58	105.278	5.58	54.0762	5.58
0.75167	5.75	0.07313	5.75	0.78059	5.75	2.77713	5.75	0.8523	5.75	105.279	5.75	54.0805	5.75
0.75185	5.86	0.07313	5.86	0.7806	5.86	2.77721	5.86	0.85232	5.86	105.28	5.86	54.0806	5.86
0.75218	5.7	0.07314	5.7	0.78062	5.7	2.77739	5.7	0.85247	5.7	105.297	5.7	54.0814	5.7
0.7522	5.69	0.07316	5.69	0.78063	5.69	2.77749	5.69	0.85262	5.69	105.304	5.69	54.0854	5.69
0.75268	5.68	0.07319	5.68	0.78065	5.68	2.7775	5.68	0.85265	5.68	105.31	5.68	54.1024	5.68
0.75327	5.34	0.07319	5.34	0.78075	5.34	2.77767	5.34	0.85265	5.34	105.313	5.34	54.1027	5.34
0.75368	5.39	0.0732	5.39	0.78076	5.39	2.7777	5.39	0.85268	5.39	105.321	5.39	54.111	5.39
0.75381	5.91	0.07321	5.91	0.7808	5.91	2.77828	5.91	0.8527	5.91	105.322	5.91	54.1134	5.91
0.75389	5.41	0.07321	5.41	0.7808	5.41	2.77831	5.41	0.85273	5.41	105.327	5.41	54.1187	5.41
0.75399	4.99	0.07322	4.99	0.78081	4.99	2.77839	4.99	0.85274	4.99	105.329	4.99	54.1187	4.99
0.75419	5.3	0.07322	5.3	0.78085	5.3	2.7784	5.3	0.85275	5.3	105.334	5.3	54.1276	5.3
0.7542	5.66	0.07323	5.66	0.78088	5.66	2.77847	5.66	0.85278	5.66	105.348	5.66	54.1303	5.66
0.75432	5.89	0.07326	5.89	0.78091	5.89	2.77855	5.89	0.85278	5.89	105.404	5.89	54.1313	5.89
0.75434	5.59	0.07326	5.59	0.78096	5.59	2.77866	5.59	0.85279	5.59	105.406	5.59	54.1334	5.59
0.75438	5.49	0.07327	5.49	0.78097	5.49	2.77869	5.49	0.85286	5.49	105.412	5.49	54.1452	5.49
0.75457	5.43	0.07328	5.43	0.78097	5.43	2.77877	5.43	0.85286	5.43	105.422	5.43	54.1484	5.43
0.75461	5.44	0.07329	5.44	0.78099	5.44	2.77881	5.44	0.85288	5.44	105.426	5.44	54.1488	5.44
0.75464	5.73	0.07332	5.73	0.78101	5.73	2.77907	5.73	0.85295	5.73	105.433	5.73	54.1494	5.73
0.75468	6.02	0.07333	6.02	0.78103	6.02	2.77956	6.02	0.85306	6.02	105.438	6.02	54.1503	6.02
0.75472	5.41	0.07335	5.41	0.78104	5.41	2.7796	5.41	0.8531	5.41	105.438	5.41	54.1512	5.41
0.75484	5.53	0.07336	5.53	0.78106	5.53	2.7797	5.53	0.85315	5.53	105.469	5.53	54.1519	5.53
0.7551	5.6	0.07337	5.6	0.78107	5.6	2.77978	5.6	0.85316	5.6	105.475	5.6	54.159	5.6
0.75524	5.41	0.07339	5.41	0.78108	5.41	2.77979	5.41	0.85319	5.41	105.494	5.41	54.1596	5.41
0.75532	5.83	0.07339	5.83	0.7811	5.83	2.77988	5.83	0.85335	5.83	105.507	5.83	54.1656	5.83
0.75564	5.67	0.07339	5.67	0.78118	5.67	2.78005	5.67	0.85338	5.67	105.518	5.67	54.167	5.67
0.75588	5.52	0.07339	5.52	0.78118	5.52	2.78006	5.52	0.85339	5.52	105.518	5.52	54.1688	5.52
0.75589	5.49	0.07339	5.49	0.78119	5.49	2.78011	5.49	0.85341	5.49	105.531	5.49	54.1688	5.49
0.75593	5.53	0.0734	5.53	0.7812	5.53	2.78029	5.53	0.85346	5.53	105.531	5.53	54.171	5.53
0.75598	5.75	0.0734	5.75	0.78127	5.75	2.7803	5.75	0.85346	5.75	105.534	5.75	54.1728	5.75
0.75621	5.56	0.07342	5.56	0.78132	5.56	2.78032	5.56	0.85349	5.56	105.55	5.56	54.1741	5.56
0.75623	5.65	0.07342	5.65	0.78133	5.65	2.7807	5.65	0.8535	5.65	105.551	5.65	54.1831	5.65
0.75684	5.61	0.07344	5.61	0.78134	5.61	2.78099	5.61	0.8536	5.61	105.552	5.61	54.1838	5.61
0.75702	5.66	0.07345	5.66	0.78135	5.66	2.78117	5.66	0.85368	5.66	105.563	5.66	54.189	5.66
0.75728	5.82	0.07346	5.82	0.78137	5.82	2.7812	5.82	0.85368	5.82	105.567	5.82	54.1904	5.82
0.7573	5.39	0.07346	5.39	0.7814	5.39	2.78122	5.39	0.85369	5.39	105.58	5.39	54.1996	5.39
0.75736	5.59	0.07348	5.59	0.78142	5.59	2.78134	5.59	0.85373	5.59	105.603	5.59	54.2008	5.59
0.75737	5.68	0.07348	5.68	0.78146	5.68	2.78134	5.68	0.85377	5.68	105.622	5.68	54.2071	5.68
0.75754	5.7	0.07349	5.7	0.78147	5.7	2.78135	5.7	0.85386	5.7	105.629	5.7	54.2072	5.7
0.75788	5.55	0.07354	5.55	0.78149	5.55	2.78153	5.55	0.85387	5.55	105.629	5.55	54.2083	5.55
0.75813	5.05	0.07354	5.05	0.78149	5.05	2.78179	5.05	0.85394	5.05	105.668	5.05	54.2106	5.05
0.75816	6.1	0.07355	6.1	0.78152	6.1	2.78182	6.1	0.85398	6.1	105.685	6.1	54.2107	6.1
0.75828	5.34	0.07357	5.34	0.78153	5.34	2.78195	5.34	0.85402	5.34	105.686	5.34	54.2129	5.34
0.75837	5.86	0.07359	5.86	0.78154	5.86	2.78201	5.86	0.85409	5.86	105.695	5.86	54.2213	5.86
0.75841	5.53	0.07359	5.53	0.78157	5.53	2.78218	5.53	0.85411	5.53	105.724	5.53	54.2253	5.53
0.75843	5.56	0.07362	5.56	0.78157	5.56	2.78219	5.56	0.85411	5.56	105.736	5.56	54.2362	5.56
0.75876	5.43	0.07362	5.43	0.78161	5.43	2.78249	5.43	0.85416	5.43	105.744	5.43	54.237	5.43
0.7588	5.57	0.07363	5.57	0.78163	5.57	2.78278	5.57	0.85419	5.57	105.744	5.57	54.2393	5.57
0.75889	5.84	0.07363	5.84	0.78167	5.84	2.78322	5.84	0.85422	5.84	105.772	5.84	54.2557	5.84
0.75895	5.41	0.07363	5.41	0.78177	5.41	2.78332	5.41	0.85422	5.41	105.777	5.41	54.2565	5.41
0.75896	5.58	0.07363	5.58	0.78177	5.58	2.78358	5.58	0.85426	5.58	105.787	5.58	54.2703	5.58
0.75904	5.43	0.07364	5.43	0.78179	5.43	2.78374	5.43	0.85428	5.43	105.793	5.43	54.271	5.43
0.75924	5.38	0.07364	5.38	0.78184	5.38	2.78376	5.38	0.85429	5.38	105.794	5.38	54.2726	5.38
0.75926	5.3	0.07367	5.3	0.78185	5.3	2.78377	5.3	0.85435	5.3	105.811	5.3	54.2729	5.3
0.75926	5.49	0.07367	5.49	0.78186	5.49	2.78381	5.49	0.85438	5.49	105.813	5.49	54.2737	5.49
0.75929	5.47	0.07368	5.47	0.78186	5.47	2.78387	5.47	0.85438	5.47	105.841	5.47	54.2742	5.47
0.75933	5.14	0.07369	5.14	0.78188	5.14	2.78388	5.14	0.85444	5.14	105.845	5.14	54.2746	5.14
0.75941	5.74	0.07369	5.74	0.78189	5.74	2.78399	5.74	0.85446	5.74	105.854	5.74	54.2751	5.74
0.75943	5.52	0.07371	5.52	0.7819	5.52	2.78402	5.52	0.85446	5.52	105.885	5.52	54.2796	5.52
0.75944	5.72	0.07371	5.72	0.78194	5.72	2.78415	5.72	0.85449	5.72	105.899	5.72	54.2798	5.72
0.75956	5.18	0.07372	5.18	0.78198	5.18	2.7842	5.18	0.85456	5.18	105.902	5.18	54.2805	5.18
0.75957	5.6	0.07372	5.6	0.78198	5.6	2.78422	5.6	0.85457	5.6	105.903	5.6	54.2822	5.6
0.75963	5.51	0.07373	5.51	0.78202	5.51	2.78436	5.51	0.85458	5.51	105.919	5.51	54.2831	5.51
0.75964	5.31	0.07373	5.31	0.78206	5.31	2.78444	5.31	0.85461	5.31	105.922	5.31	54.2845	5.31
0.75969	5.4	0.07373	5.4	0.78208	5.4	2.78465	5.4	0.85462	5.4	105.925	5.4	54.285	5.4
0.75971	5.97	0.07374	5.97	0.78208	5.97	2.78468	5.97	0.85468	5.97	105.952	5.97	54.2864	5.97
0.75987	5.67	0.07374	5.67	0.7821	5.67	2.78477	5.67	0.85471	5.67	105.954	5.67	54.2869	5.67
0.76002	5.45	0.0738	5.45	0.78212	5.45	2.78477	5.45	0.85471	5.45	105.979	5.45	54.2875	5.45
0.76011	5.35	0.07381	5.35	0.78213	5.35	2.78479	5.35	0.85471	5.35	105.986	5.35	54.2887	5.35
0.76016	5.48	0.07381	5.48	0.78215	5.48	2.78499	5.48	0.85474	5.48	105.989	5.48	54.2924	5.48
0.76021	5.4	0.07382	5.4	0.78215	5.4	2.78504	5.4	0.85476	5.4	105.999	5.4	54.2961	5.4
0.76047	5.31	0.07383	5.31	0.78219	5.31	2.7854	5.31	0.85477	5.31	106.001	5.31	54.3027	5.31
0.76059	5.79	0.07384	5.79	0.7822	5.79	2.78553	5.79	0.8548	5.79	106.009	5.79	54.3029	5.79
0.76066	5.24	0.07384	5.24	0.78222	5.24	2.78553	5.24	0.85482	5.24	106.01	5.24	54.3045	5.24
0.76068	5.3	0.07384	5.3	0.78224	5.3	2.78572	5.3	0.85482	5.3	106.029	5.3	54.3049	5.3
0.76081	5.61	0.07385	5.61	0.78226	5.61	2.78593	5.61	0.85488	5.61	106.06	5.61	54.3115	5.61
0.76091	5.82	0.07385	5.82	0.78227	5.82	2.78598	5.82	0.85491	5.82	106.075	5.82	54.3126	5.82
0.76091	5.41	0.07386	5.41	0.78227	5.41	2.78606	5.41	0.85504	5.41	106.077	5.41	54.3169	5.41
0.76099	5.79	0.0739	5.79	0.78229	5.79	2.78621	5.79	0.85509	5.79	106.082	5.79	54.3199	5.79
0.76116	5.37	0.0739	5.37	0.7823	5.37	2.78633	5.37	0.85517	5.37	106.088	5.37	54.3254	5.37
0.76116	5.81	0.0739	5.81	0.78233	5.81	2.7864	5.81	0.85517	5.81	106.123	5.81	54.3279	5.81
0.76124	5.29	0.07391	5.29	0.78233	5.29	2.78649	5.29	0.85518	5.29	106.145	5.29	54.3318	5.29
0.76148	5.6	0.07391	5.6	0.78234	5.6	2.78652	5.6	0.85518	5.6	106.153	5.6	54.3362	5.6
0.76153	5.39	0.07393	5.39	0.78234	5.39	2.78656	5.39	0.85518	5.39	106.171	5.39	54.3399	5.39
0.76159	5.71	0.07393	5.71	0.78238	5.71	2.7867	5.71	0.85519	5.71	106.175	5.71	54.3423	5.71
0.76161	5.63	0.07393	5.63	0.78249	5.63	2.78673	5.63	0.85522	5.63	106.179	5.63	54.3432	5.63
0.76174	5.83	0.07395	5.83	0.78249	5.83	2.78704	5.83	0.85524	5.83	106.188	5.83	54.356	5.83
0.76176	5.66	0.07396	5.66	0.78251	5.66	2.78711	5.66	0.85542	5.66	106.199	5.66	54.3581	5.66
0.76202	5.31	0.07396	5.31	0.78258	5.31	2.78714	5.31	0.85543	5.31	106.207	5.31	54.3642	5.31
0.76205	5.51	0.07399	5.51	0.7826	5.51	2.78723	5.51	0.85546	5.51	106.229	5.51	54.3664	5.51
0.76207	5.45	0.07399	5.45	0.78261	5.45	2.78724	5.45	0.85547	5.45	106.233	5.45	54.3699	5.45
0.76212	5.53	0.07399	5.53	0.78262	5.53	2.78727	5.53	0.85549	5.53	106.234	5.53	54.3731	5.53
0.76217	5.77	0.07404	5.77	0.78263	5.77	2.78741	5.77	0.85554	5.77	106.235	5.77	54.3768	5.77
0.76232	5.78	0.07406	5.78	0.78263	5.78	2.78749	5.78	0.85555	5.78	106.262	5.78	54.3775	5.78
0.76242	5.08	0.07407	5.08	0.78264	5.08	2.7875	5.08	0.85557	5.08	106.262	5.08	54.3779	5.08
0.76248	5.51	0.07409	5.51	0.78267	5.51	2.78758	5.51	0.8556	5.51	106.278	5.51	54.384	5.51
0.76248	5.62	0.07409	5.62	0.78275	5.62	2.78763	5.62	0.85568	5.62	106.331	5.62	54.3846	5.62
0.76289	5.44	0.0741	5.44	0.78282	5.44	2.78816	5.44	0.85572	5.44	106.36	5.44	54.3924	5.44
0.76293	5.56	0.07411	5.56	0.78283	5.56	2.78818	5.56	0.85577	5.56	106.375	5.56	54.3934	5.56
0.76296	5.79	0.07411	5.79	0.78286	5.79	2.78819	5.79	0.8558	5.79	106.383	5.79	54.3937	5.79
0.76298	5.65	0.07414	5.65	0.78287	5.65	2.7882	5.65	0.85591	5.65	106.388	5.65	54.3952	5.65
0.7633	5.58	0.07416	5.58	0.78288	5.58	2.78852	5.58	0.85594	5.58	106.391	5.58	54.4025	5.58
0.76335	5.59	0.07416	5.59	0.78288	5.59	2.78853	5.59	0.85595	5.59	106.401	5.59	54.4037	5.59
0.7634	5.46	0.0742	5.46	0.7829	5.46	2.78854	5.46	0.85597	5.46	106.407	5.46	54.4056	5.46
0.76343	5.73	0.07421	5.73	0.78291	5.73	2.7886	5.73	0.85598	5.73	106.408	5.73	54.4068	5.73
0.76357	5.54	0.07422	5.54	0.78292	5.54	2.78868	5.54	0.85604	5.54	106.419	5.54	54.409	5.54
0.76368	5.43	0.07422	5.43	0.78296	5.43	2.78881	5.43	0.85605	5.43	106.421	5.43	54.4091	5.43
0.76381	5.6	0.07422	5.6	0.783	5.6	2.78891	5.6	0.85605	5.6	106.424	5.6	54.4119	5.6
0.76386	5.35	0.07422	5.35	0.78302	5.35	2.78913	5.35	0.85607	5.35	106.431	5.35	54.4128	5.35
0.76392	5.43	0.07423	5.43	0.78305	5.43	2.78952	5.43	0.85608	5.43	106.434	5.43	54.4198	5.43
0.76395	5.37	0.07424	5.37	0.78306	5.37	2.79	5.37	0.85611	5.37	106.436	5.37	54.4199	5.37
0.76403	5.14	0.07425	5.14	0.78307	5.14	2.79012	5.14	0.85616	5.14	106.463	5.14	54.4211	5.14
0.76436	5.56	0.07426	5.56	0.78307	5.56	2.79021	5.56	0.85618	5.56	106.469	5.56	54.422	5.56
0.76438	5.38	0.07426	5.38	0.78307	5.38	2.79025	5.38	0.85619	5.38	106.471	5.38	54.425	5.38
0.7645	5.81	0.07429	5.81	0.78308	5.81	2.79038	5.81	0.85624	5.81	106.484	5.81	54.4257	5.81
0.76483	5.86	0.07429	5.86	0.78314	5.86	2.79055	5.86	0.85626	5.86	106.486	5.86	54.4263	5.86
0.76486	5.43	0.07432	5.43	0.7832	5.43	2.79061	5.43	0.85628	5.43	106.495	5.43	54.4281	5.43
0.76524	5.16	0.07434	5.16	0.78321	5.16	2.79089	5.16	0.85628	5.16	106.506	5.16	54.4294	5.16
0.76526	5.62	0.07434	5.62	0.78327	5.62	2.79098	5.62	0.85629	5.62	106.515	5.62	54.4349	5.62
0.7655	5.23	0.07434	5.23	0.78328	5.23	2.79123	5.23	0.85632	5.23	106.541	5.23	54.4377	5.23
0.76557	5.54	0.07435	5.54	0.78328	5.54	2.79133	5.54	0.85634	5.54	106.543	5.54	54.4417	5.54
0.76575	5.76	0.07436	5.76	0.7833	5.76	2.79133	5.76	0.85635	5.76	106.546	5.76	54.4418	5.76
0.76606	5.77	0.07437	5.77	0.7833	5.77	2.79154	5.77	0.85636	5.77	106.547	5.77	54.4429	5.77
0.76614	5.61	0.0744	5.61	0.7833	5.61	2.79171	5.61	0.85637	5.61	106.549	5.61	54.447	5.61
0.76622	5.47	0.0744	5.47	0.78331	5.47	2.79172	5.47	0.8564	5.47	106.557	5.47	54.4483	5.47
0.76643	5.48	0.07441	5.48	0.78336	5.48	2.79177	5.48	0.85641	5.48	106.583	5.48	54.45	5.48
0.76676	5.75	0.07441	5.75	0.78336	5.75	2.7919	5.75	0.85643	5.75	106.592	5.75	54.4516	5.75
0.767	5.76	0.07442	5.76	0.78336	5.76	2.792	5.76	0.85648	5.76	106.593	5.76	54.4542	5.76
0.76704	5.61	0.07442	5.61	0.78337	5.61	2.79212	5.61	0.85651	5.61	106.607	5.61	54.4554	5.61
0.76705	5.38	0.07443	5.38	0.78338	5.38	2.79213	5.38	0.85652	5.38	106.632	5.38	54.4565	5.38
0.76712	5.4	0.07444	5.4	0.7834	5.4	2.79213	5.4	0.85653	5.4	106.643	5.4	54.4576	5.4
0.76733	5.82	0.07445	5.82	0.78346	5.82	2.79216	5.82	0.85655	5.82	106.644	5.82	54.4658	5.82
0.768	5.33	0.07446	5.33	0.78356	5.33	2.79247	5.33	0.85655	5.33	106.664	5.33	54.4718	5.33
0.76802	5.44	0.07446	5.44	0.78362	5.44	2.79249	5.44	0.85656	5.44	106.664	5.44	54.4761	5.44
0.76817	5.36	0.07447	5.36	0.78362	5.36	2.79251	5.36	0.85657	5.36	106.686	5.36	54.4786	5.36
0.76855	5.72	0.07447	5.72	0.78366	5.72	2.79251	5.72	0.85659	5.72	106.696	5.72	54.4806	5.72
0.76895	5.58	0.07447	5.58	0.78369	5.58	2.79271	5.58	0.85659	5.58	106.698	5.58	54.4843	5.58
0.76899	5.41	0.07448	5.41	0.7837	5.41	2.79306	5.41	0.8566	5.41	106.706	5.41	54.4857	5.41
0.76903	5.43	0.07451	5.43	0.78376	5.43	2.79307	5.43	0.85665	5.43	106.728	5.43	54.4955	5.43
0.76913	5.42	0.07452	5.42	0.78381	5.42	2.79326	5.42	0.85665	5.42	106.73	5.42	54.5065	5.42
0.7692	5.81	0.07453	5.81	0.78387	5.81	2.79337	5.81	0.85668	5.81	106.734	5.81	54.5126	5.81
0.76931	5.46	0.07453	5.46	0.78387	5.46	2.79377	5.46	0.8567	5.46	106.735	5.46	54.5135	5.46
0.76942	5.75	0.07453	5.75	0.78391	5.75	2.79379	5.75	0.85672	5.75	106.738	5.75	54.5148	5.75
0.76952	5.96	0.07454	5.96	0.78398	5.96	2.7941	5.96	0.85674	5.96	106.75	5.96	54.5201	5.96
0.76964	5.34	0.07456	5.34	0.784	5.34	2.79413	5.34	0.85685	5.34	106.77	5.34	54.5211	5.34
0.76996	5.4	0.07457	5.4	0.78401	5.4	2.7942	5.4	0.85688	5.4	106.779	5.4	54.5286	5.4
0.77017	5.41	0.07458	5.41	0.78404	5.41	2.79421	5.41	0.85691	5.41	106.785	5.41	54.5295	5.41
0.77029	5.29	0.07462	5.29	0.78407	5.29	2.79445	5.29	0.85691	5.29	106.796	5.29	54.5333	5.29
0.77033	5.47	0.07464	5.47	0.78408	5.47	2.7945	5.47	0.85692	5.47	106.797	5.47	54.5374	5.47
0.77039	5.85	0.07464	5.85	0.78408	5.85	2.79462	5.85	0.85693	5.85	106.818	5.85	54.5377	5.85
0.7705	5.85	0.07464	5.85	0.78411	5.85	2.79488	5.85	0.85702	5.85	106.821	5.85	54.5504	5.85
0.77053	5.88	0.07464	5.88	0.78412	5.88	2.79499	5.88	0.85704	5.88	106.845	5.88	54.5543	5.88
0.77053	5.24	0.07466	5.24	0.78414	5.24	2.79507	5.24	0.85705	5.24	106.849	5.24	54.5564	5.24
0.77058	5.56	0.07466	5.56	0.78416	5.56	2.79509	5.56	0.85709	5.56	106.867	5.56	54.5653	5.56
0.77064	5.83	0.07466	5.83	0.78417	5.83	2.79531	5.83	0.8571	5.83	106.871	5.83	54.5674	5.83
0.77081	5.61	0.07467	5.61	0.78421	5.61	2.79531	5.61	0.85712	5.61	106.902	5.61	54.5678	5.61
0.771	5.59	0.07469	5.59	0.78423	5.59	2.79535	5.59	0.85712	5.59	106.968	5.59	54.5684	5.59
0.77106	5.57	0.0747	5.57	0.78427	5.57	2.79539	5.57	0.85714	5.57	106.973	5.57	54.5704	5.57
0.77109	5.89	0.07471	5.89	0.78434	5.89	2.79546	5.89	0.85715	5.89	106.996	5.89	54.5712	5.89
0.77113	5.72	0.07472	5.72	0.78434	5.72	2.79549	5.72	0.85715	5.72	107.021	5.72	54.5773	5.72
0.7712	5.64	0.07472	5.64	0.78435	5.64	2.79568	5.64	0.85716	5.64	107.022	5.64	54.5846	5.64
0.77122	5.32	0.07475	5.32	0.78436	5.32	2.7958	5.32	0.85716	5.32	107.026	5.32	54.5851	5.32
0.77145	5.67	0.07476	5.67	0.78436	5.67	2.796	5.67	0.85717	5.67	107.027	5.67	54.5856	5.67
0.77149	5.31	0.07478	5.31	0.78436	5.31	2.79606	5.31	0.85724	5.31	107.032	5.31	54.592	5.31
0.7716	5.13	0.07478	5.13	0.78439	5.13	2.79619	5.13	0.85725	5.13	107.034	5.13	54.5926	5.13
0.77171	5.5	0.07479	5.5	0.7844	5.5	2.79651	5.5	0.85727	5.5	107.081	5.5	54.593	5.5
0.77172	5.32	0.07479	5.32	0.78443	5.32	2.79651	5.32	0.85729	5.32	107.116	5.32	54.5934	5.32
0.7719	5.73	0.0748	5.73	0.78447	5.73	2.79654	5.73	0.85735	5.73	107.118	5.73	54.5935	5.73
0.77213	5.49	0.07481	5.49	0.78447	5.49	2.79663	5.49	0.85736	5.49	107.12	5.49	54.5977	5.49
0.77221	5.63	0.07482	5.63	0.7845	5.63	2.7968	5.63	0.85742	5.63	107.132	5.63	54.6033	5.63
0.77229	5.64	0.07483	5.64	0.78451	5.64	2.79696	5.64	0.85742	5.64	107.146	5.64	54.6075	5.64
0.7723	5.98	0.07485	5.98	0.78452	5.98	2.797	5.98	0.85745	5.98	107.175	5.98	54.608	5.98
0.77247	5.55	0.07486	5.55	0.78456	5.55	2.79703	5.55	0.85745	5.55	107.182	5.55	54.6196	5.55
0.77256	5.42	0.07487	5.42	0.78457	5.42	2.79714	5.42	0.85746	5.42	107.189	5.42	54.62	5.42
0.7726	5.69	0.07488	5.69	0.78462	5.69	2.79722	5.69	0.85751	5.69	107.19	5.69	54.6229	5.69
0.77282	5.47	0.07489	5.47	0.78463	5.47	2.79724	5.47	0.85751	5.47	107.2	5.47	54.6257	5.47
0.77292	5.85	0.07489	5.85	0.78463	5.85	2.79734	5.85	0.85752	5.85	107.226	5.85	54.6311	5.85
0.77306	5.42	0.07489	5.42	0.78469	5.42	2.79734	5.42	0.85754	5.42	107.237	5.42	54.6342	5.42
0.77316	5.92	0.0749	5.92	0.78471	5.92	2.79751	5.92	0.85755	5.92	107.267	5.92	54.6347	5.92
0.77324	5.72	0.0749	5.72	0.78473	5.72	2.79775	5.72	0.85757	5.72	107.283	5.72	54.639	5.72
0.77332	5.33	0.0749	5.33	0.78473	5.33	2.79786	5.33	0.85768	5.33	107.299	5.33	54.6403	5.33
0.7734	5.59	0.0749	5.59	0.78475	5.59	2.79788	5.59	0.8577	5.59	107.305	5.59	54.6464	5.59
0.77341	5.49	0.07491	5.49	0.78479	5.49	2.79794	5.49	0.85771	5.49	107.315	5.49	54.663	5.49
0.77347	5.66	0.07492	5.66	0.78482	5.66	2.79841	5.66	0.85772	5.66	107.347	5.66	54.6665	5.66
0.77351	5.84	0.07492	5.84	0.78483	5.84	2.79842	5.84	0.85772	5.84	107.365	5.84	54.6668	5.84
0.77369	5.5	0.07493	5.5	0.78484	5.5	2.79872	5.5	0.85774	5.5	107.365	5.5	54.6768	5.5
0.77407	5.28	0.07498	5.28	0.78484	5.28	2.79873	5.28	0.85774	5.28	107.368	5.28	54.6788	5.28
0.77413	5.52	0.07499	5.52	0.78485	5.52	2.79878	5.52	0.85776	5.52	107.383	5.52	54.6805	5.52
0.7744	5.7	0.07499	5.7	0.7849	5.7	2.79887	5.7	0.85777	5.7	107.396	5.7	54.6869	5.7
0.77478	5.87	0.07499	5.87	0.78491	5.87	2.79895	5.87	0.85778	5.87	107.397	5.87	54.6944	5.87
0.77532	5.96	0.07499	5.96	0.78498	5.96	2.79897	5.96	0.85779	5.96	107.41	5.96	54.7077	5.96
0.7754	5.42	0.07502	5.42	0.785	5.42	2.79901	5.42	0.85783	5.42	107.458	5.42	54.7098	5.42
0.77544	5.41	0.07502	5.41	0.78501	5.41	2.79953	5.41	0.85784	5.41	107.473	5.41	54.7181	5.41
0.77566	5.48	0.07502	5.48	0.78501	5.48	2.79976	5.48	0.85791	5.48	107.5	5.48	54.7207	5.48
0.77567	5.6	0.07504	5.6	0.78503	5.6	2.79989	5.6	0.85791	5.6	107.507	5.6	54.7276	5.6
0.77569	5.45	0.07507	5.45	0.78505	5.45	2.8	5.45	0.85792	5.45	107.51	5.45	54.7309	5.45
0.77583	5.6	0.07509	5.6	0.78509	5.6	2.80011	5.6	0.85793	5.6	107.517	5.6	54.7336	5.6
0.77584	5.87	0.07509	5.87	0.78511	5.87	2.80015	5.87	0.85794	5.87	107.524	5.87	54.7348	5.87
0.77588	5.61	0.07511	5.61	0.78512	5.61	2.80054	5.61	0.85795	5.61	107.555	5.61	54.7349	5.61
0.77602	5.67	0.07512	5.67	0.78513	5.67	2.8009	5.67	0.85795	5.67	107.557	5.67	54.7409	5.67
0.77611	5.47	0.07513	5.47	0.78514	5.47	2.80106	5.47	0.85799	5.47	107.567	5.47	54.7421	5.47
0.77627	5.75	0.07514	5.75	0.78521	5.75	2.8011	5.75	0.85799	5.75	107.581	5.75	54.7426	5.75
0.77634	5.56	0.07515	5.56	0.78526	5.56	2.80113	5.56	0.85803	5.56	107.581	5.56	54.7473	5.56
0.77638	5.41	0.07515	5.41	0.78531	5.41	2.80115	5.41	0.85806	5.41	107.595	5.41	54.7519	5.41
0.7765	5.27	0.07516	5.27	0.78532	5.27	2.80126	5.27	0.85806	5.27	107.602	5.27	54.7529	5.27
0.77653	5.53	0.07516	5.53	0.78535	5.53	2.8013	5.53	0.85811	5.53	107.608	5.53	54.756	5.53
0.77667	5.25	0.07517	5.25	0.78535	5.25	2.80149	5.25	0.85812	5.25	107.615	5.25	54.7582	5.25
0.77703	5.65	0.0752	5.65	0.78549	5.65	2.80154	5.65	0.85814	5.65	107.62	5.65	54.768	5.65
0.77709	5.44	0.0752	5.44	0.78555	5.44	2.80162	5.44	0.85816	5.44	107.621	5.44	54.774	5.44
0.77719	5.37	0.07521	5.37	0.78559	5.37	2.80179	5.37	0.85817	5.37	107.629	5.37	54.7764	5.37
0.77722	5.38	0.07521	5.38	0.7856	5.38	2.80183	5.38	0.85819	5.38	107.631	5.38	54.7792	5.38
0.77746	5.43	0.07521	5.43	0.7856	5.43	2.80194	5.43	0.8582	5.43	107.633	5.43	54.7841	5.43
0.7775	5.72	0.07522	5.72	0.78563	5.72	2.80209	5.72	0.85822	5.72	107.642	5.72	54.7907	5.72
0.77775	5.96	0.07524	5.96	0.78566	5.96	2.8021	5.96	0.85822	5.96	107.647	5.96	54.7912	5.96
0.77785	5.69	0.07528	5.69	0.78567	5.69	2.8022	5.69	0.85836	5.69	107.664	5.69	54.7913	5.69
0.77792	5.15	0.0753	5.15	0.78568	5.15	2.80222	5.15	0.85836	5.15	107.666	5.15	54.7954	5.15
0.77825	5.57	0.07531	5.57	0.78569	5.57	2.80237	5.57	0.85836	5.57	107.684	5.57	54.7976	5.57
0.77827	5.67	0.07532	5.67	0.78571	5.67	2.80254	5.67	0.85836	5.67	107.685	5.67	54.8051	5.67
0.77833	5.32	0.07532	5.32	0.78574	5.32	2.80256	5.32	0.85837	5.32	107.692	5.32	54.8051	5.32
0.77839	5.49	0.07535	5.49	0.78577	5.49	2.80264	5.49	0.85839	5.49	107.695	5.49	54.8061	5.49
0.77857	5.61	0.07535	5.61	0.78577	5.61	2.80323	5.61	0.8584	5.61	107.697	5.61	54.812	5.61
0.77885	5.66	0.07538	5.66	0.7858	5.66	2.80338	5.66	0.85841	5.66	107.698	5.66	54.814	5.66
0.77896	5.77	0.07539	5.77	0.78587	5.77	2.80356	5.77	0.85841	5.77	107.713	5.77	54.816	5.77
0.779	5.9	0.0754	5.9	0.78594	5.9	2.8036	5.9	0.85843	5.9	107.728	5.9	54.8231	5.9
0.77906	5.63	0.07544	5.63	0.78596	5.63	2.80367	5.63	0.85843	5.63	107.749	5.63	54.8274	5.63
0.77938	5.62	0.07546	5.62	0.78598	5.62	2.8037	5.62	0.85845	5.62	107.756	5.62	54.8302	5.62
0.77945	5.69	0.07546	5.69	0.78602	5.69	2.8038	5.69	0.85845	5.69	107.757	5.69	54.8317	5.69
0.77947	6	0.07546	6	0.78603	6	2.80384	6	0.85846	6	107.782	6	54.8429	6
0.77953	5.31	0.07548	5.31	0.78606	5.31	2.80399	5.31	0.85847	5.31	107.784	5.31	54.843	5.31
0.77971	5.91	0.07549	5.91	0.78607	5.91	2.80405	5.91	0.85851	5.91	107.808	5.91	54.8436	5.91
0.77985	5.45	0.0755	5.45	0.78611	5.45	2.80425	5.45	0.85856	5.45	107.84	5.45	54.8493	5.45
0.77993	5.66	0.07552	5.66	0.78613	5.66	2.80433	5.66	0.85859	5.66	107.841	5.66	54.8508	5.66
0.78016	5.69	0.07554	5.69	0.78613	5.69	2.80441	5.69	0.85859	5.69	107.853	5.69	54.856	5.69
0.78026	5.61	0.07555	5.61	0.78617	5.61	2.80447	5.61	0.85859	5.61	107.87	5.61	54.8603	5.61
0.78046	5.85	0.07555	5.85	0.78619	5.85	2.80453	5.85	0.85861	5.85	107.907	5.85	54.866	5.85
0.7805	5.87	0.07559	5.87	0.78622	5.87	2.80454	5.87	0.85863	5.87	107.919	5.87	54.8662	5.87
0.78066	5.69	0.0756	5.69	0.78622	5.69	2.80515	5.69	0.85867	5.69	107.928	5.69	54.8709	5.69
0.78083	5.34	0.0756	5.34	0.78624	5.34	2.80523	5.34	0.85867	5.34	107.931	5.34	54.8777	5.34
0.78112	5.43	0.07562	5.43	0.78625	5.43	2.80527	5.43	0.85869	5.43	107.94	5.43	54.878	5.43
0.78117	5.31	0.07562	5.31	0.78634	5.31	2.80531	5.31	0.8587	5.31	107.967	5.31	54.8787	5.31
0.78122	5.66	0.07563	5.66	0.78638	5.66	2.80538	5.66	0.8587	5.66	107.967	5.66	54.8802	5.66
0.78135	5.73	0.07563	5.73	0.78642	5.73	2.80571	5.73	0.85872	5.73	107.991	5.73	54.8803	5.73
0.78136	5.53	0.07564	5.53	0.78644	5.53	2.80609	5.53	0.85875	5.53	107.994	5.53	54.8856	5.53
0.78141	5.79	0.07564	5.79	0.78644	5.79	2.80609	5.79	0.85876	5.79	108.006	5.79	54.8931	5.79
0.78154	5.6	0.07564	5.6	0.78645	5.6	2.8061	5.6	0.85878	5.6	108.017	5.6	54.9021	5.6
0.78172	5.57	0.07566	5.57	0.78646	5.57	2.80623	5.57	0.85878	5.57	108.032	5.57	54.9039	5.57
0.78197	5.25	0.07567	5.25	0.78647	5.25	2.80637	5.25	0.8588	5.25	108.037	5.25	54.91	5.25
0.78222	5.47	0.07568	5.47	0.7865	5.47	2.80651	5.47	0.85885	5.47	108.042	5.47	54.9111	5.47
0.78224	5.46	0.07568	5.46	0.7865	5.46	2.80657	5.46	0.85886	5.46	108.083	5.46	54.9125	5.46
0.78238	5.75	0.07573	5.75	0.78651	5.75	2.80669	5.75	0.85889	5.75	108.087	5.75	54.9132	5.75
0.78257	5.5	0.07574	5.5	0.78651	5.5	2.8067	5.5	0.8589	5.5	108.092	5.5	54.9146	5.5
0.78258	5.43	0.07575	5.43	0.78653	5.43	2.80682	5.43	0.85891	5.43	108.105	5.43	54.9155	5.43
0.78266	5.75	0.07575	5.75	0.78661	5.75	2.80689	5.75	0.85892	5.75	108.109	5.75	54.9174	5.75
0.78268	5.54	0.07576	5.54	0.78666	5.54	2.8069	5.54	0.85894	5.54	108.111	5.54	54.924	5.54
0.78278	5.49	0.07576	5.49	0.78671	5.49	2.80709	5.49	0.85896	5.49	108.133	5.49	54.9256	5.49
0.78319	5.28	0.07577	5.28	0.78676	5.28	2.80732	5.28	0.85896	5.28	108.164	5.28	54.926	5.28
0.78339	5.83	0.07579	5.83	0.78676	5.83	2.80735	5.83	0.85899	5.83	108.178	5.83	54.9323	5.83
0.78342	5.58	0.07582	5.58	0.78677	5.58	2.8074	5.58	0.85901	5.58	108.206	5.58	54.9332	5.58
0.78368	5.54	0.07584	5.54	0.78681	5.54	2.80757	5.54	0.85901	5.54	108.221	5.54	54.9442	5.54
0.78376	5.39	0.07584	5.39	0.78682	5.39	2.80758	5.39	0.85902	5.39	108.226	5.39	54.9454	5.39
0.78381	5.36	0.07585	5.36	0.78688	5.36	2.80792	5.36	0.85906	5.36	108.233	5.36	54.9459	5.36
0.78383	5.39	0.07585	5.39	0.78689	5.39	2.80836	5.39	0.85908	5.39	108.245	5.39	54.9502	5.39
0.78388	5.45	0.07585	5.45	0.78696	5.45	2.80842	5.45	0.85908	5.45	108.246	5.45	54.958	5.45
0.78397	5.62	0.07587	5.62	0.78697	5.62	2.80852	5.62	0.85912	5.62	108.247	5.62	54.9634	5.62
0.78409	5.2	0.07589	5.2	0.78698	5.2	2.80864	5.2	0.85913	5.2	108.266	5.2	54.9676	5.2
0.78418	5.65	0.0759	5.65	0.787	5.65	2.80872	5.65	0.85913	5.65	108.278	5.65	54.9744	5.65
0.78421	5.42	0.0759	5.42	0.78705	5.42	2.80876	5.42	0.85914	5.42	108.291	5.42	54.9759	5.42
0.78465	5.65	0.07592	5.65	0.78705	5.65	2.80903	5.65	0.85914	5.65	108.3	5.65	54.9795	5.65
0.78468	5.57	0.07593	5.57	0.78707	5.57	2.80922	5.57	0.85915	5.57	108.311	5.57	54.98	5.57
0.78473	5.43	0.07594	5.43	0.78713	5.43	2.8093	5.43	0.85917	5.43	108.315	5.43	54.9801	5.43
0.78476	5.91	0.07595	5.91	0.78717	5.91	2.80931	5.91	0.85917	5.91	108.328	5.91	54.9813	5.91
0.78482	5.67	0.07597	5.67	0.78719	5.67	2.80932	5.67	0.85921	5.67	108.34	5.67	54.9823	5.67
0.78499	5.59	0.07601	5.59	0.7872	5.59	2.80954	5.59	0.85922	5.59	108.363	5.59	54.9834	5.59
0.78511	5.66	0.07603	5.66	0.78723	5.66	2.80962	5.66	0.85922	5.66	108.419	5.66	54.9947	5.66
0.78519	5.82	0.07605	5.82	0.78728	5.82	2.81008	5.82	0.85924	5.82	108.437	5.82	54.9997	5.82
0.78533	5.76	0.07605	5.76	0.78731	5.76	2.81025	5.76	0.85924	5.76	108.442	5.76	54.9999	5.76
0.78541	5.36	0.07606	5.36	0.78734	5.36	2.81033	5.36	0.85925	5.36	108.463	5.36	55.0005	5.36
0.78547	5.78	0.07607	5.78	0.78736	5.78	2.81059	5.78	0.85926	5.78	108.472	5.78	55.0018	5.78
0.78555	5.44	0.07607	5.44	0.78737	5.44	2.81066	5.44	0.85928	5.44	108.476	5.44	55.0138	5.44
0.78622	5.54	0.07607	5.54	0.78737	5.54	2.81074	5.54	0.85928	5.54	108.497	5.54	55.0147	5.54
0.78675	6	0.07608	6	0.78738	6	2.81083	6	0.85934	6	108.509	6	55.0179	6
0.78676	5.57	0.07608	5.57	0.78744	5.57	2.81103	5.57	0.85935	5.57	108.531	5.57	55.0198	5.57
0.78678	5.84	0.07609	5.84	0.78747	5.84	2.81121	5.84	0.85935	5.84	108.532	5.84	55.0245	5.84
0.7869	5.42	0.07611	5.42	0.78749	5.42	2.81123	5.42	0.85936	5.42	108.557	5.42	55.026	5.42
0.78691	5.36	0.07611	5.36	0.78749	5.36	2.8116	5.36	0.85936	5.36	108.603	5.36	55.0327	5.36
0.787	5.64	0.07612	5.64	0.78751	5.64	2.81164	5.64	0.85938	5.64	108.609	5.64	55.0348	5.64
0.78712	5.31	0.07616	5.31	0.78751	5.31	2.81167	5.31	0.85944	5.31	108.647	5.31	55.0351	5.31
0.78712	5.6	0.07616	5.6	0.78752	5.6	2.81181	5.6	0.85945	5.6	108.653	5.6	55.0433	5.6
0.78712	5.14	0.07617	5.14	0.78753	5.14	2.81196	5.14	0.85946	5.14	108.666	5.14	55.0477	5.14
0.78713	5.6	0.07618	5.6	0.78755	5.6	2.81198	5.6	0.85946	5.6	108.668	5.6	55.0494	5.6
0.78744	5.43	0.07619	5.43	0.78755	5.43	2.8121	5.43	0.85948	5.43	108.674	5.43	55.0495	5.43
0.78744	5.65	0.0762	5.65	0.78768	5.65	2.81211	5.65	0.85949	5.65	108.683	5.65	55.0524	5.65
0.78746	5.36	0.0762	5.36	0.78769	5.36	2.81224	5.36	0.85952	5.36	108.685	5.36	55.0532	5.36
0.78747	5.96	0.07621	5.96	0.7877	5.96	2.8124	5.96	0.85954	5.96	108.698	5.96	55.0532	5.96
0.78771	5.77	0.07621	5.77	0.78771	5.77	2.81273	5.77	0.85958	5.77	108.72	5.77	55.0555	5.77
0.78778	5.44	0.07621	5.44	0.78773	5.44	2.81277	5.44	0.85962	5.44	108.754	5.44	55.0593	5.44
0.78783	5.37	0.07622	5.37	0.78774	5.37	2.81296	5.37	0.85968	5.37	108.756	5.37	55.0649	5.37
0.78787	5.73	0.07623	5.73	0.78774	5.73	2.81318	5.73	0.85969	5.73	108.773	5.73	55.0697	5.73
0.78787	5.1	0.07624	5.1	0.78779	5.1	2.81339	5.1	0.8597	5.1	108.783	5.1	55.0743	5.1
0.788	5.85	0.07625	5.85	0.78781	5.85	2.81346	5.85	0.8597	5.85	108.786	5.85	55.0767	5.85
0.78805	5.68	0.07627	5.68	0.78784	5.68	2.81353	5.68	0.8597	5.68	108.788	5.68	55.0775	5.68
0.78806	5.25	0.07627	5.25	0.78785	5.25	2.8136	5.25	0.85971	5.25	108.811	5.25	55.0816	5.25
0.78807	5.4	0.07628	5.4	0.78786	5.4	2.81391	5.4	0.85972	5.4	108.816	5.4	55.084	5.4
0.78866	5.56	0.07634	5.56	0.78789	5.56	2.81411	5.56	0.85974	5.56	108.816	5.56	55.0843	5.56
0.78871	5.27	0.07635	5.27	0.78801	5.27	2.81414	5.27	0.85974	5.27	108.818	5.27	55.0875	5.27
0.78897	5.45	0.07635	5.45	0.78804	5.45	2.8142	5.45	0.85974	5.45	108.827	5.45	55.0887	5.45
0.78918	5.85	0.07638	5.85	0.78806	5.85	2.81423	5.85	0.85975	5.85	108.843	5.85	55.0899	5.85
0.78942	5.59	0.07638	5.59	0.78807	5.59	2.81429	5.59	0.85976	5.59	108.863	5.59	55.0941	5.59
0.7895	5.38	0.07638	5.38	0.78807	5.38	2.81443	5.38	0.85976	5.38	108.885	5.38	55.0974	5.38
0.78953	5.3	0.07638	5.3	0.78811	5.3	2.81443	5.3	0.85976	5.3	108.894	5.3	55.0976	5.3
0.78961	5.81	0.07641	5.81	0.78811	5.81	2.81456	5.81	0.85977	5.81	108.902	5.81	55.0986	5.81
0.78969	5.49	0.07642	5.49	0.78814	5.49	2.81464	5.49	0.8598	5.49	108.908	5.49	55.1011	5.49
0.78978	5.34	0.07643	5.34	0.78817	5.34	2.81471	5.34	0.85983	5.34	108.916	5.34	55.1012	5.34
0.79018	5.43	0.07644	5.43	0.78821	5.43	2.81488	5.43	0.85985	5.43	108.924	5.43	55.1013	5.43
0.79019	5.65	0.07644	5.65	0.78823	5.65	2.81494	5.65	0.85986	5.65	108.927	5.65	55.1018	5.65
0.79033	5.62	0.07645	5.62	0.78828	5.62	2.815	5.62	0.85987	5.62	108.944	5.62	55.1031	5.62
0.79051	5.82	0.07645	5.82	0.78831	5.82	2.81509	5.82	0.85988	5.82	108.963	5.82	55.1062	5.82
0.79055	5.6	0.07646	5.6	0.78831	5.6	2.81516	5.6	0.85992	5.6	108.974	5.6	55.1085	5.6
0.7908	5.59	0.07647	5.59	0.78833	5.59	2.81532	5.59	0.86	5.59	109.014	5.59	55.1128	5.59
0.79112	5.6	0.07648	5.6	0.78834	5.6	2.81538	5.6	0.86003	5.6	109.025	5.6	55.1154	5.6
0.79115	5.53	0.07648	5.53	0.78836	5.53	2.81546	5.53	0.86005	5.53	109.037	5.53	55.1157	5.53
0.79117	5.83	0.07649	5.83	0.78846	5.83	2.81584	5.83	0.86006	5.83	109.053	5.83	55.1235	5.83
[truncated: 3,328 more rows]

## Sheet: fig 3
C	SSIM	Enr	SSIM	H	SSIM	Ent	SSIM	Corr	SSIM	M	SSIM	Std	SSIM
[truncated: 5,041 more rows]

## Sheet: fig 4
C	Corr	Enr	Corr	H	Corr	Ent	Corr	Corr	Corr	M	Corr	Std	Corr
[truncated: 5,041 more rows]

[truncated: 7 more sheets: fig 5, fig 6, fig 8, fig 9, fig 10, fig 11, fig 14]
